# Supplementary material for: Genetic and dietary modulators of the inflammatory response in the gastrointestinal tract of the BXD mouse genetic reference population
Source: eLife. 2023 Oct 19;12:RP87569. doi: 10.7554/eLife.87569 (PMC10586803; doi:10.7554/eLife.87569)
Supplement: Supplementary file 1. — Related to Figure 3. [file elife-87569-supp1.xlsx]

## Sheet: colon_HFD_modules
Gene name	Modules
Saa1	HFD_M1
H2afv	HFD_M1
Mrpl33	HFD_M1
Brd7	HFD_M1
Atp5c1	HFD_M1
Ndufa5	HFD_M1
Kri1	HFD_M1
Oat	HFD_M1
Ostf1	HFD_M1
Dhx16	HFD_M1
Srsf1	HFD_M1
Rplp0	HFD_M1
Ssbp1	HFD_M1
Rfxap	HFD_M1
Ptms	HFD_M1
Smim11	HFD_M1
Ndufa4	HFD_M1
Cd9	HFD_M1
Cdc37	HFD_M1
Id2	HFD_M1
Dnajb11	HFD_M1
Kcne3	HFD_M1
Slc30a5	HFD_M1
Acp1	HFD_M1
Nr1h3	HFD_M1
Hypk	HFD_M1
Mrps33	HFD_M1
Fahd1	HFD_M1
Eif1ax	HFD_M1
Rpa3	HFD_M1
2310036O22Rik	HFD_M1
Abracl	HFD_M1
Cox6c	HFD_M1
Gng11	HFD_M1
Psmc1	HFD_M1
Pfdn2	HFD_M1
Cfb	HFD_M1
Pnpla8	HFD_M1
Sod2	HFD_M1
Mrpl51	HFD_M1
Rbm17	HFD_M1
Glrx3	HFD_M1
Nudt3	HFD_M1
Shfm1	HFD_M1
Fam173a	HFD_M1
Dcps	HFD_M1
Chrac1	HFD_M1
Polr2d	HFD_M1
Dvl1	HFD_M1
Lrrc26	HFD_M1
Chchd1	HFD_M1
Gm10094	HFD_M1
Ndufs5	HFD_M1
Emc6	HFD_M1
Plscr1	HFD_M1
Sumo1	HFD_M1
Park7	HFD_M1
Arrb2	HFD_M1
Dynlt1b	HFD_M1
Dynlt1c	HFD_M1
Psma5	HFD_M1
Cd14	HFD_M1
Calm2	HFD_M1
AA467197	HFD_M1
Zfp326	HFD_M1
Mrpl24	HFD_M1
Pja1	HFD_M1
0610009B22Rik	HFD_M1
Psmd6	HFD_M1
Ankrd10	HFD_M1
Dpm3	HFD_M1
Pih1d1	HFD_M1
Ncbp2	HFD_M1
Hnrnph3	HFD_M1
Ddx39	HFD_M1
Brk1	HFD_M1
Tmem242	HFD_M1
Nfkb2	HFD_M1
Ndufb6	HFD_M1
Cox5b	HFD_M1
1190007I07Rik	HFD_M1
Prpf38a	HFD_M1
Eif3i	HFD_M1
Cldn7	HFD_M1
Arpc3	HFD_M1
Ncbp1	HFD_M1
Exosc3	HFD_M1
Commd1	HFD_M1
Rsl24d1	HFD_M1
6330403K07Rik	HFD_M1
Sqstm1	HFD_M1
Clec3b	HFD_M1
Uckl1	HFD_M1
Atp5l	HFD_M1
Arglu1	HFD_M1
Mrps12	HFD_M1
Mphosph6	HFD_M1
Pigx	HFD_M1
Ahctf1	HFD_M1
Mrps14	HFD_M1
Cnn3	HFD_M1
Hmgn1	HFD_M1
Ndufb10	HFD_M1
Polr3gl	HFD_M1
Ndufaf5	HFD_M1
Rpl36al	HFD_M1
Noxo1	HFD_M1
Cgnl1	HFD_M1
Tff3	HFD_M1
AI837181	HFD_M1
Med21	HFD_M1
Ddr1	HFD_M1
Fcna	HFD_M1
Dnajc19	HFD_M1
Nmi	HFD_M1
Ccdc142	HFD_M1
Commd3	HFD_M1
Neil1	HFD_M1
Cbfb	HFD_M1
Arpp19	HFD_M1
Psme1	HFD_M1
Ptpn18	HFD_M1
Sec23ip	HFD_M1
Ccr2	HFD_M1
Rbm8a	HFD_M1
Gm13736	HFD_M1
Dynlt1a	HFD_M1
Atp5g3	HFD_M1
N6amt2	HFD_M1
Ppp1r14b	HFD_M1
Pafah1b1	HFD_M1
Ube2s	HFD_M1
Hspe1	HFD_M1
Dhx38	HFD_M1
Mir23b	HFD_M1
Casp12	HFD_M1
Psmb10	HFD_M1
Imp3	HFD_M1
Lbhd1	HFD_M1
Dgkz	HFD_M1
Cyth2	HFD_M1
Lzic	HFD_M1
H2-Ke6	HFD_M1
Sars	HFD_M1
Mrpl3	HFD_M1
Psme2b	HFD_M1
Nsmce4a	HFD_M1
Romo1	HFD_M1
Myh14	HFD_M1
Serpini1	HFD_M1
Cox14	HFD_M1
Pmpcb	HFD_M1
Hccs	HFD_M1
Ppp1r21	HFD_M1
Rfc2	HFD_M1
Exosc7	HFD_M1
Pspc1	HFD_M1
Zmym3	HFD_M1
Rnf41	HFD_M1
Snrpd2	HFD_M1
Ndnl2	HFD_M1
Pdcl3	HFD_M1
Hprt	HFD_M1
Pgp	HFD_M1
Chmp5	HFD_M1
Nudt21	HFD_M1
Egln1	HFD_M1
Ezh2	HFD_M1
Pop5	HFD_M1
Chchd2	HFD_M1
Commd8	HFD_M1
Dynlt1f	HFD_M1
Sdcbp2	HFD_M1
Psmb3	HFD_M1
Tmem147	HFD_M1
Commd2	HFD_M1
Rnf166	HFD_M1
Maged1	HFD_M1
Txnl4a	HFD_M1
Denr	HFD_M1
Med22	HFD_M1
Ndufb7	HFD_M1
Crem	HFD_M1
Tceanc2	HFD_M1
Hat1	HFD_M1
As3mt	HFD_M1
Xpo7	HFD_M1
Fam65a	HFD_M1
Hmgn5	HFD_M1
Rab24	HFD_M1
2010107G23Rik	HFD_M1
Snrpn	HFD_M1
Nop10	HFD_M1
Rab11a	HFD_M1
Snrpe	HFD_M1
Glod5	HFD_M1
Cdv3	HFD_M1
Stk4	HFD_M1
H2afy	HFD_M1
Coa3	HFD_M1
Erh	HFD_M1
Sf3b2	HFD_M1
Mrpl13	HFD_M1
Bud31	HFD_M1
Bop1	HFD_M1
Mpc2	HFD_M1
Gm3837	HFD_M1
Polr2j	HFD_M1
2410016O06Rik	HFD_M1
Dnaja2	HFD_M1
Uba2	HFD_M1
Polr2g	HFD_M1
Ptgr1	HFD_M1
Srrt	HFD_M1
Hmgn2	HFD_M1
Sdccag8	HFD_M1
Ndufa11	HFD_M1
Tmem238	HFD_M1
Pick1	HFD_M1
Gm12657	HFD_M1
Bex2	HFD_M1
Ndufb8	HFD_M1
Coa6	HFD_M1
Aup1	HFD_M1
Myo1a	HFD_M1
Lamtor4	HFD_M1
Tifa	HFD_M1
Serbp1	HFD_M1
Rab40c	HFD_M1
Eif3k	HFD_M1
Nsrp1	HFD_M1
Ogfr	HFD_M1
Fundc1	HFD_M1
Gipc1	HFD_M1
Thoc7	HFD_M1
Mdp1	HFD_M1
Tmf1	HFD_M1
3830403N18Rik	HFD_M1
Rrp1	HFD_M1
Stra13	HFD_M1
Msl1	HFD_M1
Brix1	HFD_M1
Nhp2	HFD_M1
Fkbp3	HFD_M1
Pycard	HFD_M1
Atg3	HFD_M1
Ndufa1	HFD_M1
Psmd10	HFD_M1
Mrps5	HFD_M1
Snx9	HFD_M1
Eif1b	HFD_M1
Abcf1	HFD_M1
Rassf10	HFD_M1
Ube2e2	HFD_M1
Mrpl1	HFD_M1
Vti1b	HFD_M1
Rpgrip1l	HFD_M1
Gm8539	HFD_M1
Nip7	HFD_M1
Svbp	HFD_M1
Txndc16	HFD_M1
Foxo4	HFD_M1
Hist2h2ab	HFD_M1
Mrps21	HFD_M1
Ube2d2a	HFD_M1
Med8	HFD_M1
Cdo1	HFD_M1
Ppp2cb	HFD_M1
Ppp1r1b	HFD_M1
Supv3l1	HFD_M1
Tmem251	HFD_M1
Psma3	HFD_M1
Nudt2	HFD_M1
Pno1	HFD_M1
Flot1	HFD_M1
Srp14	HFD_M1
Rnf103	HFD_M1
Dnajc9	HFD_M1
Ufc1	HFD_M1
Apol11a	HFD_M1
Cct5	HFD_M1
Rnf113a2	HFD_M1
U2af1	HFD_M1
Ift80	HFD_M1
Ppp2r2d	HFD_M1
Pdcd5	HFD_M1
Tmem258	HFD_M1
Smc3	HFD_M1
Gm5848	HFD_M1
Ak1	HFD_M1
Glrx5	HFD_M1
Sart1	HFD_M1
Rpf2	HFD_M1
Pnn	HFD_M1
Fbxw7	HFD_M1
Gm8069	HFD_M1
Mgst3	HFD_M1
Cuedc2	HFD_M1
Hsdl1	HFD_M1
Pold4	HFD_M1
Cnpy2	HFD_M1
Pdlim4	HFD_M1
Spag7	HFD_M1
Siah1a	HFD_M1
Med30	HFD_M1
Atox1	HFD_M1
Ankrd13c	HFD_M1
Bad	HFD_M1
Mcl1	HFD_M1
Sec11a	HFD_M1
Senp3	HFD_M1
Psmg4	HFD_M1
Etv3	HFD_M1
Epb41l2	HFD_M1
Prkag1	HFD_M1
Ptcd2	HFD_M1
Ado	HFD_M1
Rabggtb	HFD_M1
Cfdp1	HFD_M1
Sarnp	HFD_M1
Anp32b	HFD_M1
Bola1	HFD_M1
Cox7a2	HFD_M1
Atp5j2	HFD_M1
Myeov2	HFD_M1
Gnl3	HFD_M1
Trappc6b	HFD_M1
Prmt1	HFD_M1
Mettl10	HFD_M1
Hace1	HFD_M1
Actr1b	HFD_M1
Atp5e	HFD_M1
Kansl2	HFD_M1
Arl6ip5	HFD_M1
Phkg2	HFD_M1
Tipin	HFD_M1
Serf2	HFD_M1
Synj2bp	HFD_M1
LOC102641600	HFD_M1
Rab19	HFD_M1
Dcun1d5	HFD_M1
Mterf4	HFD_M1
Trmt12	HFD_M1
Sec11c	HFD_M1
Nup210	HFD_M1
Zbtb8a	HFD_M1
Uqcrb	HFD_M1
Mark3	HFD_M1
Khdrbs3	HFD_M1
Cebpd	HFD_M1
Ngrn	HFD_M1
Crnkl1	HFD_M1
Med10	HFD_M1
Pcca	HFD_M1
Ube2m	HFD_M1
Arf5	HFD_M1
Thyn1	HFD_M1
Stk24	HFD_M1
Coasy	HFD_M1
Atp5j	HFD_M1
Adipor2	HFD_M1
AI597479	HFD_M1
Ccdc28a	HFD_M1
Prdx2	HFD_M1
Erp29	HFD_M1
Uqcc3	HFD_M1
Rasgef1b	HFD_M1
Pbxip1	HFD_M1
Ndufs4	HFD_M1
Snx7	HFD_M1
Drap1	HFD_M1
Fis1	HFD_M1
Gm3476	HFD_M1
Znrf1	HFD_M1
Osgep	HFD_M1
Guca2a	HFD_M1
Nme3	HFD_M1
Ndufa13	HFD_M1
Txlna	HFD_M1
Ssh3	HFD_M1
Nt5c3b	HFD_M1
Pdf	HFD_M1
Trnt1	HFD_M1
Dph5	HFD_M1
Ankra2	HFD_M1
BC030336	HFD_M1
Trim35	HFD_M1
Zfp91	HFD_M1
Ccdc47	HFD_M1
Ndufa2	HFD_M1
Zfp131	HFD_M1
Ms4a10	HFD_M1
Clk2	HFD_M1
Abhd17b	HFD_M1
Gmfg	HFD_M1
Man1a2	HFD_M1
Tma7	HFD_M1
Fopnl	HFD_M1
Sra1	HFD_M1
Mxra7	HFD_M1
Mcts1	HFD_M1
Snrnp27	HFD_M1
Ephb1	HFD_M1
Haus1	HFD_M1
Clns1a	HFD_M1
Tmem208	HFD_M1
Krtcap3	HFD_M1
D8Ertd738e	HFD_M1
Ffar2	HFD_M1
Nedd8	HFD_M1
Gm3371	HFD_M1
Rapgefl1	HFD_M1
Nfyb	HFD_M1
Sec61b	HFD_M1
Tmem126a	HFD_M1
Hgfac	HFD_M1
Timm22	HFD_M1
Isy1	HFD_M1
Psma6	HFD_M1
Mrpl55	HFD_M1
Mrpl14	HFD_M1
Itgb1bp1	HFD_M1
Mettl14	HFD_M1
Naa38	HFD_M1
Tor1a	HFD_M1
Zfp616	HFD_M1
Tmem179b	HFD_M1
Dlg1	HFD_M1
Fam167a	HFD_M1
Nck2	HFD_M1
Dtymk	HFD_M1
Gm5624	HFD_M1
Snapc5	HFD_M1
Tmem70	HFD_M1
Nol12	HFD_M1
Sumo3	HFD_M1
Faim	HFD_M1
Slc39a1	HFD_M1
Ccdc144b	HFD_M1
Hacd1	HFD_M1
Atp5k	HFD_M1
Ppib	HFD_M1
Emilin1	HFD_M1
Tsfm	HFD_M1
Pgrmc2	HFD_M1
Pigyl	HFD_M1
2410004B18Rik	HFD_M1
Suds3	HFD_M1
Higd1a	HFD_M1
Steap4	HFD_M1
Degs1	HFD_M1
Epsti1	HFD_M1
Alg5	HFD_M1
Gm5084	HFD_M1
Atp5o	HFD_M1
Tpd52l2	HFD_M1
Ccdc25	HFD_M1
Fam136a	HFD_M1
Snrpb2	HFD_M1
Eed	HFD_M1
4933402E13Rik	HFD_M1
Msh6	HFD_M1
Gins4	HFD_M1
Ikbkap	HFD_M1
Stxbp1	HFD_M1
Cep83	HFD_M1
Sin3b	HFD_M1
Aldh1a2	HFD_M1
Cd48	HFD_M1
Nt5c	HFD_M1
Fastkd1	HFD_M1
Ccdc64b	HFD_M1
Mepce	HFD_M1
Gnl1	HFD_M1
Ndufs2	HFD_M1
Fam32a	HFD_M1
Eif4a3	HFD_M1
Zpr1	HFD_M1
Rbx1	HFD_M1
Snx17	HFD_M1
Uqcc2	HFD_M1
Metap2	HFD_M1
Dnajc1	HFD_M1
Nudc	HFD_M1
Pnck	HFD_M1
Cdk11b	HFD_M1
Nt5c2	HFD_M1
Eef1e1	HFD_M1
Thy1	HFD_M1
5830473C10Rik	HFD_M1
Csnk2a2	HFD_M1
Iqcd	HFD_M1
Slc37a4	HFD_M1
Pcmt1	HFD_M1
Adnp	HFD_M1
Lysmd1	HFD_M1
Stx4a	HFD_M1
Pwwp2a	HFD_M1
1700021F05Rik	HFD_M1
Selk	HFD_M1
Cpne7	HFD_M1
Tmbim4	HFD_M1
Thap4	HFD_M1
Urm1	HFD_M1
Mrps26	HFD_M1
Slirp	HFD_M1
Sct	HFD_M1
Plaa	HFD_M1
Grb2	HFD_M1
Dnajc4	HFD_M1
Pex7	HFD_M1
Polr2f	HFD_M1
Aamp	HFD_M1
Dusp19	HFD_M1
Zc2hc1a	HFD_M1
Plod1	HFD_M1
Rrp15	HFD_M1
Sertad3	HFD_M1
Mip	HFD_M1
Timm8b	HFD_M1
2014-09-01	HFD_M1
Tubb2b	HFD_M1
Pard3b	HFD_M1
H2-Q5	HFD_M1
Hspb11	HFD_M1
Ube2d3	HFD_M1
Arl6ip4	HFD_M1
Gnpnat1	HFD_M1
Prkrir	HFD_M1
Foxd2	HFD_M1
Fbxo4	HFD_M1
Sgcb	HFD_M1
Ccdc59	HFD_M1
Slc7a6os	HFD_M1
Timm8a1	HFD_M1
Ift57	HFD_M1
Ngdn	HFD_M1
Cox8a	HFD_M1
Ndufb2	HFD_M1
Ldhb	HFD_M1
Ppp2r3c	HFD_M1
Ier3ip1	HFD_M1
Fam3a	HFD_M1
Cenpw	HFD_M1
Decr1	HFD_M1
Scpep1	HFD_M1
Tbpl1	HFD_M1
Wdr61	HFD_M1
Cep95	HFD_M1
2310033P09Rik	HFD_M1
Mrpl11	HFD_M1
Gm3187	HFD_M1
Dus3l	HFD_M1
Hexim1	HFD_M1
Usp37	HFD_M1
Rbm28	HFD_M1
Egln2	HFD_M1
Rtf1	HFD_M1
Cox19	HFD_M1
Brcc3	HFD_M1
Psmc5	HFD_M1
Zfp952	HFD_M1
Ptges3	HFD_M1
Slc30a9	HFD_M1
Tnfrsf18	HFD_M1
Hmgb3	HFD_M1
Trpm5	HFD_M1
Psma4	HFD_M1
2510002D24Rik	HFD_M1
Slc9b1	HFD_M1
Znhit1	HFD_M1
Prpf19	HFD_M1
Sh2d1b2	HFD_M1
Med19	HFD_M1
Mydgf	HFD_M1
Hs6st1	HFD_M1
Fam92a	HFD_M1
Serf1	HFD_M1
Upf3b	HFD_M1
Tasp1	HFD_M1
Mrpl12	HFD_M1
Pdcd11	HFD_M1
Smim7	HFD_M1
Ccz1	HFD_M1
Polr1d	HFD_M1
Pir	HFD_M1
Zfp3	HFD_M1
Pphln1	HFD_M1
Hist1h4h	HFD_M1
Gm7226	HFD_M1
Tmsb15b2	HFD_M1
Jakmip1	HFD_M1
Psma7	HFD_M1
Pstk	HFD_M1
Lysmd2	HFD_M1
Gpalpp1	HFD_M1
Glod4	HFD_M1
Prdx6b	HFD_M1
Cope	HFD_M1
Cfap100	HFD_M1
Ifit1bl2	HFD_M1
Cep97	HFD_M1
Ppp5c	HFD_M1
Col11a1	HFD_M1
P4hb	HFD_M1
Col4a1	HFD_M1
Ilvbl	HFD_M1
Rnh1	HFD_M1
Ldlrap1	HFD_M1
Psmb4	HFD_M1
Rhox10	HFD_M1
Itpka	HFD_M1
Pomc	HFD_M1
Polr3e	HFD_M1
Gm19945	HFD_M1
Gse1	HFD_M1
Commd9	HFD_M1
0610010K14Rik	HFD_M1
Alkbh6	HFD_M1
Emc8	HFD_M1
Pop1	HFD_M1
Zfp90	HFD_M1
Smad7	HFD_M1
Spcs1	HFD_M1
Tnfaip8	HFD_M1
Lyrm2	HFD_M1
Lsm3	HFD_M1
Jrkl	HFD_M1
Wash1	HFD_M1
Slc25a28	HFD_M1
Rab26	HFD_M1
Zmat2	HFD_M1
Cisd2	HFD_M1
1110004E09Rik	HFD_M1
Upp1	HFD_M1
Lmnb2	HFD_M1
Tceb1	HFD_M1
Tnfrsf11a	HFD_M1
Zbtb8os	HFD_M1
Strap	HFD_M1
Pole3	HFD_M1
Jtb	HFD_M1
Ahsa2	HFD_M1
Aimp1	HFD_M1
Vps28	HFD_M1
Mrps34	HFD_M1
Hes7	HFD_M1
Bbip1	HFD_M1
Tysnd1	HFD_M1
Pot1b	HFD_M1
Cstf2t	HFD_M1
Manbal	HFD_M1
Trim39	HFD_M1
Tmem205	HFD_M1
Brd1	HFD_M1
Tbce	HFD_M1
Ppp1r2	HFD_M1
Eri3	HFD_M1
Pdap1	HFD_M1
Hopx	HFD_M1
Arfip2	HFD_M1
Akr1c12	HFD_M1
Gtf3a	HFD_M1
Adrbk1	HFD_M1
H60b	HFD_M1
Rfpl4	HFD_M1
Snx14	HFD_M1
Rassf1	HFD_M1
Tfam	HFD_M1
Nudt16l1	HFD_M1
Tomm70a	HFD_M1
Slc25a19	HFD_M1
Pxylp1	HFD_M1
Pim3	HFD_M1
Spsb4	HFD_M1
L1td1	HFD_M1
Tmem128	HFD_M1
Ndufb5	HFD_M1
Pias4	HFD_M1
Rce1	HFD_M1
Ifi35	HFD_M1
Ikbip	HFD_M1
Prpf18	HFD_M1
Blvra	HFD_M1
Aprt	HFD_M1
Ddx47	HFD_M1
Plrg1	HFD_M1
Slc46a3	HFD_M1
Gch1	HFD_M1
Specc1	HFD_M1
Hps1	HFD_M1
Pacrg	HFD_M1
Nudt14	HFD_M1
Tgm4	HFD_M1
Bak1	HFD_M1
Larp1b	HFD_M1
Gpa33	HFD_M1
Lsm8	HFD_M1
Amica1	HFD_M1
Tcf25	HFD_M1
Ppm1g	HFD_M1
Ccdc88a	HFD_M1
Vps72	HFD_M1
Tomm6	HFD_M1
Gzma	HFD_M1
Dtwd1	HFD_M1
Sigirr	HFD_M1
Lsm1	HFD_M1
Izumo4	HFD_M1
0610011F06Rik	HFD_M1
Abhd11	HFD_M1
Gm10563	HFD_M1
Dbnl	HFD_M1
Hdhd3	HFD_M1
Tspo	HFD_M1
Ift43	HFD_M1
Ttc23	HFD_M1
Suclg1	HFD_M1
Timm13	HFD_M1
Tmem29	HFD_M1
Cand1	HFD_M1
Zfand3	HFD_M1
Bcl7b	HFD_M1
Zbed3	HFD_M1
Sav1	HFD_M1
Mllt3	HFD_M1
Ddx23	HFD_M1
Pfdn6	HFD_M1
Ndufab1	HFD_M1
H2-Q1	HFD_M1
Ddt	HFD_M1
Arid4a	HFD_M1
Akap17b	HFD_M1
Htatsf1	HFD_M1
Samm50	HFD_M1
Vsig2	HFD_M1
Mrpl22	HFD_M1
Rangrf	HFD_M1
Cks1b	HFD_M1
Uhrf2	HFD_M1
Mrpl30	HFD_M1
A830010M20Rik	HFD_M1
Mrps18c	HFD_M1
Rab33b	HFD_M1
Ppp4r1	HFD_M1
Vmn2r6	HFD_M1
Rasl11b	HFD_M1
Las1l	HFD_M1
Anapc4	HFD_M1
Nsg2	HFD_M1
Pi4ka	HFD_M1
Tsta3	HFD_M1
Src	HFD_M1
Gm10439	HFD_M1
Prkaca	HFD_M1
Cks2	HFD_M1
Cox11	HFD_M1
Gipc3	HFD_M1
Vps37c	HFD_M1
Acads	HFD_M1
Spire2	HFD_M1
Hmox2	HFD_M1
2007-09-01	HFD_M1
Slco1a6	HFD_M1
Nelfe	HFD_M1
2010107E04Rik	HFD_M1
Akt1	HFD_M1
Cdx1	HFD_M1
Il7	HFD_M1
Unc119	HFD_M1
Ppp1ca	HFD_M1
Etnk1	HFD_M1
Ap1s3	HFD_M1
Npc2	HFD_M1
Pccb	HFD_M1
Plac8	HFD_M1
Gfer	HFD_M1
Ube2n	HFD_M1
Atp6v1c1	HFD_M1
Gm16494	HFD_M1
Pes1	HFD_M1
Dnajb14	HFD_M1
Traf2	HFD_M1
Utp3	HFD_M1
Dusp22	HFD_M1
Mb21d2	HFD_M1
Fbxw17	HFD_M1
Cep135	HFD_M1
Mvb12a	HFD_M1
Irf8	HFD_M1
Ptk2b	HFD_M1
Fkbp7	HFD_M1
Nme2	HFD_M1
Prmt2	HFD_M1
C1qbp	HFD_M1
Dynll2	HFD_M1
Gm11096	HFD_M1
Ppp2r4	HFD_M1
Srfbp1	HFD_M1
Dsel	HFD_M1
Mpv17l2	HFD_M1
Ccs	HFD_M1
Ahsa1	HFD_M1
Tomm22	HFD_M1
1110059G10Rik	HFD_M1
Dapk3	HFD_M1
Rgs19	HFD_M1
Coq3	HFD_M1
Neurod6	HFD_M1
Rexo2	HFD_M1
Aga	HFD_M1
Rnf40	HFD_M1
Erich4	HFD_M1
Phactr3	HFD_M1
Uchl5	HFD_M1
Mrpl43	HFD_M1
Csmd2os	HFD_M1
Palm	HFD_M1
S100a13	HFD_M1
Slc25a15	HFD_M1
Eif2b5	HFD_M1
Dcbld2	HFD_M1
Mars	HFD_M1
Xab2	HFD_M1
Frmpd1	HFD_M1
Rb1cc1	HFD_M1
Pecr	HFD_M1
Nop58	HFD_M1
Sec24c	HFD_M1
Hoxc9	HFD_M1
Tmem109	HFD_M1
Stk3	HFD_M1
Mrpl23	HFD_M1
Prosc	HFD_M1
Ppp1r16a	HFD_M1
Gpr108	HFD_M1
Tmem194b	HFD_M1
Zfp507	HFD_M1
Ccdc124	HFD_M1
Itpkc	HFD_M1
Raly	HFD_M1
Cd2bp2	HFD_M1
Poc1a	HFD_M1
Clec1b	HFD_M1
Adgra3	HFD_M1
Sptssa	HFD_M1
Ercc6	HFD_M1
Bag5	HFD_M1
Pdzd4	HFD_M1
Tvp23b	HFD_M1
Aif1l	HFD_M1
Zfp229	HFD_M1
Ppic	HFD_M1
Bcl2l2	HFD_M1
Smndc1	HFD_M1
Ndfip1	HFD_M1
Smim13	HFD_M1
Cfap126	HFD_M1
Ssb	HFD_M1
Pex5	HFD_M1
Rbmxl1	HFD_M1
Ubn1	HFD_M1
Zc2hc1c	HFD_M1
Uqcr11	HFD_M1
Ddx31	HFD_M1
Sdcbp	HFD_M1
Hnrnpc	HFD_M1
Gtf2h5	HFD_M1
Cct3	HFD_M1
Cops8	HFD_M1
Snw1	HFD_M1
Tnik	HFD_M1
2510009E07Rik	HFD_M1
Shb	HFD_M1
Pdrg1	HFD_M1
Rpl27	HFD_M1
Neurl1b	HFD_M1
Map2k1	HFD_M1
Dcaf13	HFD_M1
Fam104a	HFD_M1
Haus4	HFD_M1
Psmc3	HFD_M1
Dnpep	HFD_M1
Zbed5	HFD_M1
Clec14a	HFD_M1
Smu1	HFD_M1
Srp19	HFD_M1
Gm19916	HFD_M1
Ebna1bp2	HFD_M1
LOC100861596	HFD_M1
Sgf29	HFD_M1
Cenpv	HFD_M1
Gpr89	HFD_M1
Cc2d1a	HFD_M1
Dstn	HFD_M1
Ndufa9	HFD_M1
Dnajc21	HFD_M1
Thoc1	HFD_M1
Pawr	HFD_M1
1810043H04Rik	HFD_M1
Hint2	HFD_M1
Tnni1	HFD_M1
Cox7b	HFD_M1
Chmp1a	HFD_M1
Sox5	HFD_M1
Arhgef9	HFD_M1
Snrpd3	HFD_M1
Pex2	HFD_M1
Nipsnap1	HFD_M1
2310039H08Rik	HFD_M1
Pip5k1a	HFD_M1
Exosc9	HFD_M1
Zfp286	HFD_M1
Efhd2	HFD_M1
Acyp1	HFD_M1
Lcmt1	HFD_M1
Zscan20	HFD_M1
Akap9	HFD_M1
Mtif3	HFD_M1
Bcdin3d	HFD_M1
Gm10135	HFD_M1
Arl6ip6	HFD_M1
Med4	HFD_M1
Tm4sf20	HFD_M1
Tatdn1	HFD_M1
Prl8a8	HFD_M1
Tamm41	HFD_M1
Gjb1	HFD_M1
Bex1	HFD_M1
Zbtb3	HFD_M1
Fabp5	HFD_M1
Stx12	HFD_M1
Trappc4	HFD_M1
Cdk7	HFD_M1
Mpp2	HFD_M1
Tmem261	HFD_M1
Tstd3	HFD_M1
Rmdn2	HFD_M1
Gpatch3	HFD_M1
Pfdn1	HFD_M1
Mkrn2os	HFD_M1
Pilrb1	HFD_M1
Cul2	HFD_M1
Ranbp3	HFD_M1
Htatip2	HFD_M1
5730559C18Rik	HFD_M1
Numbl	HFD_M1
Sec61g	HFD_M1
Fhad1	HFD_M1
Zfp459	HFD_M1
Mdm1	HFD_M1
Pam16	HFD_M1
Casp6	HFD_M1
Alpk1	HFD_M1
Mettl21a	HFD_M1
Ssna1	HFD_M1
Gm14406	HFD_M1
Gm14444	HFD_M1
Hist1h2ba	HFD_M1
Cep112	HFD_M1
Lrr1	HFD_M1
Gng5	HFD_M1
Timmdc1	HFD_M1
Sh3bgr	HFD_M1
Zfp831	HFD_M1
Aox4	HFD_M1
Trim59	HFD_M1
Ing2	HFD_M1
Rsg1	HFD_M1
Trim27	HFD_M1
Psme2	HFD_M1
Rpusd4	HFD_M1
Cfap36	HFD_M1
Cenpk	HFD_M1
H2-L	HFD_M1
Itm2c	HFD_M1
Rpain	HFD_M1
C920025E04Rik	HFD_M1
Cgrrf1	HFD_M1
Atp6v1f	HFD_M1
Gpatch11	HFD_M1
Eif3g	HFD_M1
Cotl1	HFD_M1
Chmp3	HFD_M1
Ankrd50	HFD_M1
Dync1li1	HFD_M1
Orc6	HFD_M1
Rpl10	HFD_M1
Slc25a51	HFD_M1
Sgip1	HFD_M1
Aatf	HFD_M1
Rxrb	HFD_M1
Pemt	HFD_M1
Garnl3	HFD_M1
Polr2h	HFD_M1
Ino80b	HFD_M1
Srsf6	HFD_M1
Grpel1	HFD_M1
Vcpkmt	HFD_M1
Actr3	HFD_M1
Hmbs	HFD_M1
1700125H20Rik	HFD_M1
Smim4	HFD_M1
Nhp2l1	HFD_M1
Utp18	HFD_M1
Mina	HFD_M1
Tnfrsf14	HFD_M1
Pnkp	HFD_M1
Mrpl54	HFD_M1
Tbl2	HFD_M1
Cenpt	HFD_M1
Tex261	HFD_M1
Fam96b	HFD_M1
Zfp433	HFD_M1
Psmb6	HFD_M1
Hemk1	HFD_M1
Sap30bp	HFD_M1
Ost4	HFD_M1
Uqcr10	HFD_M1
Tead1	HFD_M1
Rab28	HFD_M1
Tprgl	HFD_M1
Dnttip2	HFD_M1
Cebpzos	HFD_M1
Cdc34	HFD_M1
D130043K22Rik	HFD_M1
Sumf1	HFD_M1
Nipsnap3b	HFD_M1
Snip1	HFD_M1
Scmh1	HFD_M1
Gstm5	HFD_M1
Plekha5	HFD_M1
Mrpl57	HFD_M1
Tcaf1	HFD_M1
Zfp622	HFD_M1
Agtr1b	HFD_M1
Meig1	HFD_M1
Asb6	HFD_M1
Bambi	HFD_M1
Polr2i	HFD_M1
Rfxank	HFD_M1
Casc3	HFD_M1
Phf20l1	HFD_M1
Gm561	HFD_M1
Mul1	HFD_M1
Mitd1	HFD_M1
Stx8	HFD_M1
Cib1	HFD_M1
Cpne8	HFD_M1
Mapk8	HFD_M1
Sf3b5	HFD_M1
Cyc1	HFD_M1
Gm10134	HFD_M1
Thap2	HFD_M1
Hebp1	HFD_M1
Rnaseh2c	HFD_M1
Elf3	HFD_M1
Eif4ebp1	HFD_M1
Ndufb4	HFD_M1
Tmem199	HFD_M1
Grk4	HFD_M1
Rnf138	HFD_M1
Sf3a1	HFD_M1
Scaf1	HFD_M1
Crip1	HFD_M1
Sdc1	HFD_M1
Ccdc85b	HFD_M1
Rab13	HFD_M1
Impa1	HFD_M1
Pttg1	HFD_M1
Gypc	HFD_M1
Iba57	HFD_M1
Cdkn2b	HFD_M1
Ercc3	HFD_M1
Ung	HFD_M1
Tut1	HFD_M1
Tfip11	HFD_M1
Zfp395	HFD_M1
Mrpl46	HFD_M1
Nr2c2ap	HFD_M1
Ndfip2	HFD_M1
Slc39a5	HFD_M1
Selm	HFD_M1
Gm21834	HFD_M1
Reep5	HFD_M1
1600002K03Rik	HFD_M1
4931400O07Rik	HFD_M1
Ube2dnl1	HFD_M1
Cnot8	HFD_M1
Ppie	HFD_M1
Lsm4	HFD_M1
Tmed9	HFD_M1
Fgfbp1	HFD_M1
Pak2	HFD_M1
Nmu	HFD_M1
Tbc1d10b	HFD_M1
Keap1	HFD_M1
Klf17	HFD_M1
Pbx2	HFD_M1
Rabep1	HFD_M1
Cep19	HFD_M1
Usp16	HFD_M1
Ccdc181	HFD_M1
Cacna1s	HFD_M1
Neu3	HFD_M1
Zc3h15	HFD_M1
Chst9	HFD_M1
Zfp959	HFD_M1
Scn8a	HFD_M1
Zeb2os	HFD_M1
Tmem222	HFD_M1
Rbbp8nl	HFD_M1
Dpcd	HFD_M1
Aspscr1	HFD_M1
Slc5a3	HFD_M1
Pkp3	HFD_M1
Psmd4	HFD_M1
Gtpbp2	HFD_M1
Tnnt3	HFD_M1
Smarcd2	HFD_M1
Mpnd	HFD_M1
Gpn1	HFD_M1
Tex22	HFD_M1
Hagh	HFD_M1
Dgcr6	HFD_M1
Gm10129	HFD_M1
Med7	HFD_M1
Asah1	HFD_M1
Fam207a	HFD_M1
Bccip	HFD_M1
Abra	HFD_M1
Iffo2	HFD_M1
Sucla2	HFD_M1
Kctd16	HFD_M1
D030056L22Rik	HFD_M1
BC021767	HFD_M1
Lsm10	HFD_M1
Nubp1	HFD_M1
Psmg2	HFD_M1
Trappc3	HFD_M1
Prm2	HFD_M1
Eif4h	HFD_M1
Ankrd46	HFD_M1
Aip	HFD_M1
Rnaseh2b	HFD_M1
Rnf215	HFD_M1
Borcs8	HFD_M1
Dld	HFD_M1
Chmp2a	HFD_M1
Polr3k	HFD_M1
2700062C07Rik	HFD_M1
Wrnip1	HFD_M1
Kctd17	HFD_M1
Gm4184	HFD_M1
Ptpmt1	HFD_M1
Sil1	HFD_M1
Rdm1	HFD_M1
Hsf3	HFD_M1
Cox17	HFD_M1
Ccdc167	HFD_M1
Pin4	HFD_M1
Abcf2	HFD_M1
Nat9	HFD_M1
Uqcrfs1	HFD_M1
Map2k4	HFD_M1
Zfp281	HFD_M1
Zfand2b	HFD_M1
Tes	HFD_M1
Smim20	HFD_M1
Tigar	HFD_M1
Pnp2	HFD_M1
Gigyf2	HFD_M1
Rnf34	HFD_M1
Ppy	HFD_M1
Acbd6	HFD_M1
Coro1b	HFD_M1
Pfdn4	HFD_M1
Ndufa10	HFD_M1
Aph1c	HFD_M1
Pyroxd1	HFD_M1
Mrps31	HFD_M1
Bcl2l13	HFD_M1
Tpgs1	HFD_M1
Ccdc122	HFD_M1
Hnrnpll	HFD_M1
Bcat2	HFD_M1
Gadd45g	HFD_M1
Cltb	HFD_M1
Col6a5	HFD_M1
Ube2e1	HFD_M1
Rassf7	HFD_M1
Ndufv3	HFD_M1
Pigv	HFD_M1
Rfx2	HFD_M1
Prps1	HFD_M1
Alg1	HFD_M1
Akr1a1	HFD_M1
Pebp1	HFD_M1
Ccdc152	HFD_M1
Timm21	HFD_M1
Tomm7	HFD_M1
Fbxl15	HFD_M1
Lamtor5	HFD_M1
Gm17581	HFD_M1
Wdr92	HFD_M1
Xlr3a	HFD_M1
Bcl6b	HFD_M1
Tmem218	HFD_M1
Crisp4	HFD_M1
Mrpl27	HFD_M1
Sema6c	HFD_M1
Setd6	HFD_M1
Ak5	HFD_M1
Cnih4	HFD_M1
Sdf2	HFD_M1
Tspan8	HFD_M1
1110001J03Rik	HFD_M1
Tbl3	HFD_M1
Med28	HFD_M1
Tspan15	HFD_M1
Trim15	HFD_M1
Fgf10	HFD_M1
Esam	HFD_M1
Gpatch4	HFD_M1
Tshz3	HFD_M1
Mrrf	HFD_M1
Ssr4	HFD_M1
Spg11	HFD_M1
Sdhb	HFD_M1
Atg5	HFD_M1
Casp1	HFD_M1
Alkbh7	HFD_M1
Clip1	HFD_M1
Ccdc153	HFD_M1
Churc1	HFD_M1
Chaf1a	HFD_M1
Ptges3l	HFD_M1
Ap2a1	HFD_M1
Lamtor1	HFD_M1
Hspa9	HFD_M1
Apol7a	HFD_M1
Gm1141	HFD_M1
Lrrc42	HFD_M1
Npr2	HFD_M1
Sec62	HFD_M1
Gm9631	HFD_M1
Slc33a1	HFD_M1
Mgmt	HFD_M1
Wwox	HFD_M1
Taldo1	HFD_M1
Commd4	HFD_M1
6230426M11Rik	HFD_M1
Zfp787	HFD_M1
Cc2d1b	HFD_M1
Ruvbl1	HFD_M1
Rgcc	HFD_M1
Rdh10	HFD_M1
Dolk	HFD_M1
Pygo2	HFD_M1
Yipf1	HFD_M1
Mapt	HFD_M1
Zfp944	HFD_M1
Mrpl28	HFD_M1
Hdgfrp2	HFD_M1
Ahi1	HFD_M1
Echs1	HFD_M1
Pycrl	HFD_M1
Lsm14a	HFD_M1
Ppp2r5d	HFD_M1
Nab2	HFD_M1
Uqcc1	HFD_M1
Pole	HFD_M1
Ass1	HFD_M1
Lrrc51	HFD_M1
Galk1	HFD_M1
Gm19399	HFD_M1
Gm16867	HFD_M1
Uqcrq	HFD_M1
9130008F23Rik	HFD_M1
Ddx51	HFD_M1
Txnrd2	HFD_M1
Bicd1	HFD_M1
Galnt12	HFD_M1
Armcx1	HFD_M1
Vax2	HFD_M1
1110059E24Rik	HFD_M1
Gm7008	HFD_M1
Pdzd11	HFD_M1
Trim28	HFD_M1
Blvrb	HFD_M1
Rbp7	HFD_M1
Zfp119a	HFD_M1
Rrp36	HFD_M1
Ndufaf2	HFD_M1
Dctpp1	HFD_M1
Gtf2h2	HFD_M1
Shisa2	HFD_M1
Ccdc91	HFD_M1
Gm12355	HFD_M1
Dnaja4	HFD_M1
Xlr3b	HFD_M1
Smpx	HFD_M1
2700094K13Rik	HFD_M1
Zfp85	HFD_M1
Tbcd	HFD_M1
Exo5	HFD_M1
Pvrl2	HFD_M1
Abcb9	HFD_M1
Polb	HFD_M1
Dnajc15	HFD_M1
Dvl2	HFD_M1
Dph3	HFD_M1
Crk	HFD_M1
Cenpj	HFD_M1
Lypd8	HFD_M1
D17H6S53E	HFD_M1
Klhdc10	HFD_M1
D2Wsu81e	HFD_M1
Nostrin	HFD_M1
Gatm	HFD_M1
Cebpg	HFD_M1
Ttc4	HFD_M1
Arl16	HFD_M1
Phf11b	HFD_M1
Olfr340	HFD_M1
Rbm41	HFD_M1
Aaed1	HFD_M1
Smap1	HFD_M1
Pnkd	HFD_M1
Exph5	HFD_M1
Urah	HFD_M1
Riok3	HFD_M1
Ormdl1	HFD_M1
Itgae	HFD_M1
Dap3	HFD_M1
AU022252	HFD_M1
Gsg1l2	HFD_M1
H2-T22	HFD_M1
P3h4	HFD_M1
Cpsf3l	HFD_M1
Brf2	HFD_M1
Morn4	HFD_M1
Psmd8	HFD_M1
Crlf2	HFD_M1
Uck1	HFD_M1
9430069I07Rik	HFD_M1
Fmr1nb	HFD_M1
Dohh	HFD_M1
R3hcc1	HFD_M1
Frg1	HFD_M1
Ak3	HFD_M1
Ggct	HFD_M1
Frmd8	HFD_M1
Hddc2	HFD_M1
Ddx49	HFD_M1
Ints5	HFD_M1
Tmem138	HFD_M1
Nop9	HFD_M1
1700071K01Rik	HFD_M1
Samd12	HFD_M1
Eif3j2	HFD_M1
Mtx1	HFD_M1
Galc	HFD_M1
Zrsr2	HFD_M1
Dock3	HFD_M1
Isca2	HFD_M1
Rin1	HFD_M1
Ramp1	HFD_M1
Itgb3bp	HFD_M1
Ddx55	HFD_M1
Rab5a	HFD_M1
Ppm1e	HFD_M1
Cblc	HFD_M1
Dcxr	HFD_M1
Mrpl17	HFD_M1
Crct1	HFD_M1
Hist2h2be	HFD_M1
Cox6b1	HFD_M1
Dus4l	HFD_M1
Cdpf1	HFD_M1
Fcf1	HFD_M1
Cfap97	HFD_M1
Zmat3	HFD_M1
Gpr180	HFD_M1
Slc25a32	HFD_M1
Iqcc	HFD_M1
Atad3a	HFD_M1
Cmss1	HFD_M1
Gnb2	HFD_M1
Bax	HFD_M1
Epn1	HFD_M1
Tmem62	HFD_M1
Borcs7	HFD_M1
Xlr	HFD_M1
Serpinb5	HFD_M1
Pigf	HFD_M1
Trpt1	HFD_M1
Cbr4	HFD_M1
Cops3	HFD_M1
5031425E22Rik	HFD_M1
Elavl2	HFD_M1
Zfp688	HFD_M1
Ibsp	HFD_M1
Gm9257	HFD_M1
Tmem192	HFD_M1
Tubb2a	HFD_M1
Atf3	HFD_M1
Tmem11	HFD_M1
Mfn2	HFD_M1
Nudt7	HFD_M1
Ap2s1	HFD_M1
Fn3krp	HFD_M1
Hs3st3b1	HFD_M1
Ankrd40	HFD_M1
Gfap	HFD_M1
Rraga	HFD_M1
Ptrh2	HFD_M1
Peo1	HFD_M1
Trmt10b	HFD_M1
Gm10509	HFD_M1
Tprkb	HFD_M1
Cyb5r4	HFD_M1
Thnsl2	HFD_M1
Scrn2	HFD_M1
Rsph3b	HFD_M1
Mrps24	HFD_M1
Krt27	HFD_M1
Edf1	HFD_M1
Jsrp1	HFD_M1
Hist1h2ac	HFD_M1
Txndc11	HFD_M1
Gm9999	HFD_M1
Atp5s	HFD_M1
Rnf121	HFD_M1
Vps4a	HFD_M1
Ccdc94	HFD_M1
Sema7a	HFD_M1
Nupl2	HFD_M1
Efnb3	HFD_M1
Psmb5	HFD_M1
Znhit2	HFD_M1
Mob2	HFD_M1
Mien1	HFD_M1
Tuft1	HFD_M1
Ing3	HFD_M1
Anapc11	HFD_M1
Gadd45a	HFD_M1
Slc25a30	HFD_M1
Katna1	HFD_M1
Mrpl42	HFD_M1
Pigk	HFD_M1
Atp6v1e1	HFD_M1
Vstm2l	HFD_M1
Ero1l	HFD_M1
Irak4	HFD_M1
Arf3	HFD_M1
Anapc13	HFD_M1
C530008M17Rik	HFD_M1
Snupn	HFD_M1
Mkx	HFD_M1
Hdac2	HFD_M1
Vmn2r80	HFD_M1
Tmem14c	HFD_M1
Pak7	HFD_M1
Rsph3a	HFD_M1
Podxl	HFD_M1
Pgf	HFD_M1
Trim40	HFD_M1
Cox7a1	HFD_M1
Abhd13	HFD_M1
Casp3	HFD_M1
Gtf2b	HFD_M1
Zfp784	HFD_M1
Olfr1443	HFD_M1
Itgb7	HFD_M1
Tmem160	HFD_M1
Mthfd1l	HFD_M1
Chmp4b	HFD_M1
Enho	HFD_M1
Exoc6	HFD_M1
Ppp4c	HFD_M1
Zfp513	HFD_M1
Ddx27	HFD_M1
Fbxo22	HFD_M1
Dnajc2	HFD_M1
Nub1	HFD_M1
Igf2bp3	HFD_M1
Morf4l1	HFD_M1
Taf13	HFD_M1
Ddx1	HFD_M1
Rbks	HFD_M1
Ccpg1os	HFD_M1
Znrd1as	HFD_M1
Os9	HFD_M1
Mcm3ap	HFD_M1
Bloc1s5	HFD_M1
Cdk4	HFD_M1
Gm6747	HFD_M1
Cdkn2aip	HFD_M1
Lrwd1	HFD_M1
Mvp	HFD_M1
Mrpl9	HFD_M1
Stx18	HFD_M1
Sirt3	HFD_M1
Ogfrl1	HFD_M1
Gemin7	HFD_M1
Ndufb9	HFD_M1
Zfp637	HFD_M1
Slc35a1	HFD_M1
Dhrs7b	HFD_M1
Ackr4	HFD_M1
Tmem67	HFD_M1
Sde2	HFD_M1
Zfp560	HFD_M1
Igll1	HFD_M1
Carhsp1	HFD_M1
Myo18a	HFD_M1
Ear12	HFD_M1
Thop1	HFD_M1
Rpp14	HFD_M1
Zfp58	HFD_M1
Ccl8	HFD_M1
Spata1	HFD_M1
Ccdc174	HFD_M1
Tsr3	HFD_M1
Card9	HFD_M1
Tuba8	HFD_M1
Leo1	HFD_M1
Zfp777	HFD_M1
Pdcd2	HFD_M1
Srp68	HFD_M1
Nudt1	HFD_M1
Serpinb8	HFD_M1
Folr2	HFD_M1
Thumpd3	HFD_M1
C1qtnf2	HFD_M1
Eif2b4	HFD_M1
3110002H16Rik	HFD_M1
Mtx2	HFD_M1
Mzt1	HFD_M1
Gm26616	HFD_M1
Sh3pxd2b	HFD_M1
2700029M09Rik	HFD_M1
Tldc1	HFD_M1
Cast	HFD_M1
2610528J11Rik	HFD_M1
Rilpl2	HFD_M1
Bst2	HFD_M1
Ucn	HFD_M1
Smdt1	HFD_M1
Cdr1	HFD_M1
Pddc1	HFD_M1
Rpa2	HFD_M1
Rps6ka6	HFD_M1
Rnf7	HFD_M1
Spata5	HFD_M1
Hras	HFD_M1
Irf1	HFD_M1
Hist1h1c	HFD_M1
Get4	HFD_M1
1700052K11Rik	HFD_M1
Psmg1	HFD_M1
Acot9	HFD_M1
Il2ra	HFD_M1
Exosc5	HFD_M1
Pnmal1	HFD_M1
Mex3c	HFD_M1
Mrps23	HFD_M1
Tfap4	HFD_M1
Zfp72	HFD_M1
Fkbp8	HFD_M1
Sco1	HFD_M1
Smarca1	HFD_M1
Rras2	HFD_M1
Prkrip1	HFD_M1
Dnajb2	HFD_M1
Padi2	HFD_M1
Cfhr2	HFD_M1
Sh2b2	HFD_M1
Gm13889	HFD_M1
Akt1s1	HFD_M1
C1qtnf9	HFD_M1
Timm10b	HFD_M1
Rsph9	HFD_M1
Rps8	HFD_M1
Fez1	HFD_M1
Zfp82	HFD_M1
Daglb	HFD_M1
Bbof1	HFD_M1
Zfp574	HFD_M1
Gm20939	HFD_M1
Pdcl	HFD_M1
Chmp6	HFD_M1
Fbxo2	HFD_M1
Ndufa8	HFD_M1
Cyhr1	HFD_M1
2002-03-01	HFD_M1
Gm11627	HFD_M1
Mfsd5	HFD_M1
Ppa2	HFD_M1
Smarca5	HFD_M1
D10Jhu81e	HFD_M1
Ripply3	HFD_M1
Sult1b1	HFD_M1
Vstm2b	HFD_M1
Evi5l	HFD_M1
Fam50a	HFD_M1
Larp7	HFD_M1
6030469F06Rik	HFD_M1
Mettl13	HFD_M1
Pithd1	HFD_M1
Trp53rkb	HFD_M1
Pdlim2	HFD_M1
Rab1b	HFD_M1
Serpinb6b	HFD_M1
Drg1	HFD_M1
Fadd	HFD_M1
Tmem184b	HFD_M1
C330007P06Rik	HFD_M1
Safb	HFD_M1
Vapb	HFD_M1
Galnt9	HFD_M1
Glt28d2	HFD_M1
Dync2li1	HFD_M1
Spg7	HFD_M1
Metap1d	HFD_M1
Adgrf1	HFD_M1
Cwf19l1	HFD_M1
Gpr107	HFD_M1
Rpap3	HFD_M1
Ddx10	HFD_M1
Map2k2	HFD_M1
Sh3bp5l	HFD_M1
Gid8	HFD_M1
Zfp282	HFD_M1
Stxbp3-ps	HFD_M1
Acyp2	HFD_M1
Tm2d3	HFD_M1
Tmco1	HFD_M1
Anxa7	HFD_M1
Anapc7	HFD_M1
Fbxo7	HFD_M1
Clpp	HFD_M1
Sec14l2	HFD_M1
Tmem55b	HFD_M1
4930553M12Rik	HFD_M1
Mir1199	HFD_M1
Vkorc1	HFD_M1
Tjap1	HFD_M1
Slc3a2	HFD_M1
Triap1	HFD_M1
Susd1	HFD_M1
Smim22	HFD_M1
Bspry	HFD_M1
Egf	HFD_M1
Rdh1	HFD_M1
Tpbpa	HFD_M1
Grip1	HFD_M1
Rgs14	HFD_M1
Arl4c	HFD_M1
Dpf3	HFD_M1
Fh1	HFD_M1
Lmnb1	HFD_M1
Rap2b	HFD_M1
Smc6	HFD_M1
Wdr5b	HFD_M1
Bet1l	HFD_M1
Abhd14a	HFD_M1
Ccdc173	HFD_M1
Tnnt2	HFD_M1
Msantd4	HFD_M1
Tapbpl	HFD_M1
Rbck1	HFD_M1
Arpc4	HFD_M1
Slitrk2	HFD_M1
Arhgap28	HFD_M1
Rps27l	HFD_M1
Enox2	HFD_M1
Serpinb1b	HFD_M1
Guk1	HFD_M1
Slu7	HFD_M1
Prdx1	HFD_M1
Fmn1	HFD_M1
Nrgn	HFD_M1
Ebag9	HFD_M1
Rfesd	HFD_M1
Ptges2	HFD_M1
Nup37	HFD_M1
Nek9	HFD_M1
Ska2	HFD_M1
Psrc1	HFD_M1
Usp43	HFD_M1
Chmp1b	HFD_M1
Rnf20	HFD_M1
Jph4	HFD_M1
Bod1	HFD_M1
Frat1	HFD_M1
Gmnn	HFD_M1
Apol7d	HFD_M1
Mrto4	HFD_M1
Cep57l1	HFD_M1
Rai2	HFD_M1
Abhd5	HFD_M1
Vdac1	HFD_M1
Arl13b	HFD_M1
Wdr4	HFD_M1
Rchy1	HFD_M1
Gm5331	HFD_M1
Tyw5	HFD_M1
Speer2	HFD_M1
Gm13238	HFD_M1
Gm12166	HFD_M1
Aven	HFD_M1
1500009L16Rik	HFD_M1
1110065P20Rik	HFD_M1
Cyb5a	HFD_M1
B9d1	HFD_M1
Htr1f	HFD_M1
Gas2l1	HFD_M1
Nudt9	HFD_M1
Det1	HFD_M1
Gltp	HFD_M1
D2hgdh	HFD_M1
Ndufaf7	HFD_M1
Saysd1	HFD_M1
1700112E06Rik	HFD_M1
St3gal4	HFD_M1
Nudt22	HFD_M1
Prg2	HFD_M1
Gk2	HFD_M1
Yipf3	HFD_M1
Ercc2	HFD_M1
Aldoart1	HFD_M1
Cdca7	HFD_M1
Acadsb	HFD_M1
Tor2a	HFD_M1
Xlr4b	HFD_M1
C1d	HFD_M1
Cpox	HFD_M1
Carkd	HFD_M1
B3gnt8	HFD_M1
Syt7	HFD_M1
E130304I02Rik	HFD_M1
Cstb	HFD_M1
Nenf	HFD_M1
Gal	HFD_M1
2610524H06Rik	HFD_M1
Gm10767	HFD_M1
Ncbp3	HFD_M1
Emc9	HFD_M1
Gm12666	HFD_M1
Ryr2	HFD_M1
4930503L19Rik	HFD_M1
3110062M04Rik	HFD_M1
Rbp2	HFD_M1
Zfp882	HFD_M1
Odf2l	HFD_M1
Slpi	HFD_M1
Tmed1	HFD_M1
Rph3al	HFD_M1
Cutc	HFD_M1
Golga5	HFD_M1
H2afj	HFD_M1
Ankrd27	HFD_M1
Snrnp25	HFD_M1
9130401M01Rik	HFD_M1
Kbtbd3	HFD_M1
Rbm34	HFD_M1
Marveld3	HFD_M1
Mtg1	HFD_M1
Phactr1	HFD_M1
Mafk	HFD_M1
Mterf2	HFD_M1
Fbxw8	HFD_M1
Rnf150	HFD_M1
Faah	HFD_M1
Atp9a	HFD_M1
Aldh16a1	HFD_M1
Rap1gds1	HFD_M1
Defb8	HFD_M1
Abi3	HFD_M1
Stard7	HFD_M1
2810004N23Rik	HFD_M1
Zfp330	HFD_M1
Mxd4	HFD_M1
Creb3	HFD_M1
Afg3l1	HFD_M1
Gtf3c6	HFD_M1
Efhc1	HFD_M1
Shf	HFD_M1
Pck2	HFD_M1
Itpa	HFD_M1
Uxs1	HFD_M1
Txnl4b	HFD_M1
Rbmx2	HFD_M1
3110082I17Rik	HFD_M1
Pym1	HFD_M1
Uxt	HFD_M1
Pex19	HFD_M1
Lexm	HFD_M1
Fam183b	HFD_M1
Aggf1	HFD_M1
Ccdc12	HFD_M1
Vta1	HFD_M1
Myg1	HFD_M1
Bcl10	HFD_M1
Acss2	HFD_M1
Apoa1bp	HFD_M1
Dffa	HFD_M1
Psmb7	HFD_M1
Rnps1	HFD_M1
Ccdc112	HFD_M1
Tmem256	HFD_M1
Srek1ip1	HFD_M1
Tmem209	HFD_M1
Syap1	HFD_M1
Prdx5	HFD_M1
Uqcrc1	HFD_M1
Mettl24	HFD_M1
Cln5	HFD_M1
Cep290	HFD_M1
Traf3ip1	HFD_M1
Utp14a	HFD_M1
Cwc15	HFD_M1
Aldh7a1	HFD_M1
Hoxd3os1	HFD_M1
Hes3	HFD_M1
Usf1	HFD_M1
Cox5a	HFD_M1
Cbr2	HFD_M1
Retnla	HFD_M1
Mpc1	HFD_M1
Crtam	HFD_M1
Ten1	HFD_M1
Avpi1	HFD_M1
Pigc	HFD_M1
Nol4	HFD_M1
Fam133b	HFD_M1
Rbm7	HFD_M1
Kcnn4	HFD_M1
Gyg	HFD_M1
Tmem53	HFD_M1
Begain	HFD_M1
Sdhaf1	HFD_M1
Psmd9	HFD_M1
Cox7c	HFD_M1
Carnmt1	HFD_M1
Glrb	HFD_M1
Gcsam	HFD_M1
Lpin3	HFD_M1
BC052040	HFD_M1
Pradc1	HFD_M1
Fez2	HFD_M1
Gm11555	HFD_M2
Naip1	HFD_M2
Sppl2a	HFD_M2
Krtap4-8	HFD_M2
Krtap5-1	HFD_M2
Gm4553	HFD_M2
Gm10354	HFD_M2
Cldn34b4	HFD_M2
D830039M14Rik	HFD_M2
Rhox4e	HFD_M2
Gm11596	HFD_M2
Defb5	HFD_M2
LOC100504451	HFD_M2
Gm2745	HFD_M2
Krtap4-9	HFD_M2
H60c	HFD_M2
Gm5114	HFD_M2
Sprr2k	HFD_M2
Acap3	HFD_M2
Sel1l2	HFD_M2
Krtap10-10	HFD_M2
Olfr517	HFD_M2
Gm4399	HFD_M2
Gm4406	HFD_M2
Krtap9-1	HFD_M2
Calr4	HFD_M2
Pip5kl1	HFD_M2
Olfr323	HFD_M2
Usp26	HFD_M2
Vpreb2	HFD_M2
Slc11a2	HFD_M2
Gm21886	HFD_M2
Wfdc11	HFD_M2
Gm10153	HFD_M2
Plekhg4	HFD_M2
Gm21775	HFD_M2
Lce1a1	HFD_M2
LOC100504725	HFD_M2
Krtap5-4	HFD_M2
Olfr368	HFD_M2
Gm9969	HFD_M2
St6galnac1	HFD_M2
Krtap5-2	HFD_M2
Rhox4a	HFD_M2
Gm4791	HFD_M2
Tcl1b5	HFD_M2
H2-M5	HFD_M2
Iltifb	HFD_M2
Fam19a1	HFD_M2
Gm10674	HFD_M2
Gm10424	HFD_M2
Olfr101	HFD_M2
2010-03-01	HFD_M2
Gm11564	HFD_M2
Trpm1	HFD_M2
Gm17365	HFD_M2
Olfr76	HFD_M2
C87977	HFD_M2
Rhox2c	HFD_M2
Gm6309	HFD_M2
Gm10592	HFD_M2
Gm21968	HFD_M2
Popdc3	HFD_M2
Rgl3	HFD_M2
Cd209e	HFD_M2
Cbarp	HFD_M2
Sln	HFD_M2
Mettl21e	HFD_M2
Hephl1	HFD_M2
Rasal3	HFD_M2
Csprs	HFD_M2
Fxyd2	HFD_M2
Krtap1-5	HFD_M2
Gm5927	HFD_M2
4932415M13Rik	HFD_M2
Gm904	HFD_M2
Olfr1428	HFD_M2
Grm2	HFD_M2
Prl2c1	HFD_M2
Gata5os	HFD_M2
Krt6a	HFD_M2
Olfr282	HFD_M2
Olfr329-ps	HFD_M2
Gm17714	HFD_M2
Olfr373	HFD_M2
Fam109b	HFD_M2
Gm9340	HFD_M2
Lce1j	HFD_M2
Spata31d1c	HFD_M2
Gm9327	HFD_M2
Ggn	HFD_M2
Slc15a5	HFD_M2
Olfr663	HFD_M2
Egr4	HFD_M2
Wnt9a	HFD_M2
Gm11562	HFD_M2
Olfr279	HFD_M2
Prl7c1	HFD_M2
Gm14501	HFD_M2
Gm2391	HFD_M2
Klk13	HFD_M2
LOC100504180	HFD_M2
Rhox2a	HFD_M2
Igfn1	HFD_M2
Zdhhc22	HFD_M2
Apol9b	HFD_M2
Olfr1508	HFD_M2
Iqsec3	HFD_M2
Qprt	HFD_M2
Gm438	HFD_M2
Olfr828	HFD_M2
Fezf2	HFD_M2
Gm933	HFD_M2
Gm14476	HFD_M2
Gm14479	HFD_M2
Gm14482	HFD_M2
Gm14483	HFD_M2
Chst8	HFD_M2
Olfr1223	HFD_M2
Tulp3	HFD_M2
Wnt7a	HFD_M2
Cabp5	HFD_M2
Nphs1	HFD_M2
Tmod1	HFD_M2
Tnfrsf25	HFD_M2
Prss33	HFD_M2
Gp9	HFD_M2
Gm19956	HFD_M2
E130012A19Rik	HFD_M2
Syt12	HFD_M2
Vmn1r44	HFD_M2
Spata31d1a	HFD_M2
Gm11166	HFD_M2
Hsd3b6	HFD_M2
Fam163b	HFD_M2
Gm3409	HFD_M2
Tmem72	HFD_M2
Gm7714	HFD_M2
Slc22a13b-ps	HFD_M2
Gm8700	HFD_M2
Prkag3	HFD_M2
Gm4559	HFD_M2
Olfr1411	HFD_M2
C130060K24Rik	HFD_M2
Smok2b	HFD_M2
Klk1b4	HFD_M2
[truncated: 12,724 more rows]

## Sheet: Module Eigengenes (HFD)
Strain	Diet	HFD_M1	HFD_M2	HFD_M3	HFD_M4	HFD_M5	HFD_M6	HFD_M7	HFD_M8	HFD_M9	HFD_M10	HFD_M11	HFD_M12	HFD_M13	HFD_M14	HFD_M15	HFD_M16	HFD_M17	HFD_M18	HFD_M19	HFD_M20	HFD_M21	HFD_M22	HFD_M23	HFD_M24	HFD_M25	HFD_M26	HFD_M27	HFD_M28	HFD_M29	HFD_M30	HFD_M31	HFD_M32	HFD_M33	HFD_M34	HFD_M35	HFD_M36	HFD_M37	HFD_M38	HFD_M39
BXD1	HFD	-0.0313862	-0.0616768	-0.00653312	-0.0540341	0.0108476	0.144164	0.119239	0.0466389	-0.00860777	0.0441318	-0.0759505	0.030916	0.0756138	0.129549	0.172286	-0.0626652	-0.0516163	0.0602617	0.049828	-0.133703	0.0275127	0.0654262	0.139138	-0.0499733	0.047795	0.0820754	0.267544	-0.0688792	-0.111017	-0.0781672	0.117813	-0.0670545	-0.0635783	-0.0486903	-0.0139336	0.0738575	-0.138017	0.128887	0.168845
BXD101	HFD	0.260812	-0.114933	-0.198009	0.159187	0.23134	-0.227551	-0.296456	-0.0765984	0.0740956	-0.171173	0.0431445	0.156974	-0.0497919	-0.12311	0.0520333	-0.0300699	0.0813686	-0.216013	-0.0312582	-0.0949849	-0.198946	-0.295336	0.267599	-0.0635258	-0.0990243	0.136199	0.0503284	0.0014925	0.107259	-0.0679041	0.200079	0.107749	-0.308324	-0.11926	-0.148246	-0.11793	0.137317	0.143333	-0.164683
BXD11	HFD	-0.202419	0.0800999	-0.0370814	-0.118591	-0.139908	0.212236	0.273983	0.146356	0.113266	0.124856	-0.140391	-0.000124835	0.141685	0.220827	0.101362	0.0789267	-0.0333198	0.0432237	0.145623	-0.0417641	0.157786	0.223636	-0.163419	0.0534861	0.166339	0.0183558	-0.117693	-0.0732632	-0.166147	-0.00187298	0.072028	0.00755999	0.0246942	0.149853	0.0314952	-0.0057751	-0.144657	0.121428	0.122473
BXD12	HFD	-0.348475	0.461621	0.251534	-0.376711	-0.258133	-0.0447155	0.0193826	-0.0971914	-0.164177	-0.24942	-0.257634	-0.229291	-0.16787	0.0472508	-0.128202	-0.262045	-0.357119	0.230267	0.173032	-0.0177567	-0.0936736	0.233652	0.125847	0.124972	-0.235498	-0.247833	0.373152	-0.1366	-0.298678	-0.101301	-0.111245	-0.27911	0.0613442	0.215629	0.472301	-0.0758523	0.0271742	-0.290101	0.0942698
BXD16	HFD	-0.386759	0.334952	0.214762	-0.315741	-0.330299	-0.018801	0.13805	0.0595994	-0.0191787	-0.0221158	-0.292365	-0.324598	-0.11674	-0.119406	-0.223243	-0.0673836	-0.152223	0.23374	-0.209761	0.24817	0.15828	0.205641	-0.126539	0.152446	-0.237282	-0.250379	-0.0306853	-0.0105081	-0.103298	-0.0393885	-0.3188	-0.145949	-0.000162373	0.160806	0.176838	-0.205493	-0.105427	0.0728338	0.0848142
BXD27	HFD	-0.103797	0.072638	0.0528081	-0.0930285	-0.0424504	0.108472	0.0472447	0.0923448	0.0961536	0.0482368	-0.0890484	0.053554	0.0143603	0.100099	0.0306155	-0.0107254	-0.0858818	0.144441	0.0190476	-0.0392713	-0.0480265	0.0916412	-0.169562	-0.0231639	0.154478	-0.025801	0.23306	-0.0652438	-0.0906025	-0.112919	0.0764979	-0.0272926	0.296755	0.0493519	0.128655	-0.0408039	0.00959378	0.107486	-0.0263028
BXD32	HFD	-0.123761	0.191116	0.0974371	-0.0761556	-0.0895842	0.00202003	-0.0181372	0.139739	0.0312088	-0.0963087	-0.100669	-0.0805235	-0.0711412	-0.0144093	0.0904416	-0.0276609	-0.132282	-0.0913078	-0.340349	-0.123231	-0.113772	0.135037	-0.130273	-0.0915017	-0.00549683	0.0855252	0.0371996	-0.0202751	0.00741222	0.0619261	-0.0464874	0.0768918	-0.0554097	-0.0598678	0.127819	-0.203921	-0.103744	-0.187606	0.129534
BXD34	HFD	-0.041036	-0.106215	-0.0396284	0.0134163	0.00717064	0.0904839	0.133031	-0.0499946	0.0764559	0.043003	0.192709	0.0565458	0.0439453	0.123226	-0.0134442	0.0426927	0.00719582	0.111283	0.154465	0.0639641	0.0564935	0.0552078	-0.0531581	0.066449	-0.0039614	-0.0776105	-0.108652	-0.0702621	-0.0709366	0.0541208	0.0374428	-0.0513347	-0.012461	0.167802	-0.213948	0.0961565	0.0491514	-0.148155	0.186757
BXD40	HFD	-0.151118	0.0648298	0.153251	-0.162748	-0.0769701	0.0715897	0.0780082	-0.109748	-0.165771	-0.0856483	-0.159005	-0.0615981	0.00627739	0.0560944	-0.0347434	-0.095172	-0.11662	0.092156	0.106207	0.132099	0.0665337	0.101374	0.0804932	0.0399496	-0.0710358	-0.108063	0.0295307	-0.118739	-0.100783	-0.0372918	-0.0251311	-0.185296	0.123172	0.13238	-0.0169971	0.0470365	-0.0826713	0.0677254	0.00136517
BXD43	HFD	-0.0246792	0.101748	0.126914	-0.0593563	-0.0565966	-0.00995335	-0.00573633	-0.198358	0.0787989	-0.138125	-0.0584849	-0.0382991	-0.173415	-0.023574	-0.0511786	-0.085726	-0.141742	0.144284	-0.054449	0.0652333	-0.0950667	-0.00138846	0.105218	-0.182799	-0.124853	-0.105955	0.271672	-0.0839979	-0.0521956	-0.0439459	0.00303931	-0.195993	0.0943214	-0.216394	-0.0270574	0.0677889	-0.182803	0.0812367	-0.167481
BXD44	HFD	-0.0740174	0.00201491	0.0188212	-0.124872	0.00680996	0.189492	0.182788	-0.0195622	0.113921	0.103775	-0.0406463	0.149938	0.166475	0.143138	0.149776	0.00555694	-0.0505448	0.0790839	-0.105741	-0.123183	0.113857	0.0693196	0.0463412	-0.184674	0.171971	0.116011	-0.0944007	-0.101136	-0.137301	-0.149237	0.0159236	-0.0347541	-0.0121671	-0.0257886	0.118851	0.101461	-0.154399	0.150188	0.19448
BXD45	HFD	-0.0906306	-0.102756	-0.0440332	-0.0543459	-0.0456706	0.17128	0.216912	0.0288139	0.4455	0.148187	-0.00694457	0.0746866	0.00177839	0.296006	0.109405	0.0549823	-0.0130451	-0.05912	0.164589	-0.151592	0.104552	0.145917	-0.0580957	-0.0822195	0.103013	0.106775	-0.161232	0.0766436	-0.17612	-0.0363002	0.184482	-0.10269	-0.0258208	-0.0300718	-0.163287	0.143874	-0.204755	0.164161	-0.0251473
BXD48a	HFD	0.151168	-0.101615	-0.289731	0.0841697	0.0729509	0.0921764	0.125053	-0.175488	-0.0991729	0.0730833	0.11905	-0.0316672	0.185338	0.0408589	0.0359102	0.102194	0.133307	-0.151424	0.20922	0.0600746	0.261301	0.013971	0.160287	0.154192	-0.197995	0.0695307	-0.166457	-0.0932488	0.058704	0.055073	0.114199	-0.106697	-0.343276	0.0854237	-0.16607	0.284583	0.0404754	0.075595	-0.141539
BXD49	HFD	-0.134694	0.369433	0.146577	-0.0481405	-0.197889	-0.275637	-0.203275	0.0161889	-0.258413	-0.131582	0.195078	-0.348157	-0.28826	-0.256474	-0.285087	-0.0358703	-0.122037	0.150495	-0.0507521	0.0816096	-0.148479	0.089785	0.123273	0.222552	-0.323874	-0.242164	0.31154	-0.105534	0.132604	0.216257	-0.295533	0.0185749	0.0554219	0.129682	0.257637	-0.31711	0.245383	-0.287286	-0.199435
BXD50	HFD	-0.103239	0.0797863	0.0153445	-0.110985	-0.0399226	0.0507891	0.0662362	0.146914	-0.0866207	0.0654101	-0.218979	0.0877459	0.0690675	0.0208625	0.0572376	-0.0393099	-0.0191216	0.100233	0.045591	0.0619099	0.0239431	0.0963659	0.0241335	0.103667	0.175589	0.0381069	-0.0459077	-0.0836295	-0.113547	-0.105456	-0.019911	0.0602335	0.185852	0.253371	0.164931	-0.129843	0.115816	-0.205062	0.204613
BXD51	HFD	0.00121047	-0.00963158	0.0193169	0.00958356	0.0142224	0.0817653	0.00598723	0.165484	-0.0735789	0.0714686	-0.0575852	0.0729958	0.137069	0.0886911	0.139669	0.0193485	0.00229277	0.0730254	0.0235845	-0.145405	-0.0232086	0.0336081	-0.198702	-0.134951	0.205561	0.158088	0.176387	-0.0431017	-0.113052	-0.0704673	0.174431	0.144992	0.148242	-0.0229381	-0.0804668	0.0668739	-0.103857	0.0525962	-0.0699302
BXD55	HFD	0.00493659	0.0638993	0.107384	0.059428	-0.0726066	-0.146741	-0.126227	-0.0954032	0.0758845	0.0207141	0.199366	-0.218915	-0.216057	-0.108413	-0.100868	0.0416072	-0.0207927	-0.137177	-0.1329	-0.092882	-0.0294799	-0.00920752	0.127912	-0.042605	-0.216478	-0.128651	0.0356682	0.391794	0.0551885	0.164105	-0.102094	0.0431761	-0.0239582	-0.190175	0.0741792	-0.143655	-0.0352207	-0.113897	-0.115206
BXD56	HFD	0.273994	-0.244062	-0.2962	0.13375	0.343816	-0.00433073	0.0303123	-0.222843	0.252639	-0.180295	0.0758226	0.289576	-0.052911	0.102357	-0.245442	-0.1119	-0.0718607	-0.228903	-0.0963471	0.336288	-0.112217	-0.230192	0.20515	-0.164043	0.222428	-0.223761	-0.0730171	0.155864	0.0756025	-0.199173	-0.121696	-0.215564	-0.162884	-0.174413	-0.27951	0.166639	-0.0429159	-0.0996876	0.15631
BXD6	HFD	-0.102415	0.0130119	0.0258135	-0.0668145	-0.02258	0.19308	0.16395	0.177551	-0.0956765	0.0701735	-0.211145	0.0533677	0.0992009	0.142956	0.0796497	-0.0869845	-0.0814552	-0.14526	0.228616	0.0188976	0.0454778	0.206175	-0.106642	0.00810568	0.10583	-0.0248567	-0.0875821	-0.115556	-0.115542	-0.0712066	0.137144	-0.0109426	0.380598	0.166211	-0.084871	0.0847027	0.0110649	0.0638504	0.202376
BXD60	HFD	0.00908926	0.0478465	0.0795735	-0.0193978	0.0759634	-0.0543905	-0.0613219	0.0235561	-0.207078	-0.128044	-0.146084	-0.0527173	-0.0343854	-0.0482567	-0.147842	-0.0474132	-0.0703408	-0.200878	0.10638	0.236306	-0.0872024	-0.0887745	0.0216018	-0.00626743	0.0143654	-0.135716	0.0441921	-0.106138	0.0824269	-0.0920249	-0.0915322	-0.0221204	-0.08578	0.0376401	0.099586	0.018096	0.0701131	-0.215049	-0.068533
BXD61	HFD	0.127529	0.0230135	-0.231319	0.10519	0.0141121	-0.00711729	-0.0884921	0.0115358	-0.309965	0.0710197	0.106732	0.114116	0.248718	-0.199651	0.147094	0.00325518	0.101439	-0.185826	-0.254019	-0.061111	0.00804544	-0.0663153	0.0868996	0.12569	0.0560364	0.0758029	-0.179726	-0.0638171	0.0982624	-0.0149243	-0.0171556	0.0629788	-0.153117	0.232936	0.122376	0.0844356	0.201292	-0.176249	-0.171191
BXD62	HFD	0.0203234	0.0418965	-0.0696663	-0.0409229	0.030224	0.0711086	-0.00767524	-0.0911278	-0.0339018	-0.00542444	0.151653	0.0164982	0.12299	0.0274352	0.0531371	-0.0308755	-0.0602033	0.0179443	-0.0973143	-0.125827	0.0468609	-0.00553891	-0.133922	0.00845094	0.0522066	0.0439326	-0.0766977	0.148471	-0.0343841	-0.00584458	-0.0375462	-0.00324993	-0.081488	0.0737513	0.100222	0.118726	0.1394	-0.168968	0.16579
BXD63	HFD	0.120419	-0.122897	-0.192661	0.10341	0.038496	0.0767024	-0.0273322	0.0763659	-0.149115	0.0529474	0.049461	0.1156	0.152035	0.0513737	0.161333	-0.0640228	0.036334	-0.207797	0.0422475	-0.0973265	-0.00124112	-0.0715783	-0.018395	0.0355936	0.111136	0.0722438	-0.127077	-0.173291	0.0112926	-0.0326996	0.171823	0.104199	0.0281584	0.0596207	-0.0462824	0.204919	0.0790766	0.0702777	0.19636
BXD64	HFD	0.0172476	-0.151668	-0.0813828	0.11264	-0.0752057	0.0722137	0.066748	0.119931	0.0465979	0.0811301	0.0349601	0.0459772	0.181814	-0.0221634	0.032319	0.0604439	0.0957283	-0.230927	-0.0264519	0.0358763	0.100216	0.00870447	-0.208542	0.178518	0.154343	0.0314557	0.079691	0.397101	0.018376	0.0783067	-0.10786	0.0620697	-0.127725	0.2019	0.0148923	0.0733836	0.117812	0.150885	-0.0118861
BXD65	HFD	-0.0849124	0.17601	0.272944	-0.0744635	-0.0757692	-0.0781304	-0.126576	-0.0356414	-0.18076	-0.0434468	0.0266451	-0.173918	-0.233281	-0.177428	-0.0253395	-0.0321781	-0.0196974	0.263441	-0.193974	-0.0782784	-0.0552263	0.0850096	0.14022	-0.181785	-0.223362	0.0475549	0.118871	-0.153925	0.0482419	0.0457215	-0.18494	0.0391653	0.180385	-0.239655	0.204818	-0.125928	-0.192198	0.0850322	-0.212786
BXD65a	HFD	0.240251	-0.0900365	-0.102741	0.102991	0.287191	-0.185154	-0.305769	-0.0961375	-0.072671	-0.17835	-0.0328136	0.188763	0.0279631	-0.191562	0.0480328	-0.090978	0.0359207	-0.0578002	-0.20532	-0.0103749	-0.259324	-0.304603	0.15747	-0.0964192	0.0723126	0.0822433	-0.0543881	-0.0881108	0.141559	-0.144612	0.0295262	0.117939	-0.0850145	-0.175378	-0.0487475	-0.0372836	0.164167	0.161663	-0.211242
BXD66	HFD	0.0408427	0.0178942	0.244778	-0.148788	0.169299	0.0336366	-0.203456	-0.148229	-0.152598	-0.214071	-0.114565	0.130868	-0.074849	0.123029	0.111657	-0.306581	-0.252986	-0.157164	0.0451386	-0.251351	-0.261724	-0.181605	0.0718202	-0.300318	0.0886411	0.0412747	0.100239	0.119222	-0.196816	-0.272374	0.259249	-0.178501	0.164739	-0.290476	-0.030853	0.105518	-0.17893	-0.16205	-0.180286
BXD67	HFD	0.0527224	-0.0335185	0.0287449	-0.0188959	0.128075	0.0818521	-0.00480107	-0.0725387	-0.224491	0.035456	-0.0556284	0.0380366	0.110176	-0.0490932	0.109513	-0.0108564	0.0769458	0.0828838	0.00398496	-0.0223984	0.0735154	-0.0196225	0.101811	-0.0486798	-0.0529489	0.0941929	-0.0266431	-0.151814	-0.0154217	-0.00694431	0.0189763	-0.00908958	-0.0883038	0.00383458	-0.0743857	0.128385	-0.077747	-0.178223	-0.0973094
BXD68	HFD	0.113298	-0.0740705	0.0560609	-0.0946284	0.240469	-0.0064685	-0.178484	-0.209907	0.0293998	-0.241922	-0.0146462	0.164415	-0.0790501	0.0608785	0.0327535	-0.284203	-0.236182	0.0628522	0.0727122	-0.140038	-0.249018	-0.180427	-0.0184432	-0.166496	0.123649	-0.0803969	0.214406	0.224817	-0.198027	-0.282517	0.160233	-0.225152	-0.0219958	-0.0573395	-0.102792	0.140011	-0.0359161	0.103659	0.160486
BXD69	HFD	-0.0523637	0.11497	0.0488426	-0.127107	0.0389117	0.0048085	0.0660706	-0.0985799	0.0913556	-0.181032	-0.066975	-0.04156	-0.155798	0.131213	-0.177643	-0.108971	-0.184339	0.103965	0.235839	0.15777	-0.0914725	0.090059	0.155068	0.133878	-0.0801811	-0.260768	0.233763	-0.104332	-0.0644397	-0.014529	-0.00717134	-0.219932	-0.069013	0.101795	-0.0113127	0.0225375	0.0985129	0.0416163	0.141522
BXD70	HFD	0.0214425	0.0711352	0.0208592	-0.0589231	0.0802738	0.0357807	-0.0136321	-0.131541	0.121374	-0.0681938	-0.0767062	0.0491159	-0.0771911	0.123728	0.0656417	-0.105856	-0.045696	0.100709	0.114207	-0.192999	-0.067666	0.0262369	0.0942869	-0.163361	-0.0554486	0.0608813	-0.077357	-0.0488966	-0.151543	-0.0578225	0.131116	-0.0801685	0.175349	-0.227376	0.131717	0.0270861	-0.168695	0.123806	0.00554728
BXD71	HFD	-0.103083	-0.0100895	-0.00474245	-0.041564	-0.126129	0.106765	0.134889	0.0458628	0.243396	0.130836	0.0450984	-0.0122792	0.137718	0.00621098	0.0221137	0.132403	0.0301133	0.0380354	-0.117906	-0.0399045	0.199617	0.0870723	-0.106209	0.0538625	0.02863	-0.0290654	-0.126237	-0.00202238	-0.0416757	0.0226036	-0.116406	-0.0526857	-0.0717334	0.0696024	0.104912	0.128769	-0.0201862	0.121393	-0.0960235
BXD73	HFD	-0.141054	0.055487	0.0981405	-0.115659	-0.0728311	0.102927	0.122294	-0.00444044	-0.0130089	0.153157	-6.61406e-05	0.00854972	0.000320762	-0.013557	0.0488781	0.0686021	0.0761687	0.153082	0.0910489	-0.00672389	0.15066	0.141617	-0.0288855	-0.106964	-0.0185011	0.00286471	-0.133569	0.0121348	-0.0599833	-0.03159	-0.0519954	-0.0402346	0.263584	-0.023795	0.118535	-0.0650046	-0.185346	0.110377	0.186767
BXD73a	HFD	-0.00175898	-0.0569604	-0.0581633	-0.0214453	0.0758155	0.183746	0.073505	-0.059619	0.0874201	0.0654921	0.0303315	0.128576	0.0525956	0.146113	0.151461	-0.0269456	-0.0430729	0.00869132	-0.0501208	-0.173245	0.0362443	0.070379	-0.234208	-0.156156	0.17087	0.0915564	-0.112221	0.22468	-0.114029	-0.0643098	0.00122726	0.00887824	-0.0210979	-0.119349	0.0166158	0.137032	-0.155033	0.192341	0.175318
BXD73b	HFD	0.00672249	-0.14427	-0.111647	0.210385	-0.111948	-0.114364	0.122883	0.29044	-0.100505	0.252465	0.0353943	-0.0770646	0.0495194	-0.176849	-0.178119	0.334478	0.315196	0.0430182	0.0781007	0.356074	0.241677	-0.00145346	-0.0605457	0.308105	-0.0549139	-0.0477917	-0.1555	0.104989	0.297143	0.28585	-0.242308	0.270867	0.0752789	0.240151	-0.145136	-0.208162	0.224992	0.125203	0.234641
BXD75	HFD	0.0359731	-0.151455	0.132	0.0699341	0.00439008	0.0283058	0.0725741	-0.138954	0.10969	0.049261	-0.0702766	0.00116629	0.0694292	0.155788	-0.0183019	0.0631146	0.0549957	-0.187795	0.128312	0.122237	0.105684	0.00838564	-0.19375	-0.0259621	0.0275065	-0.0937883	-0.0596563	-0.0899008	0.0157236	0.0415329	0.177461	-0.107413	0.102112	-0.0753361	-0.201382	0.172001	-0.0407248	0.0915197	-0.0778076
BXD79	HFD	0.0608471	-0.0518321	0.189911	-0.148789	0.231779	0.0294911	-0.104437	-0.215414	0.0180781	-0.241532	-0.163042	0.19871	-0.0764796	0.00170237	0.0742201	-0.256362	-0.120659	0.16275	-0.168828	-0.160808	-0.222672	-0.17438	0.0694566	-0.211239	0.111137	-0.000942658	-0.0359296	-0.0842927	-0.142769	-0.225045	-0.0519719	-0.173151	0.141147	-0.155569	-0.0616229	0.0762288	0.0259653	-0.188257	0.135098
BXD8	HFD	-0.271659	0.171925	0.158761	-0.155194	-0.263548	0.0856414	0.171005	0.0921297	-0.129367	0.136691	-0.0697056	-0.277342	-0.0706799	-0.0497014	0.025619	0.090745	0.0138649	0.20754	-0.15336	0.040625	0.244747	0.25613	-0.217467	-0.0657356	-0.149061	0.23775	0.0361506	-0.0437148	-0.0452249	0.0976915	-0.163924	0.0354089	-0.0101378	-0.00743763	0.0849752	-0.0730755	-0.326802	0.10186	-0.146795
BXD81	HFD	0.0177833	-0.0337322	-0.0971274	0.0455751	0.00504608	0.0394047	-0.00320391	0.110529	0.00788948	0.147924	-0.019903	0.0558372	0.0730225	0.067198	0.110522	0.0688162	0.0837401	0.0164918	0.000962521	-0.104225	0.00922622	0.0625671	0.0299029	-0.00565662	0.093477	0.0893353	-0.123359	0.200763	0.0608697	-0.00543347	0.139458	0.143375	0.0824396	0.0142953	0.0268482	-0.0307597	0.0434763	-0.148701	-0.129903
BXD83	HFD	0.0245177	0.00792545	-0.0135601	0.0673794	-0.0533197	0.0139796	-0.00686694	0.0152221	-0.124596	0.0349388	0.127908	-0.0109469	0.107733	0.141226	0.0554691	0.0512905	-0.00966401	-0.214717	0.280481	-0.0188929	0.00826635	0.00569576	-0.23203	0.116984	0.0421451	-0.0252564	-0.0619311	-0.113981	0.0422958	0.109721	0.1913	0.0460596	-0.0827428	0.0759984	0.0755255	0.148973	0.11326	-0.168881	-0.149056
BXD84	HFD	0.0147958	0.0491538	0.00706895	0.0474941	-0.0261554	-0.0990686	-0.109085	0.00809222	0.154141	-0.0402388	0.178328	-0.0186018	-0.101921	0.0763423	-0.0441977	-0.00160299	-0.048832	-0.18675	0.070064	-0.131008	-0.126622	-0.0937466	-0.0389898	-0.0925746	0.0694964	-0.0135144	0.187404	-0.0176198	0.0048276	0.0154635	0.16123	0.10175	0.0441341	-0.164863	0.102559	-0.0595714	-0.0107383	-0.124748	-0.13971
BXD85	HFD	0.0508256	-0.123896	-0.0468853	0.160909	-0.124291	-0.130172	-0.0057458	0.142954	-0.00150808	0.133857	0.163077	-0.139913	-0.0183248	-0.0897468	-0.215612	0.185904	0.105227	-0.0115107	0.144587	0.249621	0.0579614	-0.0802561	-0.050822	0.307948	-0.0666144	-0.186288	-0.0967181	0.102534	0.237905	0.20789	-0.202297	0.134232	-0.13258	0.190503	-0.112709	-0.0924787	0.244707	0.100463	-0.0989111
BXD87	HFD	0.13136	-0.180249	-0.251895	0.28262	-0.093327	-0.117518	-0.0138592	0.183165	0.145491	0.151584	0.333428	-0.0901764	-0.0319518	0.015968	-0.0660488	0.295557	0.206013	-0.100025	0.0985449	-0.00562032	-0.00298172	-0.0619295	-0.0381872	0.165487	0.0081826	0.104227	-0.129801	-0.00941226	0.212169	0.275201	0.0194365	0.271795	-0.162463	-0.039463	-0.248155	-0.0633307	0.129351	-0.18026	0.114041
BXD89	HFD	0.169924	-0.24082	-0.199121	0.44339	-0.149759	-0.353081	-0.148012	0.337736	0.132375	0.253574	0.348951	-0.249976	-0.111773	-0.377246	-0.26851	0.461425	0.468701	-0.0867358	-0.117054	0.295962	0.145498	-0.194218	-0.119081	0.216713	-0.208032	0.319582	-0.0265601	0.0852881	0.455668	0.457128	-0.240871	0.460543	-0.227292	-0.186324	-0.230949	-0.380987	0.107683	-0.00513426	-0.174724
BXD90	HFD	0.0341315	-0.143658	-0.0361054	0.113801	0.00521949	0.0240988	0.0679159	0.159838	0.0887081	0.113404	-0.0667871	0.0217237	0.14599	0.056549	0.17878	0.104874	0.184784	0.0398461	0.0710054	-0.105416	0.0969214	-0.0377551	-0.206462	-0.0604751	0.0825656	0.238029	-0.139652	-0.0790608	0.0629408	0.0879172	0.187676	0.188274	-0.0478016	-0.110721	-0.102878	0.034945	-0.0728456	0.158168	-0.188735
BXD95	HFD	0.0660135	-0.157466	-0.307509	0.0554942	0.0780923	0.217454	0.201403	0.213066	-0.133795	0.265493	-0.07671	0.224846	0.373831	-0.000157601	0.332942	0.165826	0.284062	-0.183165	-0.171867	-0.107485	0.264118	0.0974445	-0.0313346	-0.0595577	0.23655	0.298113	-0.215541	-0.0668258	0.0194254	-0.0710989	0.0882492	0.172898	0.0869293	0.108901	-0.0732064	0.121887	-0.149459	0.170873	-0.0667693
BXD98	HFD	0.31412	-0.10819	0.106326	0.133254	0.35721	-0.379711	-0.362555	-0.36073	0.0920045	-0.28586	-0.0731501	0.159111	-0.257588	-0.341282	-0.173047	-0.207482	0.125647	0.164881	-0.268303	0.0704102	-0.295061	-0.348919	0.324635	-0.0988907	-0.222355	-0.0969656	0.00260083	-0.0818937	0.221544	-0.122391	-0.133523	-0.0872677	-0.0688464	-0.158025	-0.0921746	-0.231781	0.183369	0.0431517	0.0112576
BXD99	HFD	0.190958	0.00329065	0.0417691	0.213301	-0.00283232	-0.362557	-0.278329	-0.142006	0.0787113	-0.239486	0.29877	-0.210541	-0.335208	-0.31459	-0.383005	0.057797	0.022288	0.111671	-0.057345	0.163677	-0.221916	-0.258812	0.285102	0.288944	-0.249339	-0.336139	0.0407905	0.42323	0.246093	0.282282	-0.179642	-0.0579656	-0.169484	-0.00273278	0.0206858	-0.267163	0.333932	-0.133295	0.0587284

## Sheet: colon_CD_modules
Gene name	Modules
Gm11555	CD_M1
Gm8906	CD_M1
Defb39	CD_M1
Gm14180	CD_M1
Gm8897	CD_M1
Gm6460	CD_M1
Gm8922	CD_M1
Vmn1r48	CD_M1
Speer4d	CD_M1
Krtap5-1	CD_M1
Gm4553	CD_M1
D830039M14Rik	CD_M1
Gm8890	CD_M1
Gm11596	CD_M1
LOC100504451	CD_M1
Gm2745	CD_M1
Krtap4-9	CD_M1
Cyp3a25	CD_M1
Olfr460	CD_M1
Gm21750	CD_M1
Sprr2k	CD_M1
Defb10	CD_M1
Gm8926	CD_M1
Speer1	CD_M1
Gm5174	CD_M1
Zscan18	CD_M1
Gm8879	CD_M1
Srsx	CD_M1
Sel1l2	CD_M1
Krtap10-10	CD_M1
Krtap9-1	CD_M1
Pip5kl1	CD_M1
Vpreb2	CD_M1
Vmn1r175	CD_M1
Slfn9	CD_M1
Gm21886	CD_M1
Gm7969	CD_M1
LOC100504460	CD_M1
Wfdc11	CD_M1
Gm10153	CD_M1
Lce1a1	CD_M1
Olfm5	CD_M1
Krtap5-4	CD_M1
Olfr368	CD_M1
Olfr1	CD_M1
Gm9969	CD_M1
Gm5861	CD_M1
St6galnac1	CD_M1
Krtap5-2	CD_M1
Gm4791	CD_M1
Gm6455	CD_M1
H2-M5	CD_M1
Fam19a1	CD_M1
Olfr1264	CD_M1
Gm10674	CD_M1
Olfr101	CD_M1
Olfr492	CD_M1
Gm11564	CD_M1
Trpm1	CD_M1
Tmem52b	CD_M1
Speer4a	CD_M1
Olfr1393	CD_M1
Olfr771	CD_M1
Kif4-ps	CD_M1
Foxr2	CD_M1
Gm6309	CD_M1
Gm10592	CD_M1
Gm21968	CD_M1
Cd209e	CD_M1
Olfr295	CD_M1
Olfr170	CD_M1
Keg1	CD_M1
Cbarp	CD_M1
Arhgef6	CD_M1
Gm8871	CD_M1
Hephl1	CD_M1
Zp1	CD_M1
Csprs	CD_M1
Gm1979	CD_M1
Olfr1339	CD_M1
Dusp5	CD_M1
Htr1d	CD_M1
Krtap1-5	CD_M1
Olfr471	CD_M1
Gm5927	CD_M1
Gm904	CD_M1
Gm21897	CD_M1
Clec4e	CD_M1
Grm2	CD_M1
Gata5os	CD_M1
Gm11060	CD_M1
Olfr282	CD_M1
Olfr329-ps	CD_M1
Lelp1	CD_M1
Gm17714	CD_M1
Ptcra	CD_M1
Gm21962	CD_M1
Gm9340	CD_M1
Lce1j	CD_M1
Gm9327	CD_M1
Slc15a5	CD_M1
Gm21833	CD_M1
Olfr663	CD_M1
Slc30a8	CD_M1
Gm11562	CD_M1
Olfr285	CD_M1
Nptn	CD_M1
Lce1b	CD_M1
Gm14501	CD_M1
Gm2391	CD_M1
Klk13	CD_M1
LOC100504180	CD_M1
Lce1h	CD_M1
Rhox2a	CD_M1
Igfn1	CD_M1
Gm17467	CD_M1
Gm17577	CD_M1
Zdhhc22	CD_M1
Olfr807	CD_M1
Qprt	CD_M1
Mrgpra2b	CD_M1
Lce1c	CD_M1
Fezf2	CD_M1
Gm14476	CD_M1
Gm14479	CD_M1
Gm14482	CD_M1
Gm14483	CD_M1
Cyp7a1	CD_M1
Defb11	CD_M1
Chst8	CD_M1
Wnt7a	CD_M1
Nphs1	CD_M1
Tmod1	CD_M1
Prss33	CD_M1
Gp9	CD_M1
Gm19956	CD_M1
E130012A19Rik	CD_M1
Olfr923	CD_M1
Gm8325	CD_M1
Olfr102	CD_M1
Hsd3b6	CD_M1
Fam163b	CD_M1
Gm3409	CD_M1
Tmem72	CD_M1
Gm7714	CD_M1
Slc22a13b-ps	CD_M1
Gm8700	CD_M1
Gm4559	CD_M1
Olfr1411	CD_M1
Olfr763	CD_M1
Gm14477	CD_M1
Agr3	CD_M1
Gm11595	CD_M1
Nr6a1	CD_M1
Rhox3g	CD_M1
T	CD_M1
Olfr701	CD_M1
Gm10217	CD_M1
Best1	CD_M1
Ptprt	CD_M1
Fosl1	CD_M1
Crygf	CD_M1
Gm10619	CD_M1
Gm17421	CD_M1
C130050O18Rik	CD_M1
Olfr1362	CD_M1
Olfr544	CD_M1
Gm21616	CD_M1
Gm906	CD_M1
Kcnk4	CD_M1
Ninl	CD_M1
Cldn34a	CD_M1
Ipw	CD_M1
Oprd1	CD_M1
Fam205a2	CD_M1
Ribc2	CD_M1
Gm17297	CD_M1
Gm17679	CD_M1
LOC100862269	CD_M1
Gm3415	CD_M1
Hpcal4	CD_M1
4930512B01Rik	CD_M1
Unc93a	CD_M1
1700018B08Rik	CD_M1
Gm10595	CD_M1
Gm21966	CD_M1
Gm11042	CD_M1
4932427H20Rik	CD_M1
4931429I11Rik	CD_M1
G530012D18Rik	CD_M1
Gm19402	CD_M1
Fam19a2	CD_M1
Olfr982	CD_M1
Plpp7	CD_M1
Phrf1	CD_M1
4930449I24Rik	CD_M1
Sprr1b	CD_M1
1700012L04Rik	CD_M1
Kcnn1	CD_M1
Olfr1010	CD_M1
Vmn1r217	CD_M1
Fmo3	CD_M1
Gm17469	CD_M1
Gm17693	CD_M1
Gm17268	CD_M1
Omp	CD_M1
Cdhr4	CD_M1
Fut7	CD_M1
Rsph4a	CD_M1
Cyb5rl	CD_M1
Tm4sf19	CD_M1
Eya1	CD_M1
Gm6370	CD_M1
Mcpt1	CD_M1
Nrip2	CD_M1
Alox12b	CD_M1
Lrfn2	CD_M1
Gjb2	CD_M1
Olfr1329	CD_M1
Gm3443	CD_M1
Tcstv1	CD_M1
D930048N14Rik	CD_M1
Gm3402	CD_M1
Krtap4-7	CD_M1
Ift80	CD_M1
Gm960	CD_M1
Gm14151	CD_M1
Tmem89	CD_M1
2310016G11Rik	CD_M1
Dpcr1	CD_M1
Krt83	CD_M1
Mrgpre	CD_M1
Olfr146	CD_M1
Olfr228	CD_M1
Rimkla	CD_M1
Odam	CD_M1
Gm8765	CD_M1
Olfr1356	CD_M1
LOC100861707	CD_M1
Aoah	CD_M1
Gm10600	CD_M1
Smn1	CD_M1
Orm2	CD_M1
Oxgr1	CD_M1
Gm17584	CD_M1
Ankrd61	CD_M1
Mrgprg	CD_M1
Krtap10-4	CD_M1
Gm3893	CD_M1
Spin2g	CD_M1
LOC100502805	CD_M1
Scgb1b20	CD_M1
Rtn4rl2	CD_M1
Aire	CD_M1
Dusp14	CD_M1
Olfr406	CD_M1
Nckipsd	CD_M1
Zfp341	CD_M1
Gm5152	CD_M1
Nr4a3	CD_M1
Olfr374	CD_M1
Olfr491	CD_M1
Pom121l2	CD_M1
Ssu2	CD_M1
Dsg1b	CD_M1
Spata3	CD_M1
Spin2e	CD_M1
Olfr1229	CD_M1
Gm9837	CD_M1
Cyp2a5	CD_M1
4931440F15Rik	CD_M1
Lmo2	CD_M1
Mup-ps19	CD_M1
Pcdh17	CD_M1
Lrrc18	CD_M1
Flg	CD_M1
Olfr681	CD_M1
Nyx	CD_M1
Sbp	CD_M1
Fam151a	CD_M1
Gm10324	CD_M1
Zfp444	CD_M1
Fank1	CD_M1
Gm17542	CD_M1
Olfr3	CD_M1
Catsper1	CD_M1
Zfp354c	CD_M1
Gm16686	CD_M1
BC048609	CD_M1
Olfr176	CD_M1
Gm9507	CD_M1
Gm19924	CD_M1
Nup210l	CD_M1
Zscan30	CD_M1
Il5	CD_M1
Gm3831	CD_M1
3110040M04Rik	CD_M1
Gm572	CD_M1
Gm2749	CD_M1
Gm10142	CD_M1
Slc24a1	CD_M1
Wfdc13	CD_M1
Atxn7l3	CD_M1
4930469G21Rik	CD_M1
Bmp1	CD_M1
Gm7138	CD_M1
Wap	CD_M1
Samd15	CD_M1
Gm3233	CD_M1
Gm3476	CD_M1
Hcrt	CD_M1
Gm21637	CD_M1
Efcab11	CD_M1
Pdyn	CD_M1
Klrb1c	CD_M1
4933414I15Rik	CD_M1
Pomgnt2	CD_M1
Pla2g5	CD_M1
Ubiad1	CD_M1
Plekhm1	CD_M1
Hcar2	CD_M1
Anxa9	CD_M1
Gm11559	CD_M1
Tsga8	CD_M1
Obox5	CD_M1
Btc	CD_M1
Otop3	CD_M1
Ceacam19	CD_M1
Ghrh	CD_M1
Ms4a10	CD_M1
Gm2310	CD_M1
Zbtb39	CD_M1
Wdsub1	CD_M1
Olfr385	CD_M1
Zscan25	CD_M1
Gpsm1	CD_M1
Dusp13	CD_M1
Reg3b	CD_M1
Slc22a17	CD_M1
Ceacam15	CD_M1
Fam205a1	CD_M1
Olfr411	CD_M1
Olfr239	CD_M1
Slc6a20a	CD_M1
Ube2d2b	CD_M1
Prr33	CD_M1
Vmn1r209	CD_M1
Defb6	CD_M1
Igdcc3	CD_M1
Klf8	CD_M1
Accsl	CD_M1
Tdrd12	CD_M1
Sprr4	CD_M1
Tex40	CD_M1
Rlbp1	CD_M1
Il13	CD_M1
Gata1	CD_M1
Alk	CD_M1
Olfr324	CD_M1
Ear1	CD_M1
Nr2f1	CD_M1
Arhgef25	CD_M1
Gm2916	CD_M1
Gm5148	CD_M1
Gm8672	CD_M1
Olfr137	CD_M1
Vgll2	CD_M1
Kprp	CD_M1
Hsd3b1	CD_M1
Dux	CD_M1
Adamtsl4	CD_M1
Pnpla1	CD_M1
Efcab8	CD_M1
Acr	CD_M1
Col12a1	CD_M1
Ngf	CD_M1
Olfr147	CD_M1
4732456N10Rik	CD_M1
9230112D13Rik	CD_M1
Gm4027	CD_M1
Olfr1348	CD_M1
Tex29	CD_M1
Tnfsf14	CD_M1
Fcnb	CD_M1
R3hdml	CD_M1
Gm17449	CD_M1
Dcst2	CD_M1
Csf3r	CD_M1
Smlr1	CD_M1
BC117090	CD_M1
Krtap4-16	CD_M1
Lmtk3	CD_M1
Vmn1r188	CD_M1
Cplx3	CD_M1
Hoxd1	CD_M1
Frem1	CD_M1
Olfr638	CD_M1
A830082N09Rik	CD_M1
Hamp2	CD_M1
Scgb2b26	CD_M1
Zbtb7c	CD_M1
Olfr434	CD_M1
Lcn9	CD_M1
Zic1	CD_M1
BC106179	CD_M1
Olfr1030	CD_M1
Gip	CD_M1
Prss51	CD_M1
Olfr284	CD_M1
Ctf1	CD_M1
Leap2	CD_M1
Olfr692	CD_M1
Cxcr5	CD_M1
Cphx1	CD_M1
Zscan4b	CD_M1
Gsg1	CD_M1
Lyzl4	CD_M1
Gm7056	CD_M1
Mical3	CD_M1
Chrne	CD_M1
Tmem217	CD_M1
Igfl3	CD_M1
Cd164l2	CD_M1
Kl	CD_M1
Gm13298	CD_M1
Ssxb5	CD_M1
Gng4	CD_M1
Gm3404	CD_M1
Ramp3	CD_M1
Tha1	CD_M1
Gm9992	CD_M1
S1pr5	CD_M1
Ms4a15	CD_M1
Slc5a4b	CD_M1
Prok2	CD_M1
Gm11360	CD_M1
Gpr6	CD_M1
Tdrd1	CD_M1
4933402N03Rik	CD_M1
Gm8206	CD_M1
S100a5	CD_M1
Neu2	CD_M1
Olfr129	CD_M1
Cryaa	CD_M1
Pex11g	CD_M1
1700003E24Rik	CD_M1
Krt39	CD_M1
Olfr697	CD_M1
Olfr1423	CD_M1
Epx	CD_M1
Ces3a	CD_M1
Tmem69	CD_M1
Gm11939	CD_M1
Olfr470	CD_M1
Adora2b	CD_M1
2310015B20Rik	CD_M1
Csn1s2a	CD_M1
Gm12394	CD_M1
Slc6a2	CD_M1
Iqcd	CD_M1
Ntsr2	CD_M1
Pnpla7	CD_M1
Wnt10a	CD_M1
Hsd3b4	CD_M1
4930578G10Rik	CD_M1
Gabbr2	CD_M1
Olfr623	CD_M1
Olfr1249	CD_M1
BC107364	CD_M1
Olfr367-ps	CD_M1
Gpr45	CD_M1
Gm21954	CD_M1
Urm1	CD_M1
Bpifb5	CD_M1
Htr2a	CD_M1
Zfp142	CD_M1
Aox3	CD_M1
Gm14474	CD_M1
Coil	CD_M1
Btbd17	CD_M1
Slc22a12	CD_M1
Tmem132b	CD_M1
4930504O13Rik	CD_M1
Gm7137	CD_M1
Olfr30	CD_M1
C6	CD_M1
Olfr167	CD_M1
6430550D23Rik	CD_M1
Fzd3	CD_M1
Tas1r2	CD_M1
Catsperg2	CD_M1
Krtap4-13	CD_M1
Nupr1l	CD_M1
Zfp11	CD_M1
Adora2a	CD_M1
Ppp1r1c	CD_M1
Ifnl3	CD_M1
Ly6f	CD_M1
Olfr522	CD_M1
Cabp2	CD_M1
H2-M10.5	CD_M1
Smok3b	CD_M1
Fam69b	CD_M1
Gm7385	CD_M1
Loxl4	CD_M1
Vmn1r214	CD_M1
Dusp26	CD_M1
Cdsn	CD_M1
Tcf7l1	CD_M1
Olfr433	CD_M1
Muc20	CD_M1
Slc46a2	CD_M1
F13b	CD_M1
Tmem213	CD_M1
Espnl	CD_M1
Bpifb9a	CD_M1
Ankrd35	CD_M1
Svopl	CD_M1
Gm7337	CD_M1
Mblac1	CD_M1
Lipc	CD_M1
Zfp423	CD_M1
Ttf1	CD_M1
Olfr283	CD_M1
Pde10a	CD_M1
Fzd9	CD_M1
Phf21b	CD_M1
Olfr12	CD_M1
Defb45	CD_M1
Oas1f	CD_M1
Aqp12	CD_M1
Lhx8	CD_M1
Myo1f	CD_M1
Fcrls	CD_M1
Gm2518	CD_M1
Gm5444	CD_M1
Gjb5	CD_M1
C2cd4a	CD_M1
Ankrd45	CD_M1
Cdh8	CD_M1
D430041D05Rik	CD_M1
Itpripl1	CD_M1
Gpr157	CD_M1
Gm13941	CD_M1
Cav3	CD_M1
Catsper4	CD_M1
Xcl1	CD_M1
Calml3	CD_M1
Ssxb1	CD_M1
Olfr1342	CD_M1
P4ha3	CD_M1
3830408C21Rik	CD_M1
Gpha2	CD_M1
2010001E11Rik	CD_M1
Wipf1	CD_M1
Fam187b	CD_M1
Krtap1-4	CD_M1
Lrit1	CD_M1
Tgif2	CD_M1
Olfr1232	CD_M1
4933406M09Rik	CD_M1
Meis3	CD_M1
A430078G23Rik	CD_M1
Ccdc78	CD_M1
Orm1	CD_M1
Gm11733	CD_M1
Map3k12	CD_M1
Cckar	CD_M1
Spag8	CD_M1
F2rl3	CD_M1
Gm2012	CD_M1
Tmsb15b2	CD_M1
Celsr3	CD_M1
Gm3250	CD_M1
Slc12a1	CD_M1
Slc39a13	CD_M1
Tulp4	CD_M1
Doxl2	CD_M1
Lgr5	CD_M1
Ly6g5c	CD_M1
Plppr3	CD_M1
Chrdl2	CD_M1
1700019G17Rik	CD_M1
Gm10181	CD_M1
Gm9736	CD_M1
Olfr330	CD_M1
Cox6a2	CD_M1
Nxph1	CD_M1
Gm16181	CD_M1
Tmem233	CD_M1
Prap1	CD_M1
Nebl	CD_M1
Crabp2	CD_M1
Whrn	CD_M1
Krtap4-2	CD_M1
Cd207	CD_M1
Gm17695	CD_M1
Gm10597	CD_M1
Fam101a	CD_M1
Nckap5l	CD_M1
Bsph2	CD_M1
Sstr5	CD_M1
Enthd1	CD_M1
Piwil2	CD_M1
Gm10845	CD_M1
Rho	CD_M1
Olfr769	CD_M1
Cacng3	CD_M1
Xkr6	CD_M1
Mospd4	CD_M1
Prr5l	CD_M1
Olfr1215	CD_M1
Olfr19	CD_M1
Olfr1102	CD_M1
Dchs1	CD_M1
Siglec15	CD_M1
Treml1	CD_M1
Krtap9-5	CD_M1
Rab26	CD_M1
Olfr50	CD_M1
Wfdc6b	CD_M1
Gm10283	CD_M1
Sbpl	CD_M1
Olfr1089	CD_M1
Scgb1a1	CD_M1
Dmrtc2	CD_M1
Fam198a	CD_M1
Fam221b	CD_M1
Olfr1466	CD_M1
Frmd6	CD_M1
Gm8113	CD_M1
Osbpl10	CD_M1
4930529C04Rik	CD_M1
Ccdc134	CD_M1
Olfr1301	CD_M1
Krt86	CD_M1
Gm17651	CD_M1
Gm20026	CD_M1
Dnah11	CD_M1
Zfp648	CD_M1
Gm5640	CD_M1
4931429L15Rik	CD_M1
Rbm20	CD_M1
Mfsd10	CD_M1
Rab40b	CD_M1
Tssk3	CD_M1
Bcat1	CD_M1
Gpr119	CD_M1
Ooep	CD_M1
Enam	CD_M1
Krtap5-3	CD_M1
Acox2	CD_M1
Ntrk1	CD_M1
Gm14459	CD_M1
4732471J01Rik	CD_M1
4930447C04Rik	CD_M1
Hmga2	CD_M1
Pfkfb1	CD_M1
Vstm2a	CD_M1
Catip	CD_M1
Pou6f2	CD_M1
Olfr384	CD_M1
Gm5936	CD_M1
Crybb2	CD_M1
Pkdrej	CD_M1
Slc4a5	CD_M1
Olfr724	CD_M1
Ccdc54	CD_M1
Pacrg	CD_M1
EU599041	CD_M1
Slc8a2	CD_M1
Lingo1	CD_M1
Gm8074	CD_M1
Serpinb6d	CD_M1
Wfdc9	CD_M1
Olfr958	CD_M1
1700018F24Rik	CD_M1
Olfr1412	CD_M1
Trim63	CD_M1
Lcn10	CD_M1
Tas2r114	CD_M1
Spink11	CD_M1
Gm1995	CD_M1
Cntnap4	CD_M1
Ak7	CD_M1
Pcsk6	CD_M1
Grin2d	CD_M1
Myh1	CD_M1
Mc1r	CD_M1
Map1s	CD_M1
Cacng8	CD_M1
BC065397	CD_M1
Pp2d1	CD_M1
Dkk3	CD_M1
Ghsr	CD_M1
Gsdma2	CD_M1
Gm10912	CD_M1
Dct	CD_M1
Glp1r	CD_M1
Trem3	CD_M1
Clec4b2	CD_M1
Gins3	CD_M1
Vmn1r7	CD_M1
Wdr89	CD_M1
Gm11938	CD_M1
Zfp488	CD_M1
Tll2	CD_M1
Vmn1r36	CD_M1
A830010M20Rik	CD_M1
Necap2	CD_M1
Rrp1b	CD_M1
Ccdc108	CD_M1
Ms4a4d	CD_M1
Sdk2	CD_M1
Gm281	CD_M1
Crygd	CD_M1
Prkcd	CD_M1
Synb	CD_M1
Gm21956	CD_M1
Cmtm5	CD_M1
Cyp17a1	CD_M1
Hcar1	CD_M1
Slc26a9	CD_M1
BC048671	CD_M1
1700084M14Rik	CD_M1
Klk1b16	CD_M1
Tex38	CD_M1
Unk	CD_M1
Bloc1s3	CD_M1
Masp1	CD_M1
Blm	CD_M1
Gpr75	CD_M1
Asic4	CD_M1
Fam71e2	CD_M1
Actl10	CD_M1
Mrgpra3	CD_M1
Ager	CD_M1
Ntm	CD_M1
Lrrc3c	CD_M1
Dlx1	CD_M1
4933409K07Rik	CD_M1
Fbxl13	CD_M1
Olfr1066	CD_M1
Apol7b	CD_M1
Cabp4	CD_M1
Shisa9	CD_M1
Fosb	CD_M1
Cox4i2	CD_M1
Gm5893	CD_M1
Efcab6	CD_M1
Mdga2	CD_M1
Aurkc	CD_M1
Fam57b	CD_M1
Tenm3	CD_M1
Cox8c	CD_M1
Ackr2	CD_M1
Sardh	CD_M1
6030468B19Rik	CD_M1
Tgm1	CD_M1
Dok7	CD_M1
5830411N06Rik	CD_M1
4930519P11Rik	CD_M1
Prom2	CD_M1
Rasl10a	CD_M1
Gm8096	CD_M1
Btla	CD_M1
Tmod4	CD_M1
Krtap31-2	CD_M1
Icam1	CD_M1
Syngr1	CD_M1
Usp2	CD_M1
Olfr155	CD_M1
3930402G23Rik	CD_M1
Pomt2	CD_M1
Dlk2	CD_M1
Ptafr	CD_M1
Svs3b	CD_M1
Myh4	CD_M1
Carns1	CD_M1
Marco	CD_M1
4930595D18Rik	CD_M1
9830107B12Rik	CD_M1
BC030500	CD_M1
Klk1b1	CD_M1
Hfe2	CD_M1
Mas1	CD_M1
Dcst1	CD_M1
Gm6583	CD_M1
Serpina6	CD_M1
Zfp703	CD_M1
Serpinf1	CD_M1
Kctd21	CD_M1
Foxr1	CD_M1
Olfr319	CD_M1
Rab7b	CD_M1
A930017K11Rik	CD_M1
Olfr222	CD_M1
Pglyrp4	CD_M1
Wfdc5	CD_M1
Grin3b	CD_M1
Cldn18	CD_M1
Hk3	CD_M1
LOC100503047	CD_M1
Chrm1	CD_M1
Gnb3	CD_M1
Mex3d	CD_M1
Olfr1143	CD_M1
Npy5r	CD_M1
H2-M10.2	CD_M1
Mrap	CD_M1
Grap	CD_M1
Gm3045	CD_M1
Dnmt3a	CD_M1
Syna	CD_M1
Scgb1b24	CD_M1
Cby3	CD_M1
Wfdc10	CD_M1
Spink14	CD_M1
Olfr243	CD_M1
Slc35g3	CD_M1
Olfr535	CD_M1
Asb1	CD_M1
Braf	CD_M1
Glrp1	CD_M1
Lep	CD_M1
Gpr139	CD_M1
Bbs1	CD_M1
Gm10046	CD_M1
Sfi1	CD_M1
Ifnl2	CD_M1
F2	CD_M1
Myl4	CD_M1
Radil	CD_M1
Spint4	CD_M1
C330021F23Rik	CD_M1
Sstr4	CD_M1
Slc27a2	CD_M1
Gpr3	CD_M1
Olfr309	CD_M1
Gm20731	CD_M1
Prm3	CD_M1
Olfr805	CD_M1
9230106D20Rik	CD_M1
Olfr1085	CD_M1
Vegfa	CD_M1
Mthfr	CD_M1
A530099J19Rik	CD_M1
Adamts14	CD_M1
Thsd7b	CD_M1
Olfr767	CD_M1
LOC100861606	CD_M1
Lim2	CD_M1
Cryga	CD_M1
Vtcn1	CD_M1
Olfr1280	CD_M1
Ydjc	CD_M1
Mrgprf	CD_M1
Chil1	CD_M1
Sostdc1	CD_M1
Nid2	CD_M1
Acpt	CD_M1
F830016B08Rik	CD_M1
Olfr1256	CD_M1
Zfp773	CD_M1
Serpinb7	CD_M1
Defb30	CD_M1
Dpysl4	CD_M1
Gm9639	CD_M1
Gpr4	CD_M1
Spata22	CD_M1
Notch3	CD_M1
Cyp2c37	CD_M1
Casr	CD_M1
S1pr2	CD_M1
Krt42	CD_M1
Uroc1	CD_M1
Cd248	CD_M1
Mir339	CD_M1
Fnd3c2	CD_M1
D630041G03Rik	CD_M1
Sprn	CD_M1
Tmem132c	CD_M1
Zscan20	CD_M1
Olfr618	CD_M1
Nr0b2	CD_M1
Cacna2d4	CD_M1
Cdk3-ps	CD_M1
Plxnc1	CD_M1
Adgrf3	CD_M1
Olfr148	CD_M1
Gm11077	CD_M1
Gm15440	CD_M1
Aldh1a3	CD_M1
Prrt1	CD_M1
Olfr1188	CD_M1
Bex1	CD_M1
Zbtb3	CD_M1
Grhl1	CD_M1
Zfr2	CD_M1
1700007K13Rik	CD_M1
Ftcd	CD_M1
Aasdh	CD_M1
Esyt3	CD_M1
Psg20	CD_M1
Gm3238	CD_M1
Vmn1r234	CD_M1
Pilrb1	CD_M1
Smok2a	CD_M1
Zar1	CD_M1
Dmxl2	CD_M1
Nanog	CD_M1
Gm12790	CD_M1
Lrp1b	CD_M1
Spata32	CD_M1
Egfl7	CD_M1
Fam47e	CD_M1
Lrp3	CD_M1
Gm14406	CD_M1
Gm14444	CD_M1
Serpina3a	CD_M1
Gm7104	CD_M1
Slc39a14	CD_M1
Gm16499	CD_M1
Itih3	CD_M1
Myo7a	CD_M1
Spata31	CD_M1
Olfr44	CD_M1
Plppr1	CD_M1
Cndp1	CD_M1
Glis1	CD_M1
Scara3	CD_M1
Ldlrad1	CD_M1
Olfr1389	CD_M1
1700092M07Rik	CD_M1
Spatc1	CD_M1
D630045J12Rik	CD_M1
Nphp4	CD_M1
Myl2	CD_M1
Plscr3	CD_M1
3425401B19Rik	CD_M1
Krt10	CD_M1
Svs1	CD_M1
Gm17673	CD_M1
Barx1	CD_M1
Gm16253	CD_M1
Ccdc171	CD_M1
Ccl2	CD_M1
Tlr11	CD_M1
Tas1r3	CD_M1
Smok3c	CD_M1
Gm12689	CD_M1
Dbh	CD_M1
Tmem25	CD_M1
Zfp473	CD_M1
Col8a2	CD_M1
Gm5544	CD_M1
Olfr1413	CD_M1
Prrxl1	CD_M1
Olfr594	CD_M1
Rab11fip3	CD_M1
Cpz	CD_M1
Grik5	CD_M1
Hand2	CD_M1
Mphosph9	CD_M1
Gm7247	CD_M1
Upk3bl	CD_M1
Sh3tc1	CD_M1
Stk11ip	CD_M1
Proz	CD_M1
Neurod2	CD_M1
2610028H24Rik	CD_M1
Sspo	CD_M1
Cpne3	CD_M1
Klf16	CD_M1
Olfr417	CD_M1
Zfp775	CD_M1
Bpifb3	CD_M1
4931406H21Rik	CD_M1
Slc22a29	CD_M1
G6pc	CD_M1
Fcmr	CD_M1
Slc4a1	CD_M1
Ifng	CD_M1
Ucn3	CD_M1
Myct1	CD_M1
Hrc	CD_M1
AU016765	CD_M1
Fam19a5	CD_M1
4921509C19Rik	CD_M1
Cldn34b2	CD_M1
H1fnt	CD_M1
Fam228a	CD_M1
Chrd	CD_M1
Ccdc67	CD_M1
Gnat1	CD_M1
Evc2	CD_M1
Cdh3	CD_M1
Adgrd1	CD_M1
1700093K21Rik	CD_M1
Actl11	CD_M1
Tkfc	CD_M1
Myh8	CD_M1
Asprv1	CD_M1
Extl1	CD_M1
Foxb2	CD_M1
Nup214	CD_M1
Hspbp1	CD_M1
C1qtnf5	CD_M1
Calr3	CD_M1
Gypc	CD_M1
Ung	CD_M1
Necab1	CD_M1
Prss39	CD_M1
Dmrtc1a	CD_M1
Olfr1226	CD_M1
Rab36	CD_M1
Vars2	CD_M1
Cdt1	CD_M1
Olfr872	CD_M1
Fam43b	CD_M1
Lin37	CD_M1
Sync	CD_M1
Inpp5e	CD_M1
Tmem198b	CD_M1
Panx3	CD_M1
Gabrb2	CD_M1
E130112N10Rik	CD_M1
Drd5	CD_M1
G430095P16Rik	CD_M1
Gm19475	CD_M1
Iqce	CD_M1
Gpatch2l	CD_M1
Ccr7	CD_M1
Bhlha9	CD_M1
1700010I14Rik	CD_M1
Zfhx4	CD_M1
Traf3ip3	CD_M1
Wfdc6a	CD_M1
Ncmap	CD_M1
Me3	CD_M1
Scel	CD_M1
Trio	CD_M1
Skida1	CD_M1
Gm14920	CD_M1
4933428G20Rik	CD_M1
Accs	CD_M1
3110035E14Rik	CD_M1
Scube3	CD_M1
Tspo2	CD_M1
Nnat	CD_M1
Asphd1	CD_M1
Prox2	CD_M1
Rhox6	CD_M1
Ttc29	CD_M1
A530084C06Rik	CD_M1
Gm13199	CD_M1
Mgat4d	CD_M1
Ptch2	CD_M1
F2rl2	CD_M1
Tas2r105	CD_M1
E2f7	CD_M1
Foxp4	CD_M1
Mpnd	CD_M1
Crhr2	CD_M1
Sema3f	CD_M1
Bahd1	CD_M1
Olfr1454	CD_M1
Slc6a17	CD_M1
Fgf21	CD_M1
Ddx28	CD_M1
Aars2	CD_M1
Tex19.2	CD_M1
4930433N12Rik	CD_M1
Tusc1	CD_M1
Cd300lb	CD_M1
Lrrtm3	CD_M1
Ccdc92	CD_M1
Gga2	CD_M1
Fcgr1	CD_M1
1700001J03Rik	CD_M1
Dhodh	CD_M1
Opalin	CD_M1
Olfr464	CD_M1
Sp110	CD_M1
Cd40	CD_M1
Ptprn	CD_M1
Il18bp	CD_M1
Olfr462	CD_M1
Kif18b	CD_M1
2300003K06Rik	CD_M1
Lgr6	CD_M1
4930556J24Rik	CD_M1
Ptger1	CD_M1
Rhox9	CD_M1
Rptn	CD_M1
Syce2	CD_M1
Neu4	CD_M1
Cbln1	CD_M1
Ppp2r2c	CD_M1
Gipr	CD_M1
5430401F13Rik	CD_M1
Lmntd2	CD_M1
Igf2	CD_M1
Adora1	CD_M1
2300005B03Rik	CD_M1
Faap100	CD_M1
Crh	CD_M1
Map6d1	CD_M1
Tnks1bp1	CD_M1
Stxbp5l	CD_M1
Egr2	CD_M1
Map1a	CD_M1
Spag6l	CD_M1
Npy	CD_M1
Treh	CD_M1
Vgll3	CD_M1
Wnt4	CD_M1
Iqcj	CD_M1
BC100530	CD_M1
Art4	CD_M1
Ppm1m	CD_M1
Gm15292	CD_M1
Icam2	CD_M1
Olfr1241	CD_M1
Eva1a	CD_M1
Ceacam16	CD_M1
Defb15	CD_M1
Olfr311	CD_M1
1700123I01Rik	CD_M1
Krtap26-1	CD_M1
Serpinf2	CD_M1
Adcy9	CD_M1
Timeless	CD_M1
Vsig8	CD_M1
Drd3	CD_M1
Ldb3	CD_M1
Krtdap	CD_M1
BC025920	CD_M1
Galr2	CD_M1
AI467606	CD_M1
Cdk5r1	CD_M1
Trp53i13	CD_M1
B430306N03Rik	CD_M1
Ptgdr2	CD_M1
Six3	CD_M1
Rdh12	CD_M1
Zfp850	CD_M1
Hsd17b1	CD_M1
Spns2	CD_M1
Th	CD_M1
Olfr971	CD_M1
Lzts1	CD_M1
Aim1l	CD_M1
Zfp385c	CD_M1
Olfr566	CD_M1
Gm5591	CD_M1
A430035B10Rik	CD_M1
Myl7	CD_M1
Nxf7	CD_M1
Asgr2	CD_M1
Gpr161	CD_M1
Adrb2	CD_M1
Gm14322	CD_M1
Kcnj10	CD_M1
Crtc3	CD_M1
Pdgfb	CD_M1
Srl	CD_M1
Ulk3	CD_M1
Vwa5b1	CD_M1
Galnt16	CD_M1
Tnni3	CD_M1
Tle2	CD_M1
Svs3a	CD_M1
S1pr4	CD_M1
4921507P07Rik	CD_M1
Spink12	CD_M1
Soga1	CD_M1
Atp13a3	CD_M1
4930591A17Rik	CD_M1
Fam132b	CD_M1
Vmn2r89	CD_M1
6330409D20Rik	CD_M1
I0C0044D17Rik	CD_M1
Gfra4	CD_M1
Pdcd1	CD_M1
Gm13051	CD_M1
Gpr132	CD_M1
D630023F18Rik	CD_M1
Tmem158	CD_M1
Dusp7	CD_M1
Wdr86	CD_M1
Plekhg5	CD_M1
Lsamp	CD_M1
Epor	CD_M1
Smtnl1	CD_M1
Neurl2	CD_M1
Lrrc61	CD_M1
Gxylt2	CD_M1
Olfr740	CD_M1
E130310I04Rik	CD_M1
Cntrob	CD_M1
Rgs8	CD_M1
Cybrd1	CD_M1
Cc2d1b	CD_M1
Adig	CD_M1
Lcat	CD_M1
Ighmbp2	CD_M1
Gli1	CD_M1
Cct8l1	CD_M1
Lmx1b	CD_M1
Gm19902	CD_M1
Gfy	CD_M1
Adm2	CD_M1
Nr2e3	CD_M1
Pdcd2l	CD_M1
Lrrc55	CD_M1
Eva1b	CD_M1
Fam212a	CD_M1
Gjd3	CD_M1
Atp7b	CD_M1
Cx3cr1	CD_M1
Actn3	CD_M1
Chst14	CD_M1
Ptchd4	CD_M1
Grin1	CD_M1
Lrrc7	CD_M1
Rora	CD_M1
Gimd1	CD_M1
Cd209f	CD_M1
Gm6232	CD_M1
Fads6	CD_M1
Ch25h	CD_M1
Arhgap40	CD_M1
Lrg1	CD_M1
Aqp3	CD_M1
Trpm3	CD_M1
Il1rl1	CD_M1
Lgi2	CD_M1
Iqcf3	CD_M1
Fcrlb	CD_M1
Slc27a3	CD_M1
Apobr	CD_M1
Clec2i	CD_M1
Zscan5b	CD_M1
Lgals2	CD_M1
Dnah5	CD_M1
Kcnk15	CD_M1
Zdhhc20	CD_M1
Taar8c	CD_M1
LOC100862066	CD_M1
Cbx8	CD_M1
Vps37d	CD_M1
Ncor2	CD_M1
Gm6588	CD_M1
Aloxe3	CD_M1
Adamts19	CD_M1
Zfp385a	CD_M1
Defb25	CD_M1
Cep164	CD_M1
Lrrc75b	CD_M1
Ffar3	CD_M1
Tbxa2r	CD_M1
Zic4	CD_M1
Prdm11	CD_M1
Clcn6	CD_M1
Srebf1	CD_M1
Vmn1r199	CD_M1
Kncn	CD_M1
Gm17364	CD_M1
Pcsk2	CD_M1
Sytl3	CD_M1
Ccdc28b	CD_M1
Gjb4	CD_M1
Plxna4	CD_M1
Cyp3a16	CD_M1
Egfbp2	CD_M1
Nkx6-1	CD_M1
Lpcat1	CD_M1
Arap3	CD_M1
E330013P04Rik	CD_M1
Fam107a	CD_M1
2610021A01Rik	CD_M1
LOC102634429	CD_M1
3110082J24Rik	CD_M1
Npepl1	CD_M1
Olfr1134	CD_M1
Gng8	CD_M1
Flt4	CD_M1
4930549C01Rik	CD_M1
Frmd5	CD_M1
Kcng1	CD_M1
4930579G24Rik	CD_M1
Ngb	CD_M1
Dsg2	CD_M1
Mybpc1	CD_M1
Ctsj	CD_M1
Nanos1	CD_M1
Elk1	CD_M1
Sfrp2	CD_M1
Tagap	CD_M1
Dll1	CD_M1
Abtb2	CD_M1
Gm15455	CD_M1
Gabrr1	CD_M1
Tbc1d10c	CD_M1
Ankrd13b	CD_M1
Angptl6	CD_M1
Lat	CD_M1
Gm7854	CD_M1
Amtn	CD_M1
AI427809	CD_M1
Abcd3	CD_M1
Elavl3	CD_M1
Gzmm	CD_M1
Crct1	CD_M1
Fancf	CD_M1
Serpina1e	CD_M1
Zkscan17	CD_M1
Gnb2	CD_M1
Relt	CD_M1
Dmwd	CD_M1
Tmem200c	CD_M1
4930404N11Rik	CD_M1
Daam1	CD_M1
Gm9970	CD_M1
Cntfr	CD_M1
Slc23a1	CD_M1
G630025P09Rik	CD_M1
Plin1	CD_M1
Fkrp	CD_M1
Lcn11	CD_M1
Tgm3	CD_M1
Rab44	CD_M1
Tenm2	CD_M1
Dennd1c	CD_M1
Vmn1r87	CD_M1
Sgca	CD_M1
Slc25a47	CD_M1
Rab11fip5	CD_M1
Psg22	CD_M1
Car15	CD_M1
Gm10104	CD_M1
Gm525	CD_M1
Neurog2	CD_M1
Nacad	CD_M1
Zfp346	CD_M1
2610203C22Rik	CD_M1
Slco1a1	CD_M1
Sema4c	CD_M1
Cacng4	CD_M1
Camk1g	CD_M1
Slc38a5	CD_M1
Jsrp1	CD_M1
Etv1	CD_M1
Ovol3	CD_M1
Pofut1	CD_M1
Cabp1	CD_M1
Prrt4	CD_M1
Amt	CD_M1
4930451I11Rik	CD_M1
Smpd5	CD_M1
Grm4	CD_M1
Olfr46	CD_M1
Ulk4	CD_M1
E130116L18Rik	CD_M1
Haao	CD_M1
Nfatc4	CD_M1
Cilp2	CD_M1
Gm5294	CD_M1
Rufy4	CD_M1
Csrnp2	CD_M1
Me2	CD_M1
Pld6	CD_M1
Ankdd1a	CD_M1
Lrrc46	CD_M1
Wdfy2	CD_M1
Rhebl1	CD_M1
Mum1	CD_M1
Zfp516	CD_M1
Rad54l	CD_M1
Stab1	CD_M1
Vwa5b2	CD_M1
Fanca	CD_M1
Gm2023	CD_M1
Ell3	CD_M1
Slurp1	CD_M1
Gm10277	CD_M1
Plcg1	CD_M1
Alkbh2	CD_M1
Cacna1g	CD_M1
Olfr829	CD_M1
Podxl	CD_M1
Pgf	CD_M1
Klhl29	CD_M1
Gm773	CD_M1
Iffo1	CD_M1
Myt1	CD_M1
Pax9	CD_M1
Cyp4f17	CD_M1
Otud7a	CD_M1
Tom1	CD_M1
Klhl10	CD_M1
Gm3285	CD_M1
Ggt7	CD_M1
Faap24	CD_M1
Cyp2b13	CD_M1
Myrf	CD_M1
Tbx4	CD_M1
Fam162b	CD_M1
Adra1a	CD_M1
Olfr71	CD_M1
Phkg1	CD_M1
Cd33	CD_M1
Prr7	CD_M1
Vtn	CD_M1
Camk2a	CD_M1
Lce3d	CD_M1
Kif24	CD_M1
Zdhhc19	CD_M1
Fgd1	CD_M1
Col6a3	CD_M1
Sergef	CD_M1
Nhlrc1	CD_M1
Psmc3ip	CD_M1
Zfp526	CD_M1
Elac1	CD_M1
AY761185	CD_M1
Tmem108	CD_M1
Vill	CD_M1
Otop2	CD_M1
A530016L24Rik	CD_M1
Bard1	CD_M1
Trp53bp1	CD_M1
Brd2	CD_M1
Arf4os	CD_M1
Efemp2	CD_M1
Zc3h3	CD_M1
Ackr4	CD_M1
Inhbb	CD_M1
Odf3l2	CD_M1
Zfp560	CD_M1
Gm15821	CD_M1
Mob3c	CD_M1
Edar	CD_M1
L3mbtl2	CD_M1
Csf3	CD_M1
Igll1	CD_M1
Nsl1	CD_M1
Ism2	CD_M1
Lingo3	CD_M1
Fxyd4	CD_M1
Msln	CD_M1
Ush1g	CD_M1
Klrk1	CD_M1
Slc41a3	CD_M1
E030018B13Rik	CD_M1
1700056E22Rik	CD_M1
Samd14	CD_M1
Svop	CD_M1
Ssbp3	CD_M1
Pmel	CD_M1
Rpia	CD_M1
Chst12	CD_M1
Col9a2	CD_M1
Zfp629	CD_M1
Fam167b	CD_M1
Gm16486	CD_M1
Crocc	CD_M1
Tnfrsf13b	CD_M1
Tnfsf15	CD_M1
Gm13306	CD_M1
Apcdd1	CD_M1
Defa25	CD_M1
Snph	CD_M1
Mcmdc2	CD_M1
Rax	CD_M1
Prtn3	CD_M1
Olfr392	CD_M1
Defb40	CD_M1
Syt15	CD_M1
Shc4	CD_M1
Pitpnm1	CD_M1
Odf3	CD_M1
Olfr906	CD_M1
Hdac6	CD_M1
Bhlhb9	CD_M1
Vegfc	CD_M1
Acsm1	CD_M1
Ddx11	CD_M1
Lrrc4b	CD_M1
Col6a4	CD_M1
Zdhhc8	CD_M1
Traf1	CD_M1
Irs3	CD_M1
Vsig10l	CD_M1
Lect1	CD_M1
Gatsl2	CD_M1
Gm19549	CD_M1
Dlg4	CD_M1
Hes2	CD_M1
Gpr146	CD_M1
Gper1	CD_M1
Dlgap2	CD_M1
1600002H07Rik	CD_M1
Hfe	CD_M1
Aqp7	CD_M1
Tssc4	CD_M1
Kcnk10	CD_M1
Plekhf1	CD_M1
Chst2	CD_M1
Slc35d3	CD_M1
Scn2b	CD_M1
Klhl18	CD_M1
Hrct1	CD_M1
Slc29a4	CD_M1
Defa23	CD_M1
Isoc2b	CD_M1
Padi2	CD_M1
Ybx2	CD_M1
Cecr5	CD_M1
Ccl24	CD_M1
C1qtnf9	CD_M1
Gm436	CD_M1
Actrt2	CD_M1
Stk19	CD_M1
Necab3	CD_M1
Kazn	CD_M1
Shank2	CD_M1
Gbx2	CD_M1
Dnm3	CD_M1
Prr22	CD_M1
Gm15056	CD_M1
Pgbd5	CD_M1
Nmnat2	CD_M1
Mtnr1b	CD_M1
Tub	CD_M1
St3gal2	CD_M1
Zfp668	CD_M1
Cep128	CD_M1
Tspyl5	CD_M1
Crhbp	CD_M1
Xylt1	CD_M1
Kcnq5	CD_M1
Galp	CD_M1
Rhbdf2	CD_M1
Megf8	CD_M1
Foxi2	CD_M1
D630003M21Rik	CD_M1
Mst1	CD_M1
Ipo13	CD_M1
Prp2	CD_M1
Krba1	CD_M1
Vstm2b	CD_M1
1810011H11Rik	CD_M1
Gm38425	CD_M1
Car7	CD_M1
Slc2a7	CD_M1
Rnf223	CD_M1
Il1b	CD_M1
Rarg	CD_M1
Osbpl5	CD_M1
Kcp	CD_M1
Krt79	CD_M1
Reg3a	CD_M1
Tmem180	CD_M1
Nlgn3	CD_M1
Ttc34	CD_M1
Trp53rkb	CD_M1
Dnajb8	CD_M1
Pdlim2	CD_M1
Erp27	CD_M1
Borcs5	CD_M1
C030048H21Rik	CD_M1
Galnt9	CD_M1
Inhbe	CD_M1
Eme2	CD_M1
Pla1a	CD_M1
Trmt61a	CD_M1
Dppa5a	CD_M1
Cldn34c2	CD_M1
Ttc28	CD_M1
Enpp7	CD_M1
Mapk11	CD_M1
Gm15284	CD_M1
4922502D21Rik	CD_M1
Dtwd2	CD_M1
Snhg11	CD_M1
Slc26a6	CD_M1
Fcamr	CD_M1
Doc2b	CD_M1
Defb1	CD_M1
Gm7849	CD_M1
Gm7861	CD_M1
Olfr286	CD_M1
Rgma	CD_M1
Dok3	CD_M1
Pla2g2c	CD_M1
Zbtb17	CD_M1
Sec14l2	CD_M1
Cntnap3	CD_M1
Pnma1	CD_M1
Trim80	CD_M1
Gm17334	CD_M1
Nav3	CD_M1
Izumo2	CD_M1
Zp2	CD_M1
Cml5	CD_M1
Tacr1	CD_M1
Tert	CD_M1
Vmn2r79	CD_M1
Ubxn10	CD_M1
Taf1c	CD_M1
Susd4	CD_M1
Rxfp2	CD_M1
Cts3	CD_M1
Khdc3	CD_M1
AU019823	CD_M1
Ckm	CD_M1
Wnt9b	CD_M1
Lcmt2	CD_M1
Muc5b	CD_M1
Ercc1	CD_M1
7530416G11Rik	CD_M1
Paqr7	CD_M1
Fam124a	CD_M1
Ntng2	CD_M1
Sncaip	CD_M1
Tekt4	CD_M1
Tonsl	CD_M1
Nudt17	CD_M1
1700012B09Rik	CD_M1
Pidd1	CD_M1
4930538K18Rik	CD_M1
Prpf31	CD_M1
Ssc4d	CD_M1
Abca4	CD_M1
Zfp275	CD_M1
AY761184	CD_M1
Syde1	CD_M1
Shpk	CD_M1
Pea15b	CD_M1
Csf2rb	CD_M1
Plcb2	CD_M1
Gja6	CD_M1
AI606181	CD_M1
Gm2506	CD_M1
Gm9821	CD_M1
Il17c	CD_M1
Sik3	CD_M1
Pcdhb12	CD_M1
Fam187a	CD_M1
Zbtb49	CD_M1
Cerkl	CD_M1
Wdr4	CD_M1
Fam171a2	CD_M1
D830013O20Rik	CD_M1
Zfp334	CD_M1
Eml6	CD_M1
Thoc6	CD_M1
4930544D05Rik	CD_M1
Klhl33	CD_M1
Vmn2r61	CD_M1
Svip	CD_M1
Rhbdd3	CD_M1
Nxph3	CD_M1
Siglec1	CD_M1
Emx1	CD_M1
Slc13a5	CD_M1
Olfr224	CD_M1
Vmn1r90	CD_M1
Olfr455	CD_M1
Vmn2r114	CD_M1
C130032M10Rik	CD_M1
Ngfr	CD_M1
Dennd6b	CD_M1
Pax3	CD_M1
Snn	CD_M1
Cul7	CD_M1
Dab2ip	CD_M1
Rxfp4	CD_M1
N4bp3	CD_M1
Lif	CD_M1
Wfikkn1	CD_M1
Abca17	CD_M1
Urad	CD_M1
Atoh8	CD_M1
Cplx1	CD_M1
Samd3	CD_M1
Dcdc2c	CD_M1
Fstl5	CD_M1
Pinlyp	CD_M1
BC024978	CD_M1
Sox8	CD_M1
Dnah1	CD_M1
Zfp524	CD_M1
B3gnt8	CD_M1
Hs6st3	CD_M1
Npc1l1	CD_M1
Sox7	CD_M1
Thsd7a	CD_M1
Zar1l	CD_M1
Prob1	CD_M1
Gchfr	CD_M1
Gm14403	CD_M1
Mcat	CD_M1
Proc	CD_M1
Tnni2	CD_M1
Mrc2	CD_M1
Rbfox1	CD_M1
Sh2d2a	CD_M1
Hspb2	CD_M1
Spert	CD_M1
Aunip	CD_M1
Gabbr1	CD_M1
Gm7972	CD_M1
Fat2	CD_M1
Pirb	CD_M1
Cpa1	CD_M1
Gm11146	CD_M1
Pla2g2e	CD_M1
Rltpr	CD_M1
Plin4	CD_M1
Gm826	CD_M1
Gm10465	CD_M1
Ccl27b	CD_M1
Celf3	CD_M1
Prr29	CD_M1
Setdb2	CD_M1
Adamts2	CD_M1
2010300C02Rik	CD_M1
Lrrd1	CD_M1
Ccdc13	CD_M1
Foxq1	CD_M1
Ccl19	CD_M1
Mmp17	CD_M1
Nudt18	CD_M1
Oscp1	CD_M1
Oxct2b	CD_M1
Cyp2ab1	CD_M1
Prss47	CD_M1
Traf4	CD_M1
Ttc22	CD_M1
Wdr81	CD_M1
Paqr6	CD_M1
Cog1	CD_M1
Sec1	CD_M1
Fbp1	CD_M1
Taf3	CD_M1
Gdf7	CD_M1
Slc28a2	CD_M1
Gm5858	CD_M1
Myh13	CD_M1
Atxn2	CD_M1
Ebf3	CD_M1
Col15a1	CD_M1
Zfp429	CD_M1
Pi4k2a	CD_M1
Ptchd3	CD_M1
Rfc5	CD_M1
Adamts12	CD_M1
Olfr599	CD_M1
Dmtn	CD_M1
Hap1	CD_M1
1700001O22Rik	CD_M1
Kif21b	CD_M1
Klhl21	CD_M1
Olfr516	CD_M1
Fam183b	CD_M1
Amigo3	CD_M1
Cep131	CD_M1
Gm10803	CD_M1
Slc5a12	CD_M1
Cdk5r2	CD_M1
Ctrl	CD_M1
Rp1l1	CD_M1
Prss2	CD_M1
Tcl1b2	CD_M1
Lman2l	CD_M1
Adgrg5	CD_M1
Nhs	CD_M1
Tmem88	CD_M1
Otp	CD_M1
Phxr4	CD_M1
Tll1	CD_M1
Lst1	CD_M1
Gm13308	CD_M1
Nat8	CD_M1
Aqp5	CD_M1
Smad6	CD_M1
2900011O08Rik	CD_M1
Tgfbr3l	CD_M1
Gata5	CD_M1
Fgf22	CD_M1
Gm10663	CD_M1
Figf	CD_M1
Arrdc5	CD_M1
Abcg4	CD_M1
Ntn5	CD_M1
Vmn2r122	CD_M1
Milr1	CD_M1
Epha1	CD_M1
Snx11	CD_M1
Sh2d1a	CD_M1
Gjc3	CD_M1
Klc3	CD_M1
LOC100861647	CD_M1
Lpin3	CD_M1
Acot12	CD_M1
Olfr584	CD_M1
Olfr1532-ps1	CD_M2
Olfr633	CD_M2
Vmn1r193	CD_M2
Gm5797	CD_M2
Gm21866	CD_M2
Gm21783	CD_M2
Gm21725	CD_M2
Gm21764	CD_M2
Gm21828	CD_M2
Gm21852	CD_M2
Gm21891	CD_M2
Gm21904	CD_M2
Olfr632	CD_M2
Acp1	CD_M2
LOC100041897	CD_M2
Gm7735	CD_M2
Gm21763	CD_M2
Tax1bp1	CD_M2
Gm4884	CD_M2
Gm21732	CD_M2
LOC100039905	CD_M2
LOC100862113	CD_M2
Gm21698	CD_M2
Gm2030	CD_M2
Gm10354	CD_M2
Gm6676	CD_M2
Gm21773	CD_M2
Pramel4	CD_M2
LOC100042012	CD_M2
Krtap6-5	CD_M2
Rhox4e	CD_M2
Cyp2d10	CD_M2
Gm21788	CD_M2
LOC100042357	CD_M2
LOC100862025	CD_M2
Gm10576	CD_M2
Mtnr1a	CD_M2
Gm21921	CD_M2
Krtap6-3	CD_M2
Gm3317	CD_M2
Gm3488	CD_M2
Gm10999	CD_M2
9030624G23Rik	CD_M2
Sly	CD_M2
1700040F15Rik	CD_M2
LOC100861615	CD_M2
Gm10339	CD_M2
Gm29073	CD_M2
Gm20852	CD_M2
LOC100040786	CD_M2
LOC100042279	CD_M2
LOC100042443	CD_M2
Gm2799	CD_M2
LOC100862125	CD_M2
Gm20736	CD_M2
Gm14345	CD_M2
Gm5796	CD_M2
Gm21739	CD_M2
Gm21671	CD_M2
Olfr549	CD_M2
Gm10985	CD_M2
Gm21095	CD_M2
2610042L04Rik	CD_M2
Gm3629	CD_M2
Gm3739	CD_M2
LOC105242449	CD_M2
Gm5114	CD_M2
LOC380994	CD_M2
Gm20823	CD_M2
Gm3252	CD_M2
Gm20914	CD_M2
Gm21560	CD_M2
4930467E23Rik	CD_M2
Gm2964	CD_M2
Gm21117	CD_M2
Vmn1r197	CD_M2
Gm21258	CD_M2
Gm3667	CD_M2
Gm21119	CD_M2
Gm3298	CD_M2
Gm20896	CD_M2
4930555F03Rik	CD_M2
Gm20854	CD_M2
Gm21767	CD_M2
Gm21822	CD_M2
Cd72	CD_M2
Gm20831	CD_M2
Gm16434	CD_M2
Gm20946	CD_M2
Gm21333	CD_M2
Gm15319	CD_M2
Olfr517	CD_M2
Gm20809	CD_M2
Gm3752	CD_M2
Gm38423	CD_M2
Gm20925	CD_M2
Gm21661	CD_M2
Gm20917	CD_M2
Gm20840	CD_M2
Olfr559	CD_M2
Gm21209	CD_M2
Ssty2	CD_M2
Gm20738	CD_M2
C87499	CD_M2
Gm13178	CD_M2
Zscan4c	CD_M2
Gm20834	CD_M2
Olfr670	CD_M2
Olfr323	CD_M2
Gm21800	CD_M2
Gm21760	CD_M2
Gm21746	CD_M2
Gm21882	CD_M2
Gm20747	CD_M2
Gm21350	CD_M2
Gm21791	CD_M2
Gm21845	CD_M2
Gm21890	CD_M2
Gm21650	CD_M2
Gm14374	CD_M2
Gm3264	CD_M2
Vmn2r48	CD_M2
Taar7d	CD_M2
Ifna2	CD_M2
Gm17404	CD_M2
4930555G01Rik	CD_M2
Gm21118	CD_M2
Gm10251	CD_M2
Gm2046	CD_M2
Gm10340	CD_M2
Gm2956	CD_M2
LOC102641780	CD_M2
Plekhg4	CD_M2
Olfr1359	CD_M2
Gm21775	CD_M2
Gm8297	CD_M2
Olfr770	CD_M2
Gm21776	CD_M2
Gm21913	CD_M2
Gm21951	CD_M2
Vmn2r41	CD_M2
Gm14190	CD_M2
Gm2825	CD_M2
LOC100504725	CD_M2
4933402N22Rik	CD_M2
Vmn1r238	CD_M2
Rab37	CD_M2
Gm11239	CD_M2
4930572O03Rik	CD_M2
Gm3149	CD_M2
Olfr538	CD_M2
Speer4b	CD_M2
Gm8362	CD_M2
Rhox4a	CD_M2
Tcl1b5	CD_M2
Iltifb	CD_M2
Fcna	CD_M2
Gm17019	CD_M2
Gm20888	CD_M2
Gm5862	CD_M2
LOC100040054	CD_M2
2010-03-01	CD_M2
Gm20937	CD_M2
Gm3383	CD_M2
Gm21699	CD_M2
Olfr1371	CD_M2
Olfr1184	CD_M2
4930431F12Rik	CD_M2
Gm3460	CD_M2
Olfr212	CD_M2
Vmn2r98	CD_M2
LOC100504702	CD_M2
Gm17365	CD_M2
Olfr76	CD_M2
Gm14346	CD_M2
A930009A15Rik	CD_M2
Olfr1347	CD_M2
Rhox2c	CD_M2
Gm20830	CD_M2
Vmn2r105	CD_M2
Olfr1381	CD_M2
Popdc3	CD_M2
Gm2888	CD_M2
Pramel5	CD_M2
Gm8159	CD_M2
Gm3558	CD_M2
Gm2777	CD_M2
Gm20843	CD_M2
Gm2863	CD_M2
Olfr1252	CD_M2
[truncated: 13,080 more rows]

## Sheet: Module Eigengenes (CD)
Strain	Diet	CD_M1	CD_M2	CD_M3	CD_M4	CD_M5	CD_M6	CD_M7	CD_M8	CD_M9	CD_M10	CD_M11	CD_M12	CD_M13	CD_M14	CD_M15	CD_M16	CD_M17	CD_M18	CD_M19	CD_M20	CD_M21	CD_M22	CD_M23	CD_M24	CD_M25	CD_M26	CD_M27	CD_M28	CD_M29	CD_M30	CD_M31	CD_M32	CD_M33	CD_M34	CD_M35	CD_M36	CD_M37	CD_M38	CD_M39	CD_M40	CD_M41	CD_M42	CD_M43	CD_M44	CD_M45
BXD1	CD	0.141288	0.116033	-0.219739	-0.262139	-0.0324131	0.178363	0.0855347	-0.0918554	-0.0597417	0.0519575	-0.183555	-0.203872	-0.222127	0.028668	-0.298069	-0.174831	0.170652	-0.0278382	-0.168808	0.053769	-0.0330072	0.0529684	0.157522	0.164106	-0.129122	-0.241991	0.210373	0.210621	0.259265	-0.170595	0.010453	-0.029511	-0.0934573	0.118923	-0.0681757	0.140497	0.303903	0.0923547	-0.188283	-0.00611074	-0.0050172	0.157705	0.150994	-0.10237	0.122178
BXD101	CD	-0.0724188	-0.0883387	0.12827	0.271996	-0.0166157	-0.026823	-0.0544135	-0.053627	-0.0700737	0.0663599	0.275726	0.18291	0.194559	-0.0347738	0.341448	0.276991	-0.308094	-0.109791	0.207157	-0.115391	0.13381	-0.047053	-0.218924	-0.305618	0.160672	0.365118	-0.18475	0.0524621	0.0879699	0.298297	-0.183788	-0.128783	-0.0669226	-0.0217556	0.105159	-0.1503	-0.261123	-0.121321	0.175529	-0.155235	-0.126766	-0.19427	-0.199703	0.112401	-0.137182
BXD11	CD	-0.0557145	-0.0573938	-0.145138	-0.105109	0.000153522	0.276121	0.223489	-0.0239255	0.0139075	-0.00647514	0.112797	0.150256	-0.0469885	-0.0248122	-0.112031	-0.00977895	0.15953	-0.10589	-0.0506532	-0.0488064	0.120106	-0.0441545	0.0614195	0.0891409	0.187817	-0.207449	0.15832	0.138535	-0.09809	-0.136675	0.123198	-0.0420362	0.0896823	-0.0290165	-0.0948141	0.186605	0.129468	0.158237	-0.190982	-0.0319706	0.131594	-0.1703	0.261581	-0.0173302	0.163377
BXD12	CD	0.278159	0.0288955	-0.253045	-0.115545	-0.133365	0.0244083	-0.0776313	-0.210515	-0.00231495	0.0716459	0.135724	-0.0877406	-0.11478	-0.0954262	0.0314999	0.0974698	-0.106417	-0.252322	-0.0812177	-0.206121	0.103579	-0.1477	0.106272	-0.214754	0.0573433	0.0582757	-0.0573026	0.063422	0.235913	-0.00294954	-0.174499	0.0367386	-0.124316	-0.0444134	-0.077099	-0.16365	-0.123825	-0.133826	-0.20235	-0.115611	-0.0152425	0.30324	0.126254	-0.0194352	-0.0557722
BXD16	CD	0.0256987	-0.0700441	-0.133631	0.0343612	0.0774294	0.0289919	0.0410874	-0.107425	-0.0141874	-0.0315133	0.0958307	0.0394795	-0.059382	0.0342987	0.185734	0.15532	-0.144035	-0.204945	-0.119253	-0.0209103	0.158504	-0.0651406	0.0176026	-0.13802	0.00434015	0.121721	-0.0134504	0.155028	-0.0375975	0.105162	-0.0767316	-0.0747698	0.0187493	0.0647142	-0.141593	-0.203262	-0.162323	0.0535221	-0.0632782	-0.0215765	-0.115274	-0.15087	-0.0951127	0.0303511	0.00390047
BXD2	CD	0.000544214	-0.0455226	-0.172953	-0.0961074	-0.180284	0.242317	0.139131	-0.117795	-0.0740768	0.25665	0.0643898	0.0777433	-0.0974215	-0.19911	-0.0214024	-0.00509733	0.130781	-0.141236	0.190284	-0.0871132	0.0262837	0.0588578	-0.114906	-0.0570551	0.185552	-0.166962	-0.0822164	-0.0110468	-0.110153	-0.0543514	0.166584	-0.100918	-0.163415	0.125725	0.213027	0.155393	0.100642	0.00284035	-0.137147	0.0335059	-0.236054	-0.286706	0.142864	-0.185474	-0.134737
BXD27	CD	0.0384185	-0.0443242	-0.0797852	-0.141164	0.123121	0.135277	0.115837	-0.0399492	-0.115327	-0.0971877	-0.189524	-0.0806563	-0.165576	0.235021	-0.156512	-0.00384894	0.0459073	-0.0502592	-0.246675	0.104009	0.166127	0.0350355	0.10446	0.143818	-0.133316	0.0853723	0.26625	-0.0684096	0.24316	-0.00339878	-0.136914	-0.100621	-0.0101999	0.116982	-0.114829	-0.00443032	0.225945	0.214406	-0.13625	0.0954038	0.253727	0.0278427	0.0102327	0.212006	0.20367
BXD32	CD	0.140986	0.034127	-0.158749	-0.0471196	-0.0703349	0.0142194	-0.0104766	-0.124175	0.0400508	0.219162	-0.00860454	-0.146966	-0.075365	-0.145069	0.123775	0.170571	-0.18866	-0.139269	0.110008	-0.0836626	-0.0737878	-0.0069011	-0.162124	-0.183481	0.0310496	-0.071953	-0.20434	-0.159748	-0.0483398	0.194861	-0.0740852	-0.00303799	-0.125705	0.103963	0.163479	-0.0839904	-0.0688257	-0.238137	-0.124522	0.170459	-0.138663	-0.0669074	-0.0901011	-0.316696	-0.119423
BXD34	CD	0.0940053	0.113772	-0.0911061	-0.0846867	-0.202949	0.0452068	-0.0469655	-0.104514	-0.00219715	0.281745	-0.0426694	-0.114378	-0.0805249	-0.204563	-0.0381782	-0.00898458	0.00796391	-0.117228	0.129188	-0.129919	-0.0183179	0.0692324	0.153647	-0.138608	0.0653707	-0.0421573	-0.181607	0.000882202	-0.0774436	-0.0270644	0.0939852	-0.096031	-0.18265	0.165057	0.271221	-0.0244208	-0.0637483	0.0304097	-0.0316346	0.18003	0.211792	-0.101886	0.0488373	-0.0414176	-0.190958
BXD40	CD	0.134563	0.189653	-0.149375	-0.268149	-0.145637	0.0711486	-0.0346305	-0.129588	-0.19477	0.131436	-0.23902	-0.148468	-0.223731	-0.0087569	-0.210984	-0.136213	-0.0752051	-0.0784295	-0.123916	0.139728	0.00319483	0.146979	0.191528	-0.0691191	-0.0959053	0.0561587	-0.0167522	-0.0436716	0.0183226	0.131151	-0.177974	-0.127055	-0.158688	0.206065	0.144828	-0.00915025	0.174112	-0.0449137	-0.0406129	0.103638	0.257731	-0.244533	-0.0998881	0.0972644	-0.104957
BXD43	CD	0.300686	0.322311	-0.185602	-0.206234	-0.283465	-0.0538744	-0.248967	-0.262437	-0.183263	0.20291	-0.247672	-0.241285	-0.286604	-0.159093	-0.242717	-0.196276	0.0245217	-0.204709	-0.113447	-0.132231	-0.0837683	0.0635409	0.26189	-0.130794	-0.092794	0.0682805	-0.196279	-0.092674	0.324092	-0.0061879	-0.134886	-0.2083	-0.232152	0.154344	0.16596	-0.127358	0.0373861	-0.058702	0.0494704	0.354381	0.121592	0.0492838	0.18144	0.0853669	-0.193779
BXD44	CD	0.0275162	0.0898078	-0.0193141	-0.0766631	-0.103949	0.0603456	-0.0909464	-0.0997823	-0.110603	0.118045	-0.044964	-0.151017	-0.140246	0.0283335	-0.182888	-0.148847	0.218892	0.0132112	-0.0099987	0.0183874	-0.130217	0.201478	0.107874	0.0462657	-0.0109166	-0.173945	-0.0969757	-0.181517	-0.0137788	-0.120989	0.106072	-0.0494855	-0.149494	0.19032	0.129514	0.0929074	0.129011	-0.150398	0.106622	-0.00863217	-0.0150508	0.0924819	0.234276	-0.107488	0.00757396
BXD45	CD	0.324358	0.348274	-0.12635	-0.0633202	-0.310458	-0.246547	-0.369955	-0.349941	-0.33736	0.261897	0.00640841	-0.21307	-0.264304	-0.116746	-0.0703457	-0.20644	-0.0392133	-0.254941	-0.135305	-0.102497	-0.175782	0.114774	0.069179	-0.248804	-0.167201	-0.0231033	-0.253192	-0.134549	0.115418	-0.109674	-0.207416	-0.127382	-0.340869	0.215404	0.240956	-0.33002	-0.255704	-0.252849	0.0910614	-0.127476	0.104694	-0.00822745	0.110431	-0.152231	-0.278018
BXD49	CD	0.219973	0.403171	-0.101459	-0.0351495	-0.26875	-0.307506	-0.368051	-0.27224	-0.21998	0.157912	0.0344538	-0.27315	-0.204234	-0.112176	-0.012657	-0.115631	-0.135637	-0.186978	-0.139105	-0.0206724	-0.271288	0.153955	0.318115	-0.255305	-0.169279	-0.123736	-0.348986	-0.186702	0.353369	0.021517	-0.142664	-0.0108809	-0.340119	0.131887	0.17445	-0.285341	-0.276738	-0.313827	0.118997	0.161067	0.183924	-0.00964047	-0.0957469	-0.333414	-0.296998
BXD51	CD	-0.0220673	0.175607	0.0829799	0.028013	-0.0939592	-0.0191674	-0.13045	-0.048334	-0.150701	0.10693	0.00866158	-0.109872	-0.124252	0.041019	-0.175798	-0.264785	0.209726	0.0645358	-0.0183245	0.104016	-0.168704	0.26767	0.153281	0.0680524	-0.103202	-0.14693	-0.0335232	-0.166396	0.212206	-0.168267	0.0373437	-0.0914698	-0.15386	0.171741	0.207291	0.00416564	0.103676	0.00396141	0.228331	0.253484	-0.0339737	-0.18233	0.153187	-0.10473	-0.0911253
BXD55	CD	0.200966	0.212334	-0.111043	-0.17922	-0.239435	-0.0292265	-0.118684	-0.149339	-0.105573	0.291967	-0.208626	-0.228879	-0.193465	-0.158898	-0.198573	-0.158182	0.0696192	-0.0601855	0.0247444	0.0233739	-0.0722791	0.15735	-0.122237	0.00406099	-0.0966277	-0.0846477	-0.11566	-0.151887	0.0303809	-0.166354	0.0300986	-0.0103863	-0.19285	0.177637	0.222999	-0.0312871	0.0934726	-0.00896841	-0.0499896	0.191573	0.00833195	0.133369	0.0754327	0.0423622	-0.136993
BXD56	CD	-0.0726779	0.00735072	0.0276261	-0.0115008	-0.0572692	0.0869626	0.0576247	0.00536651	-0.0675587	0.0502916	0.127194	0.0430282	0.00967759	-0.0437486	-0.0310964	-0.0427474	-0.10309	-0.00261478	0.13549	-0.0710056	-0.0420757	0.0256731	-0.164459	-0.117525	0.0835423	-0.096636	-0.0319458	0.186457	0.148882	0.247569	-0.0669718	0.145497	-0.0437411	0.0900291	0.0520602	-0.00866861	0.0547398	-0.125998	0.0566516	-0.198581	-0.12449	-0.223162	0.0877765	-0.137671	-0.0437798
BXD6	CD	0.0986081	-0.117262	-0.222913	-0.189827	0.00535857	0.240192	0.241641	0.0128973	0.179949	-0.0274966	0.0210703	0.112149	-0.0156469	-0.10623	-0.0592528	0.0906669	0.0829523	-0.141753	0.00367795	-0.202284	0.168006	-0.219572	-0.150282	0.0890618	0.185268	0.0230721	0.176064	-0.114841	-0.058641	-0.0666386	0.0916251	-0.112314	0.149651	-0.0388513	-0.178139	0.167229	0.0643855	0.0496115	-0.262601	-0.0762883	0.0586487	-0.127494	0.206111	0.0713484	0.296576
BXD60	CD	-0.0327484	-0.116399	0.0588287	0.0305684	0.0509435	0.0278999	0.0555547	0.140512	0.177916	-0.122663	-0.00490373	0.0440786	0.10665	-0.0173582	-0.0143424	0.0247996	0.154726	0.0790293	0.0803796	-0.0646794	0.0176368	-0.122408	-0.220976	0.132028	0.060808	-0.0267537	0.0899406	0.0324815	-0.0862982	-0.0976081	0.191996	0.00366777	0.124227	-0.16088	-0.172166	0.119183	0.018976	0.129381	0.00885044	-0.0536427	0.030299	0.157621	0.183578	0.110491	0.175993
BXD61	CD	0.173248	0.0265181	-0.0797056	-0.0810119	-0.0353678	0.0142471	-0.0565859	-0.140206	-0.134979	-0.057175	0.221329	0.00501275	-0.113263	0.0985663	-0.0832495	-0.0946695	-0.0585591	-0.111069	-0.218222	-0.0682768	0.0817411	0.0073718	-0.182956	-0.0271716	-0.0681811	0.101679	0.150359	-0.125892	-0.0274654	-0.125045	-0.163898	-0.105503	-0.0536496	0.122909	-0.13559	-0.116798	0.0309674	0.164921	0.0494924	0.00316714	0.140464	0.352115	-0.209366	0.16041	0.0470647
BXD62	CD	0.0155446	-0.0794911	-0.00232602	-0.0379085	0.129325	0.0589482	0.0990574	0.0779116	0.0917372	-0.1099	-0.104786	-0.029325	-0.00356477	0.0326301	0.114697	0.152614	-0.0429705	0.0565651	-0.0203834	0.0635164	0.105306	-0.0946559	0.0559114	0.0636565	0.00526577	0.169622	0.06736	-0.157505	-0.113172	0.0779401	-0.104156	0.212858	0.0845213	-0.30628	-0.178322	0.0442068	0.094981	-0.00177801	-0.0193477	-0.0937563	0.134208	0.212899	-0.0950748	0.0995174	0.115912
BXD63	CD	-0.115444	-0.0284607	0.0310734	0.129287	0.164448	0.0570588	0.0194143	-0.0303541	-0.0878966	-0.250764	0.0923963	0.258465	0.135343	0.158871	0.148314	0.0213616	-0.101026	-0.0459119	-0.175783	-0.0194991	0.28543	-0.0814876	-0.194719	-0.00963117	0.102536	0.247367	0.150568	0.209994	-0.0898187	-0.0567341	-0.146495	-0.126075	0.141789	-0.0789644	-0.252006	-0.0529803	-0.0762244	0.305834	0.0712276	-0.149707	0.178188	-0.000144736	-0.211772	0.357182	0.162033
BXD64	CD	-0.0963703	-0.160488	-0.0105005	0.128029	0.149336	0.0926863	0.176535	0.0918249	0.172168	-0.22503	0.30609	0.267593	0.219405	-0.00709353	0.214348	0.219315	-0.278988	-0.0656983	0.0739229	-0.162777	0.237444	-0.281088	-0.227196	-0.0899429	0.164758	0.2071	0.178612	0.284179	0.129886	0.11249	-0.121398	0.119976	0.247642	-0.265129	-0.258368	0.00749905	-0.149407	0.158742	-0.0933708	-0.183548	0.0632169	0.0784114	-0.328216	0.171068	0.22604
BXD65	CD	0.132477	-0.0390459	-0.0495296	-0.0135947	-0.160204	-0.00988608	-0.038468	-0.00628234	0.12462	0.162169	-0.0321088	-0.00101569	0.0273771	-0.252448	-0.00493732	0.0634049	0.0161163	-0.0339477	0.100701	-0.0949384	0.0385824	-0.0871741	0.0882725	-0.117455	0.0986321	-0.0201116	-0.125158	-0.0910077	-0.117303	-0.0383711	0.11794	-0.0585917	-0.0201523	-0.0984442	0.126856	0.0109987	-0.12484	0.0640838	-0.0183558	0.2039	-0.145179	0.152906	0.00109809	0.0246036	0.0378874
BXD65a	CD	0.0238554	-0.00149062	-0.000927529	-0.147564	-0.0746232	0.131646	0.136042	0.184488	0.134242	-0.0791724	0.00184158	0.0397924	0.0295992	-0.132086	-0.110733	-0.0354659	0.161811	0.125024	0.0376837	-0.112239	0.0108161	-0.172955	0.0833888	0.157115	0.098372	-0.203878	0.137025	-0.0914789	-0.0966135	-0.155575	0.192841	-0.0701213	0.068265	-0.103765	-0.120536	0.277944	0.127148	0.132703	-0.142898	0.00541729	-0.102367	0.140324	0.0387029	-0.0606589	0.136936
BXD65b	CD	-0.168153	-0.204915	0.0277302	0.0216307	0.0609369	0.129706	0.192341	0.156567	0.23615	-0.107569	0.105084	0.227424	0.151994	-0.0387279	0.0118681	0.0934828	0.0477615	0.0467537	0.164016	-0.0617611	0.174316	-0.150539	0.00807668	0.0201059	0.232406	0.123747	0.142455	0.0780716	-0.182622	0.046366	0.149771	-0.0631941	0.218158	-0.110548	-0.107977	0.188566	-0.0162678	0.154311	-0.083252	-0.0416409	-0.188077	0.0365805	0.100486	0.218346	0.246386
BXD66	CD	0.172183	0.126289	-0.0642953	-0.0959679	-0.0225153	-0.0356209	-0.0556527	0.00930376	0.059389	-0.021577	-0.182373	-0.154818	-0.0771122	-0.0529072	-0.103744	-0.0904435	0.0900835	-0.0006064	-0.173543	-0.0356861	-0.0541559	-0.110635	-0.170746	0.0840949	-0.0996946	-0.144506	0.0492028	-0.126041	-0.00490641	-0.212514	0.0792193	0.167891	0.0541962	-0.187182	-0.106023	0.0480147	0.0231961	0.0392829	-0.0469947	0.251636	-0.0412435	0.315934	0.0739798	-0.0735721	0.0921315
BXD67	CD	-0.0451685	-0.1867	0.066673	0.0950306	0.0339825	0.10041	0.11394	0.109027	0.203376	0.04938	-0.123937	0.0885919	0.121876	-0.117757	0.050333	0.092034	0.113333	0.0756897	0.183582	0.000721319	0.0571161	-0.0880757	0.00718147	0.0985889	0.151024	0.0447143	-0.0133933	-0.257847	-0.16705	-0.040161	0.200725	-0.110084	0.116517	-0.158832	-0.0129211	0.157217	-0.0169283	0.0519755	0.0167024	0.0470305	-0.232074	0.0298103	0.079821	-0.00518659	0.136779
BXD68	CD	0.0013714	-0.124151	-0.0616744	0.139941	-0.0997945	0.0308057	0.0765207	-0.0799718	0.0997782	0.0737107	0.232394	0.254382	0.197074	-0.262757	0.246038	0.239814	-0.343247	-0.228176	0.205605	-0.318011	0.116022	-0.23767	0.0467353	-0.282122	0.24374	0.126082	-0.153274	0.235852	0.159086	0.227477	-0.21027	0.414693	-0.0116012	-0.132395	-0.0381613	-0.121299	-0.333811	-0.0776558	-0.116737	-0.345447	0.0394718	0.0610892	-0.225131	-0.101236	-0.00657239
BXD69	CD	0.126852	-0.081227	-0.1148	0.0669378	0.00752895	-0.0788975	-0.0471664	-0.116761	0.0521021	-0.0623666	0.144795	0.127495	0.109892	-0.142598	0.152549	0.131472	-0.278911	-0.191791	-0.0111357	-0.179813	0.137518	-0.20851	0.0459114	-0.211321	0.0913981	0.107932	-0.0442379	0.196526	0.208295	0.0828031	-0.177909	0.0581545	0.0300607	-0.190938	-0.144095	-0.202257	-0.252509	0.044289	-0.136678	-0.03063	0.186515	0.0597113	-0.18561	-0.0256633	0.0607072
BXD71	CD	-0.0571469	0.0875137	0.208509	0.144429	0.159934	-0.303777	-0.215281	-0.0191915	-0.222817	-0.165072	-0.0732957	-0.129854	0.00287807	0.239997	-0.0524392	-0.280201	0.00135634	0.19146	-0.178287	0.274531	-0.364775	0.236705	0.133381	0.0827782	-0.280035	-0.187828	-0.190907	-0.014992	-0.0191272	0.0221344	-0.0859261	0.0220095	-0.0189828	0.126655	0.00585387	-0.213185	-0.0516727	-0.27757	0.213676	-0.120622	0.240285	-0.069169	-0.0387349	-0.272195	-0.133218
BXD73	CD	-0.0232767	0.0475717	0.0842275	-0.0367848	0.117502	-0.0925931	-0.0215039	0.115335	-0.0136322	-0.162174	-0.132073	-0.0124188	0.0424386	0.154242	-0.0912874	-0.195839	0.165507	0.201885	-0.155212	0.116722	-0.189899	-0.025494	0.129961	0.231365	-0.196108	-0.137169	0.128643	-0.00270608	0.0078027	-0.189087	0.0748305	0.15856	0.123983	-0.0143197	-0.142702	0.103816	0.128168	0.00540317	-0.0404869	-0.16563	-0.0105174	0.0329224	0.00588196	-0.0213037	0.118477
BXD73a	CD	7.33415e-05	0.105916	0.0757841	-0.0323546	0.125926	-0.210763	-0.0799245	0.106373	-0.0356825	-0.143498	-0.252573	-0.0880497	-0.0180467	0.134985	-0.0941187	-0.14338	0.0484933	0.168107	-0.155627	0.142139	-0.196174	0.0440346	0.112241	0.16277	-0.26482	-0.187177	0.0442376	0.176975	-0.0537253	-0.168307	0.0628549	0.123197	0.0839771	0.0582421	-0.0365059	-0.0401838	0.049208	-0.0997125	-0.0483506	-0.124404	-0.00992756	0.0758247	-0.105675	-0.131223	-0.0191129
BXD73b	CD	-0.168563	-0.188127	0.0970255	0.0578479	0.153758	0.106523	0.157569	0.145789	0.122357	-0.147006	-0.0167197	0.153064	0.144404	0.0923301	0.108196	0.182419	-0.262021	0.0968832	0.141819	0.00765113	0.190873	-0.085199	-0.0338338	-0.0720701	0.108715	0.304756	0.0733715	-0.046758	-0.168503	0.404275	-0.152933	-0.0472642	0.180863	0.0284119	-0.0963808	0.0435187	0.0214762	-0.0613542	-0.03786	-0.0608821	-0.223768	-0.0778809	-0.126724	0.135471	0.0905043
BXD75	CD	-0.127555	0.0617838	0.223268	0.0808971	0.196513	-0.239932	-0.10491	0.17161	-0.0745697	-0.17052	-0.119017	-0.104288	0.00833936	0.220138	-0.0350042	-0.130943	0.166539	0.259465	-0.119575	0.20842	-0.174362	0.136217	-0.183555	0.21894	-0.219829	-0.153069	0.0619461	-0.0988823	-0.0938104	-0.139995	0.07594	-0.0177071	0.0758956	0.0699319	0.0115017	-0.0086565	0.0878422	-0.0392267	0.115277	0.124952	-0.0797941	0.0195209	0.0595322	-0.0741493	-0.0816289
BXD79	CD	-0.219533	-0.0875395	0.36464	0.358614	0.203984	-0.261625	-0.225797	-0.0649484	-0.244213	-0.0143751	0.026401	-0.127344	0.0592797	0.337475	0.143613	-0.184944	-0.0590907	0.200622	-0.00685449	0.498508	-0.291301	0.464061	0.00266458	0.0051837	-0.215222	-0.0243126	-0.278387	-0.140193	-0.0913594	0.261348	-0.140837	-0.101999	-0.176144	0.115418	0.25797	-0.184956	-0.0411768	-0.292752	0.499313	0.0843044	-0.176156	-0.174963	-0.0970812	-0.12375	-0.309463
BXD8	CD	0.0941497	0.00296524	-0.247952	-0.184149	-0.111897	0.192589	0.128501	-0.150242	-0.136297	0.0283985	0.051152	-0.0849875	-0.212697	0.0690025	-0.105191	0.0961082	0.01262	-0.182342	-0.187585	-0.0998173	0.0881909	0.0302684	0.109795	-0.0470745	-0.00408573	-0.0741	0.0611612	-0.144208	0.0200539	-0.0278697	-0.0359819	-0.0676901	-0.0688302	0.230782	0.00301626	-0.0307987	0.0916379	0.0718547	-0.188349	-0.133397	0.261339	-0.157471	0.0100532	-0.0339753	0.00283188
BXD81	CD	-0.222555	-0.154872	0.243277	0.130043	0.18181	-0.114545	0.0586507	0.2392	0.152941	-0.134321	-0.0278025	0.0174702	0.168199	0.137795	0.0795514	0.0830711	0.163918	0.248977	0.139159	0.184847	-0.045506	0.0528864	-0.0107893	0.205961	-0.0313705	0.103997	0.0885829	-0.0885345	-0.170527	-0.0434262	0.181749	0.367954	0.132166	-0.101328	0.0657436	0.129425	0.0422599	0.0365277	0.1666	-0.0514712	-0.0503664	-0.0163192	0.117967	0.131269	0.0708913
BXD83	CD	-0.216709	-0.0907609	0.056343	-0.085524	0.0919249	0.125448	0.206337	0.231179	0.181876	-0.165771	-0.152243	0.102674	0.0419467	0.0727046	-0.029315	0.0867596	0.0760487	0.179678	0.0788588	0.0620405	0.183966	-0.090715	-0.235074	0.219105	0.0574088	0.215171	0.195586	-0.134972	-0.163154	-0.0140159	0.111034	-0.110477	0.166756	-0.196983	-0.138467	0.244529	0.293851	0.297196	-0.0885314	0.201906	0.12464	0.0267498	-0.07566	0.264537	0.135551
BXD84	CD	-0.213232	-0.134643	0.22231	0.275596	0.241641	-0.0922573	-0.153832	-0.0256002	-0.13802	-0.195894	0.198289	0.02677	0.0583462	0.342594	0.199923	0.0795145	-0.104284	0.111699	-0.0547588	0.269727	-0.00134921	0.253692	-0.205717	-0.0872559	-0.134839	0.181553	-0.0013872	0.0963384	0.111459	0.144092	-0.228194	-0.0938645	0.0236086	0.111281	-0.00380817	-0.176371	-0.100497	-0.125622	0.289635	-0.0333456	0.0117329	-0.146508	-0.166119	0.0563596	-0.152463
BXD85	CD	-0.0993013	-0.0390162	0.0876419	0.0990371	-0.12469	0.037863	0.0771611	0.164481	0.130938	0.133486	-0.0102007	0.0738954	0.183101	-0.191541	0.0606253	0.0486422	0.113504	0.0963559	0.255853	-0.0885622	-0.112366	-0.0497047	0.0844617	0.000471268	0.155124	-0.168434	-0.107648	0.209679	-0.137964	0.0612851	0.231257	0.239482	-0.0278477	-0.179721	0.0948161	0.154319	-0.0965666	-0.0658184	-0.00638207	-0.095071	-0.164176	-0.0306386	0.102522	-0.172837	-0.0268082
BXD87	CD	-0.140987	-0.0679965	0.0853412	0.16012	0.185273	0.00317611	0.103466	0.0664892	0.120803	-0.148015	0.189202	0.230781	0.183945	0.0685933	0.238644	0.238851	-0.0154362	0.00601111	0.0492385	-0.0634705	0.133471	-0.134981	0.020635	0.0300036	0.0997773	0.122082	0.141979	0.156768	-0.109068	-0.0457541	0.0627831	-0.0968324	0.211863	-0.130369	-0.0996193	0.0398697	-0.106908	0.0305672	-0.0131421	-0.262053	-0.1153	-0.16213	-0.125628	0.109372	0.064787
BXD89	CD	0.0155553	0.174102	0.00882787	-0.137839	-0.162068	-0.0366552	-0.0188824	0.0934033	0.0278309	0.187602	-0.212283	-0.109768	-0.0517517	-0.135011	-0.151977	-0.122789	0.114751	0.114023	0.149744	0.0295414	-0.0411443	0.0382967	0.223421	0.136638	-0.0435514	-0.0853505	0.000184107	0.0772945	0.183487	-0.198964	0.205749	-0.0995046	-0.122307	-0.189874	0.232661	0.133937	0.1453	0.162606	-0.0706357	0.188633	-0.0798687	0.0856405	0.143417	0.0821891	-0.117577
BXD90	CD	-0.191202	-0.251112	0.100854	0.0447328	0.0487879	0.170966	0.260697	0.291221	0.291735	0.0323086	0.0360169	0.18515	0.205464	-0.0648171	-0.0589369	0.0758033	0.228401	0.166063	0.28048	-0.0688866	0.0755781	-0.11502	-0.0316821	0.200644	0.231196	-0.0363525	0.130485	0.163736	-0.203503	-0.107783	0.352173	0.0365629	0.183715	-0.178894	0.00631941	0.296435	0.13709	0.121528	-0.00362633	-0.00412714	-0.238346	-0.0577594	0.18502	0.157414	0.133176
BXD95	CD	-0.0759131	-0.00937191	0.112352	0.127142	0.114459	-0.0398869	-0.0826223	-0.004475	-0.091948	-0.0837559	0.187182	0.121297	-0.0133013	0.123146	0.0652187	-0.0273413	-0.0309092	0.0285319	-0.096313	0.0455004	-0.00139534	0.0502443	-0.205245	-0.0965953	0.0667681	0.0488033	0.0314632	-0.191513	-0.0691271	0.184835	-0.101607	-0.120646	0.0606095	0.00183018	-0.019591	-0.0969703	-0.0190092	-0.0371016	0.155232	0.0268655	0.153286	0.0373347	0.0967005	0.00741733	-0.131188
BXD98	CD	-0.0786416	0.0147019	0.0884404	-0.0386376	0.107407	-0.231619	-0.116503	0.155655	0.0309758	-0.146773	-0.17606	-0.100716	0.0558106	0.0690761	-0.0595851	-0.155555	-0.041422	0.18733	-0.216378	0.139403	-0.12637	-0.0484892	0.0643919	0.156469	-0.301369	-0.06757	0.150581	0.227945	-0.058748	-0.0888164	0.00252521	0.0488426	0.0817157	0.159783	-0.169454	-0.0844522	0.0902323	0.149083	-0.0601829	0.0652027	-0.160959	0.109216	-0.220497	0.0336566	-0.122547
BXD99	CD	-0.265701	-0.220005	0.319888	0.349018	0.19856	-0.252323	0.00216642	0.254841	0.24294	-0.0599	0.110584	0.112438	0.346786	0.105018	0.288991	0.21275	-0.0783001	0.220031	0.23477	0.172478	-0.145595	0.0540322	-0.083798	0.0892999	-0.071415	0.0135173	-0.153378	0.0707243	-0.181139	0.159565	0.0927873	0.446451	0.209341	-0.139149	0.0116613	0.00450775	-0.200971	-0.198101	0.230163	-0.0557009	-0.0670281	-0.0892229	-0.196336	-0.156396	0.0329374
