# Supplementary material for: Genetic and dietary modulators of the inflammatory response in the gastrointestinal tract of the BXD mouse genetic reference population
Source: eLife. 2023 Oct 19;12:RP87569. doi: 10.7554/eLife.87569 (PMC10586803; doi:10.7554/eLife.87569)
Supplement: Supplementary file 2. — Related to Figure 5. [file elife-87569-supp2.xlsx]

## Sheet: Candidate genes under ModQTL
gene_name	Chromosome	Start	End	Module	QTL peak (start)	QTL peak (end)	Diets	Highimpact variants	Tissue
Abcc1	16	14.3616	14.4757	HFD_M28	3.5	73.7188	HFD	no	Proximal colon
Btla	16	45.2243	45.2577	HFD_M28	3.5	73.7188	HFD	yes	Proximal colon
Ccdc80	16	45.0934	45.1281	HFD_M28	3.5	73.7188	HFD	yes	Proximal colon
Cd200	16	45.3821	45.4091	HFD_M28	3.5	73.7188	HFD	yes	Proximal colon
Ciita	16	10.4801	10.5284	HFD_M28	3.5	73.7188	HFD	yes	Proximal colon
Clec16a	16	10.5453	10.7449	HFD_M28	3.5	73.7188	HFD	yes	Proximal colon
Dtx3l	16	35.9265	35.9392	HFD_M28	3.5	73.7188	HFD	yes	Proximal colon
Epha3	16	63.5435	63.8642	HFD_M28	3.5	73.7188	HFD	yes	Proximal colon
Epha6	16	59.6535	60.6055	HFD_M28	3.5	73.7188	HFD	yes	Proximal colon
Gpr15	16	58.7174	58.7191	HFD_M28	3.5	73.7188	HFD	yes	Proximal colon
Hcls1	16	36.935	36.9632	HFD_M28	3.5	73.7188	HFD	yes	Proximal colon
Igsf11	16	38.8927	39.0272	HFD_M28	3.5	73.7188	HFD	yes	Proximal colon
Muc4	16	32.7359	32.7824	HFD_M28	3.5	73.7188	HFD	yes	Proximal colon
Mylk	16	34.7452	35.0024	HFD_M28	3.5	73.7188	HFD	yes	Proximal colon
Pak2	16	32.0163	32.0793	HFD_M28	3.5	73.7188	HFD	no	Proximal colon
Parp14	16	35.8329	35.8715	HFD_M28	3.5	73.7188	HFD	yes	Proximal colon
Parp9	16	35.9385	35.9726	HFD_M28	3.5	73.7188	HFD	yes	Proximal colon
Pdxdc1	16	13.8331	13.9031	HFD_M28	3.5	73.7188	HFD	yes	Proximal colon
Pigx	16	32.0844	32.0997	HFD_M28	3.5	73.7188	HFD	yes	Proximal colon
Pla1a	16	38.3961	38.4331	HFD_M28	3.5	73.7188	HFD	yes	Proximal colon
Pla2g10	16	13.7151	13.731	HFD_M28	3.5	73.7188	HFD	yes	Proximal colon
Rubcn	16	32.8217	32.8778	HFD_M28	3.5	73.7188	HFD	yes	Proximal colon
Sidt1	16	44.2402	44.3332	HFD_M28	3.5	73.7188	HFD	yes	Proximal colon
Slc15a2	16	36.7502	36.785	HFD_M28	3.5	73.7188	HFD	yes	Proximal colon
Tm4sf19	16	32.4005	32.4082	HFD_M28	3.5	73.7188	HFD	yes	Proximal colon
Tnk2	16	32.6439	32.6835	HFD_M28	3.5	73.7188	HFD	yes	Proximal colon
Zdhhc19	16	32.4963	32.562	HFD_M28	3.5	73.7188	HFD	yes	Proximal colon
AA914427	16	17.922	17.9232	HFD_M28	3.5	73.7188	HFD	no	Proximal colon
Abat	16	8.51343	8.62157	HFD_M28	3.5	73.7188	HFD	no	Proximal colon
Abcc5	16	20.3313	20.4264	HFD_M28	3.5	73.7188	HFD	no	Proximal colon
Abcf3	16	20.5486	20.5614	HFD_M28	3.5	73.7188	HFD	no	Proximal colon
Abhd10	16	45.7297	45.743	HFD_M28	3.5	73.7188	HFD	yes	Proximal colon
Abi3bp	16	56.4779	56.6901	HFD_M28	3.5	73.7188	HFD	yes	Proximal colon
Acap2	16	31.0924	31.2012	HFD_M28	3.5	73.7188	HFD	no	Proximal colon
Adcy5	16	35.1549	35.3057	HFD_M28	3.5	73.7188	HFD	no	Proximal colon
Adcy9	16	4.28753	4.4205	HFD_M28	3.5	73.7188	HFD	no	Proximal colon
Adgrg7	16	56.7246	56.7959	HFD_M28	3.5	73.7188	HFD	no	Proximal colon
Adipoq	16	23.1465	23.158	HFD_M28	3.5	73.7188	HFD	no	Proximal colon
Adprh	16	38.444	38.4527	HFD_M28	3.5	73.7188	HFD	no	Proximal colon
Ahsg	16	22.8913	22.8994	HFD_M28	3.5	73.7188	HFD	no	Proximal colon
Aifm3	16	17.4896	17.5075	HFD_M28	3.5	73.7188	HFD	no	Proximal colon
Alcam	16	52.249	52.4541	HFD_M28	3.5	73.7188	HFD	no	Proximal colon
Alg1	16	5.23362	5.24491	HFD_M28	3.5	73.7188	HFD	no	Proximal colon
Alg3	16	20.6054	20.6117	HFD_M28	3.5	73.7188	HFD	no	Proximal colon
Anks3	16	4.94144	4.9642	HFD_M28	3.5	73.7188	HFD	no	Proximal colon
Ap2m1	16	20.5355	20.5449	HFD_M28	3.5	73.7188	HFD	no	Proximal colon
Apod	16	31.2962	31.3148	HFD_M28	3.5	73.7188	HFD	no	Proximal colon
Arhgap31	16	38.5983	38.7133	HFD_M28	3.5	73.7188	HFD	no	Proximal colon
Arl13b	16	62.7937	62.847	HFD_M28	3.5	73.7188	HFD	no	Proximal colon
Arl6	16	59.6129	59.6394	HFD_M28	3.5	73.7188	HFD	yes	Proximal colon
Arvcf	16	18.3482	18.4071	HFD_M28	3.5	73.7188	HFD	no	Proximal colon
Atf7ip2	16	10.1927	10.2515	HFD_M28	3.5	73.7188	HFD	no	Proximal colon
Atg3	16	45.1588	45.1885	HFD_M28	3.5	73.7188	HFD	no	Proximal colon
Atp13a3	16	30.3124	30.406	HFD_M28	3.5	73.7188	HFD	no	Proximal colon
Atp13a4	16	29.3959	29.5449	HFD_M28	3.5	73.7188	HFD	no	Proximal colon
Atp13a5	16	29.2319	29.3787	HFD_M28	3.5	73.7188	HFD	yes	Proximal colon
Atp6v1a	16	44.0854	44.1397	HFD_M28	3.5	73.7188	HFD	no	Proximal colon
AU015336	16	26.0318	26.0413	HFD_M28	3.5	73.7188	HFD	no	Proximal colon
AU021092	16	5.21182	5.2223	HFD_M28	3.5	73.7188	HFD	no	Proximal colon
B3gnt5	16	19.7602	19.7728	HFD_M28	3.5	73.7188	HFD	no	Proximal colon
B4galt4	16	38.7423	38.769	HFD_M28	3.5	73.7188	HFD	no	Proximal colon
Bbx	16	50.1918	50.4324	HFD_M28	3.5	73.7188	HFD	no	Proximal colon
BC002163	16	42.9556	42.9559	HFD_M28	3.5	73.7188	HFD	no	Proximal colon
BC016579	16	45.6268	45.6541	HFD_M28	3.5	73.7188	HFD	yes	Proximal colon
BC100530	16	36.3594	36.3677	HFD_M28	3.5	73.7188	HFD	no	Proximal colon
BC106179	16	23.2207	23.2255	HFD_M28	3.5	73.7188	HFD	no	Proximal colon
BC117090	16	36.3217	36.3343	HFD_M28	3.5	73.7188	HFD	no	Proximal colon
Bcl6	16	23.9651	23.9889	HFD_M28	3.5	73.7188	HFD	no	Proximal colon
Bdh1	16	31.4223	31.4589	HFD_M28	3.5	73.7188	HFD	no	Proximal colon
Bex6	16	32.1798	32.187	HFD_M28	3.5	73.7188	HFD	yes	Proximal colon
Bfar	16	13.6719	13.7036	HFD_M28	3.5	73.7188	HFD	no	Proximal colon
Boc	16	44.485	44.5589	HFD_M28	3.5	73.7188	HFD	yes	Proximal colon
C87114	16	12.4083	12.4092	HFD_M28	3.5	73.7188	HFD	no	Proximal colon
Cadm2	16	66.6554	67.6209	HFD_M28	3.5	73.7188	HFD	no	Proximal colon
Camk2n2	16	20.6192	20.6213	HFD_M28	3.5	73.7188	HFD	no	Proximal colon
Car15	16	17.8353	17.8384	HFD_M28	3.5	73.7188	HFD	no	Proximal colon
Carhsp1	16	8.65858	8.67216	HFD_M28	3.5	73.7188	HFD	no	Proximal colon
Casr	16	36.4937	36.5621	HFD_M28	3.5	73.7188	HFD	no	Proximal colon
Cblb	16	52.0312	52.208	HFD_M28	3.5	73.7188	HFD	no	Proximal colon
Ccdc116	16	17.1391	17.1472	HFD_M28	3.5	73.7188	HFD	no	Proximal colon
Ccdc14	16	34.6906	34.7252	HFD_M28	3.5	73.7188	HFD	yes	Proximal colon
Ccdc188	16	18.2179	18.2203	HFD_M28	3.5	73.7188	HFD	no	Proximal colon
Ccdc191	16	43.8898	43.9643	HFD_M28	3.5	73.7188	HFD	yes	Proximal colon
Ccdc50	16	27.3889	27.4522	HFD_M28	3.5	73.7188	HFD	no	Proximal colon
Ccdc54	16	50.5899	50.5912	HFD_M28	3.5	73.7188	HFD	no	Proximal colon
Ccdc58	16	36.0717	36.0921	HFD_M28	3.5	73.7188	HFD	no	Proximal colon
Ccdc74a	16	17.6465	17.6507	HFD_M28	3.5	73.7188	HFD	no	Proximal colon
Cd200r1	16	44.7657	44.795	HFD_M28	3.5	73.7188	HFD	no	Proximal colon
Cd200r2	16	44.8671	44.9158	HFD_M28	3.5	73.7188	HFD	no	Proximal colon
Cd200r3	16	44.9437	44.9814	HFD_M28	3.5	73.7188	HFD	no	Proximal colon
Cd200r4	16	44.8117	44.8391	HFD_M28	3.5	73.7188	HFD	no	Proximal colon
Cd47	16	49.8005	49.915	HFD_M28	3.5	73.7188	HFD	no	Proximal colon
Cd80	16	38.4556	38.4963	HFD_M28	3.5	73.7188	HFD	no	Proximal colon
Cd86	16	36.6039	36.6661	HFD_M28	3.5	73.7188	HFD	no	Proximal colon
Cd96	16	46.0357	46.1203	HFD_M28	3.5	73.7188	HFD	no	Proximal colon
Cdc45	16	18.7804	18.812	HFD_M28	3.5	73.7188	HFD	no	Proximal colon
Cdip1	16	4.75035	4.79029	HFD_M28	3.5	73.7188	HFD	no	Proximal colon
Cebpd	16	15.8873	15.891	HFD_M28	3.5	73.7188	HFD	no	Proximal colon
Cep19	16	32.0998	32.1081	HFD_M28	3.5	73.7188	HFD	no	Proximal colon
Cep97	16	55.8999	55.9349	HFD_M28	3.5	73.7188	HFD	no	Proximal colon
Cfap44	16	44.3948	44.4824	HFD_M28	3.5	73.7188	HFD	yes	Proximal colon
Cggbp1	16	64.852	64.8595	HFD_M28	3.5	73.7188	HFD	no	Proximal colon
Chmp2b	16	65.5391	65.5627	HFD_M28	3.5	73.7188	HFD	no	Proximal colon
Chrd	16	20.7331	20.7424	HFD_M28	3.5	73.7188	HFD	no	Proximal colon
Cip2a	16	48.9942	49.0197	HFD_M28	3.5	73.7188	HFD	no	Proximal colon
Clcn2	16	20.703	20.7177	HFD_M28	3.5	73.7188	HFD	no	Proximal colon
Cldn1	16	26.3566	26.3718	HFD_M28	3.5	73.7188	HFD	no	Proximal colon
Cldn16	16	26.4631	26.4828	HFD_M28	3.5	73.7188	HFD	no	Proximal colon
Cldn5	16	18.7768	18.7783	HFD_M28	3.5	73.7188	HFD	no	Proximal colon
Cldnd1	16	58.7279	58.7343	HFD_M28	3.5	73.7188	HFD	no	Proximal colon
Cluap1	16	3.9088	3.94115	HFD_M28	3.5	73.7188	HFD	no	Proximal colon
Cmss1	16	57.302	57.6069	HFD_M28	3.5	73.7188	HFD	yes	Proximal colon
Col8a1	16	57.6243	57.7547	HFD_M28	3.5	73.7188	HFD	no	Proximal colon
Comt	16	18.4069	18.4269	HFD_M28	3.5	73.7188	HFD	no	Proximal colon
Coro7	16	4.62613	4.67978	HFD_M28	3.5	73.7188	HFD	no	Proximal colon
Cox17	16	38.347	38.3528	HFD_M28	3.5	73.7188	HFD	no	Proximal colon
Cpn2	16	30.2564	30.2675	HFD_M28	3.5	73.7188	HFD	no	Proximal colon
Cpox	16	58.6703	58.7176	HFD_M28	3.5	73.7188	HFD	no	Proximal colon
Cpped1	16	11.8037	11.9094	HFD_M28	3.5	73.7188	HFD	no	Proximal colon
Crebbp	16	4.08133	4.214	HFD_M28	3.5	73.7188	HFD	no	Proximal colon
Crkl	16	17.452	17.4874	HFD_M28	3.5	73.7188	HFD	no	Proximal colon
Crybg3	16	59.4908	59.601	HFD_M28	3.5	73.7188	HFD	yes	Proximal colon
Crygs	16	22.8052	22.8116	HFD_M28	3.5	73.7188	HFD	no	Proximal colon
Csnka2ip	16	64.4778	64.6024	HFD_M28	3.5	73.7188	HFD	no	Proximal colon
Csta1	16	36.1199	36.1312	HFD_M28	3.5	73.7188	HFD	no	Proximal colon
Cyp2ab1	16	20.3084	20.3254	HFD_M28	3.5	73.7188	HFD	no	Proximal colon
Dcbld2	16	58.4084	58.4697	HFD_M28	3.5	73.7188	HFD	no	Proximal colon
Dexi	16	10.5025	10.5431	HFD_M28	3.5	73.7188	HFD	no	Proximal colon
Dgcr2	16	17.8395	17.8986	HFD_M28	3.5	73.7188	HFD	no	Proximal colon
Dgcr6	16	18.0529	18.0716	HFD_M28	3.5	73.7188	HFD	no	Proximal colon
Dgcr8	16	18.2539	18.2892	HFD_M28	3.5	73.7188	HFD	no	Proximal colon
Dgkg	16	22.4685	22.6572	HFD_M28	3.5	73.7188	HFD	no	Proximal colon
Dirc2	16	35.6941	35.7694	HFD_M28	3.5	73.7188	HFD	yes	Proximal colon
Dlg1	16	31.6634	31.8751	HFD_M28	3.5	73.7188	HFD	no	Proximal colon
Dnaja3	16	4.63999	4.7077	HFD_M28	3.5	73.7188	HFD	no	Proximal colon
Dnajb11	16	22.8578	22.8796	HFD_M28	3.5	73.7188	HFD	no	Proximal colon
Dnase1	16	4.03694	4.04002	HFD_M28	3.5	73.7188	HFD	no	Proximal colon
Dnm1l	16	16.3122	16.359	HFD_M28	3.5	73.7188	HFD	no	Proximal colon
Dppa2	16	48.3039	48.3197	HFD_M28	3.5	73.7188	HFD	no	Proximal colon
Dppa4	16	48.2837	48.2942	HFD_M28	3.5	73.7188	HFD	no	Proximal colon
Drd3	16	43.754	43.8229	HFD_M28	3.5	73.7188	HFD	no	Proximal colon
Dubr	16	50.7193	50.7328	HFD_M28	3.5	73.7188	HFD	no	Proximal colon
Dvl3	16	20.517	20.534	HFD_M28	3.5	73.7188	HFD	no	Proximal colon
Dzip3	16	48.9242	48.9942	HFD_M28	3.5	73.7188	HFD	no	Proximal colon
Eaf2	16	36.7929	36.875	HFD_M28	3.5	73.7188	HFD	no	Proximal colon
Ece2	16	20.6298	20.6465	HFD_M28	3.5	73.7188	HFD	no	Proximal colon
Eef1akmt4	16	20.6116	20.619	HFD_M28	3.5	73.7188	HFD	no	Proximal colon
Eef2kmt	16	5.24415	5.25598	HFD_M28	3.5	73.7188	HFD	no	Proximal colon
Efcab1	16	14.9066	14.9814	HFD_M28	3.5	73.7188	HFD	no	Proximal colon
Ehhadh	16	21.7613	21.7878	HFD_M28	3.5	73.7188	HFD	no	Proximal colon
Eif2b5	16	20.4988	20.5093	HFD_M28	3.5	73.7188	HFD	no	Proximal colon
Eif4a2	16	23.1074	23.1141	HFD_M28	3.5	73.7188	HFD	no	Proximal colon
Eif4g1	16	20.6683	20.6929	HFD_M28	3.5	73.7188	HFD	no	Proximal colon
Emp2	16	10.2817	10.314	HFD_M28	3.5	73.7188	HFD	no	Proximal colon
Ephb3	16	21.2048	21.2233	HFD_M28	3.5	73.7188	HFD	no	Proximal colon
Ercc4	16	13.1097	13.1506	HFD_M28	3.5	73.7188	HFD	no	Proximal colon
Ess2	16	17.9007	17.9113	HFD_M28	3.5	73.7188	HFD	no	Proximal colon
Etv5	16	22.3813	22.4397	HFD_M28	3.5	73.7188	HFD	no	Proximal colon
Fam131a	16	20.6932	20.703	HFD_M28	3.5	73.7188	HFD	no	Proximal colon
Fam162a	16	36.0438	36.0716	HFD_M28	3.5	73.7188	HFD	no	Proximal colon
Fam43a	16	30.5997	30.6028	HFD_M28	3.5	73.7188	HFD	no	Proximal colon
Fbxo40	16	36.9635	36.9905	HFD_M28	3.5	73.7188	HFD	no	Proximal colon
Fbxo45	16	32.2301	32.2472	HFD_M28	3.5	73.7188	HFD	no	Proximal colon
Fetub	16	22.9183	22.9398	HFD_M28	3.5	73.7188	HFD	no	Proximal colon
Fgd4	16	16.4169	16.6005	HFD_M28	3.5	73.7188	HFD	no	Proximal colon
Fgf12	16	28.1601	28.7531	HFD_M28	3.5	73.7188	HFD	no	Proximal colon
Filip1l	16	57.3531	57.5731	HFD_M28	3.5	73.7188	HFD	yes	Proximal colon
Fopnl	16	14.2992	14.3174	HFD_M28	3.5	73.7188	HFD	yes	Proximal colon
Fstl1	16	37.7769	37.8365	HFD_M28	3.5	73.7188	HFD	no	Proximal colon
Fyttd1	16	32.8775	32.9089	HFD_M28	3.5	73.7188	HFD	yes	Proximal colon
Gabrr3	16	59.4073	59.4645	HFD_M28	3.5	73.7188	HFD	yes	Proximal colon
Gap43	16	42.2484	42.3407	HFD_M28	3.5	73.7188	HFD	no	Proximal colon
Gbe1	16	70.3139	70.5697	HFD_M28	3.5	73.7188	HFD	yes	Proximal colon
Gcsam	16	45.6104	45.6229	HFD_M28	3.5	73.7188	HFD	no	Proximal colon
Glis2	16	4.59471	4.62492	HFD_M28	3.5	73.7188	HFD	no	Proximal colon
Glyr1	16	5.01391	5.04986	HFD_M28	3.5	73.7188	HFD	no	Proximal colon
Gnb1l	16	18.4987	18.5667	HFD_M28	3.5	73.7188	HFD	no	Proximal colon
Gng5-ps	16	22.295	22.2952	HFD_M28	3.5	73.7188	HFD	no	Proximal colon
Golgb1	16	36.8751	36.9331	HFD_M28	3.5	73.7188	HFD	no	Proximal colon
Gp1bb	16	18.6203	18.6224	HFD_M28	3.5	73.7188	HFD	no	Proximal colon
Gp5	16	30.3077	30.3108	HFD_M28	3.5	73.7188	HFD	no	Proximal colon
Gpr156	16	37.9165	38.0075	HFD_M28	3.5	73.7188	HFD	no	Proximal colon
Gramd1c	16	43.9804	44.0633	HFD_M28	3.5	73.7188	HFD	yes	Proximal colon
Grin2a	16	9.5679	9.99556	HFD_M28	3.5	73.7188	HFD	no	Proximal colon
Gsc2	16	17.9131	17.9151	HFD_M28	3.5	73.7188	HFD	no	Proximal colon
Gsk3b	16	38.089	38.2461	HFD_M28	3.5	73.7188	HFD	no	Proximal colon
Gspt1	16	11.2193	11.2543	HFD_M28	3.5	73.7188	HFD	no	Proximal colon
Gtf2e1	16	37.5098	37.5398	HFD_M28	3.5	73.7188	HFD	no	Proximal colon
Gtpbp8	16	44.7368	44.7464	HFD_M28	3.5	73.7188	HFD	no	Proximal colon
Hacd2	16	35.0224	35.1092	HFD_M28	3.5	73.7188	HFD	no	Proximal colon
Heg1	16	33.6844	33.7716	HFD_M28	3.5	73.7188	HFD	yes	Proximal colon
Hes1	16	30.0644	30.0678	HFD_M28	3.5	73.7188	HFD	no	Proximal colon
Hgd	16	37.5802	37.632	HFD_M28	3.5	73.7188	HFD	no	Proximal colon
Hic2	16	17.2336	17.2634	HFD_M28	3.5	73.7188	HFD	no	Proximal colon
Hira	16	18.877	18.9703	HFD_M28	3.5	73.7188	HFD	no	Proximal colon
Hmgb1-ps6	16	31.9913	31.9919	HFD_M28	3.5	73.7188	HFD	no	Proximal colon
Hmox2	16	4.72636	4.76674	HFD_M28	3.5	73.7188	HFD	no	Proximal colon
Hrasls	16	29.2097	29.2305	HFD_M28	3.5	73.7188	HFD	no	Proximal colon
Hrg	16	22.9511	22.9617	HFD_M28	3.5	73.7188	HFD	no	Proximal colon
Hspbap1	16	35.7704	35.8285	HFD_M28	3.5	73.7188	HFD	yes	Proximal colon
Htr1f	16	64.9247	65.1059	HFD_M28	3.5	73.7188	HFD	no	Proximal colon
Ifitm7	16	13.9817	13.9869	HFD_M28	3.5	73.7188	HFD	no	Proximal colon
Ift57	16	49.6992	49.7651	HFD_M28	3.5	73.7188	HFD	no	Proximal colon
Igf2bp2	16	22.059	22.1633	HFD_M28	3.5	73.7188	HFD	no	Proximal colon
Iglc1	16	19.0616	19.0621	HFD_M28	3.5	73.7188	HFD	no	Proximal colon
Iglc2	16	19.1984	19.2004	HFD_M28	3.5	73.7188	HFD	no	Proximal colon
Iglc3	16	19.0652	19.0657	HFD_M28	3.5	73.7188	HFD	no	Proximal colon
Iglc4	16	19.195	19.1953	HFD_M28	3.5	73.7188	HFD	no	Proximal colon
Iglj1	16	19.0632	19.0633	HFD_M28	3.5	73.7188	HFD	no	Proximal colon
Iglj2	16	19.2002	19.2002	HFD_M28	3.5	73.7188	HFD	no	Proximal colon
Iglj3	16	19.067	19.0671	HFD_M28	3.5	73.7188	HFD	no	Proximal colon
Iglj3p	16	19.0664	19.0664	HFD_M28	3.5	73.7188	HFD	no	Proximal colon
Iglj4	16	19.1965	19.1965	HFD_M28	3.5	73.7188	HFD	no	Proximal colon
Igll1	16	16.8607	16.864	HFD_M28	3.5	73.7188	HFD	no	Proximal colon
Iglv1	16	19.085	19.0855	HFD_M28	3.5	73.7188	HFD	no	Proximal colon
Iglv2	16	19.2604	19.2609	HFD_M28	3.5	73.7188	HFD	no	Proximal colon
Iglv3	16	19.2412	19.2417	HFD_M28	3.5	73.7188	HFD	no	Proximal colon
Il1rap	16	26.5817	26.7301	HFD_M28	3.5	73.7188	HFD	no	Proximal colon
Ildr1	16	36.694	36.7268	HFD_M28	3.5	73.7188	HFD	no	Proximal colon
Impg2	16	56.2043	56.2738	HFD_M28	3.5	73.7188	HFD	yes	Proximal colon
Iqcb1	16	36.8284	36.8727	HFD_M28	3.5	73.7188	HFD	no	Proximal colon
Iqcg	16	33.0127	33.0562	HFD_M28	3.5	73.7188	HFD	no	Proximal colon
Itgb5	16	33.8297	33.9493	HFD_M28	3.5	73.7188	HFD	no	Proximal colon
Kalrn	16	33.9691	34.5735	HFD_M28	3.5	73.7188	HFD	no	Proximal colon
Klhl22	16	17.7596	17.7934	HFD_M28	3.5	73.7188	HFD	no	Proximal colon
Klhl24	16	20.0975	20.1292	HFD_M28	3.5	73.7188	HFD	no	Proximal colon
Klhl6	16	19.9465	19.983	HFD_M28	3.5	73.7188	HFD	no	Proximal colon
Kng1	16	23.0579	23.0821	HFD_M28	3.5	73.7188	HFD	no	Proximal colon
Kng2	16	22.9859	23.0295	HFD_M28	3.5	73.7188	HFD	no	Proximal colon
Kpna1	16	35.9787	36.0371	HFD_M28	3.5	73.7188	HFD	no	Proximal colon
Lamp3	16	19.6534	19.7064	HFD_M28	3.5	73.7188	HFD	no	Proximal colon
Liph	16	21.9538	21.9957	HFD_M28	3.5	73.7188	HFD	no	Proximal colon
Litaf	16	10.9593	11.0662	HFD_M28	3.5	73.7188	HFD	no	Proximal colon
Lmln	16	33.0625	33.1277	HFD_M28	3.5	73.7188	HFD	yes	Proximal colon
Lnp1	16	56.9143	56.9281	HFD_M28	3.5	73.7188	HFD	no	Proximal colon
Lpp	16	24.3935	24.9926	HFD_M28	3.5	73.7188	HFD	no	Proximal colon
Lppos	16	24.3916	24.3936	HFD_M28	3.5	73.7188	HFD	no	Proximal colon
Lrch3	16	32.9141	33.0156	HFD_M28	3.5	73.7188	HFD	no	Proximal colon
Lrrc15	16	30.2693	30.2833	HFD_M28	3.5	73.7188	HFD	no	Proximal colon
Lrrc58	16	37.8684	37.8889	HFD_M28	3.5	73.7188	HFD	no	Proximal colon
Lrrc74b	16	17.5445	17.5612	HFD_M28	3.5	73.7188	HFD	no	Proximal colon
Lsamp	16	39.9844	42.1817	HFD_M28	3.5	73.7188	HFD	no	Proximal colon
Lsg1	16	30.5605	30.5876	HFD_M28	3.5	73.7188	HFD	no	Proximal colon
Lztr1	16	17.5087	17.5263	HFD_M28	3.5	73.7188	HFD	no	Proximal colon
Maats1	16	38.2978	38.3421	HFD_M28	3.5	73.7188	HFD	no	Proximal colon
Maats1os	16	38.3026	38.305	HFD_M28	3.5	73.7188	HFD	no	Proximal colon
Map3k13	16	21.7943	21.9334	HFD_M28	3.5	73.7188	HFD	no	Proximal colon
Map6d1	16	20.2333	20.2414	HFD_M28	3.5	73.7188	HFD	no	Proximal colon
Mapk1	16	16.9834	17.0475	HFD_M28	3.5	73.7188	HFD	no	Proximal colon
Marf1	16	14.1092	14.1634	HFD_M28	3.5	73.7188	HFD	no	Proximal colon
Masp1	16	23.4494	23.5208	HFD_M28	3.5	73.7188	HFD	no	Proximal colon
Mb21d2	16	28.8262	28.9297	HFD_M28	3.5	73.7188	HFD	no	Proximal colon
Mcm4	16	15.6239	15.6374	HFD_M28	3.5	73.7188	HFD	no	Proximal colon
Med15	16	17.6512	17.7329	HFD_M28	3.5	73.7188	HFD	no	Proximal colon
Mefv	16	3.70722	3.7181	HFD_M28	3.5	73.7188	HFD	no	Proximal colon
Meltf	16	31.8788	31.899	HFD_M28	3.5	73.7188	HFD	yes	Proximal colon
Mettl22	16	8.47079	8.49068	HFD_M28	3.5	73.7188	HFD	no	Proximal colon
Mgrn1	16	4.88625	4.9383	HFD_M28	3.5	73.7188	HFD	no	Proximal colon
Mir1224	16	20.6045	20.6045	HFD_M28	3.5	73.7188	HFD	no	Proximal colon
Mir1306	16	18.2842	18.2843	HFD_M28	3.5	73.7188	HFD	no	Proximal colon
Mir130b	16	17.1241	17.1241	HFD_M28	3.5	73.7188	HFD	no	Proximal colon
Mir185	16	18.3274	18.3275	HFD_M28	3.5	73.7188	HFD	no	Proximal colon
Mir193b	16	13.4495	13.4496	HFD_M28	3.5	73.7188	HFD	no	Proximal colon
Mir1945	16	11.2544	11.2544	HFD_M28	3.5	73.7188	HFD	no	Proximal colon
Mir1946a	16	32.2674	32.2676	HFD_M28	3.5	73.7188	HFD	no	Proximal colon
Mir1947	16	33.1054	33.1054	HFD_M28	3.5	73.7188	HFD	no	Proximal colon
Mir28a	16	24.8279	24.8279	HFD_M28	3.5	73.7188	HFD	no	Proximal colon
Mir301b	16	17.1244	17.1245	HFD_M28	3.5	73.7188	HFD	no	Proximal colon
Mir3081	16	44.558	44.5581	HFD_M28	3.5	73.7188	HFD	no	Proximal colon
Mir3470b	16	44.0139	44.014	HFD_M28	3.5	73.7188	HFD	no	Proximal colon
Mir365-1	16	13.4538	13.4539	HFD_M28	3.5	73.7188	HFD	no	Proximal colon
Mir484	16	14.1596	14.1597	HFD_M28	3.5	73.7188	HFD	no	Proximal colon
Mir5118	16	55.4947	55.4948	HFD_M28	3.5	73.7188	HFD	no	Proximal colon
Mir568	16	43.6407	43.6407	HFD_M28	3.5	73.7188	HFD	no	Proximal colon
Mir6362	16	22.6053	22.6054	HFD_M28	3.5	73.7188	HFD	no	Proximal colon
Mir6363	16	50.7271	50.7272	HFD_M28	3.5	73.7188	HFD	no	Proximal colon
Mir6364	16	5.21579	5.21587	HFD_M28	3.5	73.7188	HFD	no	Proximal colon
Mir6365	16	13.4711	13.4712	HFD_M28	3.5	73.7188	HFD	no	Proximal colon
Mir6366	16	18.1651	18.1652	HFD_M28	3.5	73.7188	HFD	no	Proximal colon
Mir6540	16	42.3034	42.3035	HFD_M28	3.5	73.7188	HFD	no	Proximal colon
Mir690	16	28.5999	28.6	HFD_M28	3.5	73.7188	HFD	no	Proximal colon
Mir7680	16	21.256	21.2561	HFD_M28	3.5	73.7188	HFD	no	Proximal colon
Mir8095	16	22.5321	22.5322	HFD_M28	3.5	73.7188	HFD	no	Proximal colon
Mkl2	16	13.2565	13.4175	HFD_M28	3.5	73.7188	HFD	yes	Proximal colon
Morc1	16	48.4312	48.6309	HFD_M28	3.5	73.7188	HFD	no	Proximal colon
Mpv17l	16	13.9032	13.9496	HFD_M28	3.5	73.7188	HFD	no	Proximal colon
Mrpl40	16	18.872	18.8769	HFD_M28	3.5	73.7188	HFD	no	Proximal colon
Muc13	16	33.794	33.8199	HFD_M28	3.5	73.7188	HFD	no	Proximal colon
Muc20	16	32.7774	32.7974	HFD_M28	3.5	73.7188	HFD	no	Proximal colon
Myh11	16	14.1945	14.2914	HFD_M28	3.5	73.7188	HFD	no	Proximal colon
Myh15	16	49.0575	49.1991	HFD_M28	3.5	73.7188	HFD	no	Proximal colon
Mzt2	16	15.8484	15.8634	HFD_M28	3.5	73.7188	HFD	no	Proximal colon
n-R5s30	16	5.32404	5.32416	HFD_M28	3.5	73.7188	HFD	no	Proximal colon
n-R5s31	16	16.0109	16.011	HFD_M28	3.5	73.7188	HFD	no	Proximal colon
n-R5s32	16	30.1418	30.1419	HFD_M28	3.5	73.7188	HFD	no	Proximal colon
n-R5s33	16	33.0019	33.002	HFD_M28	3.5	73.7188	HFD	no	Proximal colon
n-R5s34	16	37.8548	37.8549	HFD_M28	3.5	73.7188	HFD	no	Proximal colon
n-R5s36	16	48.4103	48.4104	HFD_M28	3.5	73.7188	HFD	no	Proximal colon
n-R5s37	16	61.373	61.3731	HFD_M28	3.5	73.7188	HFD	no	Proximal colon
Naa50	16	44.1398	44.1634	HFD_M28	3.5	73.7188	HFD	no	Proximal colon
Naa60	16	3.87237	3.90478	HFD_M28	3.5	73.7188	HFD	no	Proximal colon
Nagpa	16	5.19529	5.20401	HFD_M28	3.5	73.7188	HFD	no	Proximal colon
Ncbp2	16	31.9485	31.9618	HFD_M28	3.5	73.7188	HFD	no	Proximal colon
Nde1	16	14.1633	14.1929	HFD_M28	3.5	73.7188	HFD	no	Proximal colon
Ndufa11b	16	22.0535	22.0539	HFD_M28	3.5	73.7188	HFD	no	Proximal colon
Ndufb4	16	37.6472	37.6545	HFD_M28	3.5	73.7188	HFD	no	Proximal colon
Nectin3	16	46.3877	46.4985	HFD_M28	3.5	73.7188	HFD	no	Proximal colon
Nepro	16	44.7243	44.7373	HFD_M28	3.5	73.7188	HFD	no	Proximal colon
Nfkbiz	16	55.8114	55.8389	HFD_M28	3.5	73.7188	HFD	no	Proximal colon
Nit2	16	57.1567	57.1673	HFD_M28	3.5	73.7188	HFD	no	Proximal colon
Nlrc3	16	3.94501	3.97663	HFD_M28	3.5	73.7188	HFD	no	Proximal colon
Nmral1	16	4.71006	4.71936	HFD_M28	3.5	73.7188	HFD	no	Proximal colon
Nr1i2	16	38.2483	38.2948	HFD_M28	3.5	73.7188	HFD	no	Proximal colon
Nrros	16	32.1428	32.1656	HFD_M28	3.5	73.7188	HFD	yes	Proximal colon
Nsun3	16	62.7324	62.7868	HFD_M28	3.5	73.7188	HFD	no	Proximal colon
Ntan1	16	13.8188	13.8355	HFD_M28	3.5	73.7188	HFD	no	Proximal colon
Nubp1	16	10.4119	10.4244	HFD_M28	3.5	73.7188	HFD	no	Proximal colon
Nudt16l1	16	4.93876	4.94103	HFD_M28	3.5	73.7188	HFD	no	Proximal colon
Nxpe3	16	55.84	55.8953	HFD_M28	3.5	73.7188	HFD	no	Proximal colon
Olfr15	16	3.83088	3.84475	HFD_M28	3.5	73.7188	HFD	no	Proximal colon
Olfr161	16	3.59104	3.59932	HFD_M28	3.5	73.7188	HFD	no	Proximal colon
Olfr162-ps1	16	3.60193	3.60286	HFD_M28	3.5	73.7188	HFD	no	Proximal colon
Olfr163-ps1	16	3.61785	3.61879	HFD_M28	3.5	73.7188	HFD	no	Proximal colon
Olfr164	16	19.2841	19.3141	HFD_M28	3.5	73.7188	HFD	no	Proximal colon
Olfr165	16	19.4062	19.4231	HFD_M28	3.5	73.7188	HFD	no	Proximal colon
Olfr166	16	19.4837	19.4899	HFD_M28	3.5	73.7188	HFD	no	Proximal colon
Olfr167	16	19.5096	19.5223	HFD_M28	3.5	73.7188	HFD	no	Proximal colon
Olfr168	16	19.5293	19.5356	HFD_M28	3.5	73.7188	HFD	no	Proximal colon
Olfr169	16	19.5649	19.5718	HFD_M28	3.5	73.7188	HFD	no	Proximal colon
Olfr170	16	19.6057	19.6119	HFD_M28	3.5	73.7188	HFD	no	Proximal colon
Olfr171	16	19.6239	19.6299	HFD_M28	3.5	73.7188	HFD	no	Proximal colon
Olfr172	16	58.7595	58.7632	HFD_M28	3.5	73.7188	HFD	yes	Proximal colon
Olfr173	16	58.7952	58.8003	HFD_M28	3.5	73.7188	HFD	yes	Proximal colon
Olfr175-ps1	16	58.8237	58.8268	HFD_M28	3.5	73.7188	HFD	yes	Proximal colon
Olfr177	16	58.871	58.8748	HFD_M28	3.5	73.7188	HFD	yes	Proximal colon
Olfr178	16	58.8883	58.8921	HFD_M28	3.5	73.7188	HFD	yes	Proximal colon
Olfr180	16	58.9143	58.9294	HFD_M28	3.5	73.7188	HFD	yes	Proximal colon
Olfr181	16	58.9247	58.9288	HFD_M28	3.5	73.7188	HFD	yes	Proximal colon
Olfr183	16	58.9954	59.0014	HFD_M28	3.5	73.7188	HFD	yes	Proximal colon
Olfr184-ps1	16	59.0066	59.0074	HFD_M28	3.5	73.7188	HFD	no	Proximal colon
Olfr185-ps1	16	59.021	59.0229	HFD_M28	3.5	73.7188	HFD	no	Proximal colon
Olfr186	16	59.0258	59.0303	HFD_M28	3.5	73.7188	HFD	no	Proximal colon
Olfr187	16	59.0356	59.0398	HFD_M28	3.5	73.7188	HFD	yes	Proximal colon
Olfr188-ps1	16	59.0469	59.0542	HFD_M28	3.5	73.7188	HFD	no	Proximal colon
Olfr189-ps1	16	59.0636	59.0644	HFD_M28	3.5	73.7188	HFD	no	Proximal colon
Olfr19	16	16.6722	16.6764	HFD_M28	3.5	73.7188	HFD	no	Proximal colon
Olfr190	16	59.0671	59.078	HFD_M28	3.5	73.7188	HFD	yes	Proximal colon
Olfr191	16	59.0828	59.0898	HFD_M28	3.5	73.7188	HFD	yes	Proximal colon
Olfr192	16	59.098	59.1019	HFD_M28	3.5	73.7188	HFD	no	Proximal colon
Olfr193	16	59.1079	59.1119	HFD_M28	3.5	73.7188	HFD	no	Proximal colon
Olfr194	16	59.1165	59.1211	HFD_M28	3.5	73.7188	HFD	yes	Proximal colon
Olfr195	16	59.147	59.1508	HFD_M28	3.5	73.7188	HFD	no	Proximal colon
Olfr196	16	59.1666	59.1705	HFD_M28	3.5	73.7188	HFD	yes	Proximal colon
Olfr197	16	59.1852	59.1899	HFD_M28	3.5	73.7188	HFD	no	Proximal colon
Olfr198	16	59.2004	59.2035	HFD_M28	3.5	73.7188	HFD	no	Proximal colon
Olfr199	16	59.2141	59.2198	HFD_M28	3.5	73.7188	HFD	yes	Proximal colon
Olfr200-ps1	16	59.2551	59.256	HFD_M28	3.5	73.7188	HFD	no	Proximal colon
Olfr201	16	59.2661	59.2726	HFD_M28	3.5	73.7188	HFD	no	Proximal colon
Olfr202	16	59.2835	59.2868	HFD_M28	3.5	73.7188	HFD	no	Proximal colon
Olfr203	16	59.2989	59.3044	HFD_M28	3.5	73.7188	HFD	yes	Proximal colon
Olfr204	16	59.3102	59.3182	HFD_M28	3.5	73.7188	HFD	yes	Proximal colon
Olfr205	16	59.328	59.3311	HFD_M28	3.5	73.7188	HFD	yes	Proximal colon
Olfr206	16	59.3447	59.3492	HFD_M28	3.5	73.7188	HFD	no	Proximal colon
Olfr209	16	59.3612	59.364	HFD_M28	3.5	73.7188	HFD	yes	Proximal colon
Opa1	16	29.5793	29.6549	HFD_M28	3.5	73.7188	HFD	no	Proximal colon
Osbpl11	16	33.1851	33.2433	HFD_M28	3.5	73.7188	HFD	no	Proximal colon
Ostn	16	27.3075	27.3512	HFD_M28	3.5	73.7188	HFD	no	Proximal colon
P2rx6	16	17.5619	17.5778	HFD_M28	3.5	73.7188	HFD	no	Proximal colon
P3h2	16	25.9593	26.1058	HFD_M28	3.5	73.7188	HFD	no	Proximal colon
Pam16	16	4.61646	4.62499	HFD_M28	3.5	73.7188	HFD	no	Proximal colon
Parl	16	20.2798	20.3024	HFD_M28	3.5	73.7188	HFD	no	Proximal colon
Parn	16	13.538	13.6682	HFD_M28	3.5	73.7188	HFD	yes	Proximal colon
Pcnp	16	56.0072	56.0297	HFD_M28	3.5	73.7188	HFD	no	Proximal colon
Pcyt1a	16	32.4309	32.4751	HFD_M28	3.5	73.7188	HFD	no	Proximal colon
Pdia5	16	35.3973	35.4909	HFD_M28	3.5	73.7188	HFD	no	Proximal colon
Phldb2	16	45.7462	45.9536	HFD_M28	3.5	73.7188	HFD	no	Proximal colon
Pi4ka	16	17.2804	17.4063	HFD_M28	3.5	73.7188	HFD	no	Proximal colon
Pigz	16	31.9339	31.946	HFD_M28	3.5	73.7188	HFD	no	Proximal colon
Pkp2	16	16.2133	16.2727	HFD_M28	3.5	73.7188	HFD	no	Proximal colon
Pla2g10os	16	13.7298	13.7395	HFD_M28	3.5	73.7188	HFD	no	Proximal colon
Plcxd2	16	45.9593	46.0102	HFD_M28	3.5	73.7188	HFD	no	Proximal colon
Pmm2	16	8.63767	8.66247	HFD_M28	3.5	73.7188	HFD	no	Proximal colon
Poglut1	16	38.5251	38.5503	HFD_M28	3.5	73.7188	HFD	no	Proximal colon
Polq	16	37.0118	37.0954	HFD_M28	3.5	73.7188	HFD	no	Proximal colon
Polr2h	16	20.7177	20.7223	HFD_M28	3.5	73.7188	HFD	no	Proximal colon
Popdc2	16	38.3622	38.3782	HFD_M28	3.5	73.7188	HFD	no	Proximal colon
Pou1f1	16	65.5205	65.535	HFD_M28	3.5	73.7188	HFD	no	Proximal colon
Ppil2	16	17.0866	17.1113	HFD_M28	3.5	73.7188	HFD	no	Proximal colon
Ppl	16	5.08629	5.13242	HFD_M28	3.5	73.7188	HFD	no	Proximal colon
Ppm1f	16	16.8965	16.9274	HFD_M28	3.5	73.7188	HFD	no	Proximal colon
Ppp1r2	16	31.2515	31.2753	HFD_M28	3.5	73.7188	HFD	no	Proximal colon
Prkdc	16	15.6379	15.8422	HFD_M28	3.5	73.7188	HFD	no	Proximal colon
Prm1	16	10.7963	10.8058	HFD_M28	3.5	73.7188	HFD	no	Proximal colon
Prm2	16	10.7914	10.7961	HFD_M28	3.5	73.7188	HFD	no	Proximal colon
Prm3	16	10.7905	10.7909	HFD_M28	3.5	73.7188	HFD	yes	Proximal colon
Prodh	16	18.0604	18.0902	HFD_M28	3.5	73.7188	HFD	no	Proximal colon
Pros1	16	62.8543	62.9293	HFD_M28	3.5	73.7188	HFD	no	Proximal colon
Psmd2	16	20.6517	20.6634	HFD_M28	3.5	73.7188	HFD	no	Proximal colon
Qtrt2	16	43.8614	43.9268	HFD_M28	3.5	73.7188	HFD	no	Proximal colon
Rabl3	16	37.5399	37.5724	HFD_M28	3.5	73.7188	HFD	no	Proximal colon
Ranbp1	16	18.2398	18.2487	HFD_M28	3.5	73.7188	HFD	no	Proximal colon
Rbfox1	16	5.88535	7.41153	HFD_M28	3.5	73.7188	HFD	no	Proximal colon
Retnla	16	48.8426	48.8445	HFD_M28	3.5	73.7188	HFD	no	Proximal colon
Retnlb	16	48.8169	48.8189	HFD_M28	3.5	73.7188	HFD	no	Proximal colon
Retnlg	16	48.8726	48.8745	HFD_M28	3.5	73.7188	HFD	no	Proximal colon
Rfc4	16	23.1139	23.1277	HFD_M28	3.5	73.7188	HFD	no	Proximal colon
Rimbp3	16	17.2086	17.214	HFD_M28	3.5	73.7188	HFD	no	Proximal colon
Riox2	16	59.4718	59.4925	HFD_M28	3.5	73.7188	HFD	yes	Proximal colon
Rmi2	16	10.8351	10.893	HFD_M28	3.5	73.7188	HFD	no	Proximal colon
Rnf168	16	32.2775	32.3014	HFD_M28	3.5	73.7188	HFD	no	Proximal colon
Robo1	16	72.3083	73.0461	HFD_M28	3.5	73.7188	HFD	no	Proximal colon
Rogdi	16	5.00873	5.01355	HFD_M28	3.5	73.7188	HFD	no	Proximal colon
Ropn1	16	34.6499	34.6786	HFD_M28	3.5	73.7188	HFD	yes	Proximal colon
Rpl24	16	55.9663	55.9714	HFD_M28	3.5	73.7188	HFD	no	Proximal colon
Rpl26-ps4	16	17.7117	17.7121	HFD_M28	3.5	73.7188	HFD	no	Proximal colon
Rpl31-ps12	16	16.8197	16.8201	HFD_M28	3.5	73.7188	HFD	no	Proximal colon
Rpl35a	16	33.0565	33.0602	HFD_M28	3.5	73.7188	HFD	no	Proximal colon
Rpl39l	16	10.1702	10.1749	HFD_M28	3.5	73.7188	HFD	no	Proximal colon
Rps10-ps2	16	20.8221	20.8226	HFD_M28	3.5	73.7188	HFD	no	Proximal colon
Rrn3	16	13.7807	13.8148	HFD_M28	3.5	73.7188	HFD	no	Proximal colon
Rsl1d1	16	11.193	11.2033	HFD_M28	3.5	73.7188	HFD	no	Proximal colon
Rtl10	16	18.4989	18.5017	HFD_M28	3.5	73.7188	HFD	no	Proximal colon
Rtn4r	16	18.1276	18.1524	HFD_M28	3.5	73.7188	HFD	no	Proximal colon
Rtp1	16	23.4291	23.434	HFD_M28	3.5	73.7188	HFD	no	Proximal colon
Rtp2	16	23.9255	23.9324	HFD_M28	3.5	73.7188	HFD	no	Proximal colon
Rtp4	16	23.5203	23.6142	HFD_M28	3.5	73.7188	HFD	no	Proximal colon
Scarf2	16	17.7973	17.8083	HFD_M28	3.5	73.7188	HFD	no	Proximal colon
Sdf2l1	16	17.1301	17.1324	HFD_M28	3.5	73.7188	HFD	no	Proximal colon
Sec14l5	16	5.14711	5.18727	HFD_M28	3.5	73.7188	HFD	no	Proximal colon
Sec22a	16	35.3111	35.3639	HFD_M28	3.5	73.7188	HFD	no	Proximal colon
Sema5b	16	35.5411	35.6647	HFD_M28	3.5	73.7188	HFD	yes	Proximal colon
Senp2	16	22.0095	22.0493	HFD_M28	3.5	73.7188	HFD	no	Proximal colon
Senp5	16	31.9597	32.0033	HFD_M28	3.5	73.7188	HFD	no	Proximal colon
Senp7	16	56.0483	56.19	HFD_M28	3.5	73.7188	HFD	no	Proximal colon
2012-09-01	16	4.98686	4.99785	HFD_M28	3.5	73.7188	HFD	no	Proximal colon
2005-09-01	16	18.6205	18.63	HFD_M28	3.5	73.7188	HFD	no	Proximal colon
Serpind1	16	17.3314	17.3436	HFD_M28	3.5	73.7188	HFD	no	Proximal colon
Shisa9	16	11.9841	12.2709	HFD_M28	3.5	73.7188	HFD	yes	Proximal colon
Slc12a8	16	33.5173	33.6641	HFD_M28	3.5	73.7188	HFD	no	Proximal colon
Slc25a1	16	17.9252	17.9282	HFD_M28	3.5	73.7188	HFD	no	Proximal colon
Slc35a5	16	45.1396	45.1587	HFD_M28	3.5	73.7188	HFD	no	Proximal colon
Slc51a	16	32.4745	32.4879	HFD_M28	3.5	73.7188	HFD	no	Proximal colon
Slc7a4	16	17.572	17.5832	HFD_M28	3.5	73.7188	HFD	no	Proximal colon
Slc9c1	16	45.5353	45.607	HFD_M28	3.5	73.7188	HFD	yes	Proximal colon
Slx4	16	3.97911	4.00377	HFD_M28	3.5	73.7188	HFD	no	Proximal colon
Smbd1	16	32.8048	32.8105	HFD_M28	3.5	73.7188	HFD	no	Proximal colon
Smco1	16	32.2715	32.2748	HFD_M28	3.5	73.7188	HFD	no	Proximal colon
Smim22	16	5.00729	5.00831	HFD_M28	3.5	73.7188	HFD	no	Proximal colon
Smpd4	16	17.6194	17.6448	HFD_M28	3.5	73.7188	HFD	no	Proximal colon
Snai2	16	14.7059	14.7094	HFD_M28	3.5	73.7188	HFD	no	Proximal colon
Snap29	16	17.406	17.4308	HFD_M28	3.5	73.7188	HFD	no	Proximal colon
Snn	16	11.0609	11.075	HFD_M28	3.5	73.7188	HFD	no	Proximal colon
Snora81	16	23.1108	23.1109	HFD_M28	3.5	73.7188	HFD	no	Proximal colon
Snord2	16	23.109	23.109	HFD_M28	3.5	73.7188	HFD	no	Proximal colon
Snord66	16	20.6842	20.6843	HFD_M28	3.5	73.7188	HFD	no	Proximal colon
Snx29	16	11.3229	11.7555	HFD_M28	3.5	73.7188	HFD	no	Proximal colon
Snx4	16	33.2514	33.3003	HFD_M28	3.5	73.7188	HFD	no	Proximal colon
Socs1	16	10.7822	10.7855	HFD_M28	3.5	73.7188	HFD	no	Proximal colon
Spag6l	16	16.753	16.8295	HFD_M28	3.5	73.7188	HFD	no	Proximal colon
Speer2	16	69.8569	69.8637	HFD_M28	3.5	73.7188	HFD	no	Proximal colon
Spice1	16	44.3471	44.3885	HFD_M28	3.5	73.7188	HFD	yes	Proximal colon
Spidr	16	15.8892	16.1469	HFD_M28	3.5	73.7188	HFD	no	Proximal colon
Srl	16	4.48022	4.54182	HFD_M28	3.5	73.7188	HFD	no	Proximal colon
Sst	16	23.8896	23.891	HFD_M28	3.5	73.7188	HFD	no	Proximal colon
St3gal6	16	58.4681	58.5242	HFD_M28	3.5	73.7188	HFD	no	Proximal colon
St6gal1	16	23.2247	23.3604	HFD_M28	3.5	73.7188	HFD	no	Proximal colon
Stfa1	16	36.277	36.2854	HFD_M28	3.5	73.7188	HFD	no	Proximal colon
Stfa2	16	36.404	36.4085	HFD_M28	3.5	73.7188	HFD	no	Proximal colon
Stfa2l1	16	36.1568	36.162	HFD_M28	3.5	73.7188	HFD	no	Proximal colon
Stfa3	16	36.4505	36.4554	HFD_M28	3.5	73.7188	HFD	no	Proximal colon
Stx19	16	62.8147	62.8243	HFD_M28	3.5	73.7188	HFD	no	Proximal colon
Stxbp5l	16	37.1149	37.385	HFD_M28	3.5	73.7188	HFD	yes	Proximal colon
Tagln3	16	45.7112	45.7246	HFD_M28	3.5	73.7188	HFD	no	Proximal colon
Tango2	16	18.3008	18.3481	HFD_M28	3.5	73.7188	HFD	no	Proximal colon
Tbc1d23	16	57.1689	57.2315	HFD_M28	3.5	73.7188	HFD	no	Proximal colon
Tbccd1	16	22.8132	22.8577	HFD_M28	3.5	73.7188	HFD	no	Proximal colon
Tbx1	16	18.581	18.5907	HFD_M28	3.5	73.7188	HFD	no	Proximal colon
Tctex1d2	16	32.4197	32.4291	HFD_M28	3.5	73.7188	HFD	no	Proximal colon
Tdgf1-ps1	16	3.73051	3.73102	HFD_M28	3.5	73.7188	HFD	no	Proximal colon
Teddm3	16	21.1527	21.154	HFD_M28	3.5	73.7188	HFD	no	Proximal colon
Tekt5	16	10.3579	10.3955	HFD_M28	3.5	73.7188	HFD	no	Proximal colon
Tfap4	16	4.54466	4.55985	HFD_M28	3.5	73.7188	HFD	no	Proximal colon
Tfg	16	56.6903	56.7174	HFD_M28	3.5	73.7188	HFD	no	Proximal colon
Tfrc	16	32.6089	32.6328	HFD_M28	3.5	73.7188	HFD	no	Proximal colon
Thap7	16	17.528	17.5311	HFD_M28	3.5	73.7188	HFD	no	Proximal colon
Thpo	16	20.7245	20.7345	HFD_M28	3.5	73.7188	HFD	no	Proximal colon
Tigit	16	43.6489	43.6641	HFD_M28	3.5	73.7188	HFD	no	Proximal colon
Timmdc1	16	38.4983	38.5227	HFD_M28	3.5	73.7188	HFD	no	Proximal colon
Tmem114	16	8.40927	8.42514	HFD_M28	3.5	73.7188	HFD	no	Proximal colon
Tmem186	16	8.63323	8.63771	HFD_M28	3.5	73.7188	HFD	no	Proximal colon
Tmem191c	16	17.2761	17.2832	HFD_M28	3.5	73.7188	HFD	no	Proximal colon
Tmem207	16	26.5037	26.5268	HFD_M28	3.5	73.7188	HFD	no	Proximal colon
Tmem30c	16	57.2661	57.2929	HFD_M28	3.5	73.7188	HFD	no	Proximal colon
Tmem39a	16	38.5587	38.5922	HFD_M28	3.5	73.7188	HFD	no	Proximal colon
Tmem41a	16	21.9343	21.9476	HFD_M28	3.5	73.7188	HFD	no	Proximal colon
Tmem44	16	30.5119	30.5508	HFD_M28	3.5	73.7188	HFD	no	Proximal colon
Tmem45a	16	56.8052	56.8862	HFD_M28	3.5	73.7188	HFD	no	Proximal colon
Tmem45a2	16	57.037	57.0714	HFD_M28	3.5	73.7188	HFD	no	Proximal colon
Tmprss7	16	45.6563	45.6937	HFD_M28	3.5	73.7188	HFD	yes	Proximal colon
Tnfrsf17	16	11.3138	11.3201	HFD_M28	3.5	73.7188	HFD	no	Proximal colon
Tnk2os	16	32.6652	32.6682	HFD_M28	3.5	73.7188	HFD	no	Proximal colon
Tnp2	16	10.7879	10.7887	HFD_M28	3.5	73.7188	HFD	no	Proximal colon
Tomm70a	16	57.1217	57.1567	HFD_M28	3.5	73.7188	HFD	no	Proximal colon
Top3b	16	16.8707	16.893	HFD_M28	3.5	73.7188	HFD	no	Proximal colon
Tprg	16	25.2868	25.4223	HFD_M28	3.5	73.7188	HFD	no	Proximal colon
Tra2b	16	22.2445	22.266	HFD_M28	3.5	73.7188	HFD	no	Proximal colon
Trap1	16	4.03997	4.07783	HFD_M28	3.5	73.7188	HFD	no	Proximal colon
Trat1	16	48.7308	48.772	HFD_M28	3.5	73.7188	HFD	no	Proximal colon
Trmt10c	16	56.0326	56.0378	HFD_M28	3.5	73.7188	HFD	no	Proximal colon
Trmt2a	16	18.2487	18.2548	HFD_M28	3.5	73.7188	HFD	no	Proximal colon
Trp63	16	25.6838	25.8921	HFD_M28	3.5	73.7188	HFD	no	Proximal colon
Tssk1	16	17.8942	17.8979	HFD_M28	3.5	73.7188	HFD	no	Proximal colon
Tssk2	16	17.8986	17.9	HFD_M28	3.5	73.7188	HFD	no	Proximal colon
Tvp23a	16	10.4206	10.4474	HFD_M28	3.5	73.7188	HFD	no	Proximal colon
Txndc11	16	11.0749	11.1347	HFD_M28	3.5	73.7188	HFD	yes	Proximal colon
Txnrd2	16	18.4264	18.4791	HFD_M28	3.5	73.7188	HFD	no	Proximal colon
Ubald1	16	4.87478	4.88032	HFD_M28	3.5	73.7188	HFD	no	Proximal colon
Ube2l3	16	17.152	17.2026	HFD_M28	3.5	73.7188	HFD	no	Proximal colon
Ube2v2	16	15.5521	15.5958	HFD_M28	3.5	73.7188	HFD	no	Proximal colon
Ubn1	16	5.05006	5.08629	HFD_M28	3.5	73.7188	HFD	no	Proximal colon
Ubxn7	16	32.3323	32.3937	HFD_M28	3.5	73.7188	HFD	no	Proximal colon
Ufd1	16	18.8118	18.8353	HFD_M28	3.5	73.7188	HFD	no	Proximal colon
Umps	16	33.9548	33.967	HFD_M28	3.5	73.7188	HFD	no	Proximal colon
Upk1b	16	38.7732	38.8003	HFD_M28	3.5	73.7188	HFD	no	Proximal colon
Usf3	16	44.1732	44.2275	HFD_M28	3.5	73.7188	HFD	no	Proximal colon
Usp7	16	8.6896	8.79231	HFD_M28	3.5	73.7188	HFD	no	Proximal colon
Uts2b	16	27.3533	27.3702	HFD_M28	3.5	73.7188	HFD	yes	Proximal colon
Vasn	16	4.63994	4.6508	HFD_M28	3.5	73.7188	HFD	no	Proximal colon
Vgll3	16	65.8153	65.8664	HFD_M28	3.5	73.7188	HFD	no	Proximal colon
Vpreb1	16	16.8684	16.8708	HFD_M28	3.5	73.7188	HFD	no	Proximal colon
Vpreb2	16	17.9804	17.9813	HFD_M28	3.5	73.7188	HFD	no	Proximal colon
Vps8	16	21.4231	21.6447	HFD_M28	3.5	73.7188	HFD	no	Proximal colon
Vwa5b2	16	20.5895	20.6054	HFD_M28	3.5	73.7188	HFD	no	Proximal colon
Wdr53	16	32.2472	32.2571	HFD_M28	3.5	73.7188	HFD	no	Proximal colon
Wdr5b	16	36.0412	36.0439	HFD_M28	3.5	73.7188	HFD	yes	Proximal colon
Xxylt1	16	30.9551	31.0814	HFD_M28	3.5	73.7188	HFD	no	Proximal colon
Yars2	16	16.303	16.3096	HFD_M28	3.5	73.7188	HFD	no	Proximal colon
Ydjc	16	17.1446	17.1607	HFD_M28	3.5	73.7188	HFD	no	Proximal colon
Yeats2	16	20.1411	20.2326	HFD_M28	3.5	73.7188	HFD	no	Proximal colon
Ypel1	16	17.0697	17.087	HFD_M28	3.5	73.7188	HFD	no	Proximal colon
Zbtb11	16	55.9739	56.0089	HFD_M28	3.5	73.7188	HFD	no	Proximal colon
Zbtb11os1	16	55.9733	55.9746	HFD_M28	3.5	73.7188	HFD	no	Proximal colon
Zbtb20	16	42.8759	43.6426	HFD_M28	3.5	73.7188	HFD	no	Proximal colon
Zc3h7a	16	11.1366	11.1764	HFD_M28	3.5	73.7188	HFD	yes	Proximal colon
Zdhhc23	16	43.965	43.9798	HFD_M28	3.5	73.7188	HFD	no	Proximal colon
Zdhhc8	16	18.2208	18.2351	HFD_M28	3.5	73.7188	HFD	no	Proximal colon
Zfp148	16	33.3808	33.5044	HFD_M28	3.5	73.7188	HFD	no	Proximal colon
Zfp174	16	3.84727	3.85888	HFD_M28	3.5	73.7188	HFD	no	Proximal colon
Zfp263	16	3.74409	3.75079	HFD_M28	3.5	73.7188	HFD	no	Proximal colon
Zfp597	16	3.85832	3.88456	HFD_M28	3.5	73.7188	HFD	no	Proximal colon
Zfp654	16	64.7803	64.8517	HFD_M28	3.5	73.7188	HFD	no	Proximal colon
Zpld1	16	55.2252	55.298	HFD_M28	3.5	73.7188	HFD	no	Proximal colon
