# Supplementary material for: Genetic and dietary modulators of the inflammatory response in the gastrointestinal tract of the BXD mouse genetic reference population
Source: eLife. 2023 Oct 19;12:RP87569. doi: 10.7554/eLife.87569 (PMC10586803; doi:10.7554/eLife.87569)
Supplement: Supplementary file 3. — Related to Figure 5 and its Figure 5—figure supplement 1. [file elife-87569-supp3.xlsx]

## Sheet: UKBB_candidate_gene_singleV_WGS
ID	CHROM.x	POS	REF	ALT	SYMBOL	consequence_all	consequence_mostSevere	consequence_mostSevere_impact	consequence_mostSevere_var_category	LoF_bestPrediction	five_prime_UTR_cons_all	five_prime_UTR_cons_mostSevere	REVEL_all	REVEL_max	SIFT_prediction_all	SIFT_prediction_mostSevere	PolyPhen_prediction_all	PolyPhen_prediction_mostSevere	var_consequence	CHROM.y	GENPOS	ALLELE0	ALLELE1	A1FREQ	INFO	N	TEST	BETA	SE	CHISQ	LOG10P	EXTRA	trait
3:96809839:T:C	3	96809839	T	C	EPHA6	upstream_gene_variant	upstream_gene_variant	modifier	intergenic_variant	NA	NA	NA	NA	NA	NA	NA	NA	NA	upstream_gene_variant	3	96809839	T	C	1.45159e-05	1	172225	ADD	3.80442	1.39841	7.40125	2.1859	NA	UC
3:96810372:C:T	3	96810372	C	T	EPHA6	upstream_gene_variant	upstream_gene_variant	modifier	intergenic_variant	NA	NA	NA	NA	NA	NA	NA	NA	NA	upstream_gene_variant	3	96810372	C	T	0.000101611	1	172225	ADD	2.75307	0.792834	12.0578	3.28756	NA	CD
3:96810573:A:C	3	96810573	A	C	EPHA6	upstream_gene_variant	upstream_gene_variant	modifier	intergenic_variant	NA	NA	NA	NA	NA	NA	NA	NA	NA	upstream_gene_variant	3	96810573	A	C	1.74192e-05	1	172224	ADD	3.58128	1.31782	7.38528	2.18204	NA	UC
3:96810714:T:A	3	96810714	T	A	EPHA6	upstream_gene_variant	upstream_gene_variant	modifier	intergenic_variant	NA	NA	NA	NA	NA	NA	NA	NA	NA	upstream_gene_variant	3	96810714	T	A	2.03223e-05	1	172225	ADD	3.12795	1.03976	9.05016	2.58059	NA	UC
3:96811281:G:C	3	96811281	G	C	EPHA6	upstream_gene_variant	upstream_gene_variant	modifier	intergenic_variant	NA	NA	NA	NA	NA	NA	NA	NA	NA	upstream_gene_variant	3	96811281	G	C	1.16127e-05	1	172225	ADD	3.55055	1.33606	7.06215	2.10386	NA	CD
3:96812326:A:G	3	96812326	A	G	EPHA6	upstream_gene_variant	upstream_gene_variant	modifier	intergenic_variant	NA	NA	NA	NA	NA	NA	NA	NA	NA	upstream_gene_variant	3	96812326	A	G	2.32254e-05	1	172225	ADD	3.69285	1.32595	7.75656	2.2715	NA	CD
3:96812619:G:A	3	96812619	G	A	EPHA6	upstream_gene_variant	upstream_gene_variant	modifier	intergenic_variant	NA	NA	NA	NA	NA	NA	NA	NA	NA	upstream_gene_variant	3	96812619	G	A	1.74191e-05	1	172225	ADD	4.10481	1.09318	14.0994	3.76096	NA	UC
3:96813095:G:T	3	96813095	G	T	EPHA6	upstream_gene_variant	upstream_gene_variant	modifier	intergenic_variant	NA	NA	NA	NA	NA	NA	NA	NA	NA	upstream_gene_variant	3	96813095	G	T	0.000418058	1	172225	ADD	1.42346	0.463154	9.44579	2.67441	NA	UC
3:96813436:C:T	3	96813436	C	T	EPHA6	upstream_gene_variant	upstream_gene_variant	modifier	intergenic_variant	NA	NA	NA	NA	NA	NA	NA	NA	NA	upstream_gene_variant	3	96813436	C	T	8.70954e-06	1	172225	ADD	3.65131	1.38626	6.93757	2.07364	NA	UC
3:96813436:C:T	3	96813436	C	T	EPHA6	upstream_gene_variant	upstream_gene_variant	modifier	intergenic_variant	NA	NA	NA	NA	NA	NA	NA	NA	NA	upstream_gene_variant	3	96813436	C	T	8.70954e-06	1	172225	ADD	4.10122	1.4345	8.17381	2.37162	NA	CD
3:96813761:G:A	3	96813761	G	A	EPHA6	upstream_gene_variant	upstream_gene_variant	modifier	intergenic_variant	NA	NA	NA	NA	NA	NA	NA	NA	NA	upstream_gene_variant	3	96813761	G	A	1.16127e-05	1	172225	ADD	3.65589	1.40469	6.7737	2.03381	NA	CD
3:96813824:G:A	3	96813824	G	A	EPHA6	upstream_gene_variant	upstream_gene_variant	modifier	intergenic_variant	NA	NA	NA	NA	NA	NA	NA	NA	NA	upstream_gene_variant	3	96813824	G	A	8.70954e-06	1	172225	ADD	4.20015	1.45235	8.36344	2.41698	NA	UC
3:96813936:C:T	3	96813936	C	T	EPHA6	upstream_gene_variant	upstream_gene_variant	modifier	intergenic_variant	NA	NA	NA	NA	NA	NA	NA	NA	NA	upstream_gene_variant	3	96813936	C	T	0.000101611	1	172225	ADD	2.45995	0.917848	7.18308	2.13315	NA	CD
3:96813969:G:A	3	96813969	G	A	EPHA6	upstream_gene_variant	upstream_gene_variant	modifier	intergenic_variant	NA	NA	NA	NA	NA	NA	NA	NA	NA	upstream_gene_variant	3	96813969	G	A	2.03223e-05	1	172225	ADD	3.12795	1.03976	9.05016	2.58059	NA	UC
3:96814236:A:C	3	96814236	A	C	EPHA6	upstream_gene_variant	upstream_gene_variant	modifier	intergenic_variant	NA	NA	NA	NA	NA	NA	NA	NA	NA	upstream_gene_variant	3	96814236	A	C	0.000418058	1	172225	ADD	1.42346	0.463154	9.44579	2.67441	NA	UC
3:96814521:C:G	3	96814521	C	G	EPHA6	upstream_gene_variant	upstream_gene_variant	modifier	intergenic_variant	NA	NA	NA	NA	NA	NA	NA	NA	NA	upstream_gene_variant	3	96814521	C	G	4.64509e-05	1	172225	ADD	2.79624	0.819038	11.6558	3.1938	NA	UC
3:96814536:C:T	3	96814536	C	T	EPHA6	upstream_gene_variant	upstream_gene_variant	modifier	intergenic_variant	NA	NA	NA	NA	NA	NA	NA	NA	NA	upstream_gene_variant	3	96814536	C	T	1.45159e-05	1	172225	ADD	4.49828	1.42489	9.96619	2.7974	NA	CD
3:96814536:C:T	3	96814536	C	T	EPHA6	upstream_gene_variant	upstream_gene_variant	modifier	intergenic_variant	NA	NA	NA	NA	NA	NA	NA	NA	NA	upstream_gene_variant	3	96814536	C	T	1.45159e-05	1	172225	ADD	3.47237	1.31043	7.02145	2.09399	NA	UC
3:96815094:CTT:C	3	96815094	CTT	C	EPHA6	intron_variant	intron_variant	modifier	intron_variant	NA	NA	NA	NA	NA	NA	NA	NA	NA	intron_variant	3	96815094	CTT	C	8.70954e-06	1	172225	ADD	4.75823	1.54308	9.50854	2.68927	NA	CD
3:96815112:G:T	3	96815112	G	T	EPHA6	intron_variant	intron_variant	modifier	intron_variant	NA	NA	NA	NA	NA	NA	NA	NA	NA	intron_variant	3	96815112	G	T	0.000418058	1	172225	ADD	1.42346	0.463154	9.44579	2.67441	NA	UC
3:96815581:G:C	3	96815581	G	C	EPHA6	intron_variant	intron_variant	modifier	intron_variant	NA	NA	NA	NA	NA	NA	NA	NA	NA	intron_variant	3	96815581	G	C	2.03223e-05	1	172225	ADD	3.8243	1.40894	7.36752	2.17775	NA	CD
3:96817439:A:T	3	96817439	A	T	EPHA6	intron_variant	intron_variant	modifier	intron_variant	NA	NA	NA	NA	NA	NA	NA	NA	NA	intron_variant	3	96817439	A	T	1.16127e-05	1	172225	ADD	4.26724	1.43666	8.82237	2.52642	NA	CD
3:96818015:TTAAG:T	3	96818015	TTAAG	T	EPHA6	intron_variant	intron_variant	modifier	intron_variant	NA	NA	NA	NA	NA	NA	NA	NA	NA	intron_variant	3	96818015	TTAAG	T	1.74191e-05	1	172225	ADD	3.62645	1.34518	7.26784	2.15366	NA	UC
3:96818220:T:G	3	96818220	T	G	EPHA6	intron_variant	intron_variant	modifier	intron_variant	NA	NA	NA	NA	NA	NA	NA	NA	NA	intron_variant	3	96818220	T	G	3.1935e-05	1	172225	ADD	3.3805	1.2918	6.84809	2.0519	NA	CD
3:96818318:A:G	3	96818318	A	G	EPHA6	intron_variant	intron_variant	modifier	intron_variant	NA	NA	NA	NA	NA	NA	NA	NA	NA	intron_variant	3	96818318	A	G	1.16127e-05	1	172225	ADD	3.68217	1.34481	7.49703	2.20901	NA	UC
3:96819634:T:G	3	96819634	T	G	EPHA6	intron_variant	intron_variant	modifier	intron_variant	NA	NA	NA	NA	NA	NA	NA	NA	NA	intron_variant	3	96819634	T	G	5.22572e-05	1	172225	ADD	2.70249	0.930592	8.43354	2.43372	NA	UC
3:96822332:G:T	3	96822332	G	T	EPHA6	intron_variant	intron_variant	modifier	intron_variant	NA	NA	NA	NA	NA	NA	NA	NA	NA	intron_variant	3	96822332	G	T	1.16127e-05	1	172225	ADD	3.74566	1.38096	7.35691	2.17519	NA	UC
3:96822412:A:T	3	96822412	A	T	EPHA6	intron_variant	intron_variant	modifier	intron_variant	NA	NA	NA	NA	NA	NA	NA	NA	NA	intron_variant	3	96822412	A	T	1.45159e-05	1	172225	ADD	3.63469	1.32669	7.5058	2.21112	NA	UC
3:96823183:A:G	3	96823183	A	G	EPHA6	intron_variant	intron_variant	modifier	intron_variant	NA	NA	NA	NA	NA	NA	NA	NA	NA	intron_variant	3	96823183	A	G	8.70954e-06	1	172225	ADD	4.33985	1.42295	9.30183	2.64031	NA	UC
3:96823626:T:C	3	96823626	T	C	EPHA6	intron_variant	intron_variant	modifier	intron_variant	NA	NA	NA	NA	NA	NA	NA	NA	NA	intron_variant	3	96823626	T	C	3.48381e-05	1	172225	ADD	2.66609	0.991093	7.23639	2.14606	NA	UC
3:96824270:A:G	3	96824270	A	G	EPHA6	intron_variant	intron_variant	modifier	intron_variant	NA	NA	NA	NA	NA	NA	NA	NA	NA	intron_variant	3	96824270	A	G	4.35477e-05	1	172225	ADD	2.74603	0.988219	7.72154	2.26308	NA	UC
3:96824399:G:T	3	96824399	G	T	EPHA6	intron_variant	intron_variant	modifier	intron_variant	NA	NA	NA	NA	NA	NA	NA	NA	NA	intron_variant	3	96824399	G	T	0.000418058	1	172225	ADD	1.42346	0.463154	9.44579	2.67441	NA	UC
3:96824830:A:G	3	96824830	A	G	EPHA6	intron_variant	intron_variant	modifier	intron_variant	NA	NA	NA	NA	NA	NA	NA	NA	NA	intron_variant	3	96824830	A	G	8.70954e-06	1	172225	ADD	3.93373	1.38179	8.10447	2.35501	NA	UC
3:96825265:C:CT	3	96825265	C	CT	EPHA6	intron_variant	intron_variant	modifier	intron_variant	NA	NA	NA	NA	NA	NA	NA	NA	NA	intron_variant	3	96825265	C	CT	0.000133546	1	172225	ADD	2.07832	0.732765	8.04445	2.34062	NA	UC
3:96825265:C:CT	3	96825265	C	CT	EPHA6	intron_variant	intron_variant	modifier	intron_variant	NA	NA	NA	NA	NA	NA	NA	NA	NA	intron_variant	3	96825265	C	CT	0.000133546	1	172225	ADD	2.47418	0.902268	7.51955	2.21443	NA	CD
3:96825997:A:C	3	96825997	A	C	EPHA6	intron_variant	intron_variant	modifier	intron_variant	NA	NA	NA	NA	NA	NA	NA	NA	NA	intron_variant	3	96825997	A	C	8.70954e-06	1	172225	ADD	3.73737	1.38364	7.29603	2.16048	NA	UC
3:96826533:C:T	3	96826533	C	T	EPHA6	intron_variant	intron_variant	modifier	intron_variant	NA	NA	NA	NA	NA	NA	NA	NA	NA	intron_variant	3	96826533	C	T	1.45159e-05	1	172225	ADD	4.03662	1.4554	7.69257	2.25611	NA	CD
3:96826706:A:G	3	96826706	A	G	EPHA6	intron_variant	intron_variant	modifier	intron_variant	NA	NA	NA	NA	NA	NA	NA	NA	NA	intron_variant	3	96826706	A	G	1.45159e-05	1	172225	ADD	4.59432	1.48995	9.50827	2.68921	NA	CD
3:96827428:G:A	3	96827428	G	A	EPHA6	intron_variant	intron_variant	modifier	intron_variant	NA	NA	NA	NA	NA	NA	NA	NA	NA	intron_variant	3	96827428	G	A	9.58049e-05	1	172225	ADD	2.44882	0.76719	10.1885	2.84979	NA	UC
3:96828291:C:G	3	96828291	C	G	EPHA6	intron_variant	intron_variant	modifier	intron_variant	NA	NA	NA	NA	NA	NA	NA	NA	NA	intron_variant	3	96828291	C	G	2.03223e-05	1	172225	ADD	2.46842	0.956319	6.66241	2.00671	NA	CD
3:96828452:G:A	3	96828452	G	A	EPHA6	intron_variant	intron_variant	modifier	intron_variant	NA	NA	NA	NA	NA	NA	NA	NA	NA	intron_variant	3	96828452	G	A	0.000121934	1	172225	ADD	2.34346	0.890267	6.92904	2.07157	NA	CD
3:96828523:A:C	3	96828523	A	C	EPHA6	intron_variant	intron_variant	modifier	intron_variant	NA	NA	NA	NA	NA	NA	NA	NA	NA	intron_variant	3	96828523	A	C	1.16127e-05	1	172225	ADD	4.36037	1.46724	8.83172	2.52865	NA	CD
3:96829507:G:T	3	96829507	G	T	EPHA6	intron_variant	intron_variant	modifier	intron_variant	NA	NA	NA	NA	NA	NA	NA	NA	NA	intron_variant	3	96829507	G	T	2.32254e-05	1	172225	ADD	3.51773	1.30403	7.27697	2.15587	NA	UC
3:96832528:A:C	3	96832528	A	C	EPHA6	intron_variant	intron_variant	modifier	intron_variant	NA	NA	NA	NA	NA	NA	NA	NA	NA	intron_variant	3	96832528	A	C	1.45159e-05	1	172225	ADD	3.87818	1.48564	6.81442	2.04371	NA	CD
3:96832561:T:C	3	96832561	T	C	EPHA6	intron_variant	intron_variant	modifier	intron_variant	NA	NA	NA	NA	NA	NA	NA	NA	NA	intron_variant	3	96832561	T	C	1.16127e-05	1	172225	ADD	3.62062	1.38371	6.84658	2.05153	NA	UC
3:96832634:G:A	3	96832634	G	A	EPHA6	intron_variant	intron_variant	modifier	intron_variant	NA	NA	NA	NA	NA	NA	NA	NA	NA	intron_variant	3	96832634	G	A	1.16127e-05	1	172225	ADD	3.81832	1.37595	7.70088	2.25811	NA	UC
3:96834101:C:A	3	96834101	C	A	EPHA6	intron_variant	intron_variant	modifier	intron_variant	NA	NA	NA	NA	NA	NA	NA	NA	NA	intron_variant	3	96834101	C	A	1.74191e-05	1	172225	ADD	3.49829	1.31729	7.05258	2.10154	NA	UC
3:96834282:A:G	3	96834282	A	G	EPHA6	intron_variant	intron_variant	modifier	intron_variant	NA	NA	NA	NA	NA	NA	NA	NA	NA	intron_variant	3	96834282	A	G	8.70954e-06	1	172225	ADD	5.25847	1.53861	11.6805	3.19957	NA	CD
3:96834284:A:C	3	96834284	A	C	EPHA6	intron_variant	intron_variant	modifier	intron_variant	NA	NA	NA	NA	NA	NA	NA	NA	NA	intron_variant	3	96834284	A	C	8.70954e-06	1	172225	ADD	4.38163	1.43616	9.30821	2.64182	NA	UC
3:96834564:T:G	3	96834564	T	G	EPHA6	intron_variant	intron_variant	modifier	intron_variant	NA	NA	NA	NA	NA	NA	NA	NA	NA	intron_variant	3	96834564	T	G	0.000168384	1	172225	ADD	2.31518	0.765316	9.15143	2.60463	NA	CD
3:96836660:G:A	3	96836660	G	A	EPHA6	intron_variant	intron_variant	modifier	intron_variant	NA	NA	NA	NA	NA	NA	NA	NA	NA	intron_variant	3	96836660	G	A	1.45159e-05	1	172225	ADD	4.47848	1.43948	9.67944	2.72969	NA	CD
3:96836801:CTGCCAACACACATAGTCTTGTCT:C	3	96836801	CTGCCAACACACATAGTCTTGTCT	C	EPHA6	intron_variant	intron_variant	modifier	intron_variant	NA	NA	NA	NA	NA	NA	NA	NA	NA	intron_variant	3	96836801	CTGCCAACACACATAGTCTTGTCT	C	0.000418058	1	172225	ADD	1.42346	0.463154	9.44579	2.67441	NA	UC
3:96839132:T:C	3	96839132	T	C	EPHA6	intron_variant	intron_variant	modifier	intron_variant	NA	NA	NA	NA	NA	NA	NA	NA	NA	intron_variant	3	96839132	T	C	1.16127e-05	1	172225	ADD	4.13108	1.39735	8.74005	2.50683	NA	UC
3:96839742:T:C	3	96839742	T	C	EPHA6	intron_variant	intron_variant	modifier	intron_variant	NA	NA	NA	NA	NA	NA	NA	NA	NA	intron_variant	3	96839742	T	C	8.70954e-06	1	172225	ADD	4.1492	1.40735	8.69212	2.49541	NA	UC
3:96840771:T:C	3	96840771	T	C	EPHA6	intron_variant	intron_variant	modifier	intron_variant	NA	NA	NA	NA	NA	NA	NA	NA	NA	intron_variant	3	96840771	T	C	8.70954e-06	1	172225	ADD	3.85769	1.39461	7.6515	2.24622	NA	UC
3:96842007:C:T	3	96842007	C	T	EPHA6	intron_variant	intron_variant	modifier	intron_variant	NA	NA	NA	NA	NA	NA	NA	NA	NA	intron_variant	3	96842007	C	T	2.03223e-05	1	172225	ADD	4.16607	1.09717	14.418	3.83448	NA	UC
3:96844333:T:C	3	96844333	T	C	EPHA6	intron_variant	intron_variant	modifier	intron_variant	NA	NA	NA	NA	NA	NA	NA	NA	NA	intron_variant	3	96844333	T	C	1.45159e-05	1	172225	ADD	4.50859	1.42489	10.012	2.80821	NA	CD
3:96844345:C:T	3	96844345	C	T	EPHA6	intron_variant	intron_variant	modifier	intron_variant	NA	NA	NA	NA	NA	NA	NA	NA	NA	intron_variant	3	96844345	C	T	1.45159e-05	1	172225	ADD	4.23054	1.39602	9.18357	2.61226	NA	CD
3:96844560:A:G	3	96844560	A	G	EPHA6	intron_variant	intron_variant	modifier	intron_variant	NA	NA	NA	NA	NA	NA	NA	NA	NA	intron_variant	3	96844560	A	G	3.1935e-05	1	172225	ADD	3.01659	1.00338	9.03854	2.57783	NA	UC
3:96845053:C:T	3	96845053	C	T	EPHA6	intron_variant	intron_variant	modifier	intron_variant	NA	NA	NA	NA	NA	NA	NA	NA	NA	intron_variant	3	96845053	C	T	2.32254e-05	1	172225	ADD	3.38527	1.30084	6.77231	2.03347	NA	CD
3:96845181:A:G	3	96845181	A	G	EPHA6	intron_variant	intron_variant	modifier	intron_variant	NA	NA	NA	NA	NA	NA	NA	NA	NA	intron_variant	3	96845181	A	G	0.00341994	1	172225	ADD	0.603749	0.221741	7.41346	2.18884	NA	UC
3:96845389:C:T	3	96845389	C	T	EPHA6	intron_variant	intron_variant	modifier	intron_variant	NA	NA	NA	NA	NA	NA	NA	NA	NA	intron_variant	3	96845389	C	T	4.9354e-05	1	172225	ADD	2.49242	0.918564	7.36244	2.17652	NA	UC
3:96845399:C:G	3	96845399	C	G	EPHA6	intron_variant	intron_variant	modifier	intron_variant	NA	NA	NA	NA	NA	NA	NA	NA	NA	intron_variant	3	96845399	C	G	4.9354e-05	1	172225	ADD	2.49242	0.918564	7.36244	2.17652	NA	UC
3:96845551:CTTGT:C	3	96845551	CTTGT	C	EPHA6	intron_variant	intron_variant	modifier	intron_variant	NA	NA	NA	NA	NA	NA	NA	NA	NA	intron_variant	3	96845551	CTTGT	C	2.03223e-05	1	172225	ADD	3.6236	1.33691	7.3464	2.17265	NA	CD
3:96845720:C:A	3	96845720	C	A	EPHA6	intron_variant	intron_variant	modifier	intron_variant	NA	NA	NA	NA	NA	NA	NA	NA	NA	intron_variant	3	96845720	C	A	8.70954e-06	1	172225	ADD	4.02807	1.40819	8.18219	2.37362	NA	UC
3:96847140:A:G	3	96847140	A	G	EPHA6	intron_variant	intron_variant	modifier	intron_variant	NA	NA	NA	NA	NA	NA	NA	NA	NA	intron_variant	3	96847140	A	G	1.16127e-05	1	172225	ADD	3.8093	1.36518	7.78591	2.27856	NA	CD
3:96847140:A:G	3	96847140	A	G	EPHA6	intron_variant	intron_variant	modifier	intron_variant	NA	NA	NA	NA	NA	NA	NA	NA	NA	intron_variant	3	96847140	A	G	1.16127e-05	1	172225	ADD	3.92626	1.37516	8.15178	2.36634	NA	UC
3:96847142:T:C	3	96847142	T	C	EPHA6	intron_variant	intron_variant	modifier	intron_variant	NA	NA	NA	NA	NA	NA	NA	NA	NA	intron_variant	3	96847142	T	C	1.16127e-05	1	172225	ADD	3.8093	1.36518	7.78591	2.27856	NA	CD
3:96847142:T:C	3	96847142	T	C	EPHA6	intron_variant	intron_variant	modifier	intron_variant	NA	NA	NA	NA	NA	NA	NA	NA	NA	intron_variant	3	96847142	T	C	1.16127e-05	1	172225	ADD	3.92626	1.37516	8.15178	2.36634	NA	UC
3:96848302:A:G	3	96848302	A	G	EPHA6	intron_variant	intron_variant	modifier	intron_variant	NA	NA	NA	NA	NA	NA	NA	NA	NA	intron_variant	3	96848302	A	G	0.000101611	1	172225	ADD	2.75307	0.792834	12.0578	3.28756	NA	CD
3:96848658:T:C	3	96848658	T	C	EPHA6	intron_variant	intron_variant	modifier	intron_variant	NA	NA	NA	NA	NA	NA	NA	NA	NA	intron_variant	3	96848658	T	C	2.90318e-05	1	172225	ADD	3.63142	1.31515	7.62438	2.23969	NA	CD
3:96848882:A:G	3	96848882	A	G	EPHA6	intron_variant	intron_variant	modifier	intron_variant	NA	NA	NA	NA	NA	NA	NA	NA	NA	intron_variant	3	96848882	A	G	8.70954e-06	1	172225	ADD	5.03029	1.55963	10.4026	2.90019	NA	CD
3:96849966:A:G	3	96849966	A	G	EPHA6	intron_variant	intron_variant	modifier	intron_variant	NA	NA	NA	NA	NA	NA	NA	NA	NA	intron_variant	3	96849966	A	G	6.67731e-05	1	172225	ADD	2.24427	0.842481	7.09626	2.11213	NA	CD
3:96850114:C:T	3	96850114	C	T	EPHA6	intron_variant	intron_variant	modifier	intron_variant	NA	NA	NA	NA	NA	NA	NA	NA	NA	intron_variant	3	96850114	C	T	1.16127e-05	1	172225	ADD	4.59926	1.45034	10.0563	2.81864	NA	UC
3:96850114:C:T	3	96850114	C	T	EPHA6	intron_variant	intron_variant	modifier	intron_variant	NA	NA	NA	NA	NA	NA	NA	NA	NA	intron_variant	3	96850114	C	T	1.16127e-05	1	172225	ADD	4.52191	1.44019	9.8584	2.77196	NA	CD
3:96850351:G:A	3	96850351	G	A	EPHA6	intron_variant	intron_variant	modifier	intron_variant	NA	NA	NA	NA	NA	NA	NA	NA	NA	intron_variant	3	96850351	G	A	0.000423864	1	172225	ADD	1.41873	0.462801	9.39742	2.66296	NA	UC
3:96851877:A:G	3	96851877	A	G	EPHA6	intron_variant	intron_variant	modifier	intron_variant	NA	NA	NA	NA	NA	NA	NA	NA	NA	intron_variant	3	96851877	A	G	2.32254e-05	1	172225	ADD	3.33848	1.29033	6.69411	2.01443	NA	CD
3:96852702:T:A	3	96852702	T	A	EPHA6	intron_variant	intron_variant	modifier	intron_variant	NA	NA	NA	NA	NA	NA	NA	NA	NA	intron_variant	3	96852702	T	A	0.000418058	1	172225	ADD	1.42346	0.463154	9.44579	2.67441	NA	UC
3:96854069:A:C	3	96854069	A	C	EPHA6	intron_variant	intron_variant	modifier	intron_variant	NA	NA	NA	NA	NA	NA	NA	NA	NA	intron_variant	3	96854069	A	C	0.000113224	1	172225	ADD	2.19371	0.746623	8.63292	2.4813	NA	UC
3:96855901:A:G	3	96855901	A	G	EPHA6	intron_variant	intron_variant	modifier	intron_variant	NA	NA	NA	NA	NA	NA	NA	NA	NA	intron_variant	3	96855901	A	G	4.35477e-05	1	172225	ADD	2.73608	0.962318	8.0839	2.35008	NA	UC
3:96856852:A:G	3	96856852	A	G	EPHA6	intron_variant	intron_variant	modifier	intron_variant	NA	NA	NA	NA	NA	NA	NA	NA	NA	intron_variant	3	96856852	A	G	1.45159e-05	1	172225	ADD	4.17358	1.40233	8.8576	2.53481	NA	CD
3:96856928:A:T	3	96856928	A	T	EPHA6	intron_variant	intron_variant	modifier	intron_variant	NA	NA	NA	NA	NA	NA	NA	NA	NA	intron_variant	3	96856928	A	T	8.70954e-06	1	172225	ADD	5.57058	1.55717	12.7975	3.45957	NA	CD
3:96857462:G:C	3	96857462	G	C	EPHA6	intron_variant	intron_variant	modifier	intron_variant	NA	NA	NA	NA	NA	NA	NA	NA	NA	intron_variant	3	96857462	G	C	1.16127e-05	1	172225	ADD	3.54482	1.34692	6.92631	2.0709	NA	CD
3:96857551:C:T	3	96857551	C	T	EPHA6	intron_variant	intron_variant	modifier	intron_variant	NA	NA	NA	NA	NA	NA	NA	NA	NA	intron_variant	3	96857551	C	T	0.000418058	1	172225	ADD	1.42346	0.463154	9.44579	2.67441	NA	UC
3:96858003:G:A	3	96858003	G	A	EPHA6	intron_variant	intron_variant	modifier	intron_variant	NA	NA	NA	NA	NA	NA	NA	NA	NA	intron_variant	3	96858003	G	A	0.000432574	1	172225	ADD	1.37601	0.460089	8.94459	2.5555	NA	UC
3:96858301:G:A	3	96858301	G	A	EPHA6	intron_variant	intron_variant	modifier	intron_variant	NA	NA	NA	NA	NA	NA	NA	NA	NA	intron_variant	3	96858301	G	A	0.000418058	1	172225	ADD	1.42346	0.463154	9.44579	2.67441	NA	UC
3:96859111:C:CT	3	96859111	C	CT	EPHA6	intron_variant	intron_variant	modifier	intron_variant	NA	NA	NA	NA	NA	NA	NA	NA	NA	intron_variant	3	96859111	C	CT	5.51604e-05	1	172225	ADD	2.38999	0.907175	6.94081	2.07442	NA	UC
3:96859382:A:C	3	96859382	A	C	EPHA6	intron_variant	intron_variant	modifier	intron_variant	NA	NA	NA	NA	NA	NA	NA	NA	NA	intron_variant	3	96859382	A	C	1.16127e-05	1	172225	ADD	4.91602	1.47441	11.1171	3.06785	NA	CD
3:96859650:T:A	3	96859650	T	A	EPHA6	intron_variant	intron_variant	modifier	intron_variant	NA	NA	NA	NA	NA	NA	NA	NA	NA	intron_variant	3	96859650	T	A	8.70954e-06	1	172225	ADD	4.62563	1.52699	9.17638	2.61055	NA	CD
3:96859651:ATCTC:A	3	96859651	ATCTC	A	EPHA6	intron_variant	intron_variant	modifier	intron_variant	NA	NA	NA	NA	NA	NA	NA	NA	NA	intron_variant	3	96859651	ATCTC	A	8.70954e-06	1	172225	ADD	4.62563	1.52699	9.17638	2.61055	NA	CD
3:96860358:A:AT	3	96860358	A	AT	EPHA6	intron_variant	intron_variant	modifier	intron_variant	NA	NA	NA	NA	NA	NA	NA	NA	NA	intron_variant	3	96860358	A	AT	1.16127e-05	1	172225	ADD	4.26496	1.40348	9.23458	2.62436	NA	UC
3:96860358:A:AT	3	96860358	A	AT	EPHA6	intron_variant	intron_variant	modifier	intron_variant	NA	NA	NA	NA	NA	NA	NA	NA	NA	intron_variant	3	96860358	A	AT	1.16127e-05	1	172225	ADD	4.88909	1.47822	10.939	3.02613	NA	CD
3:96861055:C:T	3	96861055	C	T	EPHA6	intron_variant	intron_variant	modifier	intron_variant	NA	NA	NA	NA	NA	NA	NA	NA	NA	intron_variant	3	96861055	C	T	8.70954e-06	1	172225	ADD	4.48152	1.45771	9.45168	2.67581	NA	UC
3:96861058:G:A	3	96861058	G	A	EPHA6	intron_variant	intron_variant	modifier	intron_variant	NA	NA	NA	NA	NA	NA	NA	NA	NA	intron_variant	3	96861058	G	A	8.70954e-06	1	172225	ADD	3.76224	1.43246	6.89809	2.06405	NA	UC
3:96861194:G:A	3	96861194	G	A	EPHA6	intron_variant	intron_variant	modifier	intron_variant	NA	NA	NA	NA	NA	NA	NA	NA	NA	intron_variant	3	96861194	G	A	2.32254e-05	1	172225	ADD	4.03862	1.31779	9.39241	2.66177	NA	CD
3:96861385:CT:C	3	96861385	CT	C	EPHA6	intron_variant	intron_variant	modifier	intron_variant	NA	NA	NA	NA	NA	NA	NA	NA	NA	intron_variant	3	96861385	CT	C	0.000423864	1	172225	ADD	1.55245	0.442865	12.2883	3.34122	NA	UC
3:96861762:G:A	3	96861762	G	A	EPHA6	intron_variant	intron_variant	modifier	intron_variant	NA	NA	NA	NA	NA	NA	NA	NA	NA	intron_variant	3	96861762	G	A	8.70954e-06	1	172225	ADD	4.31104	1.43417	9.03573	2.57716	NA	CD
3:96862414:T:C	3	96862414	T	C	EPHA6	intron_variant	intron_variant	modifier	intron_variant	NA	NA	NA	NA	NA	NA	NA	NA	NA	intron_variant	3	96862414	T	C	8.70954e-06	1	172225	ADD	4.06286	1.42302	8.15162	2.3663	NA	CD
3:96863639:C:A	3	96863639	C	A	EPHA6	intron_variant	intron_variant	modifier	intron_variant	NA	NA	NA	NA	NA	NA	NA	NA	NA	intron_variant	3	96863639	C	A	8.70954e-06	1	172225	ADD	3.51217	1.3623	6.64665	2.00287	NA	UC
3:96863832:A:G	3	96863832	A	G	EPHA6	intron_variant	intron_variant	modifier	intron_variant	NA	NA	NA	NA	NA	NA	NA	NA	NA	intron_variant	3	96863832	A	G	4.06445e-05	1	172225	ADD	3.35806	1.27518	6.93482	2.07297	NA	CD
3:96863976:A:G	3	96863976	A	G	EPHA6	intron_variant	intron_variant	modifier	intron_variant	NA	NA	NA	NA	NA	NA	NA	NA	NA	intron_variant	3	96863976	A	G	1.74191e-05	1	172225	ADD	4.12858	1.38427	8.89524	2.54376	NA	CD
3:96866001:A:G	3	96866001	A	G	EPHA6	intron_variant	intron_variant	modifier	intron_variant	NA	NA	NA	NA	NA	NA	NA	NA	NA	intron_variant	3	96866001	A	G	2.90318e-05	1	172225	ADD	3.66638	1.0312	12.6412	3.42327	NA	UC
3:96866288:G:A	3	96866288	G	A	EPHA6	intron_variant	intron_variant	modifier	intron_variant	NA	NA	NA	NA	NA	NA	NA	NA	NA	intron_variant	3	96866288	G	A	1.16127e-05	1	172225	ADD	3.61315	1.36235	7.03387	2.09701	NA	CD
3:96866288:G:A	3	96866288	G	A	EPHA6	intron_variant	intron_variant	modifier	intron_variant	NA	NA	NA	NA	NA	NA	NA	NA	NA	intron_variant	3	96866288	G	A	1.16127e-05	1	172225	ADD	3.47995	1.3253	6.89471	2.06323	NA	UC
3:96866741:A:C	3	96866741	A	C	EPHA6	intron_variant	intron_variant	modifier	intron_variant	NA	NA	NA	NA	NA	NA	NA	NA	NA	intron_variant	3	96866741	A	C	1.45159e-05	1	172225	ADD	3.94621	1.10248	12.8121	3.46296	NA	UC
3:96867224:GTATT:G	3	96867224	GTATT	G	EPHA6	intron_variant	intron_variant	modifier	intron_variant	NA	NA	NA	NA	NA	NA	NA	NA	NA	intron_variant	3	96867224	GTATT	G	1.16127e-05	1	172225	ADD	4.34125	1.54389	7.90676	2.30759	NA	CD
3:96867430:G:T	3	96867430	G	T	EPHA6	intron_variant	intron_variant	modifier	intron_variant	NA	NA	NA	NA	NA	NA	NA	NA	NA	intron_variant	3	96867430	G	T	1.45159e-05	1	172225	ADD	3.72941	1.34023	7.74322	2.26829	NA	UC
3:96867680:A:G	3	96867680	A	G	EPHA6	intron_variant	intron_variant	modifier	intron_variant	NA	NA	NA	NA	NA	NA	NA	NA	NA	intron_variant	3	96867680	A	G	8.70954e-06	1	172225	ADD	4.37957	1.4647	8.94062	2.55456	NA	CD
3:96868867:C:G	3	96868867	C	G	EPHA6	intron_variant	intron_variant	modifier	intron_variant	NA	NA	NA	NA	NA	NA	NA	NA	NA	intron_variant	3	96868867	C	G	8.70954e-06	1	172225	ADD	3.80615	1.38543	7.54752	2.22118	NA	UC
3:96869024:G:A	3	96869024	G	A	EPHA6	intron_variant	intron_variant	modifier	intron_variant	NA	NA	NA	NA	NA	NA	NA	NA	NA	intron_variant	3	96869024	G	A	1.74191e-05	1	172225	ADD	3.61061	1.33592	7.30464	2.16256	NA	CD
3:96869223:G:T	3	96869223	G	T	EPHA6	intron_variant	intron_variant	modifier	intron_variant	NA	NA	NA	NA	NA	NA	NA	NA	NA	intron_variant	3	96869223	G	T	1.16127e-05	1	172225	ADD	3.51842	1.34096	6.88439	2.06072	NA	UC
3:96869436:G:A	3	96869436	G	A	EPHA6	intron_variant	intron_variant	modifier	intron_variant	NA	NA	NA	NA	NA	NA	NA	NA	NA	intron_variant	3	96869436	G	A	1.74191e-05	1	172225	ADD	3.44367	1.30812	6.93022	2.07185	NA	UC
3:96869672:T:C	3	96869672	T	C	EPHA6	intron_variant	intron_variant	modifier	intron_variant	NA	NA	NA	NA	NA	NA	NA	NA	NA	intron_variant	3	96869672	T	C	1.45159e-05	1	172225	ADD	3.55028	1.33898	7.03038	2.09616	NA	UC
3:96870685:A:G	3	96870685	A	G	EPHA6	intron_variant	intron_variant	modifier	intron_variant	NA	NA	NA	NA	NA	NA	NA	NA	NA	intron_variant	3	96870685	A	G	8.70954e-06	1	172225	ADD	5.13305	1.54555	11.0302	3.04751	NA	CD
3:96870887:T:G	3	96870887	T	G	EPHA6	intron_variant	intron_variant	modifier	intron_variant	NA	NA	NA	NA	NA	NA	NA	NA	NA	intron_variant	3	96870887	T	G	2.90318e-05	1	172225	ADD	3.55798	1.02507	12.0476	3.28518	NA	UC
3:96871762:G:A	3	96871762	G	A	EPHA6	intron_variant	intron_variant	modifier	intron_variant	NA	NA	NA	NA	NA	NA	NA	NA	NA	intron_variant	3	96871762	G	A	8.70954e-06	1	172225	ADD	4.66915	1.75716	7.06084	2.10354	NA	CD
3:96871790:A:G	3	96871790	A	G	EPHA6	intron_variant	intron_variant	modifier	intron_variant	NA	NA	NA	NA	NA	NA	NA	NA	NA	intron_variant	3	96871790	A	G	8.70954e-06	1	172225	ADD	4.66915	1.75716	7.06084	2.10354	NA	CD
3:96873761:C:A	3	96873761	C	A	EPHA6	intron_variant	intron_variant	modifier	intron_variant	NA	NA	NA	NA	NA	NA	NA	NA	NA	intron_variant	3	96873761	C	A	1.16127e-05	1	172225	ADD	3.55055	1.33606	7.06215	2.10386	NA	CD
3:96873811:AC:A	3	96873811	AC	A	EPHA6	intron_variant	intron_variant	modifier	intron_variant	NA	NA	NA	NA	NA	NA	NA	NA	NA	intron_variant	3	96873811	AC	A	8.70954e-06	1	172225	ADD	3.74312	1.36618	7.50672	2.21134	NA	UC
3:96874081:C:T	3	96874081	C	T	EPHA6	intron_variant	intron_variant	modifier	intron_variant	NA	NA	NA	NA	NA	NA	NA	NA	NA	intron_variant	3	96874081	C	T	8.70954e-06	1	172225	ADD	3.57591	1.35544	6.96001	2.07909	NA	UC
3:96874387:G:T	3	96874387	G	T	EPHA6	intron_variant	intron_variant	modifier	intron_variant	NA	NA	NA	NA	NA	NA	NA	NA	NA	intron_variant	3	96874387	G	T	8.70954e-06	1	172225	ADD	4.06286	1.42302	8.15162	2.3663	NA	CD
3:96874509:T:C	3	96874509	T	C	EPHA6	intron_variant	intron_variant	modifier	intron_variant	NA	NA	NA	NA	NA	NA	NA	NA	NA	intron_variant	3	96874509	T	C	1.16127e-05	1	172225	ADD	3.87672	1.36881	8.02124	2.33506	NA	UC
3:96875108:A:G	3	96875108	A	G	EPHA6	intron_variant	intron_variant	modifier	intron_variant	NA	NA	NA	NA	NA	NA	NA	NA	NA	intron_variant	3	96875108	A	G	1.45159e-05	1	172225	ADD	3.47173	1.32155	6.90122	2.06481	NA	CD
3:96875301:T:A	3	96875301	T	A	EPHA6	intron_variant	intron_variant	modifier	intron_variant	NA	NA	NA	NA	NA	NA	NA	NA	NA	intron_variant	3	96875301	T	A	0.000418058	1	172225	ADD	1.42346	0.463154	9.44579	2.67441	NA	UC
3:96875982:G:A	3	96875982	G	A	EPHA6	intron_variant	intron_variant	modifier	intron_variant	NA	NA	NA	NA	NA	NA	NA	NA	NA	intron_variant	3	96875982	G	A	1.45159e-05	1	172225	ADD	3.37444	1.30737	6.662	2.00661	NA	UC
3:96875983:C:A	3	96875983	C	A	EPHA6	intron_variant	intron_variant	modifier	intron_variant	NA	NA	NA	NA	NA	NA	NA	NA	NA	intron_variant	3	96875983	C	A	1.45159e-05	1	172225	ADD	3.37444	1.30737	6.662	2.00661	NA	UC
3:96877878:G:A	3	96877878	G	A	EPHA6	intron_variant	intron_variant	modifier	intron_variant	NA	NA	NA	NA	NA	NA	NA	NA	NA	intron_variant	3	96877878	G	A	1.74191e-05	1	172225	ADD	3.73388	1.36119	7.52456	2.21564	NA	CD
3:96878440:T:A	3	96878440	T	A	EPHA6	intron_variant	intron_variant	modifier	intron_variant	NA	NA	NA	NA	NA	NA	NA	NA	NA	intron_variant	3	96878440	T	A	2.32254e-05	1	172225	ADD	3.98688	1.35739	8.62699	2.47989	NA	CD
3:96878561:T:C	3	96878561	T	C	EPHA6	intron_variant	intron_variant	modifier	intron_variant	NA	NA	NA	NA	NA	NA	NA	NA	NA	intron_variant	3	96878561	T	C	1.45159e-05	1	172225	ADD	4.03662	1.4554	7.69257	2.25611	NA	CD
3:96878966:GATT:G	3	96878966	GATT	G	EPHA6	intron_variant	intron_variant	modifier	intron_variant	NA	NA	NA	NA	NA	NA	NA	NA	NA	intron_variant	3	96878966	GATT	G	3.1935e-05	1	172225	ADD	3.40416	1.296	6.89935	2.06436	NA	CD
3:96879037:G:A	3	96879037	G	A	EPHA6	intron_variant	intron_variant	modifier	intron_variant	NA	NA	NA	NA	NA	NA	NA	NA	NA	intron_variant	3	96879037	G	A	1.45159e-05	1	172225	ADD	3.74244	1.34632	7.72699	2.26439	NA	UC
3:96879056:T:C	3	96879056	T	C	EPHA6	intron_variant	intron_variant	modifier	intron_variant	NA	NA	NA	NA	NA	NA	NA	NA	NA	intron_variant	3	96879056	T	C	1.16127e-05	1	172225	ADD	4.33216	1.42522	9.23948	2.62552	NA	UC
3:96879075:A:G	3	96879075	A	G	EPHA6	intron_variant	intron_variant	modifier	intron_variant	NA	NA	NA	NA	NA	NA	NA	NA	NA	intron_variant	3	96879075	A	G	8.70954e-06	1	172225	ADD	4.1102	1.39826	8.6407	2.48315	NA	UC
3:96890523:A:G	3	96890523	A	G	EPHA6	intron_variant	intron_variant	modifier	intron_variant	NA	NA	NA	NA	NA	NA	NA	NA	NA	intron_variant	3	96890523	A	G	1.16127e-05	1	172225	ADD	4.17186	1.42398	8.58324	2.46945	NA	CD
3:96890523:A:G	3	96890523	A	G	EPHA6	intron_variant	intron_variant	modifier	intron_variant	NA	NA	NA	NA	NA	NA	NA	NA	NA	intron_variant	3	96890523	A	G	1.16127e-05	1	172225	ADD	4.52834	1.44503	9.82028	2.76296	NA	UC
3:96892875:A:G	3	96892875	A	G	EPHA6	intron_variant	intron_variant	modifier	intron_variant	NA	NA	NA	NA	NA	NA	NA	NA	NA	intron_variant	3	96892875	A	G	1.16127e-05	1	172225	ADD	3.80846	1.37572	7.66375	2.24917	NA	UC
3:96892915:G:A	3	96892915	G	A	EPHA6	intron_variant	intron_variant	modifier	intron_variant	NA	NA	NA	NA	NA	NA	NA	NA	NA	intron_variant	3	96892915	G	A	0.000418058	1	172225	ADD	1.42346	0.463154	9.44579	2.67441	NA	UC
3:96892952:A:ATG	3	96892952	A	ATG	EPHA6	intron_variant	intron_variant	modifier	intron_variant	NA	NA	NA	NA	NA	NA	NA	NA	NA	intron_variant	3	96892952	A	ATG	0.000386123	1	172225	ADD	1.36271	0.493672	7.61958	2.23854	NA	UC
3:96896862:T:C	3	96896862	T	C	EPHA6	intron_variant	intron_variant	modifier	intron_variant	NA	NA	NA	NA	NA	NA	NA	NA	NA	intron_variant	3	96896862	T	C	0.000418058	1	172225	ADD	1.42346	0.463154	9.44579	2.67441	NA	UC
3:96896958:A:G	3	96896958	A	G	EPHA6	intron_variant	intron_variant	modifier	intron_variant	NA	NA	NA	NA	NA	NA	NA	NA	NA	intron_variant	3	96896958	A	G	1.16127e-05	1	172225	ADD	4.38297	1.45058	9.12971	2.59948	NA	CD
3:96897071:C:T	3	96897071	C	T	EPHA6	intron_variant	intron_variant	modifier	intron_variant	NA	NA	NA	NA	NA	NA	NA	NA	NA	intron_variant	3	96897071	C	T	1.74191e-05	1	172225	ADD	3.87208	1.34696	8.26376	2.39314	NA	UC
3:96897271:A:G	3	96897271	A	G	EPHA6	intron_variant	intron_variant	modifier	intron_variant	NA	NA	NA	NA	NA	NA	NA	NA	NA	intron_variant	3	96897271	A	G	1.74191e-05	1	172225	ADD	3.75869	1.36376	7.5962	2.23291	NA	UC
3:96897445:A:G	3	96897445	A	G	EPHA6	intron_variant	intron_variant	modifier	intron_variant	NA	NA	NA	NA	NA	NA	NA	NA	NA	intron_variant	3	96897445	A	G	2.32254e-05	1	172225	ADD	3.54731	1.30726	7.36338	2.17675	NA	CD
3:96898077:A:G	3	96898077	A	G	EPHA6	intron_variant	intron_variant	modifier	intron_variant	NA	NA	NA	NA	NA	NA	NA	NA	NA	intron_variant	3	96898077	A	G	8.70954e-06	1	172225	ADD	4.47802	1.45599	9.45926	2.6776	NA	CD
3:96898077:A:G	3	96898077	A	G	EPHA6	intron_variant	intron_variant	modifier	intron_variant	NA	NA	NA	NA	NA	NA	NA	NA	NA	intron_variant	3	96898077	A	G	8.70954e-06	1	172225	ADD	3.55676	1.36537	6.78587	2.03677	NA	UC
3:96898365:G:A	3	96898365	G	A	EPHA6	intron_variant	intron_variant	modifier	intron_variant	NA	NA	NA	NA	NA	NA	NA	NA	NA	intron_variant	3	96898365	G	A	1.16127e-05	1	172225	ADD	4.62897	1.44465	10.267	2.86828	NA	CD
3:96898565:C:T	3	96898565	C	T	EPHA6	intron_variant	intron_variant	modifier	intron_variant	NA	NA	NA	NA	NA	NA	NA	NA	NA	intron_variant	3	96898565	C	T	2.61286e-05	1	172225	ADD	3.42854	1.01788	11.3455	3.12129	NA	UC
3:96898621:A:G	3	96898621	A	G	EPHA6	intron_variant	intron_variant	modifier	intron_variant	NA	NA	NA	NA	NA	NA	NA	NA	NA	intron_variant	3	96898621	A	G	2.32254e-05	1	172225	ADD	3.37619	1.29321	6.81577	2.04404	NA	CD
3:96899520:T:C	3	96899520	T	C	EPHA6	intron_variant	intron_variant	modifier	intron_variant	NA	NA	NA	NA	NA	NA	NA	NA	NA	intron_variant	3	96899520	T	C	2.32254e-05	1	172225	ADD	3.98029	1.35339	8.64935	2.48522	NA	CD
3:96899556:C:A	3	96899556	C	A	EPHA6	intron_variant	intron_variant	modifier	intron_variant	NA	NA	NA	NA	NA	NA	NA	NA	NA	intron_variant	3	96899556	C	A	3.48381e-05	1	172225	ADD	3.48326	1.30014	7.17775	2.13187	NA	CD
3:96900721:A:G	3	96900721	A	G	EPHA6	intron_variant	intron_variant	modifier	intron_variant	NA	NA	NA	NA	NA	NA	NA	NA	NA	intron_variant	3	96900721	A	G	8.41922e-05	1	172225	ADD	2.74268	0.947834	8.37309	2.41928	NA	CD
3:96902035:A:G	3	96902035	A	G	EPHA6	intron_variant	intron_variant	modifier	intron_variant	NA	NA	NA	NA	NA	NA	NA	NA	NA	intron_variant	3	96902035	A	G	1.16127e-05	1	172225	ADD	4.2505	1.40448	9.15903	2.60644	NA	UC
3:96902185:A:T	3	96902185	A	T	EPHA6	intron_variant	intron_variant	modifier	intron_variant	NA	NA	NA	NA	NA	NA	NA	NA	NA	intron_variant	3	96902185	A	T	2.32254e-05	1	172225	ADD	3.59779	1.31236	7.51566	2.2135	NA	CD
3:96902661:G:A	3	96902661	G	A	EPHA6	intron_variant	intron_variant	modifier	intron_variant	NA	NA	NA	NA	NA	NA	NA	NA	NA	intron_variant	3	96902661	G	A	4.06445e-05	1	172225	ADD	3.29363	1.26667	6.76116	2.03076	NA	CD
3:96902756:T:G	3	96902756	T	G	EPHA6	intron_variant	intron_variant	modifier	intron_variant	NA	NA	NA	NA	NA	NA	NA	NA	NA	intron_variant	3	96902756	T	G	8.70954e-06	1	172225	ADD	4.32722	1.46119	8.7701	2.51398	NA	CD
3:96902767:C:A	3	96902767	C	A	EPHA6	intron_variant	intron_variant	modifier	intron_variant	NA	NA	NA	NA	NA	NA	NA	NA	NA	intron_variant	3	96902767	C	A	8.70954e-06	1	172225	ADD	4.19933	1.42828	8.64431	2.48401	NA	UC
3:96902770:G:A	3	96902770	G	A	EPHA6	intron_variant	intron_variant	modifier	intron_variant	NA	NA	NA	NA	NA	NA	NA	NA	NA	intron_variant	3	96902770	G	A	4.06445e-05	1	172225	ADD	3.17305	0.999821	10.0719	2.82232	NA	UC
3:96904955:C:A	3	96904955	C	A	EPHA6	intron_variant	intron_variant	modifier	intron_variant	NA	NA	NA	NA	NA	NA	NA	NA	NA	intron_variant	3	96904955	C	A	2.03223e-05	1	172225	ADD	3.67562	1.33037	7.6334	2.24187	NA	UC
3:96905473:A:T	3	96905473	A	T	EPHA6	intron_variant	intron_variant	modifier	intron_variant	NA	NA	NA	NA	NA	NA	NA	NA	NA	intron_variant	3	96905473	A	T	2.03223e-05	1	172225	ADD	3.43813	1.30816	6.90751	2.06634	NA	UC
3:96905473:A:T	3	96905473	A	T	EPHA6	intron_variant	intron_variant	modifier	intron_variant	NA	NA	NA	NA	NA	NA	NA	NA	NA	intron_variant	3	96905473	A	T	2.03223e-05	1	172225	ADD	3.69855	1.33883	7.63157	2.24143	NA	CD
3:96905521:A:G	3	96905521	A	G	EPHA6	intron_variant	intron_variant	modifier	intron_variant	NA	NA	NA	NA	NA	NA	NA	NA	NA	intron_variant	3	96905521	A	G	0.000418058	1	172225	ADD	1.42346	0.463154	9.44579	2.67441	NA	UC
3:96905708:G:T	3	96905708	G	T	EPHA6	intron_variant	intron_variant	modifier	intron_variant	NA	NA	NA	NA	NA	NA	NA	NA	NA	intron_variant	3	96905708	G	T	0.00043838	1	172225	ADD	1.38818	0.460593	9.0836	2.58853	NA	UC
3:96905771:C:T	3	96905771	C	T	EPHA6	intron_variant	intron_variant	modifier	intron_variant	NA	NA	NA	NA	NA	NA	NA	NA	NA	intron_variant	3	96905771	C	T	0.000153868	1	172225	ADD	1.72476	0.621897	7.69167	2.25589	NA	UC
3:96906195:G:C	3	96906195	G	C	EPHA6	intron_variant	intron_variant	modifier	intron_variant	NA	NA	NA	NA	NA	NA	NA	NA	NA	intron_variant	3	96906195	G	C	8.70954e-06	1	172225	ADD	3.61264	1.35204	7.1396	2.12263	NA	UC
3:96906558:G:A	3	96906558	G	A	EPHA6	intron_variant	intron_variant	modifier	intron_variant	NA	NA	NA	NA	NA	NA	NA	NA	NA	intron_variant	3	96906558	G	A	3.77413e-05	1	172225	ADD	3.40485	1.29737	6.88766	2.06152	NA	CD
3:96906824:T:C	3	96906824	T	C	EPHA6	intron_variant	intron_variant	modifier	intron_variant	NA	NA	NA	NA	NA	NA	NA	NA	NA	intron_variant	3	96906824	T	C	2.90318e-05	1	172225	ADD	3.25125	1.03076	9.94905	2.79336	NA	UC
3:96907606:A:G	3	96907606	A	G	EPHA6	intron_variant	intron_variant	modifier	intron_variant	NA	NA	NA	NA	NA	NA	NA	NA	NA	intron_variant	3	96907606	A	G	8.70954e-06	1	172225	ADD	4.61584	1.46018	9.99283	2.80368	NA	UC
3:96907734:A:T	3	96907734	A	T	EPHA6	intron_variant	intron_variant	modifier	intron_variant	NA	NA	NA	NA	NA	NA	NA	NA	NA	intron_variant	3	96907734	A	T	8.70954e-06	1	172225	ADD	4.17608	1.52627	7.48647	2.20646	NA	UC
3:96908374:T:A	3	96908374	T	A	EPHA6	intron_variant	intron_variant	modifier	intron_variant	NA	NA	NA	NA	NA	NA	NA	NA	NA	intron_variant	3	96908374	T	A	1.16127e-05	1	172225	ADD	4.71501	1.47319	10.2435	2.86274	NA	CD
3:96908523:G:A	3	96908523	G	A	EPHA6	intron_variant	intron_variant	modifier	intron_variant	NA	NA	NA	NA	NA	NA	NA	NA	NA	intron_variant	3	96908523	G	A	2.32254e-05	1	172225	ADD	4.04829	1.37346	8.68788	2.4944	NA	CD
3:96909431:T:C	3	96909431	T	C	EPHA6	intron_variant	intron_variant	modifier	intron_variant	NA	NA	NA	NA	NA	NA	NA	NA	NA	intron_variant	3	96909431	T	C	8.70954e-06	1	172225	ADD	3.91273	1.41624	7.63286	2.24174	NA	UC
3:96909671:T:C	3	96909671	T	C	EPHA6	intron_variant	intron_variant	modifier	intron_variant	NA	NA	NA	NA	NA	NA	NA	NA	NA	intron_variant	3	96909671	T	C	1.74191e-05	1	172225	ADD	3.99701	1.36151	8.61848	2.47786	NA	CD
3:96909708:G:A	3	96909708	G	A	EPHA6	intron_variant	intron_variant	modifier	intron_variant	NA	NA	NA	NA	NA	NA	NA	NA	NA	intron_variant	3	96909708	G	A	1.45159e-05	1	172225	ADD	4.67891	1.44576	10.4737	2.9169	NA	CD
3:96910756:C:G	3	96910756	C	G	EPHA6	intron_variant	intron_variant	modifier	intron_variant	NA	NA	NA	NA	NA	NA	NA	NA	NA	intron_variant	3	96910756	C	G	2.32254e-05	1	172225	ADD	4.72782	1.1349	17.3542	4.50835	NA	CD
3:96910756:C:G	3	96910756	C	G	EPHA6	intron_variant	intron_variant	modifier	intron_variant	NA	NA	NA	NA	NA	NA	NA	NA	NA	intron_variant	3	96910756	C	G	2.32254e-05	1	172225	ADD	2.83687	1.02297	7.69043	2.2556	NA	UC
3:96911378:G:T	3	96911378	G	T	EPHA6	intron_variant	intron_variant	modifier	intron_variant	NA	NA	NA	NA	NA	NA	NA	NA	NA	intron_variant	3	96911378	G	T	1.16127e-05	1	172225	ADD	3.47925	1.32901	6.85351	2.05322	NA	UC
3:96913669:G:T	3	96913669	G	T	EPHA6	intron_variant	intron_variant	modifier	intron_variant	NA	NA	NA	NA	NA	NA	NA	NA	NA	intron_variant	3	96913669	G	T	1.16127e-05	1	172225	ADD	3.48472	1.34153	6.7474	2.02741	NA	UC
3:96913669:G:T	3	96913669	G	T	EPHA6	intron_variant	intron_variant	modifier	intron_variant	NA	NA	NA	NA	NA	NA	NA	NA	NA	intron_variant	3	96913669	G	T	1.16127e-05	1	172225	ADD	5.31266	1.21553	19.1027	4.90703	NA	CD
3:96913693:G:A	3	96913693	G	A	EPHA6	intron_variant	intron_variant	modifier	intron_variant	NA	NA	NA	NA	NA	NA	NA	NA	NA	intron_variant	3	96913693	G	A	8.70954e-06	1	172225	ADD	4.65147	1.73539	7.18435	2.13346	NA	CD
3:96913693:G:A	3	96913693	G	A	EPHA6	intron_variant	intron_variant	modifier	intron_variant	NA	NA	NA	NA	NA	NA	NA	NA	NA	intron_variant	3	96913693	G	A	8.70954e-06	1	172225	ADD	5.18776	1.52733	11.537	3.16606	NA	UC
3:96914148:A:G	3	96914148	A	G	EPHA6	intron_variant	intron_variant	modifier	intron_variant	NA	NA	NA	NA	NA	NA	NA	NA	NA	intron_variant	3	96914148	A	G	1.45159e-05	1	172225	ADD	3.76644	1.34606	7.82948	2.28903	NA	UC
3:96915197:C:G	3	96915197	C	G	EPHA6	intron_variant	intron_variant	modifier	intron_variant	NA	NA	NA	NA	NA	NA	NA	NA	NA	intron_variant	3	96915197	C	G	8.70954e-06	1	172225	ADD	4.85945	1.49335	10.589	2.94399	NA	CD
3:96915427:C:G	3	96915427	C	G	EPHA6	intron_variant	intron_variant	modifier	intron_variant	NA	NA	NA	NA	NA	NA	NA	NA	NA	intron_variant	3	96915427	C	G	2.32254e-05	1	172225	ADD	3.9112	1.38277	8.0006	2.33011	NA	CD
3:96916026:T:C	3	96916026	T	C	EPHA6	intron_variant	intron_variant	modifier	intron_variant	NA	NA	NA	NA	NA	NA	NA	NA	NA	intron_variant	3	96916026	T	C	8.70954e-06	1	172225	ADD	4.01502	1.41713	8.02701	2.33644	NA	UC
3:96918363:C:T	3	96918363	C	T	EPHA6	intron_variant	intron_variant	modifier	intron_variant	NA	NA	NA	NA	NA	NA	NA	NA	NA	intron_variant	3	96918363	C	T	2.61286e-05	1	172225	ADD	3.58494	1.31534	7.42831	2.19243	NA	CD
3:96919002:A:G	3	96919002	A	G	EPHA6	intron_variant	intron_variant	modifier	intron_variant	NA	NA	NA	NA	NA	NA	NA	NA	NA	intron_variant	3	96919002	A	G	8.70954e-06	1	172225	ADD	4.43149	1.52711	8.42098	2.43072	NA	CD
3:96919405:A:G	3	96919405	A	G	EPHA6	intron_variant	intron_variant	modifier	intron_variant	NA	NA	NA	NA	NA	NA	NA	NA	NA	intron_variant	3	96919405	A	G	0.00479025	1	172225	ADD	0.666671	0.243306	7.50788	2.21162	NA	CD
3:96920206:T:G	3	96920206	T	G	EPHA6	intron_variant	intron_variant	modifier	intron_variant	NA	NA	NA	NA	NA	NA	NA	NA	NA	intron_variant	3	96920206	T	G	8.70954e-06	1	172225	ADD	3.96355	1.39029	8.12753	2.36053	NA	UC
3:96920266:TA:T	3	96920266	TA	T	EPHA6	intron_variant	intron_variant	modifier	intron_variant	NA	NA	NA	NA	NA	NA	NA	NA	NA	intron_variant	3	96920266	TA	T	1.16127e-05	1	172225	ADD	3.94029	1.50361	6.86729	2.05657	NA	CD
3:96920266:TA:T	3	96920266	TA	T	EPHA6	intron_variant	intron_variant	modifier	intron_variant	NA	NA	NA	NA	NA	NA	NA	NA	NA	intron_variant	3	96920266	TA	T	1.16127e-05	1	172225	ADD	3.51185	1.33922	6.87649	2.0588	NA	UC
3:96920592:GCT:G	3	96920592	GCT	G	EPHA6	intron_variant	intron_variant	modifier	intron_variant	NA	NA	NA	NA	NA	NA	NA	NA	NA	intron_variant	3	96920592	GCT	G	3.48381e-05	1	172225	ADD	3.49144	1.30566	7.15074	2.12533	NA	CD
3:96920651:G:A	3	96920651	G	A	EPHA6	intron_variant	intron_variant	modifier	intron_variant	NA	NA	NA	NA	NA	NA	NA	NA	NA	intron_variant	3	96920651	G	A	2.32254e-05	1	172225	ADD	3.66364	1.05017	12.1706	3.31382	NA	UC
3:96920847:A:G	3	96920847	A	G	EPHA6	intron_variant	intron_variant	modifier	intron_variant	NA	NA	NA	NA	NA	NA	NA	NA	NA	intron_variant	3	96920847	A	G	1.16127e-05	1	172225	ADD	3.70993	1.3503	7.54872	2.22147	NA	UC
3:96921036:A:G	3	96921036	A	G	EPHA6	intron_variant	intron_variant	modifier	intron_variant	NA	NA	NA	NA	NA	NA	NA	NA	NA	intron_variant	3	96921036	A	G	1.16129e-05	1	172223	ADD	3.99147	1.39618	8.173	2.37142	NA	UC
3:96921040:C:G	3	96921040	C	G	EPHA6	intron_variant	intron_variant	modifier	intron_variant	NA	NA	NA	NA	NA	NA	NA	NA	NA	intron_variant	3	96921040	C	G	8.70964e-06	1	172223	ADD	4.44725	1.44857	9.42553	2.66961	NA	CD
3:96921086:C:A	3	96921086	C	A	EPHA6	intron_variant	intron_variant	modifier	intron_variant	NA	NA	NA	NA	NA	NA	NA	NA	NA	intron_variant	3	96921086	C	A	8.70959e-06	1	172224	ADD	3.49326	1.34486	6.74689	2.02728	NA	UC
3:96921581:C:CT	3	96921581	C	CT	EPHA6	intron_variant	intron_variant	modifier	intron_variant	NA	NA	NA	NA	NA	NA	NA	NA	NA	intron_variant	3	96921581	C	CT	0.000792568	1	172225	ADD	1.28169	0.365457	12.2997	3.34387	NA	UC
3:96922404:A:C	3	96922404	A	C	EPHA6	intron_variant	intron_variant	modifier	intron_variant	NA	NA	NA	NA	NA	NA	NA	NA	NA	intron_variant	3	96922404	A	C	1.16127e-05	1	172225	ADD	4.54352	1.47746	9.45703	2.67708	NA	CD
3:96922643:C:CTT	3	96922643	C	CTT	EPHA6	intron_variant	intron_variant	modifier	intron_variant	NA	NA	NA	NA	NA	NA	NA	NA	NA	intron_variant	3	96922643	C	CTT	8.70954e-06	1	172225	ADD	4.70289	1.49903	9.84256	2.76822	NA	CD
3:96922643:C:CTT	3	96922643	C	CTT	EPHA6	intron_variant	intron_variant	modifier	intron_variant	NA	NA	NA	NA	NA	NA	NA	NA	NA	intron_variant	3	96922643	C	CTT	8.70954e-06	1	172225	ADD	4.13552	1.41254	8.57148	2.46665	NA	UC
3:96932434:A:C	3	96932434	A	C	EPHA6	intron_variant	intron_variant	modifier	intron_variant	NA	NA	NA	NA	NA	NA	NA	NA	NA	intron_variant	3	96932434	A	C	0.000418058	1	172225	ADD	1.42346	0.463154	9.44579	2.67441	NA	UC
3:96932847:TA:T	3	96932847	TA	T	EPHA6	intron_variant	intron_variant	modifier	intron_variant	NA	NA	NA	NA	NA	NA	NA	NA	NA	intron_variant	3	96932847	TA	T	1.74191e-05	1	172225	ADD	3.99701	1.36151	8.61848	2.47786	NA	CD
3:96933368:A:G	3	96933368	A	G	EPHA6	intron_variant	intron_variant	modifier	intron_variant	NA	NA	NA	NA	NA	NA	NA	NA	NA	intron_variant	3	96933368	A	G	0.000418058	1	172225	ADD	1.42346	0.463154	9.44579	2.67441	NA	UC
3:96934459:A:T	3	96934459	A	T	EPHA6	intron_variant	intron_variant	modifier	intron_variant	NA	NA	NA	NA	NA	NA	NA	NA	NA	intron_variant	3	96934459	A	T	0.000418075	1	172218	ADD	1.42345	0.463155	9.44567	2.67439	NA	UC
3:96934573:C:T	3	96934573	C	T	EPHA6	intron_variant	intron_variant	modifier	intron_variant	NA	NA	NA	NA	NA	NA	NA	NA	NA	intron_variant	3	96934573	C	T	1.74205e-05	1	172211	ADD	3.5774	1.32764	7.26061	2.15191	NA	CD
3:96934592:C:T	3	96934592	C	T	EPHA6	intron_variant	intron_variant	modifier	intron_variant	NA	NA	NA	NA	NA	NA	NA	NA	NA	intron_variant	3	96934592	C	T	1.16139e-05	1	172207	ADD	5.42269	1.52472	12.6487	3.42502	NA	CD
3:96934592:C:T	3	96934592	C	T	EPHA6	intron_variant	intron_variant	modifier	intron_variant	NA	NA	NA	NA	NA	NA	NA	NA	NA	intron_variant	3	96934592	C	T	1.16139e-05	1	172207	ADD	4.32855	1.46844	8.68904	2.49467	NA	UC
3:96935182:A:T	3	96935182	A	T	EPHA6	intron_variant	intron_variant	modifier	intron_variant	NA	NA	NA	NA	NA	NA	NA	NA	NA	intron_variant	3	96935182	A	T	1.16128e-05	1	172224	ADD	3.59554	1.35384	7.05327	2.10171	NA	UC
3:96935421:A:G	3	96935421	A	G	EPHA6	intron_variant	intron_variant	modifier	intron_variant	NA	NA	NA	NA	NA	NA	NA	NA	NA	intron_variant	3	96935421	A	G	2.03225e-05	1	172223	ADD	3.12795	1.03976	9.05015	2.58059	NA	UC
3:96935504:C:A	3	96935504	C	A	EPHA6	intron_variant	intron_variant	modifier	intron_variant	NA	NA	NA	NA	NA	NA	NA	NA	NA	intron_variant	3	96935504	C	A	2.03223e-05	1	172225	ADD	3.87085	1.34478	8.28539	2.39832	NA	CD
3:96935559:A:G	3	96935559	A	G	EPHA6	intron_variant	intron_variant	modifier	intron_variant	NA	NA	NA	NA	NA	NA	NA	NA	NA	intron_variant	3	96935559	A	G	2.03225e-05	1	172223	ADD	4.01738	1.36317	8.68532	2.49379	NA	CD
3:96935882:C:T	3	96935882	C	T	EPHA6	intron_variant	intron_variant	modifier	intron_variant	NA	NA	NA	NA	NA	NA	NA	NA	NA	intron_variant	3	96935882	C	T	1.45159e-05	1	172225	ADD	3.55558	1.32244	7.22888	2.14424	NA	UC
3:96935992:T:C	3	96935992	T	C	EPHA6	intron_variant	intron_variant	modifier	intron_variant	NA	NA	NA	NA	NA	NA	NA	NA	NA	intron_variant	3	96935992	T	C	1.45159e-05	1	172225	ADD	3.46517	1.32036	6.88752	2.06148	NA	CD
3:96936120:T:G	3	96936120	T	G	EPHA6	intron_variant	intron_variant	modifier	intron_variant	NA	NA	NA	NA	NA	NA	NA	NA	NA	intron_variant	3	96936120	T	G	1.16127e-05	1	172225	ADD	4.15727	1.4161	8.61839	2.47784	NA	UC
3:96936164:A:AC	3	96936164	A	AC	EPHA6	intron_variant	intron_variant	modifier	intron_variant	NA	NA	NA	NA	NA	NA	NA	NA	NA	intron_variant	3	96936164	A	AC	2.61286e-05	1	172225	ADD	3.71157	1.34629	7.60041	2.23392	NA	CD
3:96942841:A:G	3	96942841	A	G	EPHA6	intron_variant	intron_variant	modifier	intron_variant	NA	NA	NA	NA	NA	NA	NA	NA	NA	intron_variant	3	96942841	A	G	6.67731e-05	1	172225	ADD	2.24427	0.842481	7.09626	2.11213	NA	CD
3:96942888:A:T	3	96942888	A	T	EPHA6	intron_variant	intron_variant	modifier	intron_variant	NA	NA	NA	NA	NA	NA	NA	NA	NA	intron_variant	3	96942888	A	T	1.16127e-05	1	172225	ADD	3.67247	1.35894	7.30324	2.16222	NA	UC
3:96942904:G:A	3	96942904	G	A	EPHA6	intron_variant	intron_variant	modifier	intron_variant	NA	NA	NA	NA	NA	NA	NA	NA	NA	intron_variant	3	96942904	G	A	1.74191e-05	1	172225	ADD	3.4041	1.29938	6.86329	2.05559	NA	CD
3:96943499:C:T	3	96943499	C	T	EPHA6	intron_variant	intron_variant	modifier	intron_variant	NA	NA	NA	NA	NA	NA	NA	NA	NA	intron_variant	3	96943499	C	T	1.16127e-05	1	172225	ADD	3.61747	1.34613	7.2217	2.1425	NA	UC
3:96943705:G:A	3	96943705	G	A	EPHA6	intron_variant	intron_variant	modifier	intron_variant	NA	NA	NA	NA	NA	NA	NA	NA	NA	intron_variant	3	96943705	G	A	1.45159e-05	1	172225	ADD	3.58863	1.3454	7.11461	2.11657	NA	UC
3:96945522:C:G	3	96945522	C	G	EPHA6	intron_variant	intron_variant	modifier	intron_variant	NA	NA	NA	NA	NA	NA	NA	NA	NA	intron_variant	3	96945522	C	G	9.58049e-05	1	172225	ADD	2.44882	0.76719	10.1885	2.84979	NA	UC
3:96948737:G:A	3	96948737	G	A	EPHA6	intron_variant	intron_variant	modifier	intron_variant	NA	NA	NA	NA	NA	NA	NA	NA	NA	intron_variant	3	96948737	G	A	6.96763e-05	1	172225	ADD	2.80237	0.95922	8.53524	2.458	NA	CD
3:96948934:T:A	3	96948934	T	A	EPHA6	intron_variant	intron_variant	modifier	intron_variant	NA	NA	NA	NA	NA	NA	NA	NA	NA	intron_variant	3	96948934	T	A	1.45159e-05	1	172225	ADD	4.1517	1.41094	8.65834	2.48736	NA	CD
3:96950355:A:G	3	96950355	A	G	EPHA6	intron_variant	intron_variant	modifier	intron_variant	NA	NA	NA	NA	NA	NA	NA	NA	NA	intron_variant	3	96950355	A	G	1.74191e-05	1	172225	ADD	4.14425	1.40776	8.66637	2.48927	NA	CD
3:96951033:A:G	3	96951033	A	G	EPHA6	intron_variant	intron_variant	modifier	intron_variant	NA	NA	NA	NA	NA	NA	NA	NA	NA	intron_variant	3	96951033	A	G	8.70954e-06	1	172225	ADD	4.62265	1.45879	10.0414	2.81514	NA	UC
3:96951436:A:G	3	96951436	A	G	EPHA6	intron_variant	intron_variant	modifier	intron_variant	NA	NA	NA	NA	NA	NA	NA	NA	NA	intron_variant	3	96951436	A	G	1.45159e-05	1	172225	ADD	3.81494	1.34969	7.98935	2.32741	NA	UC
3:96951773:T:G	3	96951773	T	G	EPHA6	intron_variant	intron_variant	modifier	intron_variant	NA	NA	NA	NA	NA	NA	NA	NA	NA	intron_variant	3	96951773	T	G	1.16127e-05	1	172225	ADD	3.87053	1.38583	7.80048	2.28206	NA	UC
3:96951809:T:C	3	96951809	T	C	EPHA6	intron_variant	intron_variant	modifier	intron_variant	NA	NA	NA	NA	NA	NA	NA	NA	NA	intron_variant	3	96951809	T	C	1.45159e-05	1	172225	ADD	3.50565	1.31518	7.10503	2.11425	NA	UC
3:96951949:T:C	3	96951949	T	C	EPHA6	intron_variant	intron_variant	modifier	intron_variant	NA	NA	NA	NA	NA	NA	NA	NA	NA	intron_variant	3	96951949	T	C	5.22572e-05	1	172225	ADD	2.91796	0.956505	9.30644	2.6414	NA	UC
3:96952079:C:G	3	96952079	C	G	EPHA6	intron_variant	intron_variant	modifier	intron_variant	NA	NA	NA	NA	NA	NA	NA	NA	NA	intron_variant	3	96952079	C	G	1.74191e-05	1	172225	ADD	3.63194	1.3212	7.55687	2.22343	NA	UC
3:96955880:AC:A	3	96955880	AC	A	EPHA6	intron_variant	intron_variant	modifier	intron_variant	NA	NA	NA	NA	NA	NA	NA	NA	NA	intron_variant	3	96955880	AC	A	1.45159e-05	1	172225	ADD	3.63384	1.34424	7.30761	2.16328	NA	CD
3:96957777:T:C	3	96957777	T	C	EPHA6	intron_variant	intron_variant	modifier	intron_variant	NA	NA	NA	NA	NA	NA	NA	NA	NA	intron_variant	3	96957777	T	C	0.000418058	1	172225	ADD	1.42346	0.463154	9.44579	2.67441	NA	UC
3:96959812:A:G	3	96959812	A	G	EPHA6	intron_variant	intron_variant	modifier	intron_variant	NA	NA	NA	NA	NA	NA	NA	NA	NA	intron_variant	3	96959812	A	G	2.61286e-05	1	172225	ADD	3.79225	1.34581	7.94008	2.31559	NA	CD
3:96959868:G:A	3	96959868	G	A	EPHA6	intron_variant	intron_variant	modifier	intron_variant	NA	NA	NA	NA	NA	NA	NA	NA	NA	intron_variant	3	96959868	G	A	1.45159e-05	1	172225	ADD	3.5628	1.36309	6.83179	2.04794	NA	UC
3:96960249:G:A	3	96960249	G	A	EPHA6	intron_variant	intron_variant	modifier	intron_variant	NA	NA	NA	NA	NA	NA	NA	NA	NA	intron_variant	3	96960249	G	A	1.74191e-05	1	172225	ADD	2.17161	0.798661	7.39333	2.18398	NA	CD
3:96962518:G:A	3	96962518	G	A	EPHA6	intron_variant	intron_variant	modifier	intron_variant	NA	NA	NA	NA	NA	NA	NA	NA	NA	intron_variant	3	96962518	G	A	5.80636e-05	1	172225	ADD	2.45273	0.911518	7.2405	2.14705	NA	UC
3:96962782:G:A	3	96962782	G	A	EPHA6	intron_variant	intron_variant	modifier	intron_variant	NA	NA	NA	NA	NA	NA	NA	NA	NA	intron_variant	3	96962782	G	A	3.48381e-05	1	172225	ADD	3.48326	1.30014	7.17775	2.13187	NA	CD
3:96963213:C:A	3	96963213	C	A	EPHA6	intron_variant	intron_variant	modifier	intron_variant	NA	NA	NA	NA	NA	NA	NA	NA	NA	intron_variant	3	96963213	C	A	1.16127e-05	1	172225	ADD	4.42322	1.4341	9.51298	2.69032	NA	CD
3:96963569:G:T	3	96963569	G	T	EPHA6	intron_variant	intron_variant	modifier	intron_variant	NA	NA	NA	NA	NA	NA	NA	NA	NA	intron_variant	3	96963569	G	T	8.70954e-06	1	172225	ADD	3.86505	1.41453	7.46594	2.20151	NA	UC
3:96963619:T:C	3	96963619	T	C	EPHA6	intron_variant	intron_variant	modifier	intron_variant	NA	NA	NA	NA	NA	NA	NA	NA	NA	intron_variant	3	96963619	T	C	8.70954e-06	1	172225	ADD	4.65523	1.5086	9.52219	2.6925	NA	UC
3:96966826:T:C	3	96966826	T	C	EPHA6	intron_variant	intron_variant	modifier	intron_variant	NA	NA	NA	NA	NA	NA	NA	NA	NA	intron_variant	3	96966826	T	C	2.61286e-05	1	172225	ADD	3.43117	1.30444	6.91886	2.0691	NA	CD
3:96967779:G:A	3	96967779	G	A	EPHA6	intron_variant	intron_variant	modifier	intron_variant	NA	NA	NA	NA	NA	NA	NA	NA	NA	intron_variant	3	96967779	G	A	8.70954e-06	1	172225	ADD	4.71681	1.52573	9.55742	2.70083	NA	CD
3:96967779:G:A	3	96967779	G	A	EPHA6	intron_variant	intron_variant	modifier	intron_variant	NA	NA	NA	NA	NA	NA	NA	NA	NA	intron_variant	3	96967779	G	A	8.70954e-06	1	172225	ADD	4.85212	1.48057	10.74	2.97946	NA	UC
3:96968197:A:G	3	96968197	A	G	EPHA6	intron_variant	intron_variant	modifier	intron_variant	NA	NA	NA	NA	NA	NA	NA	NA	NA	intron_variant	3	96968197	A	G	2.61286e-05	1	172225	ADD	3.33674	1.28075	6.78756	2.03718	NA	UC
3:96968388:G:GCACACA	3	96968388	G	GCACACA	EPHA6	intron_variant	intron_variant	modifier	intron_variant	NA	NA	NA	NA	NA	NA	NA	NA	NA	intron_variant	3	96968388	G	GCACACA	3.1935e-05	1	172225	ADD	3.34602	1.29417	6.68463	2.01212	NA	CD
3:96968682:TC:T	3	96968682	TC	T	EPHA6	intron_variant	intron_variant	modifier	intron_variant	NA	NA	NA	NA	NA	NA	NA	NA	NA	intron_variant	3	96968682	TC	T	1.74191e-05	1	172225	ADD	3.79556	1.42057	7.13885	2.12245	NA	CD
3:96968941:C:G	3	96968941	C	G	EPHA6	intron_variant	intron_variant	modifier	intron_variant	NA	NA	NA	NA	NA	NA	NA	NA	NA	intron_variant	3	96968941	C	G	1.16127e-05	1	172225	ADD	4.00118	1.42888	7.84122	2.29185	NA	UC
3:96969156:TATC:T	3	96969156	TATC	T	EPHA6	intron_variant	intron_variant	modifier	intron_variant	NA	NA	NA	NA	NA	NA	NA	NA	NA	intron_variant	3	96969156	TATC	T	2.90318e-05	1	172225	ADD	3.18983	0.992488	10.3296	2.88302	NA	UC
3:96969597:G:A	3	96969597	G	A	EPHA6	intron_variant	intron_variant	modifier	intron_variant	NA	NA	NA	NA	NA	NA	NA	NA	NA	intron_variant	3	96969597	G	A	8.70954e-05	1	172225	ADD	2.31168	0.892526	6.70831	2.01789	NA	CD
3:96971484:C:G	3	96971484	C	G	EPHA6	intron_variant	intron_variant	modifier	intron_variant	NA	NA	NA	NA	NA	NA	NA	NA	NA	intron_variant	3	96971484	C	G	1.74191e-05	1	172225	ADD	4.17823	1.38072	9.15737	2.60604	NA	UC
3:96971821:C:G	3	96971821	C	G	EPHA6	intron_variant	intron_variant	modifier	intron_variant	NA	NA	NA	NA	NA	NA	NA	NA	NA	intron_variant	3	96971821	C	G	0.000420961	1	172225	ADD	1.42091	0.462963	9.41977	2.66825	NA	UC
3:96972666:T:G	3	96972666	T	G	EPHA6	intron_variant	intron_variant	modifier	intron_variant	NA	NA	NA	NA	NA	NA	NA	NA	NA	intron_variant	3	96972666	T	G	1.16127e-05	1	172225	ADD	3.67626	1.34631	7.45631	2.19918	NA	CD
3:96972793:C:T	3	96972793	C	T	EPHA6	intron_variant	intron_variant	modifier	intron_variant	NA	NA	NA	NA	NA	NA	NA	NA	NA	intron_variant	3	96972793	C	T	1.16127e-05	1	172225	ADD	3.83107	1.45463	6.93642	2.07336	NA	CD
3:96972807:A:C	3	96972807	A	C	EPHA6	intron_variant	intron_variant	modifier	intron_variant	NA	NA	NA	NA	NA	NA	NA	NA	NA	intron_variant	3	96972807	A	C	1.16127e-05	1	172225	ADD	4.14179	1.38809	8.90313	2.54564	NA	UC
3:96972949:C:A	3	96972949	C	A	EPHA6	intron_variant	intron_variant	modifier	intron_variant	NA	NA	NA	NA	NA	NA	NA	NA	NA	intron_variant	3	96972949	C	A	2.90318e-05	1	172225	ADD	3.78446	1.35876	7.75747	2.27172	NA	CD
3:96973148:A:G	3	96973148	A	G	EPHA6	intron_variant	intron_variant	modifier	intron_variant	NA	NA	NA	NA	NA	NA	NA	NA	NA	intron_variant	3	96973148	A	G	1.74191e-05	1	172225	ADD	3.78941	1.37101	7.63949	2.24333	NA	UC
3:96974506:A:T	3	96974506	A	T	EPHA6	intron_variant	intron_variant	modifier	intron_variant	NA	NA	NA	NA	NA	NA	NA	NA	NA	intron_variant	3	96974506	A	T	1.16127e-05	1	172225	ADD	3.92434	1.3973	7.88779	2.30303	NA	UC
3:96974550:A:G	3	96974550	A	G	EPHA6	intron_variant	intron_variant	modifier	intron_variant	NA	NA	NA	NA	NA	NA	NA	NA	NA	intron_variant	3	96974550	A	G	1.74191e-05	1	172225	ADD	3.77229	1.35251	7.77911	2.27692	NA	CD
3:96974651:T:C	3	96974651	T	C	EPHA6	intron_variant	intron_variant	modifier	intron_variant	NA	NA	NA	NA	NA	NA	NA	NA	NA	intron_variant	3	96974651	T	C	1.45159e-05	1	172225	ADD	3.49657	1.33209	6.88995	2.06207	NA	UC
3:96974651:T:C	3	96974651	T	C	EPHA6	intron_variant	intron_variant	modifier	intron_variant	NA	NA	NA	NA	NA	NA	NA	NA	NA	intron_variant	3	96974651	T	C	1.45159e-05	1	172225	ADD	4.30792	1.42843	9.09535	2.59132	NA	CD
3:96974667:A:G	3	96974667	A	G	EPHA6	intron_variant	intron_variant	modifier	intron_variant	NA	NA	NA	NA	NA	NA	NA	NA	NA	intron_variant	3	96974667	A	G	0.000435477	1	172225	ADD	1.39204	0.461003	9.11794	2.59668	NA	UC
3:96974737:C:T	3	96974737	C	T	EPHA6	intron_variant	intron_variant	modifier	intron_variant	NA	NA	NA	NA	NA	NA	NA	NA	NA	intron_variant	3	96974737	C	T	0.000124837	1	172225	ADD	2.32438	0.886513	6.87456	2.05833	NA	CD
3:96978513:ATCTT:A	3	96978513	ATCTT	A	EPHA6	intron_variant	intron_variant	modifier	intron_variant	NA	NA	NA	NA	NA	NA	NA	NA	NA	intron_variant	3	96978513	ATCTT	A	8.70954e-06	1	172225	ADD	3.93486	1.42377	7.638	2.24297	NA	CD
3:96978745:G:C	3	96978745	G	C	EPHA6	intron_variant	intron_variant	modifier	intron_variant	NA	NA	NA	NA	NA	NA	NA	NA	NA	intron_variant	3	96978745	G	C	1.74191e-05	1	172225	ADD	4.2565	1.09661	15.0661	3.98376	NA	UC
3:96985990:A:G	3	96985990	A	G	EPHA6	intron_variant	intron_variant	modifier	intron_variant	NA	NA	NA	NA	NA	NA	NA	NA	NA	intron_variant	3	96985990	A	G	0.00075773	1	172225	ADD	1.43605	0.492074	8.51684	2.45361	NA	CD
3:96987325:T:G	3	96987325	T	G	EPHA6	splice_region_variant&splice_polypyrimidine_tract_variant&intron_variant	splice_region_variant	low	intron_variant	NA	NA	NA	NA	NA	NA	NA	NA	NA	splice_region_variant&splice_polypyrimidine_tract_variant&intron_variant	3	96987325	T	G	1.45159e-05	1	172225	ADD	3.99107	1.36757	8.51687	2.45362	NA	CD
3:96987946:GGTGCATCTGCA:G	3	96987946	GGTGCATCTGCA	G	EPHA6	frameshift_variant	frameshift_variant	high	coding_sequence_variant	highConf	NA	NA	NA	NA	NA	NA	NA	NA	frameshift_variant	3	96987946	GGTGCATCTGCA	G	1.45159e-05	1	172225	ADD	4.17428	1.42742	8.55184	2.46196	NA	CD
3:96988212:A:C	3	96988212	A	C	EPHA6	intron_variant	intron_variant	modifier	intron_variant	NA	NA	NA	NA	NA	NA	NA	NA	NA	intron_variant	3	96988212	A	C	8.70954e-06	1	172225	ADD	4.43431	1.43541	9.54331	2.6975	NA	CD
3:96988212:A:C	3	96988212	A	C	EPHA6	intron_variant	intron_variant	modifier	intron_variant	NA	NA	NA	NA	NA	NA	NA	NA	NA	intron_variant	3	96988212	A	C	8.70954e-06	1	172225	ADD	4.4789	1.49572	8.96694	2.56081	NA	UC
3:96988294:A:G	3	96988294	A	G	EPHA6	intron_variant	intron_variant	modifier	intron_variant	NA	NA	NA	NA	NA	NA	NA	NA	NA	intron_variant	3	96988294	A	G	2.32254e-05	1	172225	ADD	3.46724	1.30192	7.09254	2.11123	NA	CD
3:96988323:G:T	3	96988323	G	T	EPHA6	intron_variant	intron_variant	modifier	intron_variant	NA	NA	NA	NA	NA	NA	NA	NA	NA	intron_variant	3	96988323	G	T	8.70954e-06	1	172225	ADD	4.17134	1.40487	8.81617	2.52495	NA	UC
3:96988335:G:T	3	96988335	G	T	EPHA6	intron_variant	intron_variant	modifier	intron_variant	NA	NA	NA	NA	NA	NA	NA	NA	NA	intron_variant	3	96988335	G	T	1.16127e-05	1	172225	ADD	3.97539	1.5337	6.71863	2.0204	NA	CD
3:96988432:A:G	3	96988432	A	G	EPHA6	intron_variant	intron_variant	modifier	intron_variant	NA	NA	NA	NA	NA	NA	NA	NA	NA	intron_variant	3	96988432	A	G	0.000435477	1	172225	ADD	1.39204	0.461003	9.11794	2.59668	NA	UC
3:96988699:A:G	3	96988699	A	G	EPHA6	intron_variant	intron_variant	modifier	intron_variant	NA	NA	NA	NA	NA	NA	NA	NA	NA	intron_variant	3	96988699	A	G	1.16127e-05	1	172225	ADD	4.64586	1.44869	10.2845	2.8724	NA	CD
3:96989009:G:GA	3	96989009	G	GA	EPHA6	intron_variant	intron_variant	modifier	intron_variant	NA	NA	NA	NA	NA	NA	NA	NA	NA	intron_variant	3	96989009	G	GA	1.45159e-05	1	172225	ADD	3.76216	1.4196	7.02327	2.09444	NA	CD
3:96989101:C:G	3	96989101	C	G	EPHA6	intron_variant	intron_variant	modifier	intron_variant	NA	NA	NA	NA	NA	NA	NA	NA	NA	intron_variant	3	96989101	C	G	8.70954e-06	1	172225	ADD	4.32559	1.43232	9.12036	2.59726	NA	UC
3:96989261:T:C	3	96989261	T	C	EPHA6	intron_variant	intron_variant	modifier	intron_variant	NA	NA	NA	NA	NA	NA	NA	NA	NA	intron_variant	3	96989261	T	C	1.45159e-05	1	172225	ADD	3.3946	1.31308	6.68331	2.0118	NA	UC
3:96989261:T:C	3	96989261	T	C	EPHA6	intron_variant	intron_variant	modifier	intron_variant	NA	NA	NA	NA	NA	NA	NA	NA	NA	intron_variant	3	96989261	T	C	1.45159e-05	1	172225	ADD	3.85073	1.36273	7.98487	2.32633	NA	CD
3:96989468:A:C	3	96989468	A	C	EPHA6	intron_variant	intron_variant	modifier	intron_variant	NA	NA	NA	NA	NA	NA	NA	NA	NA	intron_variant	3	96989468	A	C	1.45159e-05	1	172225	ADD	3.51567	1.3449	6.83344	2.04834	NA	CD
3:96989969:G:C	3	96989969	G	C	EPHA6	intron_variant	intron_variant	modifier	intron_variant	NA	NA	NA	NA	NA	NA	NA	NA	NA	intron_variant	3	96989969	G	C	8.70954e-06	1	172225	ADD	5.17842	1.6167	10.2598	2.86658	NA	CD
3:96990145:T:G	3	96990145	T	G	EPHA6	intron_variant	intron_variant	modifier	intron_variant	NA	NA	NA	NA	NA	NA	NA	NA	NA	intron_variant	3	96990145	T	G	0.000168384	1	172225	ADD	2.31518	0.765316	9.15143	2.60463	NA	CD
3:96990989:C:A	3	96990989	C	A	EPHA6	intron_variant	intron_variant	modifier	intron_variant	NA	NA	NA	NA	NA	NA	NA	NA	NA	intron_variant	3	96990989	C	A	1.16127e-05	1	172225	ADD	3.75266	1.39016	7.28699	2.15829	NA	UC
3:96992802:T:G	3	96992802	T	G	EPHA6	intron_variant	intron_variant	modifier	intron_variant	NA	NA	NA	NA	NA	NA	NA	NA	NA	intron_variant	3	96992802	T	G	1.16127e-05	1	172225	ADD	3.89849	1.38891	7.87858	2.30082	NA	UC
3:96993795:GC:G	3	96993795	GC	G	EPHA6	intron_variant	intron_variant	modifier	intron_variant	NA	NA	NA	NA	NA	NA	NA	NA	NA	intron_variant	3	96993795	GC	G	0.00075773	1	172225	ADD	1.43605	0.492074	8.51684	2.45361	NA	CD
3:96994458:T:G	3	96994458	T	G	EPHA6	intron_variant	intron_variant	modifier	intron_variant	NA	NA	NA	NA	NA	NA	NA	NA	NA	intron_variant	3	96994458	T	G	1.16127e-05	1	172225	ADD	4.13241	1.38883	8.85335	2.5338	NA	UC
3:96994478:G:A	3	96994478	G	A	EPHA6	intron_variant	intron_variant	modifier	intron_variant	NA	NA	NA	NA	NA	NA	NA	NA	NA	intron_variant	3	96994478	G	A	0.000400639	1	172225	ADD	1.64009	0.448314	13.3836	3.59544	NA	UC
3:96994672:C:G	3	96994672	C	G	EPHA6	intron_variant	intron_variant	modifier	intron_variant	NA	NA	NA	NA	NA	NA	NA	NA	NA	intron_variant	3	96994672	C	G	1.16127e-05	1	172225	ADD	3.81473	1.42708	7.14551	2.12406	NA	UC
3:96999591:T:C	3	96999591	T	C	EPHA6	intron_variant	intron_variant	modifier	intron_variant	NA	NA	NA	NA	NA	NA	NA	NA	NA	intron_variant	3	96999591	T	C	1.74191e-05	1	172225	ADD	3.51789	1.32252	7.07559	2.10712	NA	CD
3:96999694:T:A	3	96999694	T	A	EPHA6	intron_variant	intron_variant	modifier	intron_variant	NA	NA	NA	NA	NA	NA	NA	NA	NA	intron_variant	3	96999694	T	A	1.45159e-05	1	172225	ADD	3.76644	1.34606	7.82948	2.28903	NA	UC
3:97000580:T:C	3	97000580	T	C	EPHA6	intron_variant	intron_variant	modifier	intron_variant	NA	NA	NA	NA	NA	NA	NA	NA	NA	intron_variant	3	97000580	T	C	8.70954e-06	1	172225	ADD	4.38034	1.46911	8.89008	2.54253	NA	CD
3:97001910:A:T	3	97001910	A	T	EPHA6	intron_variant	intron_variant	modifier	intron_variant	NA	NA	NA	NA	NA	NA	NA	NA	NA	intron_variant	3	97001910	A	T	2.61286e-05	1	172225	ADD	3.53711	1.30456	7.35144	2.17387	NA	CD
3:97003012:CAG:C	3	97003012	CAG	C	EPHA6	intron_variant	intron_variant	modifier	intron_variant	NA	NA	NA	NA	NA	NA	NA	NA	NA	intron_variant	3	97003012	CAG	C	3.1935e-05	1	172225	ADD	3.52924	1.0421	11.4695	3.15028	NA	CD
3:97003395:TTAAC:T	3	97003395	TTAAC	T	EPHA6	intron_variant	intron_variant	modifier	intron_variant	NA	NA	NA	NA	NA	NA	NA	NA	NA	intron_variant	3	97003395	TTAAC	T	8.70954e-06	1	172225	ADD	4.15463	1.41827	8.58124	2.46898	NA	UC
3:97003481:T:A	3	97003481	T	A	EPHA6	intron_variant	intron_variant	modifier	intron_variant	NA	NA	NA	NA	NA	NA	NA	NA	NA	intron_variant	3	97003481	T	A	1.45159e-05	1	172225	ADD	3.85953	1.36752	7.96532	2.32165	NA	UC
3:97010492:A:G	3	97010492	A	G	EPHA6	intron_variant;downstream_gene_variant	intron_variant	modifier	intron_variant	NA	NA	NA	NA	NA	NA	NA	NA	NA	intron_variant;downstream_gene_variant	3	97010492	A	G	1.45159e-05	1	172225	ADD	3.7293	1.35879	7.5327	2.21761	NA	UC
3:97010623:T:G	3	97010623	T	G	EPHA6	intron_variant;downstream_gene_variant	intron_variant	modifier	intron_variant	NA	NA	NA	NA	NA	NA	NA	NA	NA	intron_variant;downstream_gene_variant	3	97010623	T	G	1.45159e-05	1	172225	ADD	3.37453	1.30756	6.66049	2.00624	NA	UC
3:97010860:A:G	3	97010860	A	G	EPHA6	intron_variant;downstream_gene_variant	intron_variant	modifier	intron_variant	NA	NA	NA	NA	NA	NA	NA	NA	NA	intron_variant;downstream_gene_variant	3	97010860	A	G	3.48381e-05	1	172225	ADD	2.55578	0.952878	7.19406	2.13581	NA	UC
3:97013596:T:C	3	97013596	T	C	EPHA6	intron_variant;downstream_gene_variant	intron_variant	modifier	intron_variant	NA	NA	NA	NA	NA	NA	NA	NA	NA	intron_variant;downstream_gene_variant	3	97013596	T	C	8.70954e-06	1	172225	ADD	3.78355	1.37187	7.60625	2.23533	NA	UC
3:97014551:A:C	3	97014551	A	C	EPHA6	intron_variant;downstream_gene_variant	intron_variant	modifier	intron_variant	NA	NA	NA	NA	NA	NA	NA	NA	NA	intron_variant;downstream_gene_variant	3	97014551	A	C	3.1935e-05	1	172225	ADD	3.3805	1.2918	6.84809	2.0519	NA	CD
3:97015353:A:G	3	97015353	A	G	EPHA6	intron_variant	intron_variant	modifier	intron_variant	NA	NA	NA	NA	NA	NA	NA	NA	NA	intron_variant	3	97015353	A	G	1.45159e-05	1	172225	ADD	3.9236	1.39431	7.91862	2.31044	NA	CD
3:97016097:A:G	3	97016097	A	G	EPHA6	intron_variant	intron_variant	modifier	intron_variant	NA	NA	NA	NA	NA	NA	NA	NA	NA	intron_variant	3	97016097	A	G	0.000435477	1	172225	ADD	1.39204	0.461003	9.11794	2.59668	NA	UC
3:97018216:T:C	3	97018216	T	C	EPHA6	intron_variant	intron_variant	modifier	intron_variant	NA	NA	NA	NA	NA	NA	NA	NA	NA	intron_variant	3	97018216	T	C	4.64509e-05	1	172225	ADD	2.52636	0.926037	7.44275	2.19591	NA	UC
3:97020255:T:C	3	97020255	T	C	EPHA6	intron_variant	intron_variant	modifier	intron_variant	NA	NA	NA	NA	NA	NA	NA	NA	NA	intron_variant	3	97020255	T	C	1.16127e-05	1	172225	ADD	3.63116	1.34629	7.27469	2.15532	NA	UC
3:97020623:G:C	3	97020623	G	C	EPHA6	intron_variant	intron_variant	modifier	intron_variant	NA	NA	NA	NA	NA	NA	NA	NA	NA	intron_variant	3	97020623	G	C	8.70954e-06	1	172225	ADD	4.11034	1.41232	8.47014	2.44246	NA	UC
3:97021996:G:C	3	97021996	G	C	EPHA6	intron_variant	intron_variant	modifier	intron_variant	NA	NA	NA	NA	NA	NA	NA	NA	NA	intron_variant	3	97021996	G	C	2.32254e-05	1	172225	ADD	3.9777	1.36319	8.51434	2.45302	NA	CD
3:97024649:C:T	3	97024649	C	T	EPHA6	intron_variant	intron_variant	modifier	intron_variant	NA	NA	NA	NA	NA	NA	NA	NA	NA	intron_variant	3	97024649	C	T	8.70954e-06	1	172225	ADD	3.55848	1.35019	6.94607	2.0757	NA	UC
3:97024797:T:C	3	97024797	T	C	EPHA6	intron_variant	intron_variant	modifier	intron_variant	NA	NA	NA	NA	NA	NA	NA	NA	NA	intron_variant	3	97024797	T	C	1.45159e-05	1	172225	ADD	4.55508	1.46389	9.68226	2.73036	NA	CD
3:97027586:A:G	3	97027586	A	G	EPHA6	intron_variant	intron_variant	modifier	intron_variant	NA	NA	NA	NA	NA	NA	NA	NA	NA	intron_variant	3	97027586	A	G	1.45159e-05	1	172225	ADD	3.50393	1.33869	6.85094	2.05259	NA	UC
3:97028019:G:T	3	97028019	G	T	EPHA6	intron_variant	intron_variant	modifier	intron_variant	NA	NA	NA	NA	NA	NA	NA	NA	NA	intron_variant	3	97028019	G	T	8.70954e-06	1	172225	ADD	4.29404	1.52569	7.92132	2.31109	NA	CD
3:97028898:G:A	3	97028898	G	A	EPHA6	intron_variant	intron_variant	modifier	intron_variant	NA	NA	NA	NA	NA	NA	NA	NA	NA	intron_variant	3	97028898	G	A	8.70954e-06	1	172225	ADD	4.77733	1.53428	9.69532	2.73344	NA	UC
3:97029107:T:A	3	97029107	T	A	EPHA6	intron_variant	intron_variant	modifier	intron_variant	NA	NA	NA	NA	NA	NA	NA	NA	NA	intron_variant	3	97029107	T	A	1.74199e-05	1	172217	ADD	4.76673	1.50005	10.0979	2.82846	NA	CD
3:97029433:G:T	3	97029433	G	T	EPHA6	intron_variant	intron_variant	modifier	intron_variant	NA	NA	NA	NA	NA	NA	NA	NA	NA	intron_variant	3	97029433	G	T	1.16127e-05	1	172225	ADD	4.33463	1.41495	9.38467	2.65994	NA	UC
3:97029884:C:T	3	97029884	C	T	EPHA6	intron_variant	intron_variant	modifier	intron_variant	NA	NA	NA	NA	NA	NA	NA	NA	NA	intron_variant	3	97029884	C	T	1.45159e-05	1	172225	ADD	3.40949	1.30284	6.84847	2.05199	NA	UC
3:97030465:C:T	3	97030465	C	T	EPHA6	intron_variant	intron_variant	modifier	intron_variant	NA	NA	NA	NA	NA	NA	NA	NA	NA	intron_variant	3	97030465	C	T	4.35477e-05	1	172225	ADD	2.96652	0.960496	9.53901	2.69648	NA	UC
3:97030701:G:A	3	97030701	G	A	EPHA6	intron_variant	intron_variant	modifier	intron_variant	NA	NA	NA	NA	NA	NA	NA	NA	NA	intron_variant	3	97030701	G	A	2.32254e-05	1	172225	ADD	4.09663	1.36953	8.94765	2.55623	NA	CD
3:97030735:A:G	3	97030735	A	G	EPHA6	intron_variant	intron_variant	modifier	intron_variant	NA	NA	NA	NA	NA	NA	NA	NA	NA	intron_variant	3	97030735	A	G	2.03223e-05	1	172225	ADD	3.4283	1.3033	6.91941	2.06923	NA	UC
3:97033040:C:A	3	97033040	C	A	EPHA6	intron_variant	intron_variant	modifier	intron_variant	NA	NA	NA	NA	NA	NA	NA	NA	NA	intron_variant	3	97033040	C	A	2.90318e-05	1	172225	ADD	2.7676	0.966486	8.20002	2.37789	NA	UC
3:97033154:G:A	3	97033154	G	A	EPHA6	intron_variant	intron_variant	modifier	intron_variant	NA	NA	NA	NA	NA	NA	NA	NA	NA	intron_variant	3	97033154	G	A	4.06445e-05	1	172225	ADD	3.41529	1.28346	7.0809	2.10841	NA	CD
3:97033317:T:G	3	97033317	T	G	EPHA6	intron_variant	intron_variant	modifier	intron_variant	NA	NA	NA	NA	NA	NA	NA	NA	NA	intron_variant	3	97033317	T	G	8.70954e-06	1	172225	ADD	5.03485	1.49728	11.3075	3.11242	NA	CD
3:97035120:G:A	3	97035120	G	A	EPHA6	intron_variant	intron_variant	modifier	intron_variant	NA	NA	NA	NA	NA	NA	NA	NA	NA	intron_variant	3	97035120	G	A	8.70954e-06	1	172225	ADD	4.76344	1.4837	10.3074	2.87779	NA	CD
3:97035431:C:T	3	97035431	C	T	EPHA6	intron_variant	intron_variant	modifier	intron_variant	NA	NA	NA	NA	NA	NA	NA	NA	NA	intron_variant	3	97035431	C	T	0.000420961	1	172225	ADD	1.42091	0.462963	9.41977	2.66825	NA	UC
3:97035591:G:A	3	97035591	G	A	EPHA6	intron_variant	intron_variant	modifier	intron_variant	NA	NA	NA	NA	NA	NA	NA	NA	NA	intron_variant	3	97035591	G	A	1.16127e-05	1	172225	ADD	3.95687	1.45323	7.41372	2.18891	NA	UC
3:97035841:G:A	3	97035841	G	A	EPHA6	intron_variant	intron_variant	modifier	intron_variant	NA	NA	NA	NA	NA	NA	NA	NA	NA	intron_variant	3	97035841	G	A	8.70954e-06	1	172225	ADD	4.19562	1.43882	8.50315	2.45034	NA	CD
3:97036236:T:C	3	97036236	T	C	EPHA6	intron_variant	intron_variant	modifier	intron_variant	NA	NA	NA	NA	NA	NA	NA	NA	NA	intron_variant	3	97036236	T	C	0.00705763	1	172225	ADD	0.457643	0.165867	7.6126	2.23686	NA	UC
3:97036303:T:A	3	97036303	T	A	EPHA6	intron_variant	intron_variant	modifier	intron_variant	NA	NA	NA	NA	NA	NA	NA	NA	NA	intron_variant	3	97036303	T	A	3.1935e-05	1	172225	ADD	2.65985	0.958578	7.69947	2.25777	NA	UC
3:97036448:T:C	3	97036448	T	C	EPHA6	intron_variant	intron_variant	modifier	intron_variant	NA	NA	NA	NA	NA	NA	NA	NA	NA	intron_variant	3	97036448	T	C	8.70954e-06	1	172225	ADD	3.80615	1.38543	7.54752	2.22118	NA	UC
3:97036478:G:T	3	97036478	G	T	EPHA6	intron_variant	intron_variant	modifier	intron_variant	NA	NA	NA	NA	NA	NA	NA	NA	NA	intron_variant	3	97036478	G	T	0.000420961	1	172225	ADD	1.42091	0.462963	9.41977	2.66825	NA	UC
3:97036788:A:G	3	97036788	A	G	EPHA6	intron_variant	intron_variant	modifier	intron_variant	NA	NA	NA	NA	NA	NA	NA	NA	NA	intron_variant	3	97036788	A	G	1.45159e-05	1	172225	ADD	4.02049	1.36675	8.65323	2.48614	NA	UC
3:97037672:A:T	3	97037672	A	T	EPHA6	intron_variant	intron_variant	modifier	intron_variant	NA	NA	NA	NA	NA	NA	NA	NA	NA	intron_variant	3	97037672	A	T	1.45159e-05	1	172225	ADD	3.7293	1.35879	7.5327	2.21761	NA	UC
3:97037728:T:C	3	97037728	T	C	EPHA6	intron_variant	intron_variant	modifier	intron_variant	NA	NA	NA	NA	NA	NA	NA	NA	NA	intron_variant	3	97037728	T	C	1.45159e-05	1	172225	ADD	3.66444	1.33808	7.49982	2.20968	NA	UC
3:97041104:C:A	3	97041104	C	A	EPHA6	intron_variant	intron_variant	modifier	intron_variant	NA	NA	NA	NA	NA	NA	NA	NA	NA	intron_variant	3	97041104	C	A	2.03223e-05	1	172225	ADD	3.8452	1.34613	8.15954	2.3682	NA	UC
3:97041171:G:C	3	97041171	G	C	EPHA6	intron_variant	intron_variant	modifier	intron_variant	NA	NA	NA	NA	NA	NA	NA	NA	NA	intron_variant	3	97041171	G	C	6.09668e-05	1	172225	ADD	2.33451	0.903251	6.67997	2.01098	NA	UC
3:97041400:G:A	3	97041400	G	A	EPHA6	intron_variant	intron_variant	modifier	intron_variant	NA	NA	NA	NA	NA	NA	NA	NA	NA	intron_variant	3	97041400	G	A	2.90318e-05	1	172225	ADD	3.69218	1.31837	7.84318	2.29232	NA	CD
3:97043954:A:G	3	97043954	A	G	EPHA6	intron_variant	intron_variant	modifier	intron_variant	NA	NA	NA	NA	NA	NA	NA	NA	NA	intron_variant	3	97043954	A	G	0.000435477	1	172225	ADD	1.39204	0.461003	9.11794	2.59668	NA	UC
3:97044082:A:G	3	97044082	A	G	EPHA6	intron_variant	intron_variant	modifier	intron_variant	NA	NA	NA	NA	NA	NA	NA	NA	NA	intron_variant	3	97044082	A	G	1.45159e-05	1	172225	ADD	3.41749	1.31829	6.72032	2.02081	NA	UC
3:97044158:T:C	3	97044158	T	C	EPHA6	intron_variant	intron_variant	modifier	intron_variant	NA	NA	NA	NA	NA	NA	NA	NA	NA	intron_variant	3	97044158	T	C	0.000435477	1	172225	ADD	1.39204	0.461003	9.11794	2.59668	NA	UC
3:97045265:T:G	3	97045265	T	G	EPHA6	intron_variant	intron_variant	modifier	intron_variant	NA	NA	NA	NA	NA	NA	NA	NA	NA	intron_variant	3	97045265	T	G	1.45159e-05	1	172225	ADD	4.42212	1.41457	9.7726	2.7517	NA	CD
3:97045734:T:C	3	97045734	T	C	EPHA6	intron_variant	intron_variant	modifier	intron_variant	NA	NA	NA	NA	NA	NA	NA	NA	NA	intron_variant	3	97045734	T	C	8.70954e-06	1	172225	ADD	3.67222	1.3802	7.07901	2.10795	NA	UC
3:97047055:T:C	3	97047055	T	C	EPHA6	intron_variant	intron_variant	modifier	intron_variant	NA	NA	NA	NA	NA	NA	NA	NA	NA	intron_variant	3	97047055	T	C	2.03223e-05	1	172225	ADD	3.59519	1.31587	7.46485	2.20124	NA	CD
3:97047176:G:T	3	97047176	G	T	EPHA6	intron_variant	intron_variant	modifier	intron_variant	NA	NA	NA	NA	NA	NA	NA	NA	NA	intron_variant	3	97047176	G	T	1.45159e-05	1	172225	ADD	3.92256	1.41795	7.6527	2.24651	NA	CD
3:97047581:A:G	3	97047581	A	G	EPHA6	intron_variant	intron_variant	modifier	intron_variant	NA	NA	NA	NA	NA	NA	NA	NA	NA	intron_variant	3	97047581	A	G	8.70954e-06	1	172225	ADD	4.94294	1.4985	10.8807	3.01247	NA	UC
3:97047581:A:G	3	97047581	A	G	EPHA6	intron_variant	intron_variant	modifier	intron_variant	NA	NA	NA	NA	NA	NA	NA	NA	NA	intron_variant	3	97047581	A	G	8.70954e-06	1	172225	ADD	4.70917	1.49598	9.90917	2.78395	NA	CD
3:97048199:A:G	3	97048199	A	G	EPHA6	intron_variant	intron_variant	modifier	intron_variant	NA	NA	NA	NA	NA	NA	NA	NA	NA	intron_variant	3	97048199	A	G	3.1935e-05	1	172225	ADD	3.04705	0.989348	9.48549	2.68381	NA	UC
3:97050198:ATGG:A	3	97050198	ATGG	A	EPHA6	intron_variant	intron_variant	modifier	intron_variant	NA	NA	NA	NA	NA	NA	NA	NA	NA	intron_variant	3	97050198	ATGG	A	8.70954e-06	1	172225	ADD	4.01581	1.51723	7.00555	2.09014	NA	CD
3:97051360:C:T	3	97051360	C	T	EPHA6	intron_variant	intron_variant	modifier	intron_variant	NA	NA	NA	NA	NA	NA	NA	NA	NA	intron_variant	3	97051360	C	T	1.74191e-05	1	172225	ADD	3.46786	1.30902	7.01826	2.09322	NA	UC
3:97051466:C:G	3	97051466	C	G	EPHA6	intron_variant	intron_variant	modifier	intron_variant	NA	NA	NA	NA	NA	NA	NA	NA	NA	intron_variant	3	97051466	C	G	3.48381e-05	1	172225	ADD	2.55578	0.952878	7.19406	2.13581	NA	UC
3:97052571:T:C	3	97052571	T	C	EPHA6	intron_variant	intron_variant	modifier	intron_variant	NA	NA	NA	NA	NA	NA	NA	NA	NA	intron_variant	3	97052571	T	C	1.45159e-05	1	172225	ADD	3.47173	1.32155	6.90122	2.06481	NA	CD
3:97052708:A:G	3	97052708	A	G	EPHA6	intron_variant	intron_variant	modifier	intron_variant	NA	NA	NA	NA	NA	NA	NA	NA	NA	intron_variant	3	97052708	A	G	1.16127e-05	1	172225	ADD	4.43706	1.43655	9.53996	2.6967	NA	CD
3:97052815:C:T	3	97052815	C	T	EPHA6	intron_variant	intron_variant	modifier	intron_variant	NA	NA	NA	NA	NA	NA	NA	NA	NA	intron_variant	3	97052815	C	T	0.000420961	1	172225	ADD	1.42091	0.462963	9.41977	2.66825	NA	UC
3:97052835:A:G	3	97052835	A	G	EPHA6	intron_variant	intron_variant	modifier	intron_variant	NA	NA	NA	NA	NA	NA	NA	NA	NA	intron_variant	3	97052835	A	G	1.45159e-05	1	172225	ADD	3.90062	1.36376	8.1807	2.37327	NA	UC
3:97053093:C:A	3	97053093	C	A	EPHA6	intron_variant	intron_variant	modifier	intron_variant	NA	NA	NA	NA	NA	NA	NA	NA	NA	intron_variant	3	97053093	C	A	1.45159e-05	1	172225	ADD	4.01897	1.39407	8.31114	2.40447	NA	CD
3:97053093:C:A	3	97053093	C	A	EPHA6	intron_variant	intron_variant	modifier	intron_variant	NA	NA	NA	NA	NA	NA	NA	NA	NA	intron_variant	3	97053093	C	A	1.45159e-05	1	172225	ADD	3.85869	1.37288	7.89972	2.3059	NA	UC
3:97054163:AACAC:A	3	97054163	AACAC	A	EPHA6	intron_variant	intron_variant	modifier	intron_variant	NA	NA	NA	NA	NA	NA	NA	NA	NA	intron_variant	3	97054163	AACAC	A	0.0160807	1	172225	ADD	-0.6638	0.207447	10.239	2.8617	NA	CD
3:97054809:G:A	3	97054809	G	A	EPHA6	intron_variant	intron_variant	modifier	intron_variant	NA	NA	NA	NA	NA	NA	NA	NA	NA	intron_variant	3	97054809	G	A	2.61286e-05	1	172225	ADD	3.47751	1.30451	7.10624	2.11455	NA	CD
3:97055381:G:A	3	97055381	G	A	EPHA6	intron_variant	intron_variant	modifier	intron_variant	NA	NA	NA	NA	NA	NA	NA	NA	NA	intron_variant	3	97055381	G	A	9.58049e-05	1	172225	ADD	2.44882	0.76719	10.1885	2.84979	NA	UC
3:97055533:G:A	3	97055533	G	A	EPHA6	intron_variant	intron_variant	modifier	intron_variant	NA	NA	NA	NA	NA	NA	NA	NA	NA	intron_variant	3	97055533	G	A	0.000420961	1	172225	ADD	1.42091	0.462963	9.41977	2.66825	NA	UC
3:97059213:A:G	3	97059213	A	G	EPHA6	intron_variant	intron_variant	modifier	intron_variant	NA	NA	NA	NA	NA	NA	NA	NA	NA	intron_variant	3	97059213	A	G	8.70954e-06	1	172225	ADD	5.11471	1.50313	11.5784	3.17572	NA	CD
3:97059677:A:G	3	97059677	A	G	EPHA6	intron_variant	intron_variant	modifier	intron_variant	NA	NA	NA	NA	NA	NA	NA	NA	NA	intron_variant	3	97059677	A	G	1.16127e-05	1	172225	ADD	3.70443	1.3899	7.1036	2.11391	NA	UC
3:97061088:A:G	3	97061088	A	G	EPHA6	intron_variant	intron_variant	modifier	intron_variant	NA	NA	NA	NA	NA	NA	NA	NA	NA	intron_variant	3	97061088	A	G	2.03223e-05	1	172225	ADD	3.61711	1.32232	7.48252	2.20551	NA	CD
3:97061121:G:T	3	97061121	G	T	EPHA6	intron_variant	intron_variant	modifier	intron_variant	NA	NA	NA	NA	NA	NA	NA	NA	NA	intron_variant	3	97061121	G	T	1.45159e-05	1	172225	ADD	3.89309	1.37536	8.01231	2.33292	NA	CD
3:97061121:G:T	3	97061121	G	T	EPHA6	intron_variant	intron_variant	modifier	intron_variant	NA	NA	NA	NA	NA	NA	NA	NA	NA	intron_variant	3	97061121	G	T	1.45159e-05	1	172225	ADD	4.00157	1.37152	8.51247	2.45257	NA	UC
3:97061551:G:A	3	97061551	G	A	EPHA6	intron_variant	intron_variant	modifier	intron_variant	NA	NA	NA	NA	NA	NA	NA	NA	NA	intron_variant	3	97061551	G	A	1.45159e-05	1	172225	ADD	3.8514	1.35284	8.10482	2.35509	NA	UC
3:97061719:A:G	3	97061719	A	G	EPHA6	intron_variant	intron_variant	modifier	intron_variant	NA	NA	NA	NA	NA	NA	NA	NA	NA	intron_variant	3	97061719	A	G	2.90318e-05	1	172225	ADD	3.64954	1.31027	7.75814	2.27188	NA	CD
3:97064429:T:G	3	97064429	T	G	EPHA6	intron_variant	intron_variant	modifier	intron_variant	NA	NA	NA	NA	NA	NA	NA	NA	NA	intron_variant	3	97064429	T	G	8.70954e-06	1	172225	ADD	5.29923	1.27262	17.3392	4.5049	NA	CD
3:97064685:T:C	3	97064685	T	C	EPHA6	intron_variant	intron_variant	modifier	intron_variant	NA	NA	NA	NA	NA	NA	NA	NA	NA	intron_variant	3	97064685	T	C	2.90318e-05	1	172225	ADD	3.45706	1.29497	7.12676	2.11952	NA	CD
3:97064880:T:G	3	97064880	T	G	EPHA6	intron_variant	intron_variant	modifier	intron_variant	NA	NA	NA	NA	NA	NA	NA	NA	NA	intron_variant	3	97064880	T	G	9.58049e-05	1	172225	ADD	2.59995	0.922196	7.94845	2.3176	NA	CD
3:97065835:C:G	3	97065835	C	G	EPHA6	intron_variant	intron_variant	modifier	intron_variant	NA	NA	NA	NA	NA	NA	NA	NA	NA	intron_variant	3	97065835	C	G	1.45159e-05	1	172225	ADD	3.47173	1.32155	6.90122	2.06481	NA	CD
3:97066382:G:A	3	97066382	G	A	EPHA6	intron_variant	intron_variant	modifier	intron_variant	NA	NA	NA	NA	NA	NA	NA	NA	NA	intron_variant	3	97066382	G	A	0.00318769	1	172225	ADD	0.643743	0.222818	8.34685	2.41301	NA	UC
3:97066515:A:G	3	97066515	A	G	EPHA6	intron_variant	intron_variant	modifier	intron_variant	NA	NA	NA	NA	NA	NA	NA	NA	NA	intron_variant	3	97066515	A	G	8.70954e-06	1	172225	ADD	3.998	1.43748	7.73542	2.26642	NA	UC
3:97067532:A:G	3	97067532	A	G	EPHA6	intron_variant	intron_variant	modifier	intron_variant	NA	NA	NA	NA	NA	NA	NA	NA	NA	intron_variant	3	97067532	A	G	9.29017e-05	1	172225	ADD	2.57832	0.923342	7.79739	2.28132	NA	CD
3:97067532:A:G	3	97067532	A	G	EPHA6	intron_variant	intron_variant	modifier	intron_variant	NA	NA	NA	NA	NA	NA	NA	NA	NA	intron_variant	3	97067532	A	G	9.29017e-05	1	172225	ADD	2.02183	0.745211	7.36092	2.17616	NA	UC
3:97067741:A:G	3	97067741	A	G	EPHA6	intron_variant	intron_variant	modifier	intron_variant	NA	NA	NA	NA	NA	NA	NA	NA	NA	intron_variant	3	97067741	A	G	1.74191e-05	1	172225	ADD	3.33879	1.29071	6.69141	2.01377	NA	UC
3:97068475:T:A	3	97068475	T	A	EPHA6	intron_variant	intron_variant	modifier	intron_variant	NA	NA	NA	NA	NA	NA	NA	NA	NA	intron_variant	3	97068475	T	A	2.32254e-05	1	172225	ADD	3.42421	1.30146	6.92239	2.06995	NA	UC
3:97070631:C:T	3	97070631	C	T	EPHA6	intron_variant	intron_variant	modifier	intron_variant	NA	NA	NA	NA	NA	NA	NA	NA	NA	intron_variant	3	97070631	C	T	1.16127e-05	1	172225	ADD	3.51842	1.34096	6.88439	2.06072	NA	UC
3:97071121:T:C	3	97071121	T	C	EPHA6	intron_variant	intron_variant	modifier	intron_variant	NA	NA	NA	NA	NA	NA	NA	NA	NA	intron_variant	3	97071121	T	C	1.74191e-05	1	172225	ADD	4.17823	1.38072	9.15737	2.60604	NA	UC
3:97072826:C:A	3	97072826	C	A	EPHA6	intron_variant	intron_variant	modifier	intron_variant	NA	NA	NA	NA	NA	NA	NA	NA	NA	intron_variant	3	97072826	C	A	1.74191e-05	1	172225	ADD	4.2013	1.3885	9.15542	2.60558	NA	UC
3:97073029:A:G	3	97073029	A	G	EPHA6	intron_variant	intron_variant	modifier	intron_variant	NA	NA	NA	NA	NA	NA	NA	NA	NA	intron_variant	3	97073029	A	G	2.03223e-05	1	172225	ADD	3.43531	1.33364	6.63519	2.00007	NA	UC
3:97074821:G:A	3	97074821	G	A	EPHA6	intron_variant	intron_variant	modifier	intron_variant	NA	NA	NA	NA	NA	NA	NA	NA	NA	intron_variant	3	97074821	G	A	1.45159e-05	1	172225	ADD	3.67087	1.35923	7.29372	2.15992	NA	CD
3:97075340:AG:A	3	97075340	AG	A	EPHA6	intron_variant	intron_variant	modifier	intron_variant	NA	NA	NA	NA	NA	NA	NA	NA	NA	intron_variant	3	97075340	AG	A	1.45159e-05	1	172225	ADD	4.4191	1.41909	9.69729	2.73391	NA	CD
3:97080369:A:G	3	97080369	A	G	EPHA6	intron_variant	intron_variant	modifier	intron_variant	NA	NA	NA	NA	NA	NA	NA	NA	NA	intron_variant	3	97080369	A	G	1.16127e-05	1	172225	ADD	3.95687	1.45323	7.41372	2.18891	NA	UC
3:97081956:T:A	3	97081956	T	A	EPHA6	intron_variant	intron_variant	modifier	intron_variant	NA	NA	NA	NA	NA	NA	NA	NA	NA	intron_variant	3	97081956	T	A	0.000554514	1	172223	ADD	1.50533	0.540158	7.76643	2.27387	NA	CD
3:97082739:A:AG	3	97082739	A	AG	EPHA6	intron_variant	intron_variant	modifier	intron_variant	NA	NA	NA	NA	NA	NA	NA	NA	NA	intron_variant	3	97082739	A	AG	9.29017e-05	1	172225	ADD	2.44801	0.904479	7.32537	2.16757	NA	CD
3:97082771:A:G	3	97082771	A	G	EPHA6	intron_variant	intron_variant	modifier	intron_variant	NA	NA	NA	NA	NA	NA	NA	NA	NA	intron_variant	3	97082771	A	G	8.70954e-06	1	172225	ADD	3.85476	1.38655	7.72897	2.26487	NA	UC
3:97083099:A:G	3	97083099	A	G	EPHA6	intron_variant	intron_variant	modifier	intron_variant	NA	NA	NA	NA	NA	NA	NA	NA	NA	intron_variant	3	97083099	A	G	1.45159e-05	1	172225	ADD	3.41325	1.30005	6.89311	2.06284	NA	CD
3:97083419:T:C	3	97083419	T	C	EPHA6	intron_variant	intron_variant	modifier	intron_variant	NA	NA	NA	NA	NA	NA	NA	NA	NA	intron_variant	3	97083419	T	C	2.61286e-05	1	172225	ADD	3.29283	1.26957	6.72702	2.02245	NA	UC
3:97083597:G:C	3	97083597	G	C	EPHA6	intron_variant	intron_variant	modifier	intron_variant	NA	NA	NA	NA	NA	NA	NA	NA	NA	intron_variant	3	97083597	G	C	1.45159e-05	1	172225	ADD	4.09301	1.44951	7.97336	2.32357	NA	CD
3:97084138:GCACA:G	3	97084138	GCACA	G	EPHA6	intron_variant	intron_variant	modifier	intron_variant	NA	NA	NA	NA	NA	NA	NA	NA	NA	intron_variant	3	97084138	GCACA	G	2.03223e-05	1	172225	ADD	3.35828	1.28694	6.80953	2.04252	NA	UC
3:97084200:T:C	3	97084200	T	C	EPHA6	intron_variant	intron_variant	modifier	intron_variant	NA	NA	NA	NA	NA	NA	NA	NA	NA	intron_variant	3	97084200	T	C	2.03223e-05	1	172225	ADD	4.09889	1.37005	8.95078	2.55697	NA	CD
3:97084974:A:G	3	97084974	A	G	EPHA6	intron_variant	intron_variant	modifier	intron_variant	NA	NA	NA	NA	NA	NA	NA	NA	NA	intron_variant	3	97084974	A	G	2.61286e-05	1	172225	ADD	3.4351	1.29149	7.0745	2.10686	NA	CD
3:97085241:T:C	3	97085241	T	C	EPHA6	intron_variant	intron_variant	modifier	intron_variant	NA	NA	NA	NA	NA	NA	NA	NA	NA	intron_variant	3	97085241	T	C	1.74191e-05	1	172225	ADD	4.1285	1.38392	8.8995	2.54478	NA	CD
3:97085253:A:T	3	97085253	A	T	EPHA6	intron_variant	intron_variant	modifier	intron_variant	NA	NA	NA	NA	NA	NA	NA	NA	NA	intron_variant	3	97085253	A	T	1.45159e-05	1	172225	ADD	4.33524	1.40429	9.53047	2.69446	NA	CD
3:97085711:T:A	3	97085711	T	A	EPHA6	intron_variant	intron_variant	modifier	intron_variant	NA	NA	NA	NA	NA	NA	NA	NA	NA	intron_variant	3	97085711	T	A	0.034873	1	172225	ADD	0.303811	0.105196	8.34084	2.41157	NA	CD
3:97087735:T:C	3	97087735	T	C	EPHA6	intron_variant	intron_variant	modifier	intron_variant	NA	NA	NA	NA	NA	NA	NA	NA	NA	intron_variant	3	97087735	T	C	8.70954e-06	1	172225	ADD	4.08084	1.46253	7.78553	2.27847	NA	CD
3:97088655:G:C	3	97088655	G	C	EPHA6	intron_variant	intron_variant	modifier	intron_variant	NA	NA	NA	NA	NA	NA	NA	NA	NA	intron_variant	3	97088655	G	C	8.70954e-06	1	172225	ADD	4.09515	1.41995	8.31752	2.406	NA	UC
3:97089602:C:T	3	97089602	C	T	EPHA6	intron_variant	intron_variant	modifier	intron_variant	NA	NA	NA	NA	NA	NA	NA	NA	NA	intron_variant	3	97089602	C	T	4.9354e-05	1	172225	ADD	2.9853	0.970839	9.45541	2.67669	NA	UC
3:97089968:G:A	3	97089968	G	A	EPHA6	intron_variant	intron_variant	modifier	intron_variant	NA	NA	NA	NA	NA	NA	NA	NA	NA	intron_variant	3	97089968	G	A	1.45159e-05	1	172225	ADD	4.02109	1.36925	8.6243	2.47924	NA	UC
3:97089968:G:A	3	97089968	G	A	EPHA6	intron_variant	intron_variant	modifier	intron_variant	NA	NA	NA	NA	NA	NA	NA	NA	NA	intron_variant	3	97089968	G	A	1.45159e-05	1	172225	ADD	4.62927	1.43905	10.3483	2.88742	NA	CD
3:97090915:G:A	3	97090915	G	A	EPHA6	intron_variant	intron_variant	modifier	intron_variant	NA	NA	NA	NA	NA	NA	NA	NA	NA	intron_variant	3	97090915	G	A	3.1935e-05	1	172225	ADD	3.37061	1.29376	6.78753	2.03717	NA	CD
3:97090955:C:T	3	97090955	C	T	EPHA6	intron_variant	intron_variant	modifier	intron_variant	NA	NA	NA	NA	NA	NA	NA	NA	NA	intron_variant	3	97090955	C	T	8.70954e-06	1	172225	ADD	4.264	1.47946	8.30668	2.40341	NA	CD
3:97092820:T:C	3	97092820	T	C	EPHA6	intron_variant	intron_variant	modifier	intron_variant	NA	NA	NA	NA	NA	NA	NA	NA	NA	intron_variant	3	97092820	T	C	1.45159e-05	1	172225	ADD	3.58863	1.3454	7.11461	2.11657	NA	UC
3:97093717:A:G	3	97093717	A	G	EPHA6	intron_variant	intron_variant	modifier	intron_variant	NA	NA	NA	NA	NA	NA	NA	NA	NA	intron_variant	3	97093717	A	G	1.16127e-05	1	172225	ADD	4.2227	1.40244	9.06596	2.58434	NA	UC
3:97093828:A:G	3	97093828	A	G	EPHA6	intron_variant	intron_variant	modifier	intron_variant	NA	NA	NA	NA	NA	NA	NA	NA	NA	intron_variant	3	97093828	A	G	1.45159e-05	1	172225	ADD	4.07385	1.40149	8.44949	2.43753	NA	CD
3:97093850:C:T	3	97093850	C	T	EPHA6	intron_variant	intron_variant	modifier	intron_variant	NA	NA	NA	NA	NA	NA	NA	NA	NA	intron_variant	3	97093850	C	T	1.16127e-05	1	172225	ADD	4.83339	1.47322	10.7638	2.98505	NA	UC
3:97093901:T:C	3	97093901	T	C	EPHA6	intron_variant	intron_variant	modifier	intron_variant	NA	NA	NA	NA	NA	NA	NA	NA	NA	intron_variant	3	97093901	T	C	6.96763e-05	1	172225	ADD	2.19023	0.844893	6.72011	2.02076	NA	UC
3:97094298:C:A	3	97094298	C	A	EPHA6	intron_variant	intron_variant	modifier	intron_variant	NA	NA	NA	NA	NA	NA	NA	NA	NA	intron_variant	3	97094298	C	A	1.74191e-05	1	172225	ADD	3.66924	1.35814	7.29898	2.16119	NA	UC
3:97095516:T:C	3	97095516	T	C	EPHA6	intron_variant	intron_variant	modifier	intron_variant	NA	NA	NA	NA	NA	NA	NA	NA	NA	intron_variant	3	97095516	T	C	8.70954e-06	1	172225	ADD	4.37596	1.46598	8.91025	2.54733	NA	UC
3:97095516:T:C	3	97095516	T	C	EPHA6	intron_variant	intron_variant	modifier	intron_variant	NA	NA	NA	NA	NA	NA	NA	NA	NA	intron_variant	3	97095516	T	C	8.70954e-06	1	172225	ADD	5.32123	1.55911	11.6485	3.19211	NA	CD
3:97096213:G:A	3	97096213	G	A	EPHA6	intron_variant	intron_variant	modifier	intron_variant	NA	NA	NA	NA	NA	NA	NA	NA	NA	intron_variant	3	97096213	G	A	1.16127e-05	1	172225	ADD	3.69078	1.35893	7.37637	2.17989	NA	UC
3:97100214:C:G	3	97100214	C	G	EPHA6	intron_variant	intron_variant	modifier	intron_variant	NA	NA	NA	NA	NA	NA	NA	NA	NA	intron_variant	3	97100214	C	G	8.70954e-06	1	172225	ADD	4.36033	1.46072	8.91052	2.5474	NA	UC
3:97106096:T:A	3	97106096	T	A	EPHA6	intron_variant	intron_variant	modifier	intron_variant	NA	NA	NA	NA	NA	NA	NA	NA	NA	intron_variant	3	97106096	T	A	1.16127e-05	1	172225	ADD	3.70417	1.35994	7.41899	2.19018	NA	UC
3:97107173:A:G	3	97107173	A	G	EPHA6	intron_variant	intron_variant	modifier	intron_variant	NA	NA	NA	NA	NA	NA	NA	NA	NA	intron_variant	3	97107173	A	G	2.03223e-05	1	172225	ADD	3.69882	1.3718	7.27015	2.15422	NA	CD
3:97107315:C:T	3	97107315	C	T	EPHA6	intron_variant	intron_variant	modifier	intron_variant	NA	NA	NA	NA	NA	NA	NA	NA	NA	intron_variant	3	97107315	C	T	8.70954e-06	1	172225	ADD	4.2191	1.43577	8.63519	2.48184	NA	UC
3:97107387:T:G	3	97107387	T	G	EPHA6	intron_variant	intron_variant	modifier	intron_variant	NA	NA	NA	NA	NA	NA	NA	NA	NA	intron_variant	3	97107387	T	G	8.1289e-05	1	172225	ADD	2.01946	0.775883	6.77453	2.03401	NA	CD
3:97107853:C:A	3	97107853	C	A	EPHA6	intron_variant	intron_variant	modifier	intron_variant	NA	NA	NA	NA	NA	NA	NA	NA	NA	intron_variant	3	97107853	C	A	2.03223e-05	1	172225	ADD	3.81062	1.33552	8.14118	2.3638	NA	UC
3:97108057:G:A	3	97108057	G	A	EPHA6	intron_variant	intron_variant	modifier	intron_variant	NA	NA	NA	NA	NA	NA	NA	NA	NA	intron_variant	3	97108057	G	A	1.16127e-05	1	172225	ADD	4.16904	1.40022	8.86503	2.53658	NA	CD
3:97108137:A:C	3	97108137	A	C	EPHA6	intron_variant	intron_variant	modifier	intron_variant	NA	NA	NA	NA	NA	NA	NA	NA	NA	intron_variant	3	97108137	A	C	2.90318e-05	1	172225	ADD	3.8878	1.33924	8.42741	2.43226	NA	CD
3:97108728:C:T	3	97108728	C	T	EPHA6	intron_variant	intron_variant	modifier	intron_variant	NA	NA	NA	NA	NA	NA	NA	NA	NA	intron_variant	3	97108728	C	T	1.74191e-05	1	172225	ADD	4.40231	1.40503	9.81721	2.76224	NA	CD
3:97108848:A:G	3	97108848	A	G	EPHA6	intron_variant	intron_variant	modifier	intron_variant	NA	NA	NA	NA	NA	NA	NA	NA	NA	intron_variant	3	97108848	A	G	1.16127e-05	1	172225	ADD	3.69613	1.34329	7.57103	2.22684	NA	UC
3:97111226:T:A	3	97111226	T	A	EPHA6	intron_variant	intron_variant	modifier	intron_variant	NA	NA	NA	NA	NA	NA	NA	NA	NA	intron_variant	3	97111226	T	A	8.70954e-06	1	172225	ADD	3.76501	1.36717	7.58384	2.22993	NA	UC
3:97111636:G:A	3	97111636	G	A	EPHA6	intron_variant	intron_variant	modifier	intron_variant	NA	NA	NA	NA	NA	NA	NA	NA	NA	intron_variant	3	97111636	G	A	1.45159e-05	1	172225	ADD	4.2199	1.39705	9.12387	2.59809	NA	CD
3:97112258:G:T	3	97112258	G	T	EPHA6	intron_variant	intron_variant	modifier	intron_variant	NA	NA	NA	NA	NA	NA	NA	NA	NA	intron_variant	3	97112258	G	T	8.70954e-06	1	172225	ADD	3.97067	1.4179	7.84212	2.29207	NA	UC
3:97113836:T:C	3	97113836	T	C	EPHA6	intron_variant	intron_variant	modifier	intron_variant	NA	NA	NA	NA	NA	NA	NA	NA	NA	intron_variant	3	97113836	T	C	1.45159e-05	1	172225	ADD	3.37453	1.30756	6.66049	2.00624	NA	UC
3:97114597:T:A	3	97114597	T	A	EPHA6	intron_variant	intron_variant	modifier	intron_variant	NA	NA	NA	NA	NA	NA	NA	NA	NA	intron_variant	3	97114597	T	A	2.32254e-05	1	172225	ADD	3.55031	1.31685	7.26882	2.1539	NA	CD
3:97115157:T:C	3	97115157	T	C	EPHA6	intron_variant	intron_variant	modifier	intron_variant	NA	NA	NA	NA	NA	NA	NA	NA	NA	intron_variant	3	97115157	T	C	6.96763e-05	1	172225	ADD	2.36471	0.895057	6.97998	2.08393	NA	UC
3:97115357:A:G	3	97115357	A	G	EPHA6	intron_variant	intron_variant	modifier	intron_variant	NA	NA	NA	NA	NA	NA	NA	NA	NA	intron_variant	3	97115357	A	G	2.03223e-05	1	172225	ADD	3.36298	1.30208	6.67072	2.00873	NA	CD
3:97115895:C:T	3	97115895	C	T	EPHA6	intron_variant	intron_variant	modifier	intron_variant	NA	NA	NA	NA	NA	NA	NA	NA	NA	intron_variant	3	97115895	C	T	1.45159e-05	1	172225	ADD	4.17719	1.41296	8.74002	2.50682	NA	CD
3:97119835:C:T	3	97119835	C	T	EPHA6	intron_variant	intron_variant	modifier	intron_variant	NA	NA	NA	NA	NA	NA	NA	NA	NA	intron_variant	3	97119835	C	T	2.03223e-05	1	172225	ADD	3.80074	1.34575	7.9764	2.3243	NA	CD
3:97120365:GT:G	3	97120365	GT	G	EPHA6	intron_variant	intron_variant	modifier	intron_variant	NA	NA	NA	NA	NA	NA	NA	NA	NA	intron_variant	3	97120365	GT	G	8.70954e-06	1	172225	ADD	3.91648	1.38782	7.96392	2.32131	NA	UC
3:97120415:A:T	3	97120415	A	T	EPHA6	intron_variant	intron_variant	modifier	intron_variant	NA	NA	NA	NA	NA	NA	NA	NA	NA	intron_variant	3	97120415	A	T	1.16127e-05	1	172225	ADD	4.11054	1.39324	8.70454	2.49837	NA	UC
3:97120913:C:G	3	97120913	C	G	EPHA6	intron_variant	intron_variant	modifier	intron_variant	NA	NA	NA	NA	NA	NA	NA	NA	NA	intron_variant	3	97120913	C	G	8.70954e-06	1	172225	ADD	4.78236	1.82773	6.84637	2.05148	NA	CD
3:97121283:G:A	3	97121283	G	A	EPHA6	intron_variant	intron_variant	modifier	intron_variant	NA	NA	NA	NA	NA	NA	NA	NA	NA	intron_variant	3	97121283	G	A	6.67731e-05	1	172225	ADD	3.18126	0.971996	10.712	2.97288	NA	CD
3:97122456:TC:T	3	97122456	TC	T	EPHA6	intron_variant	intron_variant	modifier	intron_variant	NA	NA	NA	NA	NA	NA	NA	NA	NA	intron_variant	3	97122456	TC	T	1.16127e-05	1	172225	ADD	3.94438	1.4283	7.6264	2.24018	NA	UC
3:97123109:A:G	3	97123109	A	G	EPHA6	intron_variant	intron_variant	modifier	intron_variant	NA	NA	NA	NA	NA	NA	NA	NA	NA	intron_variant	3	97123109	A	G	1.45159e-05	1	172225	ADD	3.77835	1.35007	7.83238	2.28973	NA	UC
3:97123418:G:C	3	97123418	G	C	EPHA6	intron_variant	intron_variant	modifier	intron_variant	NA	NA	NA	NA	NA	NA	NA	NA	NA	intron_variant	3	97123418	G	C	1.16127e-05	1	172225	ADD	4.77634	1.47981	10.4179	2.90378	NA	CD
3:97123481:C:G	3	97123481	C	G	EPHA6	intron_variant	intron_variant	modifier	intron_variant	NA	NA	NA	NA	NA	NA	NA	NA	NA	intron_variant	3	97123481	C	G	1.45159e-05	1	172225	ADD	3.47173	1.32155	6.90122	2.06481	NA	CD
3:97124869:G:T	3	97124869	G	T	EPHA6	intron_variant	intron_variant	modifier	intron_variant	NA	NA	NA	NA	NA	NA	NA	NA	NA	intron_variant	3	97124869	G	T	3.48381e-05	1	172225	ADD	3.48208	1.29104	7.27436	2.15524	NA	CD
3:97124987:T:G	3	97124987	T	G	EPHA6	intron_variant	intron_variant	modifier	intron_variant	NA	NA	NA	NA	NA	NA	NA	NA	NA	intron_variant	3	97124987	T	G	1.45159e-05	1	172225	ADD	3.62838	1.36467	7.06925	2.10558	NA	CD
3:97125035:CAT:C	3	97125035	CAT	C	EPHA6	intron_variant	intron_variant	modifier	intron_variant	NA	NA	NA	NA	NA	NA	NA	NA	NA	intron_variant	3	97125035	CAT	C	1.16127e-05	1	172225	ADD	5.46173	1.54456	12.504	3.39139	NA	CD
3:97125896:A:G	3	97125896	A	G	EPHA6	intron_variant	intron_variant	modifier	intron_variant	NA	NA	NA	NA	NA	NA	NA	NA	NA	intron_variant	3	97125896	A	G	8.70954e-06	1	172225	ADD	3.97671	1.40539	8.00666	2.33156	NA	UC
3:97126068:C:A	3	97126068	C	A	EPHA6	intron_variant	intron_variant	modifier	intron_variant	NA	NA	NA	NA	NA	NA	NA	NA	NA	intron_variant	3	97126068	C	A	2.32254e-05	1	172225	ADD	3.98688	1.35739	8.62699	2.47989	NA	CD
3:97126258:A:G	3	97126258	A	G	EPHA6	intron_variant	intron_variant	modifier	intron_variant	NA	NA	NA	NA	NA	NA	NA	NA	NA	intron_variant	3	97126258	A	G	5.22572e-05	1	172225	ADD	2.76986	0.954334	8.42395	2.43143	NA	CD
3:97126787:A:G	3	97126787	A	G	EPHA6	intron_variant	intron_variant	modifier	intron_variant	NA	NA	NA	NA	NA	NA	NA	NA	NA	intron_variant	3	97126787	A	G	3.1935e-05	1	172225	ADD	3.44535	1.28879	7.14669	2.12434	NA	CD
3:97130242:C:CT	3	97130242	C	CT	EPHA6	intron_variant	intron_variant	modifier	intron_variant	NA	NA	NA	NA	NA	NA	NA	NA	NA	intron_variant	3	97130242	C	CT	3.77413e-05	1	172225	ADD	3.17538	0.988435	10.3204	2.88084	NA	CD
3:97130246:A:AGTATTCTGGGTACCC	3	97130246	A	AGTATTCTGGGTACCC	EPHA6	intron_variant	intron_variant	modifier	intron_variant	NA	NA	NA	NA	NA	NA	NA	NA	NA	intron_variant	3	97130246	A	AGTATTCTGGGTACCC	3.77413e-05	1	172225	ADD	3.17538	0.988435	10.3204	2.88084	NA	CD
3:97130340:C:G	3	97130340	C	G	EPHA6	intron_variant	intron_variant	modifier	intron_variant	NA	NA	NA	NA	NA	NA	NA	NA	NA	intron_variant	3	97130340	C	G	1.74191e-05	1	172225	ADD	4.59902	1.43308	10.2989	2.87579	NA	CD
3:97131054:A:G	3	97131054	A	G	EPHA6	intron_variant	intron_variant	modifier	intron_variant	NA	NA	NA	NA	NA	NA	NA	NA	NA	intron_variant	3	97131054	A	G	1.45159e-05	1	172225	ADD	3.81383	1.37526	7.69051	2.25561	NA	CD
3:97131427:C:G	3	97131427	C	G	EPHA6	intron_variant	intron_variant	modifier	intron_variant	NA	NA	NA	NA	NA	NA	NA	NA	NA	intron_variant	3	97131427	C	G	8.70954e-06	1	172225	ADD	4.34128	1.62134	7.16948	2.12986	NA	CD
3:97131476:C:A	3	97131476	C	A	EPHA6	intron_variant	intron_variant	modifier	intron_variant	NA	NA	NA	NA	NA	NA	NA	NA	NA	intron_variant	3	97131476	C	A	1.45159e-05	1	172225	ADD	3.66979	1.35633	7.3207	2.16644	NA	CD
3:97132372:A:C	3	97132372	A	C	EPHA6	intron_variant	intron_variant	modifier	intron_variant	NA	NA	NA	NA	NA	NA	NA	NA	NA	intron_variant	3	97132372	A	C	0.000107418	1	172225	ADD	2.42915	0.768015	10.0039	2.80629	NA	UC
3:97132387:A:G	3	97132387	A	G	EPHA6	intron_variant	intron_variant	modifier	intron_variant	NA	NA	NA	NA	NA	NA	NA	NA	NA	intron_variant	3	97132387	A	G	8.70954e-06	1	172225	ADD	4.0135	1.42811	7.89815	2.30552	NA	CD
3:97132709:G:C	3	97132709	G	C	EPHA6	intron_variant	intron_variant	modifier	intron_variant	NA	NA	NA	NA	NA	NA	NA	NA	NA	intron_variant	3	97132709	G	C	1.74191e-05	1	172225	ADD	3.35366	1.30185	6.63615	2.00031	NA	UC
3:97132748:C:T	3	97132748	C	T	EPHA6	intron_variant	intron_variant	modifier	intron_variant	NA	NA	NA	NA	NA	NA	NA	NA	NA	intron_variant	3	97132748	C	T	1.74191e-05	1	172225	ADD	3.55378	1.34214	7.01111	2.09149	NA	UC
3:97132846:T:C	3	97132846	T	C	EPHA6	intron_variant	intron_variant	modifier	intron_variant	NA	NA	NA	NA	NA	NA	NA	NA	NA	intron_variant	3	97132846	T	C	8.70954e-06	1	172225	ADD	5.09386	1.51646	11.2833	3.10674	NA	CD
3:97133108:G:T	3	97133108	G	T	EPHA6	intron_variant	intron_variant	modifier	intron_variant	NA	NA	NA	NA	NA	NA	NA	NA	NA	intron_variant	3	97133108	G	T	2.03223e-05	1	172225	ADD	3.61977	1.32982	7.40922	2.18782	NA	CD
3:97133777:T:C	3	97133777	T	C	EPHA6	intron_variant	intron_variant	modifier	intron_variant	NA	NA	NA	NA	NA	NA	NA	NA	NA	intron_variant	3	97133777	T	C	4.06445e-05	1	172225	ADD	3.01594	0.9855	9.36552	2.6554	NA	UC
3:97134612:T:C	3	97134612	T	C	EPHA6	intron_variant	intron_variant	modifier	intron_variant	NA	NA	NA	NA	NA	NA	NA	NA	NA	intron_variant	3	97134612	T	C	1.16127e-05	1	172225	ADD	4.21594	1.43076	8.68273	2.49317	NA	CD
3:97134738:T:TA	3	97134738	T	TA	EPHA6	intron_variant	intron_variant	modifier	intron_variant	NA	NA	NA	NA	NA	NA	NA	NA	NA	intron_variant	3	97134738	T	TA	8.70954e-06	1	172225	ADD	4.93115	1.49791	10.8374	3.00231	NA	UC
3:97135957:AT:A	3	97135957	AT	A	EPHA6	intron_variant	intron_variant	modifier	intron_variant	NA	NA	NA	NA	NA	NA	NA	NA	NA	intron_variant	3	97135957	AT	A	2.03223e-05	1	172225	ADD	3.49551	1.31169	7.10163	2.11343	NA	UC
3:97135957:AT:A	3	97135957	AT	A	EPHA6	intron_variant	intron_variant	modifier	intron_variant	NA	NA	NA	NA	NA	NA	NA	NA	NA	intron_variant	3	97135957	AT	A	2.03223e-05	1	172225	ADD	4.09521	1.39803	8.58071	2.46885	NA	CD
3:97136958:TA:T	3	97136958	TA	T	EPHA6	intron_variant	intron_variant	modifier	intron_variant	NA	NA	NA	NA	NA	NA	NA	NA	NA	intron_variant	3	97136958	TA	T	1.16127e-05	1	172225	ADD	4.27753	1.56629	7.45835	2.19968	NA	CD
3:97137331:T:C	3	97137331	T	C	EPHA6	intron_variant	intron_variant	modifier	intron_variant	NA	NA	NA	NA	NA	NA	NA	NA	NA	intron_variant	3	97137331	T	C	2.90318e-05	1	172225	ADD	4.07338	1.37755	8.74363	2.50768	NA	CD
3:97145265:C:T	3	97145265	C	T	EPHA6	intron_variant	intron_variant	modifier	intron_variant	NA	NA	NA	NA	NA	NA	NA	NA	NA	intron_variant	3	97145265	C	T	1.16127e-05	1	172225	ADD	3.52714	1.33153	7.01687	2.09288	NA	UC
3:97145560:A:C	3	97145560	A	C	EPHA6	intron_variant	intron_variant	modifier	intron_variant	NA	NA	NA	NA	NA	NA	NA	NA	NA	intron_variant	3	97145560	A	C	1.45159e-05	1	172225	ADD	4.00474	1.36994	8.54566	2.46049	NA	CD
3:97145688:GT:G	3	97145688	GT	G	EPHA6	intron_variant	intron_variant	modifier	intron_variant	NA	NA	NA	NA	NA	NA	NA	NA	NA	intron_variant	3	97145688	GT	G	8.70954e-06	1	172225	ADD	3.89631	1.4103	7.63283	2.24173	NA	UC
3:97147153:A:G	3	97147153	A	G	EPHA6	intron_variant	intron_variant	modifier	intron_variant	NA	NA	NA	NA	NA	NA	NA	NA	NA	intron_variant	3	97147153	A	G	8.70954e-06	1	172225	ADD	4.38275	1.4261	9.44486	2.67419	NA	UC
3:97147604:GTTTA:G	3	97147604	GTTTA	G	EPHA6	intron_variant	intron_variant	modifier	intron_variant	NA	NA	NA	NA	NA	NA	NA	NA	NA	intron_variant	3	97147604	GTTTA	G	1.45159e-05	1	172225	ADD	3.47622	1.32542	6.87877	2.05935	NA	CD
3:97149527:AT:A	3	97149527	AT	A	EPHA6	intron_variant	intron_variant	modifier	intron_variant	NA	NA	NA	NA	NA	NA	NA	NA	NA	intron_variant	3	97149527	AT	A	8.70954e-06	1	172225	ADD	4.13882	1.47426	7.8814	2.3015	NA	UC
3:97149527:AT:A	3	97149527	AT	A	EPHA6	intron_variant	intron_variant	modifier	intron_variant	NA	NA	NA	NA	NA	NA	NA	NA	NA	intron_variant	3	97149527	AT	A	8.70954e-06	1	172225	ADD	5.1279	1.5785	10.5534	2.93564	NA	CD
3:97150049:T:C	3	97150049	T	C	EPHA6	intron_variant	intron_variant	modifier	intron_variant	NA	NA	NA	NA	NA	NA	NA	NA	NA	intron_variant	3	97150049	T	C	1.16127e-05	1	172225	ADD	4.49453	1.42999	9.87869	2.77675	NA	CD
3:97150848:G:T	3	97150848	G	T	EPHA6	intron_variant	intron_variant	modifier	intron_variant	NA	NA	NA	NA	NA	NA	NA	NA	NA	intron_variant	3	97150848	G	T	1.45159e-05	1	172225	ADD	3.37453	1.30756	6.66049	2.00624	NA	UC
3:97150882:C:A	3	97150882	C	A	EPHA6	intron_variant	intron_variant	modifier	intron_variant	NA	NA	NA	NA	NA	NA	NA	NA	NA	intron_variant	3	97150882	C	A	4.06445e-05	1	172225	ADD	2.69612	0.937737	8.2664	2.39378	NA	UC
3:97151575:G:T	3	97151575	G	T	EPHA6	intron_variant	intron_variant	modifier	intron_variant	NA	NA	NA	NA	NA	NA	NA	NA	NA	intron_variant	3	97151575	G	T	1.16127e-05	1	172225	ADD	4.20012	1.40688	8.91273	2.54792	NA	UC
3:97152521:G:A	3	97152521	G	A	EPHA6	intron_variant	intron_variant	modifier	intron_variant	NA	NA	NA	NA	NA	NA	NA	NA	NA	intron_variant	3	97152521	G	A	1.45159e-05	1	172225	ADD	3.8514	1.35284	8.10482	2.35509	NA	UC
3:97152540:G:T	3	97152540	G	T	EPHA6	intron_variant	intron_variant	modifier	intron_variant	NA	NA	NA	NA	NA	NA	NA	NA	NA	intron_variant	3	97152540	G	T	4.06445e-05	1	172225	ADD	3.33622	1.26689	6.93478	2.07296	NA	CD
3:97152653:C:T	3	97152653	C	T	EPHA6	intron_variant	intron_variant	modifier	intron_variant	NA	NA	NA	NA	NA	NA	NA	NA	NA	intron_variant	3	97152653	C	T	8.70954e-06	1	172225	ADD	3.70904	1.36085	7.42849	2.19247	NA	UC
3:97152804:A:C	3	97152804	A	C	EPHA6	intron_variant	intron_variant	modifier	intron_variant	NA	NA	NA	NA	NA	NA	NA	NA	NA	intron_variant	3	97152804	A	C	1.16127e-05	1	172225	ADD	3.95687	1.45323	7.41372	2.18891	NA	UC
3:97152892:C:A	3	97152892	C	A	EPHA6	intron_variant	intron_variant	modifier	intron_variant	NA	NA	NA	NA	NA	NA	NA	NA	NA	intron_variant	3	97152892	C	A	0.0251589	1	172225	ADD	-0.321333	0.10816	8.82632	2.52737	NA	UC
3:97153507:A:G	3	97153507	A	G	EPHA6	intron_variant	intron_variant	modifier	intron_variant	NA	NA	NA	NA	NA	NA	NA	NA	NA	intron_variant	3	97153507	A	G	2.61286e-05	1	172225	ADD	3.33994	1.28451	6.76082	2.03067	NA	CD
3:97156537:G:GA	3	97156537	G	GA	EPHA6	intron_variant	intron_variant	modifier	intron_variant	NA	NA	NA	NA	NA	NA	NA	NA	NA	intron_variant	3	97156537	G	GA	2.03223e-05	1	172225	ADD	4.2395	1.39035	9.29775	2.63934	NA	CD
3:97156808:G:T	3	97156808	G	T	EPHA6	intron_variant	intron_variant	modifier	intron_variant	NA	NA	NA	NA	NA	NA	NA	NA	NA	intron_variant	3	97156808	G	T	1.16127e-05	1	172225	ADD	4.73727	1.45903	10.5421	2.93297	NA	UC
3:97156922:G:A	3	97156922	G	A	EPHA6	intron_variant	intron_variant	modifier	intron_variant	NA	NA	NA	NA	NA	NA	NA	NA	NA	intron_variant	3	97156922	G	A	1.16128e-05	1	172224	ADD	4.0688	1.38445	8.63728	2.48234	NA	CD
3:97157559:A:G	3	97157559	A	G	EPHA6	intron_variant	intron_variant	modifier	intron_variant	NA	NA	NA	NA	NA	NA	NA	NA	NA	intron_variant	3	97157559	A	G	2.9032e-05	1	172224	ADD	3.45706	1.29497	7.12676	2.11952	NA	CD
3:97164731:G:T	3	97164731	G	T	EPHA6	intron_variant	intron_variant	modifier	intron_variant	NA	NA	NA	NA	NA	NA	NA	NA	NA	intron_variant	3	97164731	G	T	8.70954e-06	1	172225	ADD	3.61163	1.39063	6.74502	2.02683	NA	UC
3:97164786:A:G	3	97164786	A	G	EPHA6	intron_variant	intron_variant	modifier	intron_variant	NA	NA	NA	NA	NA	NA	NA	NA	NA	intron_variant	3	97164786	A	G	2.03223e-05	1	172225	ADD	3.36298	1.30208	6.67072	2.00873	NA	CD
3:97165902:A:G	3	97165902	A	G	EPHA6	intron_variant	intron_variant	modifier	intron_variant	NA	NA	NA	NA	NA	NA	NA	NA	NA	intron_variant	3	97165902	A	G	1.45159e-05	1	172225	ADD	3.42458	1.31265	6.80634	2.04175	NA	UC
3:97166077:A:G	3	97166077	A	G	EPHA6	intron_variant	intron_variant	modifier	intron_variant	NA	NA	NA	NA	NA	NA	NA	NA	NA	intron_variant	3	97166077	A	G	0.000113224	1	172225	ADD	2.86907	0.797946	12.9281	3.48987	NA	CD
3:97166090:G:T	3	97166090	G	T	EPHA6	intron_variant	intron_variant	modifier	intron_variant	NA	NA	NA	NA	NA	NA	NA	NA	NA	intron_variant	3	97166090	G	T	1.16127e-05	1	172225	ADD	3.58263	1.36431	6.89567	2.06346	NA	UC
3:97166367:T:TTA	3	97166367	T	TTA	EPHA6	intron_variant	intron_variant	modifier	intron_variant	NA	NA	NA	NA	NA	NA	NA	NA	NA	intron_variant	3	97166367	T	TTA	1.45159e-05	1	172225	ADD	3.77053	1.3566	7.72504	2.26392	NA	UC
3:97167158:A:G	3	97167158	A	G	EPHA6	intron_variant	intron_variant	modifier	intron_variant	NA	NA	NA	NA	NA	NA	NA	NA	NA	intron_variant	3	97167158	A	G	0.000107418	1	172225	ADD	2.3622	0.758474	9.69953	2.73444	NA	UC
3:97167622:C:T	3	97167622	C	T	EPHA6	intron_variant	intron_variant	modifier	intron_variant	NA	NA	NA	NA	NA	NA	NA	NA	NA	intron_variant	3	97167622	C	T	1.16127e-05	1	172225	ADD	3.51185	1.33922	6.87649	2.0588	NA	UC
3:97167622:C:T	3	97167622	C	T	EPHA6	intron_variant	intron_variant	modifier	intron_variant	NA	NA	NA	NA	NA	NA	NA	NA	NA	intron_variant	3	97167622	C	T	1.16127e-05	1	172225	ADD	3.94029	1.50361	6.86729	2.05657	NA	CD
3:97171065:G:A	3	97171065	G	A	EPHA6	intron_variant	intron_variant	modifier	intron_variant	NA	NA	NA	NA	NA	NA	NA	NA	NA	intron_variant	3	97171065	G	A	1.16127e-05	1	172225	ADD	3.54127	1.3471	6.91059	2.06709	NA	UC
3:97172248:C:T	3	97172248	C	T	EPHA6	intron_variant	intron_variant	modifier	intron_variant	NA	NA	NA	NA	NA	NA	NA	NA	NA	intron_variant	3	97172248	C	T	1.45159e-05	1	172225	ADD	3.70719	1.34469	7.60051	2.23395	NA	UC
3:97173119:A:C	3	97173119	A	C	EPHA6	intron_variant	intron_variant	modifier	intron_variant	NA	NA	NA	NA	NA	NA	NA	NA	NA	intron_variant	3	97173119	A	C	8.70954e-06	1	172225	ADD	3.72947	1.37219	7.38698	2.18245	NA	UC
3:97173180:G:A	3	97173180	G	A	EPHA6	intron_variant	intron_variant	modifier	intron_variant	NA	NA	NA	NA	NA	NA	NA	NA	NA	intron_variant	3	97173180	G	A	2.32254e-05	1	172225	ADD	3.98845	1.3621	8.57413	2.46728	NA	CD
3:97173364:C:G	3	97173364	C	G	EPHA6	intron_variant	intron_variant	modifier	intron_variant	NA	NA	NA	NA	NA	NA	NA	NA	NA	intron_variant	3	97173364	C	G	8.70954e-06	1	172225	ADD	5.22451	1.57231	11.0412	3.05009	NA	CD
3:97173364:C:G	3	97173364	C	G	EPHA6	intron_variant	intron_variant	modifier	intron_variant	NA	NA	NA	NA	NA	NA	NA	NA	NA	intron_variant	3	97173364	C	G	8.70954e-06	1	172225	ADD	4.85786	1.47699	10.8177	2.99768	NA	UC
3:97181761:C:G	3	97181761	C	G	EPHA6	intron_variant	intron_variant	modifier	intron_variant	NA	NA	NA	NA	NA	NA	NA	NA	NA	intron_variant	3	97181761	C	G	2.03223e-05	1	172225	ADD	3.49551	1.31169	7.10163	2.11343	NA	UC
3:97181761:C:G	3	97181761	C	G	EPHA6	intron_variant	intron_variant	modifier	intron_variant	NA	NA	NA	NA	NA	NA	NA	NA	NA	intron_variant	3	97181761	C	G	2.03223e-05	1	172225	ADD	4.09521	1.39803	8.58071	2.46885	NA	CD
3:97182035:T:C	3	97182035	T	C	EPHA6	intron_variant	intron_variant	modifier	intron_variant	NA	NA	NA	NA	NA	NA	NA	NA	NA	intron_variant	3	97182035	T	C	3.48381e-05	1	172225	ADD	2.55578	0.952878	7.19406	2.13581	NA	UC
3:97182480:G:T	3	97182480	G	T	EPHA6	intron_variant	intron_variant	modifier	intron_variant	NA	NA	NA	NA	NA	NA	NA	NA	NA	intron_variant	3	97182480	G	T	1.16127e-05	1	172225	ADD	4.04234	1.401	8.32509	2.40781	NA	CD
3:97182601:C:T	3	97182601	C	T	EPHA6	intron_variant	intron_variant	modifier	intron_variant	NA	NA	NA	NA	NA	NA	NA	NA	NA	intron_variant	3	97182601	C	T	1.16127e-05	1	172225	ADD	4.90863	1.47801	11.0297	3.04738	NA	CD
3:97182835:G:A	3	97182835	G	A	EPHA6	intron_variant	intron_variant	modifier	intron_variant	NA	NA	NA	NA	NA	NA	NA	NA	NA	intron_variant	3	97182835	G	A	8.70954e-06	1	172225	ADD	4.27996	1.45277	8.67931	2.49236	NA	CD
3:97182896:A:G	3	97182896	A	G	EPHA6	intron_variant	intron_variant	modifier	intron_variant	NA	NA	NA	NA	NA	NA	NA	NA	NA	intron_variant	3	97182896	A	G	8.70954e-06	1	172225	ADD	4.41712	1.44045	9.40339	2.66437	NA	CD
3:97182931:A:G	3	97182931	A	G	EPHA6	intron_variant	intron_variant	modifier	intron_variant	NA	NA	NA	NA	NA	NA	NA	NA	NA	intron_variant	3	97182931	A	G	0.000150965	1	172225	ADD	1.92307	0.71732	7.18731	2.13418	NA	UC
3:97183317:A:T	3	97183317	A	T	EPHA6	intron_variant	intron_variant	modifier	intron_variant	NA	NA	NA	NA	NA	NA	NA	NA	NA	intron_variant	3	97183317	A	T	2.32254e-05	1	172225	ADD	3.84576	1.34482	8.17774	2.37256	NA	CD
3:97183804:T:C	3	97183804	T	C	EPHA6	intron_variant	intron_variant	modifier	intron_variant	NA	NA	NA	NA	NA	NA	NA	NA	NA	intron_variant	3	97183804	T	C	1.74191e-05	1	172225	ADD	3.61327	1.33101	7.36956	2.17824	NA	CD
3:97183828:C:T	3	97183828	C	T	EPHA6	intron_variant	intron_variant	modifier	intron_variant	NA	NA	NA	NA	NA	NA	NA	NA	NA	intron_variant	3	97183828	C	T	1.45159e-05	1	172225	ADD	3.47173	1.32155	6.90122	2.06481	NA	CD
3:97183991:A:G	3	97183991	A	G	EPHA6	intron_variant	intron_variant	modifier	intron_variant	NA	NA	NA	NA	NA	NA	NA	NA	NA	intron_variant	3	97183991	A	G	8.70954e-06	1	172225	ADD	4.9366	1.52109	10.5328	2.9308	NA	CD
3:97187816:C:A	3	97187816	C	A	EPHA6	intron_variant	intron_variant	modifier	intron_variant	NA	NA	NA	NA	NA	NA	NA	NA	NA	intron_variant	3	97187816	C	A	6.67731e-05	1	172225	ADD	2.24427	0.842481	7.09626	2.11213	NA	CD
3:97187851:C:T	3	97187851	C	T	EPHA6	intron_variant	intron_variant	modifier	intron_variant	NA	NA	NA	NA	NA	NA	NA	NA	NA	intron_variant	3	97187851	C	T	5.51604e-05	1	172225	ADD	2.67409	0.792967	11.3721	3.12752	NA	UC
3:97188720:A:T	3	97188720	A	T	EPHA6	intron_variant	intron_variant	modifier	intron_variant	NA	NA	NA	NA	NA	NA	NA	NA	NA	intron_variant	3	97188720	A	T	1.45159e-05	1	172225	ADD	3.6288	1.33076	7.43579	2.19423	NA	UC
3:97189471:T:C	3	97189471	T	C	EPHA6	intron_variant	intron_variant	modifier	intron_variant	NA	NA	NA	NA	NA	NA	NA	NA	NA	intron_variant	3	97189471	T	C	2.90318e-05	1	172225	ADD	3.18983	0.992488	10.3296	2.88302	NA	UC
3:97189967:A:G	3	97189967	A	G	EPHA6	intron_variant	intron_variant	modifier	intron_variant	NA	NA	NA	NA	NA	NA	NA	NA	NA	intron_variant	3	97189967	A	G	1.16127e-05	1	172225	ADD	4.35416	1.16212	14.0381	3.7468	NA	UC
3:97190157:A:C	3	97190157	A	C	EPHA6	intron_variant	intron_variant	modifier	intron_variant	NA	NA	NA	NA	NA	NA	NA	NA	NA	intron_variant	3	97190157	A	C	8.70954e-06	1	172225	ADD	4.14276	1.41114	8.6187	2.47791	NA	UC
3:97198458:A:G	3	97198458	A	G	EPHA6	intron_variant	intron_variant	modifier	intron_variant	NA	NA	NA	NA	NA	NA	NA	NA	NA	intron_variant	3	97198458	A	G	8.70954e-06	1	172225	ADD	4.75076	1.54506	9.45449	2.67647	NA	CD
3:97199681:C:A	3	97199681	C	A	EPHA6	intron_variant	intron_variant	modifier	intron_variant	NA	NA	NA	NA	NA	NA	NA	NA	NA	intron_variant	3	97199681	C	A	1.45159e-05	1	172225	ADD	3.4335	1.31511	6.81633	2.04418	NA	UC
3:97201535:A:C	3	97201535	A	C	EPHA6	intron_variant	intron_variant	modifier	intron_variant	NA	NA	NA	NA	NA	NA	NA	NA	NA	intron_variant	3	97201535	A	C	1.45159e-05	1	172225	ADD	3.58975	1.32751	7.31228	2.16441	NA	CD
3:97201960:C:T	3	97201960	C	T	EPHA6	intron_variant	intron_variant	modifier	intron_variant	NA	NA	NA	NA	NA	NA	NA	NA	NA	intron_variant	3	97201960	C	T	1.16127e-05	1	172225	ADD	3.81555	1.40068	7.42058	2.19056	NA	CD
3:97203586:T:C	3	97203586	T	C	EPHA6	intron_variant	intron_variant	modifier	intron_variant	NA	NA	NA	NA	NA	NA	NA	NA	NA	intron_variant	3	97203586	T	C	8.70954e-05	1	172225	ADD	2.3045	0.888189	6.73198	2.02365	NA	UC
3:97204207:G:C	3	97204207	G	C	EPHA6	intron_variant	intron_variant	modifier	intron_variant	NA	NA	NA	NA	NA	NA	NA	NA	NA	intron_variant	3	97204207	G	C	1.45159e-05	1	172225	ADD	3.47173	1.32155	6.90122	2.06481	NA	CD
3:97204298:A:G	3	97204298	A	G	EPHA6	intron_variant	intron_variant	modifier	intron_variant	NA	NA	NA	NA	NA	NA	NA	NA	NA	intron_variant	3	97204298	A	G	2.61286e-05	1	172225	ADD	3.84279	1.04996	13.3952	3.59814	NA	UC
3:97206088:C:G	3	97206088	C	G	EPHA6	intron_variant	intron_variant	modifier	intron_variant	NA	NA	NA	NA	NA	NA	NA	NA	NA	intron_variant	3	97206088	C	G	8.70954e-06	1	172225	ADD	4.69803	1.52921	9.43833	2.67265	NA	CD
3:97206905:T:C	3	97206905	T	C	EPHA6	intron_variant	intron_variant	modifier	intron_variant	NA	NA	NA	NA	NA	NA	NA	NA	NA	intron_variant	3	97206905	T	C	1.16127e-05	1	172225	ADD	4.03221	1.42599	7.99567	2.32893	NA	CD
3:97206905:T:C	3	97206905	T	C	EPHA6	intron_variant	intron_variant	modifier	intron_variant	NA	NA	NA	NA	NA	NA	NA	NA	NA	intron_variant	3	97206905	T	C	1.16127e-05	1	172225	ADD	4.20685	1.3949	9.09548	2.59135	NA	UC
3:97207174:A:G	3	97207174	A	G	EPHA6	intron_variant	intron_variant	modifier	intron_variant	NA	NA	NA	NA	NA	NA	NA	NA	NA	intron_variant	3	97207174	A	G	1.16127e-05	1	172225	ADD	4.33216	1.42522	9.23948	2.62552	NA	UC
3:97207995:G:A	3	97207995	G	A	EPHA6	intron_variant	intron_variant	modifier	intron_variant	NA	NA	NA	NA	NA	NA	NA	NA	NA	intron_variant	3	97207995	G	A	6.09668e-05	1	172225	ADD	2.45096	0.912001	7.22241	2.14267	NA	UC
3:97208936:A:C	3	97208936	A	C	EPHA6	intron_variant	intron_variant	modifier	intron_variant	NA	NA	NA	NA	NA	NA	NA	NA	NA	intron_variant	3	97208936	A	C	8.70954e-06	1	172225	ADD	3.75866	1.37649	7.4562	2.19916	NA	UC
3:97209917:TA:T	3	97209917	TA	T	EPHA6	intron_variant	intron_variant	modifier	intron_variant	NA	NA	NA	NA	NA	NA	NA	NA	NA	intron_variant	3	97209917	TA	T	8.70954e-06	1	172225	ADD	4.25925	1.41545	9.05481	2.58169	NA	UC
3:97210099:T:C	3	97210099	T	C	EPHA6	intron_variant	intron_variant	modifier	intron_variant	NA	NA	NA	NA	NA	NA	NA	NA	NA	intron_variant	3	97210099	T	C	1.16127e-05	1	172225	ADD	4.60427	1.45746	9.97991	2.80064	NA	CD
3:97210567:CACTTCCCT:C	3	97210567	CACTTCCCT	C	EPHA6	intron_variant	intron_variant	modifier	intron_variant	NA	NA	NA	NA	NA	NA	NA	NA	NA	intron_variant	3	97210567	CACTTCCCT	C	2.90318e-05	1	172225	ADD	3.97769	1.34679	8.72293	2.50275	NA	CD
3:97212239:G:A	3	97212239	G	A	EPHA6	intron_variant	intron_variant	modifier	intron_variant	NA	NA	NA	NA	NA	NA	NA	NA	NA	intron_variant	3	97212239	G	A	8.70954e-06	1	172225	ADD	3.67131	1.38389	7.03784	2.09797	NA	CD
3:97212445:A:G	3	97212445	A	G	EPHA6	intron_variant	intron_variant	modifier	intron_variant	NA	NA	NA	NA	NA	NA	NA	NA	NA	intron_variant	3	97212445	A	G	1.16127e-05	1	172225	ADD	4.1928	1.12316	13.9357	3.72313	NA	UC
3:97213867:A:G	3	97213867	A	G	EPHA6	intron_variant	intron_variant	modifier	intron_variant	NA	NA	NA	NA	NA	NA	NA	NA	NA	intron_variant	3	97213867	A	G	0.000159675	1	172225	ADD	2.0635	0.647162	10.1668	2.84468	NA	UC
3:97214641:T:C	3	97214641	T	C	EPHA6	intron_variant	intron_variant	modifier	intron_variant	NA	NA	NA	NA	NA	NA	NA	NA	NA	intron_variant	3	97214641	T	C	1.45159e-05	1	172225	ADD	3.68053	1.33947	7.55014	2.22181	NA	UC
3:97215944:A:C	3	97215944	A	C	EPHA6	intron_variant	intron_variant	modifier	intron_variant	NA	NA	NA	NA	NA	NA	NA	NA	NA	intron_variant	3	97215944	A	C	0.00362317	1	172225	ADD	0.752151	0.280367	7.19707	2.13654	NA	CD
3:97220820:T:C	3	97220820	T	C	EPHA6	intron_variant	intron_variant	modifier	intron_variant	NA	NA	NA	NA	NA	NA	NA	NA	NA	intron_variant	3	97220820	T	C	5.51604e-05	1	172225	ADD	2.67409	0.792967	11.3721	3.12752	NA	UC
3:97221347:C:CG	3	97221347	C	CG	EPHA6	intron_variant	intron_variant	modifier	intron_variant	NA	NA	NA	NA	NA	NA	NA	NA	NA	intron_variant	3	97221347	C	CG	1.16127e-05	1	172225	ADD	4.33216	1.42522	9.23948	2.62552	NA	UC
3:97222172:G:A	3	97222172	G	A	EPHA6	intron_variant	intron_variant	modifier	intron_variant	NA	NA	NA	NA	NA	NA	NA	NA	NA	intron_variant	3	97222172	G	A	2.61286e-05	1	172225	ADD	3.5142	1.30194	7.28569	2.15798	NA	CD
3:97222668:T:C	3	97222668	T	C	EPHA6	intron_variant	intron_variant	modifier	intron_variant	NA	NA	NA	NA	NA	NA	NA	NA	NA	intron_variant	3	97222668	T	C	8.70954e-06	1	172225	ADD	3.90393	1.39969	7.7793	2.27697	NA	CD
3:97222965:A:C	3	97222965	A	C	EPHA6	intron_variant	intron_variant	modifier	intron_variant	NA	NA	NA	NA	NA	NA	NA	NA	NA	intron_variant	3	97222965	A	C	1.16127e-05	1	172225	ADD	4.16475	1.41338	8.68276	2.49318	NA	UC
3:97224323:G:A	3	97224323	G	A	EPHA6	intron_variant	intron_variant	modifier	intron_variant	NA	NA	NA	NA	NA	NA	NA	NA	NA	intron_variant	3	97224323	G	A	1.16127e-05	1	172225	ADD	3.43474	1.32849	6.68456	2.0121	NA	CD
3:97224891:A:C	3	97224891	A	C	EPHA6	intron_variant	intron_variant	modifier	intron_variant	NA	NA	NA	NA	NA	NA	NA	NA	NA	intron_variant	3	97224891	A	C	2.61286e-05	1	172225	ADD	3.86835	1.06605	13.1674	3.54536	NA	CD
3:97226919:T:G	3	97226919	T	G	EPHA6	intron_variant	intron_variant	modifier	intron_variant	NA	NA	NA	NA	NA	NA	NA	NA	NA	intron_variant	3	97226919	T	G	8.70954e-06	1	172225	ADD	5.16593	1.52225	11.5166	3.16128	NA	CD
3:97229698:T:G	3	97229698	T	G	EPHA6	intron_variant	intron_variant	modifier	intron_variant	NA	NA	NA	NA	NA	NA	NA	NA	NA	intron_variant	3	97229698	T	G	2.90318e-05	1	172225	ADD	3.65595	1.31321	7.7506	2.27007	NA	CD
3:97230453:A:C	3	97230453	A	C	EPHA6	intron_variant	intron_variant	modifier	intron_variant	NA	NA	NA	NA	NA	NA	NA	NA	NA	intron_variant	3	97230453	A	C	8.70954e-06	1	172225	ADD	4.29849	1.42386	9.1137	2.59568	NA	UC
3:97230561:C:T	3	97230561	C	T	EPHA6	intron_variant	intron_variant	modifier	intron_variant	NA	NA	NA	NA	NA	NA	NA	NA	NA	intron_variant	3	97230561	C	T	3.1935e-05	1	172225	ADD	3.4713	1.29416	7.19466	2.13596	NA	CD
3:97231261:G:A	3	97231261	G	A	EPHA6	intron_variant	intron_variant	modifier	intron_variant	NA	NA	NA	NA	NA	NA	NA	NA	NA	intron_variant	3	97231261	G	A	1.16127e-05	1	172225	ADD	4.09272	1.47379	7.71177	2.26073	NA	CD
3:97233380:G:T	3	97233380	G	T	EPHA6	intron_variant	intron_variant	modifier	intron_variant	NA	NA	NA	NA	NA	NA	NA	NA	NA	intron_variant	3	97233380	G	T	1.16127e-05	1	172225	ADD	3.42606	1.32253	6.71084	2.0185	NA	UC
3:97233380:G:T	3	97233380	G	T	EPHA6	intron_variant	intron_variant	modifier	intron_variant	NA	NA	NA	NA	NA	NA	NA	NA	NA	intron_variant	3	97233380	G	T	1.16127e-05	1	172225	ADD	4.9001	1.53159	10.2359	2.86096	NA	CD
3:97233434:C:T	3	97233434	C	T	EPHA6	intron_variant	intron_variant	modifier	intron_variant	NA	NA	NA	NA	NA	NA	NA	NA	NA	intron_variant	3	97233434	C	T	2.03223e-05	1	172225	ADD	3.39553	1.31519	6.66555	2.00747	NA	CD
3:97233549:GAT:G	3	97233549	GAT	G	EPHA6	intron_variant	intron_variant	modifier	intron_variant	NA	NA	NA	NA	NA	NA	NA	NA	NA	intron_variant	3	97233549	GAT	G	1.74191e-05	1	172225	ADD	3.35543	1.29281	6.73636	2.02472	NA	UC
3:97233704:G:A	3	97233704	G	A	EPHA6	intron_variant	intron_variant	modifier	intron_variant	NA	NA	NA	NA	NA	NA	NA	NA	NA	intron_variant	3	97233704	G	A	0.000188707	1	172225	ADD	2.05896	0.728267	7.99309	2.32831	NA	CD
3:97235337:C:G	3	97235337	C	G	EPHA6	intron_variant	intron_variant	modifier	intron_variant	NA	NA	NA	NA	NA	NA	NA	NA	NA	intron_variant	3	97235337	C	G	1.45159e-05	1	172225	ADD	4.05608	1.38202	8.61356	2.47668	NA	UC
3:97235965:T:C	3	97235965	T	C	EPHA6	intron_variant	intron_variant	modifier	intron_variant	NA	NA	NA	NA	NA	NA	NA	NA	NA	intron_variant	3	97235965	T	C	2.90318e-05	1	172225	ADD	3.4148	1.30585	6.83829	2.04952	NA	CD
3:97236043:T:C	3	97236043	T	C	EPHA6	intron_variant	intron_variant	modifier	intron_variant	NA	NA	NA	NA	NA	NA	NA	NA	NA	intron_variant	3	97236043	T	C	1.74191e-05	1	172225	ADD	3.48491	1.30587	7.12176	2.11831	NA	CD
3:97236330:A:G	3	97236330	A	G	EPHA6	intron_variant	intron_variant	modifier	intron_variant	NA	NA	NA	NA	NA	NA	NA	NA	NA	intron_variant	3	97236330	A	G	8.70954e-06	1	172225	ADD	3.92989	1.40067	7.8721	2.29927	NA	UC
3:97238977:A:T	3	97238977	A	T	EPHA6	intron_variant	intron_variant	modifier	intron_variant	NA	NA	NA	NA	NA	NA	NA	NA	NA	intron_variant	3	97238977	A	T	1.16127e-05	1	172225	ADD	4.88491	1.20453	16.4468	4.30073	NA	CD
3:97238977:A:T	3	97238977	A	T	EPHA6	intron_variant	intron_variant	modifier	intron_variant	NA	NA	NA	NA	NA	NA	NA	NA	NA	intron_variant	3	97238977	A	T	1.16127e-05	1	172225	ADD	3.86406	1.37221	7.92952	2.31305	NA	UC
3:97240173:G:C	3	97240173	G	C	EPHA6	intron_variant	intron_variant	modifier	intron_variant	NA	NA	NA	NA	NA	NA	NA	NA	NA	intron_variant	3	97240173	G	C	1.74191e-05	1	172225	ADD	3.40856	1.30813	6.78959	2.03767	NA	UC
3:97241038:G:A	3	97241038	G	A	EPHA6	intron_variant	intron_variant	modifier	intron_variant	NA	NA	NA	NA	NA	NA	NA	NA	NA	intron_variant	3	97241038	G	A	1.45159e-05	1	172225	ADD	4.67196	1.44492	10.4547	2.91243	NA	CD
3:97241331:T:C	3	97241331	T	C	EPHA6	intron_variant	intron_variant	modifier	intron_variant	NA	NA	NA	NA	NA	NA	NA	NA	NA	intron_variant	3	97241331	T	C	1.45159e-05	1	172225	ADD	3.75285	1.34683	7.76425	2.27335	NA	UC
3:97243048:A:T	3	97243048	A	T	EPHA6	intron_variant	intron_variant	modifier	intron_variant	NA	NA	NA	NA	NA	NA	NA	NA	NA	intron_variant	3	97243048	A	T	1.16127e-05	1	172225	ADD	3.55024	1.34215	6.99704	2.08807	NA	UC
3:97243087:C:T	3	97243087	C	T	EPHA6	intron_variant	intron_variant	modifier	intron_variant	NA	NA	NA	NA	NA	NA	NA	NA	NA	intron_variant	3	97243087	C	T	1.74191e-05	1	172225	ADD	3.38351	1.29332	6.8442	2.05095	NA	UC
3:97243138:C:T	3	97243138	C	T	EPHA6	intron_variant	intron_variant	modifier	intron_variant	NA	NA	NA	NA	NA	NA	NA	NA	NA	intron_variant	3	97243138	C	T	8.70954e-06	1	172225	ADD	4.87363	1.5002	10.5537	2.93571	NA	CD
3:97243271:A:G	3	97243271	A	G	EPHA6	intron_variant	intron_variant	modifier	intron_variant	NA	NA	NA	NA	NA	NA	NA	NA	NA	intron_variant	3	97243271	A	G	1.16127e-05	1	172225	ADD	3.69797	1.36986	7.28741	2.15839	NA	UC
3:97243271:A:G	3	97243271	A	G	EPHA6	intron_variant	intron_variant	modifier	intron_variant	NA	NA	NA	NA	NA	NA	NA	NA	NA	intron_variant	3	97243271	A	G	1.16127e-05	1	172225	ADD	3.51281	1.32919	6.98444	2.08502	NA	CD
3:97243855:A:T	3	97243855	A	T	EPHA6	intron_variant	intron_variant	modifier	intron_variant	NA	NA	NA	NA	NA	NA	NA	NA	NA	intron_variant	3	97243855	A	T	1.16127e-05	1	172225	ADD	3.5275	1.32407	7.09759	2.11245	NA	UC
3:97244303:G:A	3	97244303	G	A	EPHA6	intron_variant;missense_variant	missense_variant	moderate	coding_sequence_variant	NA	NA	NA	NA;0.036	0.036	NA;tolerated_low_confidence	tolerated_low_confidence	NA;benign	benign	intron_variant;missense_variant	3	97244303	G	A	9.58049e-05	1	172225	ADD	2.56396	0.911232	7.91708	2.31007	NA	CD
3:97244681:G:A	3	97244681	G	A	EPHA6	intron_variant;3_prime_UTR_variant	3_prime_UTR_variant	modifier	UTR_variant	NA	NA	NA	NA	NA	NA	NA	NA	NA	intron_variant;3_prime_UTR_variant	3	97244681	G	A	1.16127e-05	1	172225	ADD	3.79494	1.38231	7.53696	2.21863	NA	UC
3:97244712:A:G	3	97244712	A	G	EPHA6	intron_variant;downstream_gene_variant	intron_variant	modifier	intron_variant	NA	NA	NA	NA	NA	NA	NA	NA	NA	intron_variant;downstream_gene_variant	3	97244712	A	G	8.70954e-06	1	172225	ADD	3.92503	1.42725	7.56286	2.22488	NA	UC
3:97245553:G:A	3	97245553	G	A	EPHA6	intron_variant;downstream_gene_variant	intron_variant	modifier	intron_variant	NA	NA	NA	NA	NA	NA	NA	NA	NA	intron_variant;downstream_gene_variant	3	97245553	G	A	1.45159e-05	1	172225	ADD	3.77587	1.33983	7.94211	2.31608	NA	UC
3:97246169:G:C	3	97246169	G	C	EPHA6	intron_variant;downstream_gene_variant	intron_variant	modifier	intron_variant	NA	NA	NA	NA	NA	NA	NA	NA	NA	intron_variant;downstream_gene_variant	3	97246169	G	C	1.16127e-05	1	172225	ADD	3.62062	1.38371	6.84658	2.05153	NA	UC
3:97246235:T:A	3	97246235	T	A	EPHA6	intron_variant;downstream_gene_variant	intron_variant	modifier	intron_variant	NA	NA	NA	NA	NA	NA	NA	NA	NA	intron_variant;downstream_gene_variant	3	97246235	T	A	1.74191e-05	1	172225	ADD	3.43848	1.31995	6.78608	2.03682	NA	UC
3:97246355:TTTCA:T	3	97246355	TTTCA	T	EPHA6	intron_variant;downstream_gene_variant	intron_variant	modifier	intron_variant	NA	NA	NA	NA	NA	NA	NA	NA	NA	intron_variant;downstream_gene_variant	3	97246355	TTTCA	T	1.45159e-05	1	172225	ADD	4.07372	1.37219	8.81365	2.52435	NA	CD
3:97247683:G:A	3	97247683	G	A	EPHA6	intron_variant;downstream_gene_variant	intron_variant	modifier	intron_variant	NA	NA	NA	NA	NA	NA	NA	NA	NA	intron_variant;downstream_gene_variant	3	97247683	G	A	1.45159e-05	1	172225	ADD	4.35353	1.43279	9.23255	2.62388	NA	CD
3:97248044:T:G	3	97248044	T	G	EPHA6	intron_variant;downstream_gene_variant	intron_variant	modifier	intron_variant	NA	NA	NA	NA	NA	NA	NA	NA	NA	intron_variant;downstream_gene_variant	3	97248044	T	G	0.000203223	1	172225	ADD	2.18044	0.655023	11.0809	3.05937	NA	CD
3:97249629:A:G	3	97249629	A	G	EPHA6	intron_variant;downstream_gene_variant	intron_variant	modifier	intron_variant	NA	NA	NA	NA	NA	NA	NA	NA	NA	intron_variant;downstream_gene_variant	3	97249629	A	G	1.45159e-05	1	172225	ADD	3.4103	1.31697	6.7055	2.0172	NA	CD
3:97252285:A:AG	3	97252285	A	AG	EPHA6	intron_variant	intron_variant	modifier	intron_variant	NA	NA	NA	NA	NA	NA	NA	NA	NA	intron_variant	3	97252285	A	AG	8.70954e-06	1	172225	ADD	5.00089	1.49686	11.1617	3.07829	NA	CD
3:97253423:GGATTTCAGTTATC:G	3	97253423	GGATTTCAGTTATC	G	EPHA6	intron_variant	intron_variant	modifier	intron_variant	NA	NA	NA	NA	NA	NA	NA	NA	NA	intron_variant	3	97253423	GGATTTCAGTTATC	G	1.16127e-05	1	172225	ADD	4.41046	1.42955	9.51845	2.69162	NA	CD
3:97253423:GGATTTCAGTTATC:G	3	97253423	GGATTTCAGTTATC	G	EPHA6	intron_variant	intron_variant	modifier	intron_variant	NA	NA	NA	NA	NA	NA	NA	NA	NA	intron_variant	3	97253423	GGATTTCAGTTATC	G	1.16127e-05	1	172225	ADD	4.37318	1.42023	9.48148	2.68286	NA	UC
3:97253599:C:G	3	97253599	C	G	EPHA6	intron_variant	intron_variant	modifier	intron_variant	NA	NA	NA	NA	NA	NA	NA	NA	NA	intron_variant	3	97253599	C	G	8.70954e-06	1	172225	ADD	4.08102	1.44325	7.99566	2.32892	NA	CD
3:97253599:C:G	3	97253599	C	G	EPHA6	intron_variant	intron_variant	modifier	intron_variant	NA	NA	NA	NA	NA	NA	NA	NA	NA	intron_variant	3	97253599	C	G	8.70954e-06	1	172225	ADD	4.18612	1.41329	8.77329	2.51474	NA	UC
3:97254079:G:T	3	97254079	G	T	EPHA6	intron_variant	intron_variant	modifier	intron_variant	NA	NA	NA	NA	NA	NA	NA	NA	NA	intron_variant	3	97254079	G	T	8.70954e-06	1	172225	ADD	5.5528	1.5533	12.7794	3.45538	NA	CD
3:97255613:T:A	3	97255613	T	A	EPHA6	intron_variant	intron_variant	modifier	intron_variant	NA	NA	NA	NA	NA	NA	NA	NA	NA	intron_variant	3	97255613	T	A	2.90318e-05	1	172225	ADD	3.64597	1.3234	7.59003	2.23142	NA	CD
3:97255616:A:G	3	97255616	A	G	EPHA6	intron_variant	intron_variant	modifier	intron_variant	NA	NA	NA	NA	NA	NA	NA	NA	NA	intron_variant	3	97255616	A	G	2.90318e-05	1	172225	ADD	3.64597	1.3234	7.59003	2.23142	NA	CD
3:97256251:TCA:T	3	97256251	TCA	T	EPHA6	intron_variant	intron_variant	modifier	intron_variant	NA	NA	NA	NA	NA	NA	NA	NA	NA	intron_variant	3	97256251	TCA	T	8.70954e-06	1	172225	ADD	4.11034	1.41232	8.47014	2.44246	NA	UC
3:97256329:T:C	3	97256329	T	C	EPHA6	intron_variant	intron_variant	modifier	intron_variant	NA	NA	NA	NA	NA	NA	NA	NA	NA	intron_variant	3	97256329	T	C	8.70954e-06	1	172225	ADD	4.23223	1.43266	8.7267	2.50365	NA	UC
3:97256709:TGTG:T	3	97256709	TGTG	T	EPHA6	intron_variant	intron_variant	modifier	intron_variant	NA	NA	NA	NA	NA	NA	NA	NA	NA	intron_variant	3	97256709	TGTG	T	2.32254e-05	1	172225	ADD	3.67901	1.35189	7.40589	2.18702	NA	CD
3:97257105:A:C	3	97257105	A	C	EPHA6	intron_variant	intron_variant	modifier	intron_variant	NA	NA	NA	NA	NA	NA	NA	NA	NA	intron_variant	3	97257105	A	C	8.70954e-06	1	172225	ADD	4.12255	1.43244	8.28282	2.3977	NA	CD
3:97257955:T:C	3	97257955	T	C	EPHA6	intron_variant	intron_variant	modifier	intron_variant	NA	NA	NA	NA	NA	NA	NA	NA	NA	intron_variant	3	97257955	T	C	1.74191e-05	1	172225	ADD	4.03712	1.37008	8.68269	2.49316	NA	CD
3:97257968:A:G	3	97257968	A	G	EPHA6	intron_variant	intron_variant	modifier	intron_variant	NA	NA	NA	NA	NA	NA	NA	NA	NA	intron_variant	3	97257968	A	G	8.70954e-06	1	172225	ADD	4.05315	1.40556	8.31552	2.40552	NA	UC
3:97257968:A:G	3	97257968	A	G	EPHA6	intron_variant	intron_variant	modifier	intron_variant	NA	NA	NA	NA	NA	NA	NA	NA	NA	intron_variant	3	97257968	A	G	8.70954e-06	1	172225	ADD	4.46206	1.45357	9.42322	2.66907	NA	CD
3:97258414:G:A	3	97258414	G	A	EPHA6	intron_variant	intron_variant	modifier	intron_variant	NA	NA	NA	NA	NA	NA	NA	NA	NA	intron_variant	3	97258414	G	A	1.45159e-05	1	172225	ADD	3.48189	1.31689	6.99086	2.08657	NA	UC
3:97259322:ACT:A	3	97259322	ACT	A	EPHA6	intron_variant	intron_variant	modifier	intron_variant	NA	NA	NA	NA	NA	NA	NA	NA	NA	intron_variant	3	97259322	ACT	A	0.000156772	1	172225	ADD	1.93708	0.716408	7.31095	2.16408	NA	UC
3:97260211:T:C	3	97260211	T	C	EPHA6	intron_variant	intron_variant	modifier	intron_variant	NA	NA	NA	NA	NA	NA	NA	NA	NA	intron_variant	3	97260211	T	C	8.70954e-06	1	172225	ADD	3.9671	1.3894	8.15247	2.36651	NA	UC
3:97260603:T:C	3	97260603	T	C	EPHA6	intron_variant	intron_variant	modifier	intron_variant	NA	NA	NA	NA	NA	NA	NA	NA	NA	intron_variant	3	97260603	T	C	8.70954e-06	1	172225	ADD	4.85945	1.49335	10.589	2.94399	NA	CD
3:97260932:C:T	3	97260932	C	T	EPHA6	intron_variant	intron_variant	modifier	intron_variant	NA	NA	NA	NA	NA	NA	NA	NA	NA	intron_variant	3	97260932	C	T	2.90318e-05	1	172225	ADD	3.52173	1.30955	7.23216	2.14503	NA	CD
3:97261230:A:G	3	97261230	A	G	EPHA6	intron_variant	intron_variant	modifier	intron_variant	NA	NA	NA	NA	NA	NA	NA	NA	NA	intron_variant	3	97261230	A	G	1.16127e-05	1	172225	ADD	4.43785	1.44319	9.4558	2.67679	NA	CD
3:97261230:A:G	3	97261230	A	G	EPHA6	intron_variant	intron_variant	modifier	intron_variant	NA	NA	NA	NA	NA	NA	NA	NA	NA	intron_variant	3	97261230	A	G	1.16127e-05	1	172225	ADD	5.23633	1.10763	22.3493	5.64341	NA	UC
3:97261320:A:C	3	97261320	A	C	EPHA6	intron_variant	intron_variant	modifier	intron_variant	NA	NA	NA	NA	NA	NA	NA	NA	NA	intron_variant	3	97261320	A	C	2.90318e-05	1	172225	ADD	3.28769	1.27297	6.67034	2.00864	NA	UC
3:97262001:A:C	3	97262001	A	C	EPHA6	intron_variant	intron_variant	modifier	intron_variant	NA	NA	NA	NA	NA	NA	NA	NA	NA	intron_variant	3	97262001	A	C	0.000272899	1	172225	ADD	1.8409	0.706268	6.79391	2.03872	NA	CD
3:97262506:T:C	3	97262506	T	C	EPHA6	intron_variant	intron_variant	modifier	intron_variant	NA	NA	NA	NA	NA	NA	NA	NA	NA	intron_variant	3	97262506	T	C	1.16127e-05	1	172225	ADD	4.80719	1.46713	10.7361	2.97854	NA	CD
3:97262506:T:C	3	97262506	T	C	EPHA6	intron_variant	intron_variant	modifier	intron_variant	NA	NA	NA	NA	NA	NA	NA	NA	NA	intron_variant	3	97262506	T	C	1.16127e-05	1	172225	ADD	4.31172	1.41174	9.32803	2.64652	NA	UC
3:97263012:T:A	3	97263012	T	A	EPHA6	intron_variant	intron_variant	modifier	intron_variant	NA	NA	NA	NA	NA	NA	NA	NA	NA	intron_variant	3	97263012	T	A	8.70954e-06	1	172225	ADD	4.32562	1.42488	9.21591	2.61993	NA	UC
3:97263058:T:C	3	97263058	T	C	EPHA6	intron_variant	intron_variant	modifier	intron_variant	NA	NA	NA	NA	NA	NA	NA	NA	NA	intron_variant	3	97263058	T	C	1.45159e-05	1	172225	ADD	3.7889	1.3595	7.76723	2.27407	NA	UC
3:97263946:A:G	3	97263946	A	G	EPHA6	intron_variant	intron_variant	modifier	intron_variant	NA	NA	NA	NA	NA	NA	NA	NA	NA	intron_variant	3	97263946	A	G	0.000232254	1	172225	ADD	1.71644	0.616456	7.7527	2.27057	NA	UC
3:97266605:T:C	3	97266605	T	C	EPHA6	intron_variant	intron_variant	modifier	intron_variant	NA	NA	NA	NA	NA	NA	NA	NA	NA	intron_variant	3	97266605	T	C	0.00019161	1	172225	ADD	1.88329	0.630945	8.9095	2.54715	NA	UC
3:97267246:T:C	3	97267246	T	C	EPHA6	intron_variant	intron_variant	modifier	intron_variant	NA	NA	NA	NA	NA	NA	NA	NA	NA	intron_variant	3	97267246	T	C	8.70954e-06	1	172225	ADD	4.7228	1.47112	10.3063	2.87754	NA	UC
3:97267472:A:C	3	97267472	A	C	EPHA6	intron_variant	intron_variant	modifier	intron_variant	NA	NA	NA	NA	NA	NA	NA	NA	NA	intron_variant	3	97267472	A	C	8.70954e-06	1	172225	ADD	3.9247	1.40483	7.80491	2.28312	NA	UC
3:97267749:G:T	3	97267749	G	T	EPHA6	intron_variant	intron_variant	modifier	intron_variant	NA	NA	NA	NA	NA	NA	NA	NA	NA	intron_variant	3	97267749	G	T	8.70954e-06	1	172225	ADD	4.54335	1.46628	9.60106	2.71116	NA	UC
3:97268567:T:C	3	97268567	T	C	EPHA6	intron_variant	intron_variant	modifier	intron_variant	NA	NA	NA	NA	NA	NA	NA	NA	NA	intron_variant	3	97268567	T	C	5.51604e-05	1	172225	ADD	2.83926	0.819494	12.0038	3.27496	NA	UC
3:97268768:T:C	3	97268768	T	C	EPHA6	intron_variant	intron_variant	modifier	intron_variant	NA	NA	NA	NA	NA	NA	NA	NA	NA	intron_variant	3	97268768	T	C	1.74191e-05	1	172225	ADD	3.46937	1.31031	7.01056	2.09135	NA	CD
3:97269137:C:T	3	97269137	C	T	EPHA6	intron_variant	intron_variant	modifier	intron_variant	NA	NA	NA	NA	NA	NA	NA	NA	NA	intron_variant	3	97269137	C	T	4.35477e-05	1	172225	ADD	3.9615	1.05418	14.1217	3.76609	NA	CD
3:97269777:T:C	3	97269777	T	C	EPHA6	intron_variant	intron_variant	modifier	intron_variant	NA	NA	NA	NA	NA	NA	NA	NA	NA	intron_variant	3	97269777	T	C	8.70954e-06	1	172225	ADD	4.34641	1.45459	8.92851	2.55168	NA	CD
3:97270901:T:G	3	97270901	T	G	EPHA6	intron_variant	intron_variant	modifier	intron_variant	NA	NA	NA	NA	NA	NA	NA	NA	NA	intron_variant	3	97270901	T	G	1.16127e-05	1	172225	ADD	4.0688	1.38445	8.63728	2.48234	NA	CD
3:97278344:A:T	3	97278344	A	T	EPHA6	intron_variant	intron_variant	modifier	intron_variant	NA	NA	NA	NA	NA	NA	NA	NA	NA	intron_variant	3	97278344	A	T	8.70954e-06	1	172225	ADD	4.17242	1.41717	8.6683	2.48973	NA	CD
3:97278385:T:A	3	97278385	T	A	EPHA6	intron_variant	intron_variant	modifier	intron_variant	NA	NA	NA	NA	NA	NA	NA	NA	NA	intron_variant	3	97278385	T	A	0.000194513	1	172225	ADD	1.85052	0.628262	8.6757	2.4915	NA	UC
3:97279400:G:C	3	97279400	G	C	EPHA6	intron_variant	intron_variant	modifier	intron_variant	NA	NA	NA	NA	NA	NA	NA	NA	NA	intron_variant	3	97279400	G	C	8.70954e-06	1	172225	ADD	3.72169	1.4112	6.95506	2.07789	NA	CD
3:97279861:G:T	3	97279861	G	T	EPHA6	intron_variant	intron_variant	modifier	intron_variant	NA	NA	NA	NA	NA	NA	NA	NA	NA	intron_variant	3	97279861	G	T	2.32254e-05	1	172225	ADD	3.84576	1.34482	8.17774	2.37256	NA	CD
3:97281235:G:A	3	97281235	G	A	EPHA6	intron_variant	intron_variant	modifier	intron_variant	NA	NA	NA	NA	NA	NA	NA	NA	NA	intron_variant	3	97281235	G	A	0.000110321	1	172225	ADD	2.04484	0.738748	7.66168	2.24867	NA	UC
3:97281506:TA:T	3	97281506	TA	T	EPHA6	intron_variant	intron_variant	modifier	intron_variant	NA	NA	NA	NA	NA	NA	NA	NA	NA	intron_variant	3	97281506	TA	T	1.16127e-05	1	172225	ADD	4.64586	1.44869	10.2845	2.8724	NA	CD
3:97281867:T:C	3	97281867	T	C	EPHA6	intron_variant	intron_variant	modifier	intron_variant	NA	NA	NA	NA	NA	NA	NA	NA	NA	intron_variant	3	97281867	T	C	0.000194513	1	172225	ADD	1.85052	0.628262	8.6757	2.4915	NA	UC
3:97281918:A:C	3	97281918	A	C	EPHA6	intron_variant	intron_variant	modifier	intron_variant	NA	NA	NA	NA	NA	NA	NA	NA	NA	intron_variant	3	97281918	A	C	0.0372188	1	172225	ADD	0.300652	0.101845	8.7147	2.50079	NA	CD
3:97284483:G:C	3	97284483	G	C	EPHA6	intron_variant	intron_variant	modifier	intron_variant	NA	NA	NA	NA	NA	NA	NA	NA	NA	intron_variant	3	97284483	G	C	1.45159e-05	1	172225	ADD	3.97041	1.36842	8.41842	2.43011	NA	UC
3:97284521:A:G	3	97284521	A	G	EPHA6	intron_variant	intron_variant	modifier	intron_variant	NA	NA	NA	NA	NA	NA	NA	NA	NA	intron_variant	3	97284521	A	G	1.74191e-05	1	172225	ADD	3.56626	1.3147	7.35826	2.17551	NA	UC
3:97284521:A:G	3	97284521	A	G	EPHA6	intron_variant	intron_variant	modifier	intron_variant	NA	NA	NA	NA	NA	NA	NA	NA	NA	intron_variant	3	97284521	A	G	1.74191e-05	1	172225	ADD	3.42695	1.3186	6.75441	2.02911	NA	CD
3:97285119:G:C	3	97285119	G	C	EPHA6	intron_variant	intron_variant	modifier	intron_variant	NA	NA	NA	NA	NA	NA	NA	NA	NA	intron_variant	3	97285119	G	C	2.61286e-05	1	172225	ADD	3.36823	1.28319	6.89003	2.06209	NA	CD
3:97298726:T:C	3	97298726	T	C	EPHA6	intron_variant	intron_variant	modifier	intron_variant	NA	NA	NA	NA	NA	NA	NA	NA	NA	intron_variant	3	97298726	T	C	5.22572e-05	1	172225	ADD	3.18155	0.983751	10.4594	2.91355	NA	CD
3:97298827:T:C	3	97298827	T	C	EPHA6	intron_variant	intron_variant	modifier	intron_variant	NA	NA	NA	NA	NA	NA	NA	NA	NA	intron_variant	3	97298827	T	C	8.70954e-06	1	172225	ADD	4.88139	1.48809	10.7604	2.98425	NA	CD
3:97298838:A:T	3	97298838	A	T	EPHA6	intron_variant	intron_variant	modifier	intron_variant	NA	NA	NA	NA	NA	NA	NA	NA	NA	intron_variant	3	97298838	A	T	8.70954e-06	1	172225	ADD	5.50355	1.59947	11.8395	3.23667	NA	CD
3:97298838:A:T	3	97298838	A	T	EPHA6	intron_variant	intron_variant	modifier	intron_variant	NA	NA	NA	NA	NA	NA	NA	NA	NA	intron_variant	3	97298838	A	T	8.70954e-06	1	172225	ADD	3.75805	1.3665	7.56322	2.22496	NA	UC
3:97299337:G:T	3	97299337	G	T	EPHA6	intron_variant	intron_variant	modifier	intron_variant	NA	NA	NA	NA	NA	NA	NA	NA	NA	intron_variant	3	97299337	G	T	8.70954e-06	1	172225	ADD	4.24741	1.44634	8.62394	2.47916	NA	CD
3:97300914:G:A	3	97300914	G	A	EPHA6	intron_variant	intron_variant	modifier	intron_variant	NA	NA	NA	NA	NA	NA	NA	NA	NA	intron_variant	3	97300914	G	A	0.000217738	1	172225	ADD	1.64737	0.612311	7.2383	2.14652	NA	UC
3:97300946:C:T	3	97300946	C	T	EPHA6	intron_variant	intron_variant	modifier	intron_variant	NA	NA	NA	NA	NA	NA	NA	NA	NA	intron_variant	3	97300946	C	T	0.000223545	1	172225	ADD	1.61832	0.609713	7.04493	2.09969	NA	UC
3:97301198:G:A	3	97301198	G	A	EPHA6	intron_variant	intron_variant	modifier	intron_variant	NA	NA	NA	NA	NA	NA	NA	NA	NA	intron_variant	3	97301198	G	A	0.000214835	1	172225	ADD	1.67426	0.614547	7.42227	2.19097	NA	UC
3:97301980:C:G	3	97301980	C	G	EPHA6	intron_variant	intron_variant	modifier	intron_variant	NA	NA	NA	NA	NA	NA	NA	NA	NA	intron_variant	3	97301980	C	G	2.32254e-05	1	172225	ADD	3.72785	1.33396	7.80967	2.28427	NA	CD
3:97302477:G:GT	3	97302477	G	GT	EPHA6	intron_variant	intron_variant	modifier	intron_variant	NA	NA	NA	NA	NA	NA	NA	NA	NA	intron_variant	3	97302477	G	GT	0.000325156	1	172225	ADD	2.08978	0.581203	12.9284	3.48995	NA	CD
3:97302658:C:G	3	97302658	C	G	EPHA6	intron_variant	intron_variant	modifier	intron_variant	NA	NA	NA	NA	NA	NA	NA	NA	NA	intron_variant	3	97302658	C	G	1.16127e-05	1	172225	ADD	4.2505	1.40448	9.15903	2.60644	NA	UC
3:97303371:A:G	3	97303371	A	G	EPHA6	intron_variant	intron_variant	modifier	intron_variant	NA	NA	NA	NA	NA	NA	NA	NA	NA	intron_variant	3	97303371	A	G	0.000978371	1	172225	ADD	1.20687	0.444175	7.38263	2.1814	NA	CD
3:97306242:A:T	3	97306242	A	T	EPHA6	intron_variant	intron_variant	modifier	intron_variant	NA	NA	NA	NA	NA	NA	NA	NA	NA	intron_variant	3	97306242	A	T	1.45159e-05	1	172225	ADD	3.81029	1.38635	7.55385	2.2227	NA	CD
3:97306689:A:C	3	97306689	A	C	EPHA6	intron_variant	intron_variant	modifier	intron_variant	NA	NA	NA	NA	NA	NA	NA	NA	NA	intron_variant	3	97306689	A	C	1.45159e-05	1	172225	ADD	4.51542	1.42664	10.0177	2.80955	NA	CD
3:97309152:C:T	3	97309152	C	T	EPHA6	intron_variant	intron_variant	modifier	intron_variant	NA	NA	NA	NA	NA	NA	NA	NA	NA	intron_variant	3	97309152	C	T	8.70954e-06	1	172225	ADD	4.41712	1.44045	9.40339	2.66437	NA	CD
3:97309160:ATGTAT:A	3	97309160	ATGTAT	A	EPHA6	intron_variant	intron_variant	modifier	intron_variant	NA	NA	NA	NA	NA	NA	NA	NA	NA	intron_variant	3	97309160	ATGTAT	A	1.16127e-05	1	172225	ADD	3.64323	1.34693	7.31621	2.16535	NA	UC
3:97311058:G:C	3	97311058	G	C	EPHA6	intron_variant	intron_variant	modifier	intron_variant	NA	NA	NA	NA	NA	NA	NA	NA	NA	intron_variant	3	97311058	G	C	0.000110321	1	172225	ADD	2.6886	0.922324	8.4974	2.44897	NA	CD
3:97311292:T:G	3	97311292	T	G	EPHA6	intron_variant	intron_variant	modifier	intron_variant	NA	NA	NA	NA	NA	NA	NA	NA	NA	intron_variant	3	97311292	T	G	8.70954e-06	1	172225	ADD	3.84649	1.38634	7.69818	2.25746	NA	UC
3:97315991:G:A	3	97315991	G	A	EPHA6	intron_variant	intron_variant	modifier	intron_variant	NA	NA	NA	NA	NA	NA	NA	NA	NA	intron_variant	3	97315991	G	A	7.25795e-05	1	172225	ADD	2.4472	0.768619	10.1372	2.83771	NA	UC
3:97316293:G:T	3	97316293	G	T	EPHA6	intron_variant	intron_variant	modifier	intron_variant	NA	NA	NA	NA	NA	NA	NA	NA	NA	intron_variant	3	97316293	G	T	2.03223e-05	1	172225	ADD	3.94256	1.35624	8.45046	2.43777	NA	CD
3:97316519:TCC:T	3	97316519	TCC	T	EPHA6	intron_variant	intron_variant	modifier	intron_variant	NA	NA	NA	NA	NA	NA	NA	NA	NA	intron_variant	3	97316519	TCC	T	3.77413e-05	1	172225	ADD	3.2635	1.26494	6.65615	2.00518	NA	CD
3:97316533:T:C	3	97316533	T	C	EPHA6	intron_variant	intron_variant	modifier	intron_variant	NA	NA	NA	NA	NA	NA	NA	NA	NA	intron_variant	3	97316533	T	C	2.61286e-05	1	172225	ADD	3.29328	1.27444	6.67762	2.01041	NA	CD
3:97316558:C:G	3	97316558	C	G	EPHA6	intron_variant	intron_variant	modifier	intron_variant	NA	NA	NA	NA	NA	NA	NA	NA	NA	intron_variant	3	97316558	C	G	1.74191e-05	1	172225	ADD	3.76565	1.36226	7.64119	2.24374	NA	CD
3:97316568:T:A	3	97316568	T	A	EPHA6	intron_variant	intron_variant	modifier	intron_variant	NA	NA	NA	NA	NA	NA	NA	NA	NA	intron_variant	3	97316568	T	A	1.45159e-05	1	172225	ADD	3.55676	1.32281	7.22959	2.14441	NA	UC
3:97317069:A:G	3	97317069	A	G	EPHA6	intron_variant	intron_variant	modifier	intron_variant	NA	NA	NA	NA	NA	NA	NA	NA	NA	intron_variant	3	97317069	A	G	2.03223e-05	1	172225	ADD	3.54564	1.31073	7.31748	2.16566	NA	UC
3:97317119:C:A	3	97317119	C	A	EPHA6	intron_variant	intron_variant	modifier	intron_variant	NA	NA	NA	NA	NA	NA	NA	NA	NA	intron_variant	3	97317119	C	A	2.32254e-05	1	172225	ADD	3.64632	1.35137	7.28057	2.15674	NA	CD
3:97317253:A:G	3	97317253	A	G	EPHA6	intron_variant	intron_variant	modifier	intron_variant	NA	NA	NA	NA	NA	NA	NA	NA	NA	intron_variant	3	97317253	A	G	0.000214835	1	172225	ADD	1.67426	0.614547	7.42227	2.19097	NA	UC
3:97318647:G:A	3	97318647	G	A	EPHA6	intron_variant	intron_variant	modifier	intron_variant	NA	NA	NA	NA	NA	NA	NA	NA	NA	intron_variant	3	97318647	G	A	8.70954e-06	1	172225	ADD	4.89465	1.62282	9.09706	2.59172	NA	CD
3:97318647:G:A	3	97318647	G	A	EPHA6	intron_variant	intron_variant	modifier	intron_variant	NA	NA	NA	NA	NA	NA	NA	NA	NA	intron_variant	3	97318647	G	A	8.70954e-06	1	172225	ADD	4.56887	1.61629	7.99059	2.32771	NA	UC
3:97318678:T:C	3	97318678	T	C	EPHA6	intron_variant	intron_variant	modifier	intron_variant	NA	NA	NA	NA	NA	NA	NA	NA	NA	intron_variant	3	97318678	T	C	1.45159e-05	1	172225	ADD	3.6288	1.33076	7.43579	2.19423	NA	UC
3:97318779:C:T	3	97318779	C	T	EPHA6	intron_variant	intron_variant	modifier	intron_variant	NA	NA	NA	NA	NA	NA	NA	NA	NA	intron_variant	3	97318779	C	T	1.16127e-05	1	172225	ADD	3.95996	1.41201	7.86518	2.29761	NA	CD
3:97320054:C:T	3	97320054	C	T	EPHA6	intron_variant	intron_variant	modifier	intron_variant	NA	NA	NA	NA	NA	NA	NA	NA	NA	intron_variant	3	97320054	C	T	0.000101611	1	172225	ADD	2.75015	0.644102	18.2306	4.70839	NA	UC
3:97321025:A:AT	3	97321025	A	AT	EPHA6	intron_variant	intron_variant	modifier	intron_variant	NA	NA	NA	NA	NA	NA	NA	NA	NA	intron_variant	3	97321025	A	AT	8.70954e-06	1	172225	ADD	4.16019	1.43645	8.38774	2.42278	NA	UC
3:97321633:A:C	3	97321633	A	C	EPHA6	intron_variant	intron_variant	modifier	intron_variant	NA	NA	NA	NA	NA	NA	NA	NA	NA	intron_variant	3	97321633	A	C	1.74191e-05	1	172225	ADD	3.83044	1.35353	8.00874	2.33206	NA	UC
3:97321633:A:C	3	97321633	A	C	EPHA6	intron_variant	intron_variant	modifier	intron_variant	NA	NA	NA	NA	NA	NA	NA	NA	NA	intron_variant	3	97321633	A	C	1.74191e-05	1	172225	ADD	3.78984	1.38026	7.53912	2.21915	NA	CD
3:97322021:G:A	3	97322021	G	A	EPHA6	intron_variant	intron_variant	modifier	intron_variant	NA	NA	NA	NA	NA	NA	NA	NA	NA	intron_variant	3	97322021	G	A	8.70954e-06	1	172225	ADD	4.24397	1.45317	8.52928	2.45658	NA	UC
3:97322456:T:C	3	97322456	T	C	EPHA6	intron_variant	intron_variant	modifier	intron_variant	NA	NA	NA	NA	NA	NA	NA	NA	NA	intron_variant	3	97322456	T	C	0.000232254	1	172225	ADD	1.61906	0.609561	7.05491	2.10211	NA	UC
3:97323409:A:G	3	97323409	A	G	EPHA6	intron_variant	intron_variant	modifier	intron_variant	NA	NA	NA	NA	NA	NA	NA	NA	NA	intron_variant	3	97323409	A	G	2.61286e-05	1	172225	ADD	3.35924	1.28976	6.78373	2.03625	NA	CD
3:97324138:T:C	3	97324138	T	C	EPHA6	intron_variant	intron_variant	modifier	intron_variant	NA	NA	NA	NA	NA	NA	NA	NA	NA	intron_variant	3	97324138	T	C	3.1935e-05	1	172225	ADD	3.87463	1.33495	8.4242	2.43149	NA	CD
3:97324847:TAA:T	3	97324847	TAA	T	EPHA6	intron_variant	intron_variant	modifier	intron_variant	NA	NA	NA	NA	NA	NA	NA	NA	NA	intron_variant	3	97324847	TAA	T	1.16127e-05	1	172225	ADD	3.53874	1.34329	6.93992	2.07421	NA	UC
3:97324847:TAA:T	3	97324847	TAA	T	EPHA6	intron_variant	intron_variant	modifier	intron_variant	NA	NA	NA	NA	NA	NA	NA	NA	NA	intron_variant	3	97324847	TAA	T	1.16127e-05	1	172225	ADD	3.87764	1.3876	7.80915	2.28414	NA	CD
3:97326481:T:C	3	97326481	T	C	EPHA6	intron_variant	intron_variant	modifier	intron_variant	NA	NA	NA	NA	NA	NA	NA	NA	NA	intron_variant	3	97326481	T	C	1.74191e-05	1	172225	ADD	3.7572	1.3483	7.76523	2.27359	NA	CD
3:97326566:A:G	3	97326566	A	G	EPHA6	intron_variant	intron_variant	modifier	intron_variant	NA	NA	NA	NA	NA	NA	NA	NA	NA	intron_variant	3	97326566	A	G	3.77413e-05	1	172225	ADD	3.29863	1.06255	9.63755	2.71979	NA	CD
3:97326566:A:G	3	97326566	A	G	EPHA6	intron_variant	intron_variant	modifier	intron_variant	NA	NA	NA	NA	NA	NA	NA	NA	NA	intron_variant	3	97326566	A	G	3.77413e-05	1	172225	ADD	2.75855	0.960436	8.24946	2.38972	NA	UC
3:97326858:G:A	3	97326858	G	A	EPHA6	intron_variant	intron_variant	modifier	intron_variant	NA	NA	NA	NA	NA	NA	NA	NA	NA	intron_variant	3	97326858	G	A	2.90318e-05	1	172225	ADD	3.44514	1.3079	6.93845	2.07385	NA	CD
3:97337063:T:C	3	97337063	T	C	EPHA6	intron_variant	intron_variant	modifier	intron_variant	NA	NA	NA	NA	NA	NA	NA	NA	NA	intron_variant	3	97337063	T	C	0.000284512	1	172225	ADD	1.8159	0.703816	6.65683	2.00535	NA	CD
3:97337174:G:T	3	97337174	G	T	EPHA6	intron_variant	intron_variant	modifier	intron_variant	NA	NA	NA	NA	NA	NA	NA	NA	NA	intron_variant	3	97337174	G	T	2.03223e-05	1	172225	ADD	3.41445	1.29809	6.91875	2.06907	NA	CD
3:97337304:T:C	3	97337304	T	C	EPHA6	intron_variant	intron_variant	modifier	intron_variant	NA	NA	NA	NA	NA	NA	NA	NA	NA	intron_variant	3	97337304	T	C	1.45159e-05	1	172225	ADD	3.96489	1.36722	8.40974	2.42804	NA	CD
3:97337398:C:T	3	97337398	C	T	EPHA6	intron_variant	intron_variant	modifier	intron_variant	NA	NA	NA	NA	NA	NA	NA	NA	NA	intron_variant	3	97337398	C	T	1.16127e-05	1	172225	ADD	4.302	1.42537	9.10937	2.59465	NA	CD
3:97339301:A:G	3	97339301	A	G	EPHA6	intron_variant	intron_variant	modifier	intron_variant	NA	NA	NA	NA	NA	NA	NA	NA	NA	intron_variant	3	97339301	A	G	2.32254e-05	1	172225	ADD	3.41404	1.29823	6.9157	2.06833	NA	CD
3:97339307:A:G	3	97339307	A	G	EPHA6	intron_variant	intron_variant	modifier	intron_variant	NA	NA	NA	NA	NA	NA	NA	NA	NA	intron_variant	3	97339307	A	G	8.70954e-06	1	172225	ADD	3.85999	1.41777	7.4124	2.18859	NA	UC
3:97339901:T:C	3	97339901	T	C	EPHA6	intron_variant	intron_variant	modifier	intron_variant	NA	NA	NA	NA	NA	NA	NA	NA	NA	intron_variant	3	97339901	T	C	0.000124837	1	172225	ADD	2.39741	0.899118	7.10967	2.11538	NA	CD
3:97340218:A:C	3	97340218	A	C	EPHA6	intron_variant	intron_variant	modifier	intron_variant	NA	NA	NA	NA	NA	NA	NA	NA	NA	intron_variant	3	97340218	A	C	2.32254e-05	1	172225	ADD	3.69145	1.32232	7.79333	2.28034	NA	CD
3:97341249:G:A	3	97341249	G	A	EPHA6	intron_variant	intron_variant	modifier	intron_variant	NA	NA	NA	NA	NA	NA	NA	NA	NA	intron_variant	3	97341249	G	A	1.16127e-05	1	172225	ADD	4.33216	1.42522	9.23948	2.62552	NA	UC
3:97341653:T:C	3	97341653	T	C	EPHA6	intron_variant	intron_variant	modifier	intron_variant	NA	NA	NA	NA	NA	NA	NA	NA	NA	intron_variant	3	97341653	T	C	1.45159e-05	1	172225	ADD	3.45264	1.31485	6.8952	2.06335	NA	UC
3:97341682:A:G	3	97341682	A	G	EPHA6	intron_variant	intron_variant	modifier	intron_variant	NA	NA	NA	NA	NA	NA	NA	NA	NA	intron_variant	3	97341682	A	G	3.1935e-05	1	172225	ADD	2.86434	0.965054	8.80939	2.52334	NA	UC
3:97341704:T:C	3	97341704	T	C	EPHA6	intron_variant	intron_variant	modifier	intron_variant	NA	NA	NA	NA	NA	NA	NA	NA	NA	intron_variant	3	97341704	T	C	4.06445e-05	1	172225	ADD	2.77826	0.94721	8.60307	2.47418	NA	UC
3:97342075:G:A	3	97342075	G	A	EPHA6	intron_variant	intron_variant	modifier	intron_variant	NA	NA	NA	NA	NA	NA	NA	NA	NA	intron_variant	3	97342075	G	A	1.74191e-05	1	172225	ADD	3.74521	1.33972	7.8149	2.28553	NA	CD
3:97342522:A:T	3	97342522	A	T	EPHA6	intron_variant	intron_variant	modifier	intron_variant	NA	NA	NA	NA	NA	NA	NA	NA	NA	intron_variant	3	97342522	A	T	2.32254e-05	1	172225	ADD	3.9683	1.37388	8.34281	2.41205	NA	CD
3:97344850:A:G	3	97344850	A	G	EPHA6	intron_variant	intron_variant	modifier	intron_variant	NA	NA	NA	NA	NA	NA	NA	NA	NA	intron_variant	3	97344850	A	G	0.000281608	1	172225	ADD	1.8745	0.708176	7.00628	2.09031	NA	CD
3:97344990:A:C	3	97344990	A	C	EPHA6	intron_variant	intron_variant	modifier	intron_variant	NA	NA	NA	NA	NA	NA	NA	NA	NA	intron_variant	3	97344990	A	C	1.16127e-05	1	172225	ADD	4.44102	1.18965	13.9356	3.72313	NA	UC
3:97344990:A:C	3	97344990	A	C	EPHA6	intron_variant	intron_variant	modifier	intron_variant	NA	NA	NA	NA	NA	NA	NA	NA	NA	intron_variant	3	97344990	A	C	1.16127e-05	1	172225	ADD	4.3572	1.4447	9.09619	2.59152	NA	CD
3:97345049:G:T	3	97345049	G	T	EPHA6	intron_variant	intron_variant	modifier	intron_variant	NA	NA	NA	NA	NA	NA	NA	NA	NA	intron_variant	3	97345049	G	T	8.70954e-06	1	172225	ADD	3.51678	1.34718	6.81454	2.04374	NA	UC
3:97345192:T:G	3	97345192	T	G	EPHA6	intron_variant	intron_variant	modifier	intron_variant	NA	NA	NA	NA	NA	NA	NA	NA	NA	intron_variant	3	97345192	T	G	2.32254e-05	1	172225	ADD	3.71476	1.35152	7.55464	2.22289	NA	CD
3:97345588:G:T	3	97345588	G	T	EPHA6	intron_variant	intron_variant	modifier	intron_variant	NA	NA	NA	NA	NA	NA	NA	NA	NA	intron_variant	3	97345588	G	T	2.90318e-05	1	172225	ADD	2.7676	0.966486	8.20002	2.37789	NA	UC
3:97345769:T:G	3	97345769	T	G	EPHA6	intron_variant	intron_variant	modifier	intron_variant	NA	NA	NA	NA	NA	NA	NA	NA	NA	intron_variant	3	97345769	T	G	2.03223e-05	1	172225	ADD	3.73961	1.34305	7.75298	2.27064	NA	CD
3:97346253:G:A	3	97346253	G	A	EPHA6	intron_variant	intron_variant	modifier	intron_variant	NA	NA	NA	NA	NA	NA	NA	NA	NA	intron_variant	3	97346253	G	A	8.70954e-06	1	172225	ADD	4.6042	1.47471	9.74751	2.74578	NA	UC
3:97346286:G:C	3	97346286	G	C	EPHA6	intron_variant	intron_variant	modifier	intron_variant	NA	NA	NA	NA	NA	NA	NA	NA	NA	intron_variant	3	97346286	G	C	1.16127e-05	1	172225	ADD	3.80483	1.38328	7.56571	2.22556	NA	UC
3:97347174:C:T	3	97347174	C	T	EPHA6	intron_variant	intron_variant	modifier	intron_variant	NA	NA	NA	NA	NA	NA	NA	NA	NA	intron_variant	3	97347174	C	T	4.9354e-05	1	172225	ADD	3.67046	1.02874	12.73	3.4439	NA	CD
3:97347584:T:C	3	97347584	T	C	EPHA6	intron_variant	intron_variant	modifier	intron_variant	NA	NA	NA	NA	NA	NA	NA	NA	NA	intron_variant	3	97347584	T	C	1.45159e-05	1	172225	ADD	3.47173	1.32155	6.90122	2.06481	NA	CD
3:97348374:G:A	3	97348374	G	A	EPHA6	intron_variant	intron_variant	modifier	intron_variant	NA	NA	NA	NA	NA	NA	NA	NA	NA	intron_variant	3	97348374	G	A	4.35477e-05	1	172225	ADD	2.80822	0.973756	8.31688	2.40585	NA	CD
3:97348886:GTTC:G	3	97348886	GTTC	G	EPHA6	intron_variant	intron_variant	modifier	intron_variant	NA	NA	NA	NA	NA	NA	NA	NA	NA	intron_variant	3	97348886	GTTC	G	1.74191e-05	1	172225	ADD	3.47942	1.34827	6.65976	2.00606	NA	UC
3:97349030:C:T	3	97349030	C	T	EPHA6	intron_variant	intron_variant	modifier	intron_variant	NA	NA	NA	NA	NA	NA	NA	NA	NA	intron_variant	3	97349030	C	T	2.32254e-05	1	172225	ADD	3.40468	1.29163	6.94826	2.07623	NA	UC
3:97349763:C:T	3	97349763	C	T	EPHA6	intron_variant	intron_variant	modifier	intron_variant	NA	NA	NA	NA	NA	NA	NA	NA	NA	intron_variant	3	97349763	C	T	1.74191e-05	1	172225	ADD	3.66203	1.35492	7.30491	2.16262	NA	UC
3:97351086:T:C	3	97351086	T	C	EPHA6	intron_variant	intron_variant	modifier	intron_variant	NA	NA	NA	NA	NA	NA	NA	NA	NA	intron_variant	3	97351086	T	C	6.09668e-05	1	172225	ADD	2.39697	0.911162	6.92044	2.06948	NA	UC
3:97351195:G:A	3	97351195	G	A	EPHA6	intron_variant	intron_variant	modifier	intron_variant	NA	NA	NA	NA	NA	NA	NA	NA	NA	intron_variant	3	97351195	G	A	2.32254e-05	1	172225	ADD	3.94198	1.38322	8.12167	2.35913	NA	CD
3:97351420:G:T	3	97351420	G	T	EPHA6	intron_variant	intron_variant	modifier	intron_variant	NA	NA	NA	NA	NA	NA	NA	NA	NA	intron_variant	3	97351420	G	T	2.90318e-05	1	172225	ADD	3.18983	0.992488	10.3296	2.88302	NA	UC
3:97351648:A:G	3	97351648	A	G	EPHA6	intron_variant	intron_variant	modifier	intron_variant	NA	NA	NA	NA	NA	NA	NA	NA	NA	intron_variant	3	97351648	A	G	1.16127e-05	1	172225	ADD	4.80954	1.53164	9.86039	2.77243	NA	CD
3:97351774:G:A	3	97351774	G	A	EPHA6	intron_variant	intron_variant	modifier	intron_variant	NA	NA	NA	NA	NA	NA	NA	NA	NA	intron_variant	3	97351774	G	A	1.45159e-05	1	172225	ADD	3.68105	1.34423	7.49885	2.20945	NA	CD
3:97360823:G:A	3	97360823	G	A	EPHA6	intron_variant	intron_variant	modifier	intron_variant	NA	NA	NA	NA	NA	NA	NA	NA	NA	intron_variant	3	97360823	G	A	8.70954e-06	1	172225	ADD	4.14056	1.48481	7.77638	2.27627	NA	UC
3:97360906:C:A	3	97360906	C	A	EPHA6	intron_variant	intron_variant	modifier	intron_variant	NA	NA	NA	NA	NA	NA	NA	NA	NA	intron_variant	3	97360906	C	A	0.000235157	1	172225	ADD	1.53093	0.58954	6.74348	2.02645	NA	UC
3:97361181:G:A	3	97361181	G	A	EPHA6	intron_variant	intron_variant	modifier	intron_variant	NA	NA	NA	NA	NA	NA	NA	NA	NA	intron_variant	3	97361181	G	A	3.77413e-05	1	172225	ADD	4.02778	1.07082	14.1483	3.77223	NA	CD
3:97362379:T:G	3	97362379	T	G	EPHA6	intron_variant	intron_variant	modifier	intron_variant	NA	NA	NA	NA	NA	NA	NA	NA	NA	intron_variant	3	97362379	T	G	3.77413e-05	1	172225	ADD	2.52563	0.928951	7.39185	2.18363	NA	UC
3:97362663:A:G	3	97362663	A	G	EPHA6	intron_variant	intron_variant	modifier	intron_variant	NA	NA	NA	NA	NA	NA	NA	NA	NA	intron_variant	3	97362663	A	G	1.74191e-05	1	172225	ADD	3.841	1.38399	7.70239	2.25847	NA	CD
3:97362739:A:G	3	97362739	A	G	EPHA6	intron_variant	intron_variant	modifier	intron_variant	NA	NA	NA	NA	NA	NA	NA	NA	NA	intron_variant	3	97362739	A	G	8.70954e-06	1	172225	ADD	3.75533	1.3618	7.60452	2.23491	NA	UC
3:97362813:T:C	3	97362813	T	C	EPHA6	intron_variant	intron_variant	modifier	intron_variant	NA	NA	NA	NA	NA	NA	NA	NA	NA	intron_variant	3	97362813	T	C	1.16127e-05	1	172225	ADD	4.3766	1.43482	9.30422	2.64087	NA	UC
3:97362813:T:C	3	97362813	T	C	EPHA6	intron_variant	intron_variant	modifier	intron_variant	NA	NA	NA	NA	NA	NA	NA	NA	NA	intron_variant	3	97362813	T	C	1.16127e-05	1	172225	ADD	4.90869	1.50775	10.5992	2.94639	NA	CD
3:97364530:A:G	3	97364530	A	G	EPHA6	intron_variant	intron_variant	modifier	intron_variant	NA	NA	NA	NA	NA	NA	NA	NA	NA	intron_variant	3	97364530	A	G	8.70954e-06	1	172225	ADD	3.99431	1.3952	8.19617	2.37697	NA	UC
3:97365907:A:G	3	97365907	A	G	EPHA6	intron_variant	intron_variant	modifier	intron_variant	NA	NA	NA	NA	NA	NA	NA	NA	NA	intron_variant	3	97365907	A	G	8.70954e-06	1	172225	ADD	4.08615	1.40544	8.45288	2.43834	NA	UC
3:97365930:T:A	3	97365930	T	A	EPHA6	intron_variant	intron_variant	modifier	intron_variant	NA	NA	NA	NA	NA	NA	NA	NA	NA	intron_variant	3	97365930	T	A	8.70954e-06	1	172225	ADD	3.81977	1.37584	7.7079	2.2598	NA	UC
3:97366491:G:T	3	97366491	G	T	EPHA6	intron_variant	intron_variant	modifier	intron_variant	NA	NA	NA	NA	NA	NA	NA	NA	NA	intron_variant	3	97366491	G	T	1.74191e-05	1	172225	ADD	3.66203	1.35492	7.30491	2.16262	NA	UC
3:97366814:G:C	3	97366814	G	C	EPHA6	intron_variant	intron_variant	modifier	intron_variant	NA	NA	NA	NA	NA	NA	NA	NA	NA	intron_variant	3	97366814	G	C	8.70954e-06	1	172225	ADD	4.73278	1.47712	10.266	2.86806	NA	UC
3:97366829:C:T	3	97366829	C	T	EPHA6	intron_variant	intron_variant	modifier	intron_variant	NA	NA	NA	NA	NA	NA	NA	NA	NA	intron_variant	3	97366829	C	T	1.45159e-05	1	172225	ADD	4.20652	1.41327	8.85923	2.5352	NA	CD
3:97367253:T:C	3	97367253	T	C	EPHA6	intron_variant	intron_variant	modifier	intron_variant	NA	NA	NA	NA	NA	NA	NA	NA	NA	intron_variant	3	97367253	T	C	2.03223e-05	1	172225	ADD	3.63745	1.384	6.90748	2.06633	NA	CD
3:97369587:C:T	3	97369587	C	T	EPHA6	intron_variant	intron_variant	modifier	intron_variant	NA	NA	NA	NA	NA	NA	NA	NA	NA	intron_variant	3	97369587	C	T	8.70954e-06	1	172225	ADD	4.77953	1.48344	10.3808	2.89505	NA	CD
3:97369998:A:C	3	97369998	A	C	EPHA6	intron_variant	intron_variant	modifier	intron_variant	NA	NA	NA	NA	NA	NA	NA	NA	NA	intron_variant	3	97369998	A	C	1.45159e-05	1	172225	ADD	3.63367	1.37771	6.95627	2.07818	NA	UC
3:97371211:T:C	3	97371211	T	C	EPHA6	intron_variant	intron_variant	modifier	intron_variant	NA	NA	NA	NA	NA	NA	NA	NA	NA	intron_variant	3	97371211	T	C	1.16127e-05	1	172225	ADD	4.0688	1.38445	8.63728	2.48234	NA	CD
3:97373323:A:G	3	97373323	A	G	EPHA6	intron_variant	intron_variant	modifier	intron_variant	NA	NA	NA	NA	NA	NA	NA	NA	NA	intron_variant	3	97373323	A	G	3.77413e-05	1	172225	ADD	3.43381	1.02501	11.2226	3.09255	NA	CD
3:97373740:A:G	3	97373740	A	G	EPHA6	intron_variant	intron_variant	modifier	intron_variant	NA	NA	NA	NA	NA	NA	NA	NA	NA	intron_variant	3	97373740	A	G	2.03223e-05	1	172225	ADD	3.58606	1.34202	7.14033	2.12281	NA	UC
3:97374391:G:A	3	97374391	G	A	EPHA6	intron_variant	intron_variant	modifier	intron_variant	NA	NA	NA	NA	NA	NA	NA	NA	NA	intron_variant	3	97374391	G	A	3.48381e-05	1	172225	ADD	2.88839	0.959821	9.05591	2.58195	NA	UC
3:97375104:G:C	3	97375104	G	C	EPHA6	intron_variant	intron_variant	modifier	intron_variant	NA	NA	NA	NA	NA	NA	NA	NA	NA	intron_variant	3	97375104	G	C	1.74191e-05	1	172225	ADD	4.01516	1.3747	8.53074	2.45693	NA	CD
3:97379882:G:GA	3	97379882	G	GA	EPHA6	intron_variant	intron_variant	modifier	intron_variant	NA	NA	NA	NA	NA	NA	NA	NA	NA	intron_variant	3	97379882	G	GA	8.70954e-06	1	172225	ADD	3.89418	1.40002	7.73688	2.26677	NA	UC
3:97380006:A:G	3	97380006	A	G	EPHA6	intron_variant	intron_variant	modifier	intron_variant	NA	NA	NA	NA	NA	NA	NA	NA	NA	intron_variant	3	97380006	A	G	0.000113224	1	172225	ADD	2.30672	0.752649	9.393	2.66191	NA	UC
3:97380783:AAT:A	3	97380783	AAT	A	EPHA6	intron_variant	intron_variant	modifier	intron_variant	NA	NA	NA	NA	NA	NA	NA	NA	NA	intron_variant	3	97380783	AAT	A	1.16127e-05	1	172225	ADD	3.79237	1.36286	7.74322	2.26829	NA	CD
3:97381840:A:G	3	97381840	A	G	EPHA6	intron_variant	intron_variant	modifier	intron_variant	NA	NA	NA	NA	NA	NA	NA	NA	NA	intron_variant	3	97381840	A	G	8.70954e-06	1	172225	ADD	4.83373	1.51462	10.1849	2.84895	NA	CD
3:97383025:A:G	3	97383025	A	G	EPHA6	intron_variant	intron_variant	modifier	intron_variant	NA	NA	NA	NA	NA	NA	NA	NA	NA	intron_variant	3	97383025	A	G	0.000226448	1	172225	ADD	1.68213	0.614111	7.5028	2.2104	NA	UC
3:97383809:C:A	3	97383809	C	A	EPHA6	intron_variant	intron_variant	modifier	intron_variant	NA	NA	NA	NA	NA	NA	NA	NA	NA	intron_variant	3	97383809	C	A	2.90318e-05	1	172225	ADD	3.32843	1.27487	6.81624	2.04415	NA	CD
3:97384145:C:T	3	97384145	C	T	EPHA6	intron_variant	intron_variant	modifier	intron_variant	NA	NA	NA	NA	NA	NA	NA	NA	NA	intron_variant	3	97384145	C	T	2.03223e-05	1	172225	ADD	3.54238	1.31013	7.31072	2.16403	NA	UC
3:97384146:G:A	3	97384146	G	A	EPHA6	intron_variant	intron_variant	modifier	intron_variant	NA	NA	NA	NA	NA	NA	NA	NA	NA	intron_variant	3	97384146	G	A	1.74191e-05	1	172225	ADD	4.0963	1.39152	8.66569	2.48911	NA	CD
3:97385308:A:G	3	97385308	A	G	EPHA6	intron_variant	intron_variant	modifier	intron_variant	NA	NA	NA	NA	NA	NA	NA	NA	NA	intron_variant	3	97385308	A	G	8.70954e-06	1	172225	ADD	4.30201	1.51446	8.06909	2.34653	NA	UC
3:97388956:C:A	3	97388956	C	A	EPHA6	intron_variant	intron_variant	modifier	intron_variant	NA	NA	NA	NA	NA	NA	NA	NA	NA	intron_variant	3	97388956	C	A	3.1935e-05	1	172225	ADD	2.86434	0.965054	8.80939	2.52334	NA	UC
3:97389354:T:G	3	97389354	T	G	EPHA6	intron_variant	intron_variant	modifier	intron_variant	NA	NA	NA	NA	NA	NA	NA	NA	NA	intron_variant	3	97389354	T	G	0.000223545	1	172225	ADD	1.6996	0.615631	7.62167	2.23904	NA	UC
3:97389405:C:T	3	97389405	C	T	EPHA6	intron_variant	intron_variant	modifier	intron_variant	NA	NA	NA	NA	NA	NA	NA	NA	NA	intron_variant	3	97389405	C	T	8.70954e-06	1	172225	ADD	3.91767	1.43642	7.43859	2.19491	NA	UC
3:97389405:C:T	3	97389405	C	T	EPHA6	intron_variant	intron_variant	modifier	intron_variant	NA	NA	NA	NA	NA	NA	NA	NA	NA	intron_variant	3	97389405	C	T	8.70954e-06	1	172225	ADD	4.6221	1.51329	9.32905	2.64676	NA	CD
3:97389454:A:G	3	97389454	A	G	EPHA6	intron_variant	intron_variant	modifier	intron_variant	NA	NA	NA	NA	NA	NA	NA	NA	NA	intron_variant	3	97389454	A	G	3.1935e-05	1	172225	ADD	3.36145	1.28096	6.88628	2.06118	NA	CD
3:97389960:A:G	3	97389960	A	G	EPHA6	intron_variant	intron_variant	modifier	intron_variant	NA	NA	NA	NA	NA	NA	NA	NA	NA	intron_variant	3	97389960	A	G	1.45159e-05	1	172225	ADD	3.58854	1.33742	7.19943	2.13711	NA	CD
3:97390500:C:A	3	97390500	C	A	EPHA6	intron_variant	intron_variant	modifier	intron_variant	NA	NA	NA	NA	NA	NA	NA	NA	NA	intron_variant	3	97390500	C	A	3.77413e-05	1	172225	ADD	3.94627	1.34243	8.64153	2.48335	NA	CD
3:97390789:TGGGATGGAGGCCCTACAA:T	3	97390789	TGGGATGGAGGCCCTACAA	T	EPHA6	intron_variant	intron_variant	modifier	intron_variant	NA	NA	NA	NA	NA	NA	NA	NA	NA	intron_variant	3	97390789	TGGGATGGAGGCCCTACAA	T	1.16127e-05	1	172225	ADD	4.1928	1.12316	13.9357	3.72313	NA	UC
3:97392188:A:G	3	97392188	A	G	EPHA6	intron_variant	intron_variant	modifier	intron_variant	NA	NA	NA	NA	NA	NA	NA	NA	NA	intron_variant	3	97392188	A	G	1.16127e-05	1	172225	ADD	4.64586	1.44869	10.2845	2.8724	NA	CD
3:97393209:A:G	3	97393209	A	G	EPHA6	intron_variant	intron_variant	modifier	intron_variant	NA	NA	NA	NA	NA	NA	NA	NA	NA	intron_variant	3	97393209	A	G	8.70954e-06	1	172225	ADD	3.90773	1.37659	8.05826	2.34393	NA	UC
3:97393229:G:A	3	97393229	G	A	EPHA6	intron_variant	intron_variant	modifier	intron_variant	NA	NA	NA	NA	NA	NA	NA	NA	NA	intron_variant	3	97393229	G	A	1.45159e-05	1	172225	ADD	4.33526	1.41461	9.39206	2.66169	NA	CD
3:97395136:A:G	3	97395136	A	G	EPHA6	intron_variant	intron_variant	modifier	intron_variant	NA	NA	NA	NA	NA	NA	NA	NA	NA	intron_variant	3	97395136	A	G	1.16127e-05	1	172225	ADD	3.66777	1.38577	7.00516	2.09004	NA	CD
3:97396377:C:A	3	97396377	C	A	EPHA6	intron_variant	intron_variant	modifier	intron_variant	NA	NA	NA	NA	NA	NA	NA	NA	NA	intron_variant	3	97396377	C	A	1.45159e-05	1	172225	ADD	4.49329	1.14653	15.3588	4.05108	NA	UC
3:97396854:C:A	3	97396854	C	A	EPHA6	intron_variant	intron_variant	modifier	intron_variant	NA	NA	NA	NA	NA	NA	NA	NA	NA	intron_variant	3	97396854	C	A	1.45159e-05	1	172225	ADD	3.41522	1.30325	6.86727	2.05656	NA	UC
3:97397629:T:C	3	97397629	T	C	EPHA6	intron_variant	intron_variant	modifier	intron_variant	NA	NA	NA	NA	NA	NA	NA	NA	NA	intron_variant	3	97397629	T	C	1.74191e-05	1	172225	ADD	4.40231	1.40503	9.81721	2.76224	NA	CD
3:97398311:T:A	3	97398311	T	A	EPHA6	intron_variant	intron_variant	modifier	intron_variant	NA	NA	NA	NA	NA	NA	NA	NA	NA	intron_variant	3	97398311	T	A	1.74191e-05	1	172225	ADD	3.89973	1.36084	8.21215	2.38079	NA	CD
3:97398326:A:C	3	97398326	A	C	EPHA6	intron_variant	intron_variant	modifier	intron_variant	NA	NA	NA	NA	NA	NA	NA	NA	NA	intron_variant	3	97398326	A	C	8.70954e-06	1	172225	ADD	4.49155	1.47373	9.28868	2.63719	NA	UC
3:97398509:T:C	3	97398509	T	C	EPHA6	intron_variant	intron_variant	modifier	intron_variant	NA	NA	NA	NA	NA	NA	NA	NA	NA	intron_variant	3	97398509	T	C	1.45159e-05	1	172225	ADD	3.50726	1.33467	6.90541	2.06583	NA	UC
3:97398587:T:C	3	97398587	T	C	EPHA6	intron_variant	intron_variant	modifier	intron_variant	NA	NA	NA	NA	NA	NA	NA	NA	NA	intron_variant	3	97398587	T	C	1.45159e-05	1	172225	ADD	3.97747	1.36198	8.52853	2.4564	NA	UC
3:97402592:G:A	3	97402592	G	A	EPHA6	intron_variant	intron_variant	modifier	intron_variant	NA	NA	NA	NA	NA	NA	NA	NA	NA	intron_variant	3	97402592	G	A	1.74191e-05	1	172225	ADD	3.72597	1.36511	7.44981	2.19762	NA	CD
3:97402659:T:C	3	97402659	T	C	EPHA6	intron_variant	intron_variant	modifier	intron_variant	NA	NA	NA	NA	NA	NA	NA	NA	NA	intron_variant	3	97402659	T	C	1.45159e-05	1	172225	ADD	3.4103	1.31697	6.7055	2.0172	NA	CD
3:97402873:G:T	3	97402873	G	T	EPHA6	intron_variant	intron_variant	modifier	intron_variant	NA	NA	NA	NA	NA	NA	NA	NA	NA	intron_variant	3	97402873	G	T	4.9354e-05	1	172225	ADD	2.37317	0.911699	6.77571	2.0343	NA	UC
3:97402973:C:A	3	97402973	C	A	EPHA6	intron_variant	intron_variant	modifier	intron_variant	NA	NA	NA	NA	NA	NA	NA	NA	NA	intron_variant	3	97402973	C	A	8.70959e-06	1	172224	ADD	4.47708	1.43571	9.72422	2.74027	NA	UC
3:97404430:T:G	3	97404430	T	G	EPHA6	intron_variant	intron_variant	modifier	intron_variant	NA	NA	NA	NA	NA	NA	NA	NA	NA	intron_variant	3	97404430	T	G	1.74191e-05	1	172225	ADD	3.82354	1.34779	8.04798	2.34147	NA	UC
3:97404825:T:C	3	97404825	T	C	EPHA6	intron_variant	intron_variant	modifier	intron_variant	NA	NA	NA	NA	NA	NA	NA	NA	NA	intron_variant	3	97404825	T	C	8.70954e-06	1	172225	ADD	4.51173	1.48873	9.1844	2.61246	NA	CD
3:97404890:T:G	3	97404890	T	G	EPHA6	intron_variant	intron_variant	modifier	intron_variant	NA	NA	NA	NA	NA	NA	NA	NA	NA	intron_variant	3	97404890	T	G	8.70954e-06	1	172225	ADD	3.72178	1.38268	7.24527	2.1482	NA	UC
3:97405903:A:G	3	97405903	A	G	EPHA6	intron_variant	intron_variant	modifier	intron_variant	NA	NA	NA	NA	NA	NA	NA	NA	NA	intron_variant	3	97405903	A	G	2.61286e-05	1	172225	ADD	3.35669	1.27971	6.88024	2.05971	NA	CD
3:97406053:A:G	3	97406053	A	G	EPHA6	intron_variant	intron_variant	modifier	intron_variant	NA	NA	NA	NA	NA	NA	NA	NA	NA	intron_variant	3	97406053	A	G	5.51604e-05	1	172225	ADD	3.24538	0.836945	15.0362	3.97687	NA	UC
3:97406057:T:A	3	97406057	T	A	EPHA6	intron_variant	intron_variant	modifier	intron_variant	NA	NA	NA	NA	NA	NA	NA	NA	NA	intron_variant	3	97406057	T	A	8.70954e-06	1	172225	ADD	3.65542	1.37269	7.09131	2.11093	NA	UC
3:97407893:C:A	3	97407893	C	A	EPHA6	intron_variant	intron_variant	modifier	intron_variant	NA	NA	NA	NA	NA	NA	NA	NA	NA	intron_variant	3	97407893	C	A	4.64509e-05	1	172225	ADD	2.83993	0.961853	8.7176	2.50148	NA	UC
3:97409147:T:C	3	97409147	T	C	EPHA6	intron_variant	intron_variant	modifier	intron_variant	NA	NA	NA	NA	NA	NA	NA	NA	NA	intron_variant	3	97409147	T	C	1.16127e-05	1	172225	ADD	4.22742	1.42913	8.74996	2.50919	NA	UC
3:97409147:T:C	3	97409147	T	C	EPHA6	intron_variant	intron_variant	modifier	intron_variant	NA	NA	NA	NA	NA	NA	NA	NA	NA	intron_variant	3	97409147	T	C	1.16127e-05	1	172225	ADD	4.38662	1.5814	7.69443	2.25656	NA	CD
3:97410317:G:A	3	97410317	G	A	EPHA6	intron_variant	intron_variant	modifier	intron_variant	NA	NA	NA	NA	NA	NA	NA	NA	NA	intron_variant	3	97410317	G	A	0.000150965	1	172225	ADD	1.88331	0.713681	6.96363	2.07997	NA	UC
3:97410501:A:C	3	97410501	A	C	EPHA6	intron_variant	intron_variant	modifier	intron_variant	NA	NA	NA	NA	NA	NA	NA	NA	NA	intron_variant	3	97410501	A	C	8.70954e-06	1	172225	ADD	4.45052	1.43459	9.62428	2.71665	NA	UC
3:97410847:A:G	3	97410847	A	G	EPHA6	intron_variant	intron_variant	modifier	intron_variant	NA	NA	NA	NA	NA	NA	NA	NA	NA	intron_variant	3	97410847	A	G	8.70954e-06	1	172225	ADD	3.95818	1.3948	8.05314	2.34271	NA	UC
3:97411270:C:G	3	97411270	C	G	EPHA6	intron_variant	intron_variant	modifier	intron_variant	NA	NA	NA	NA	NA	NA	NA	NA	NA	intron_variant	3	97411270	C	G	1.74191e-05	1	172225	ADD	3.84275	1.37209	7.84365	2.29243	NA	UC
3:97412623:A:G	3	97412623	A	G	EPHA6	intron_variant	intron_variant	modifier	intron_variant	NA	NA	NA	NA	NA	NA	NA	NA	NA	intron_variant	3	97412623	A	G	0.000200319	1	172225	ADD	1.91233	0.631913	9.15819	2.60624	NA	UC
3:97414152:G:C	3	97414152	G	C	EPHA6	intron_variant	intron_variant	modifier	intron_variant	NA	NA	NA	NA	NA	NA	NA	NA	NA	intron_variant	3	97414152	G	C	1.74191e-05	1	172225	ADD	3.8422	1.35707	8.01588	2.33377	NA	CD
3:97414871:C:A	3	97414871	C	A	EPHA6	intron_variant	intron_variant	modifier	intron_variant	NA	NA	NA	NA	NA	NA	NA	NA	NA	intron_variant	3	97414871	C	A	1.16127e-05	1	172225	ADD	3.94029	1.50361	6.86729	2.05657	NA	CD
3:97414871:C:A	3	97414871	C	A	EPHA6	intron_variant	intron_variant	modifier	intron_variant	NA	NA	NA	NA	NA	NA	NA	NA	NA	intron_variant	3	97414871	C	A	1.16127e-05	1	172225	ADD	3.51185	1.33922	6.87649	2.0588	NA	UC
3:97414921:T:A	3	97414921	T	A	EPHA6	intron_variant	intron_variant	modifier	intron_variant	NA	NA	NA	NA	NA	NA	NA	NA	NA	intron_variant	3	97414921	T	A	0.000226448	1	172225	ADD	1.68213	0.614111	7.5028	2.2104	NA	UC
3:97415477:G:A	3	97415477	G	A	EPHA6	intron_variant	intron_variant	modifier	intron_variant	NA	NA	NA	NA	NA	NA	NA	NA	NA	intron_variant	3	97415477	G	A	0.00130353	1	172225	ADD	-2.37698	0.855712	7.71606	2.26176	NA	UC
3:97416058:A:AT	3	97416058	A	AT	EPHA6	intron_variant	intron_variant	modifier	intron_variant	NA	NA	NA	NA	NA	NA	NA	NA	NA	intron_variant	3	97416058	A	AT	1.16127e-05	1	172225	ADD	4.49857	1.50353	8.95204	2.55727	NA	CD
3:97420035:T:C	3	97420035	T	C	EPHA6	intron_variant	intron_variant	modifier	intron_variant	NA	NA	NA	NA	NA	NA	NA	NA	NA	intron_variant	3	97420035	T	C	1.16127e-05	1	172225	ADD	4.68115	1.45814	10.3064	2.87756	NA	UC
3:97420232:C:A	3	97420232	C	A	EPHA6	intron_variant	intron_variant	modifier	intron_variant	NA	NA	NA	NA	NA	NA	NA	NA	NA	intron_variant	3	97420232	C	A	1.74191e-05	1	172225	ADD	3.6501	1.33836	7.43812	2.19479	NA	UC
3:97422348:G:T	3	97422348	G	T	EPHA6	intron_variant	intron_variant	modifier	intron_variant	NA	NA	NA	NA	NA	NA	NA	NA	NA	intron_variant	3	97422348	G	T	1.16127e-05	1	172225	ADD	3.54583	1.34339	6.96674	2.08072	NA	UC
3:97429121:A:C	3	97429121	A	C	EPHA6	intron_variant	intron_variant	modifier	intron_variant	NA	NA	NA	NA	NA	NA	NA	NA	NA	intron_variant	3	97429121	A	C	2.03223e-05	1	172225	ADD	2.93256	0.998459	8.62648	2.47976	NA	UC
3:97429121:A:C	3	97429121	A	C	EPHA6	intron_variant	intron_variant	modifier	intron_variant	NA	NA	NA	NA	NA	NA	NA	NA	NA	intron_variant	3	97429121	A	C	2.03223e-05	1	172225	ADD	3.80276	1.35756	7.84663	2.29315	NA	CD
3:97429999:G:T	3	97429999	G	T	EPHA6	intron_variant	intron_variant	modifier	intron_variant	NA	NA	NA	NA	NA	NA	NA	NA	NA	intron_variant	3	97429999	G	T	8.70954e-06	1	172225	ADD	4.66915	1.75716	7.06084	2.10354	NA	CD
3:97430229:T:C	3	97430229	T	C	EPHA6	intron_variant	intron_variant	modifier	intron_variant	NA	NA	NA	NA	NA	NA	NA	NA	NA	intron_variant	3	97430229	T	C	2.32254e-05	1	172225	ADD	3.79788	1.34685	7.95138	2.3183	NA	CD
3:97430423:A:G	3	97430423	A	G	EPHA6	intron_variant	intron_variant	modifier	intron_variant	NA	NA	NA	NA	NA	NA	NA	NA	NA	intron_variant	3	97430423	A	G	1.16127e-05	1	172225	ADD	4.20012	1.40688	8.91273	2.54792	NA	UC
3:97431337:A:G	3	97431337	A	G	EPHA6	intron_variant	intron_variant	modifier	intron_variant	NA	NA	NA	NA	NA	NA	NA	NA	NA	intron_variant	3	97431337	A	G	8.70954e-06	1	172225	ADD	5.07769	1.72004	8.71475	2.5008	NA	CD
3:97431748:G:T	3	97431748	G	T	EPHA6	intron_variant	intron_variant	modifier	intron_variant	NA	NA	NA	NA	NA	NA	NA	NA	NA	intron_variant	3	97431748	G	T	1.74191e-05	1	172225	ADD	3.37064	1.30698	6.65101	2.00393	NA	CD
3:97433310:T:A	3	97433310	T	A	EPHA6	intron_variant	intron_variant	modifier	intron_variant	NA	NA	NA	NA	NA	NA	NA	NA	NA	intron_variant	3	97433310	T	A	8.70954e-06	1	172225	ADD	4.77953	1.48344	10.3808	2.89505	NA	CD
3:97433597:T:G	3	97433597	T	G	EPHA6	intron_variant	intron_variant	modifier	intron_variant	NA	NA	NA	NA	NA	NA	NA	NA	NA	intron_variant	3	97433597	T	G	3.48381e-05	1	172225	ADD	3.3141	1.28272	6.6752	2.00982	NA	CD
3:97433771:G:A	3	97433771	G	A	EPHA6	intron_variant	intron_variant	modifier	intron_variant	NA	NA	NA	NA	NA	NA	NA	NA	NA	intron_variant	3	97433771	G	A	0.0414226	1	172225	ADD	0.289135	0.097219	8.84502	2.53182	NA	CD
3:97434300:T:C	3	97434300	T	C	EPHA6	intron_variant	intron_variant	modifier	intron_variant	NA	NA	NA	NA	NA	NA	NA	NA	NA	intron_variant	3	97434300	T	C	2.61286e-05	1	172225	ADD	4.06906	1.36496	8.88682	2.54176	NA	CD
3:97434538:G:C	3	97434538	G	C	EPHA6	intron_variant	intron_variant	modifier	intron_variant	NA	NA	NA	NA	NA	NA	NA	NA	NA	intron_variant	3	97434538	G	C	4.9354e-05	1	172225	ADD	2.63344	0.927923	8.05421	2.34296	NA	UC
3:97435534:A:G	3	97435534	A	G	EPHA6	intron_variant;upstream_gene_variant	intron_variant	modifier	intron_variant	NA	NA	NA	NA	NA	NA	NA	NA	NA	intron_variant;upstream_gene_variant	3	97435534	A	G	1.16127e-05	1	172225	ADD	4.29297	1.49767	8.21643	2.38182	NA	CD
3:97435858:C:T	3	97435858	C	T	EPHA6	intron_variant;upstream_gene_variant	intron_variant	modifier	intron_variant	NA	NA	NA	NA	NA	NA	NA	NA	NA	intron_variant;upstream_gene_variant	3	97435858	C	T	1.45159e-05	1	172225	ADD	3.69687	1.35162	7.48095	2.20513	NA	UC
3:97435913:A:T	3	97435913	A	T	EPHA6	intron_variant;upstream_gene_variant	intron_variant	modifier	intron_variant	NA	NA	NA	NA	NA	NA	NA	NA	NA	intron_variant;upstream_gene_variant	3	97435913	A	T	5.51604e-05	1	172225	ADD	2.67409	0.792967	11.3721	3.12752	NA	UC
3:97439704:T:A	3	97439704	T	A	EPHA6	intron_variant;intron_variant&NMD_transcript_variant;upstream_gene_variant	intron_variant	modifier	intron_variant	NA	NA	NA	NA	NA	NA	NA	NA	NA	intron_variant;intron_variant&NMD_transcript_variant;upstream_gene_variant	3	97439704	T	A	8.70954e-06	1	172225	ADD	4.0034	1.41952	7.95377	2.31887	NA	UC
3:97440124:G:A	3	97440124	G	A	EPHA6	intron_variant;intron_variant&NMD_transcript_variant;upstream_gene_variant	intron_variant	modifier	intron_variant	NA	NA	NA	NA	NA	NA	NA	NA	NA	intron_variant;intron_variant&NMD_transcript_variant;upstream_gene_variant	3	97440124	G	A	1.45159e-05	1	172225	ADD	3.87606	1.36741	8.03497	2.33835	NA	UC
3:97440585:T:C	3	97440585	T	C	EPHA6	intron_variant;intron_variant&NMD_transcript_variant;upstream_gene_variant	intron_variant	modifier	intron_variant	NA	NA	NA	NA	NA	NA	NA	NA	NA	intron_variant;intron_variant&NMD_transcript_variant;upstream_gene_variant	3	97440585	T	C	1.16128e-05	1	172224	ADD	4.27753	1.56629	7.45835	2.19968	NA	CD
3:97440779:T:C	3	97440779	T	C	EPHA6	intron_variant;intron_variant&NMD_transcript_variant;upstream_gene_variant	intron_variant	modifier	intron_variant	NA	NA	NA	NA	NA	NA	NA	NA	NA	intron_variant;intron_variant&NMD_transcript_variant;upstream_gene_variant	3	97440779	T	C	3.19352e-05	1	172224	ADD	3.47042	1.33552	6.75249	2.02865	NA	CD
3:97440843:G:T	3	97440843	G	T	EPHA6	intron_variant;intron_variant&NMD_transcript_variant;upstream_gene_variant	intron_variant	modifier	intron_variant	NA	NA	NA	NA	NA	NA	NA	NA	NA	intron_variant;intron_variant&NMD_transcript_variant;upstream_gene_variant	3	97440843	G	T	1.16127e-05	1	172225	ADD	3.88638	1.37561	7.98176	2.32559	NA	UC
3:97441603:T:A	3	97441603	T	A	EPHA6	intron_variant;intron_variant&NMD_transcript_variant	intron_variant	modifier	intron_variant	NA	NA	NA	NA	NA	NA	NA	NA	NA	intron_variant;intron_variant&NMD_transcript_variant	3	97441603	T	A	1.45161e-05	1	172223	ADD	4.20656	1.42161	8.75571	2.51056	NA	UC
3:97441603:T:A	3	97441603	T	A	EPHA6	intron_variant;intron_variant&NMD_transcript_variant	intron_variant	modifier	intron_variant	NA	NA	NA	NA	NA	NA	NA	NA	NA	intron_variant;intron_variant&NMD_transcript_variant	3	97441603	T	A	1.45161e-05	1	172223	ADD	4.06943	1.38853	8.5893	2.4709	NA	CD
3:97441918:A:G	3	97441918	A	G	EPHA6	intron_variant;intron_variant&NMD_transcript_variant	intron_variant	modifier	intron_variant	NA	NA	NA	NA	NA	NA	NA	NA	NA	intron_variant;intron_variant&NMD_transcript_variant	3	97441918	A	G	0.00485412	1	172225	ADD	0.708577	0.243906	8.4397	2.4352	NA	CD
3:97442013:G:A	3	97442013	G	A	EPHA6	intron_variant;intron_variant&NMD_transcript_variant	intron_variant	modifier	intron_variant	NA	NA	NA	NA	NA	NA	NA	NA	NA	intron_variant;intron_variant&NMD_transcript_variant	3	97442013	G	A	2.03223e-05	1	172225	ADD	3.66934	1.33865	7.5135	2.21298	NA	UC
3:97444314:AGAT:A	3	97444314	AGAT	A	EPHA6	intron_variant;intron_variant&NMD_transcript_variant	intron_variant	modifier	intron_variant	NA	NA	NA	NA	NA	NA	NA	NA	NA	intron_variant;intron_variant&NMD_transcript_variant	3	97444314	AGAT	A	1.45159e-05	1	172225	ADD	3.49626	1.31364	7.08358	2.10906	NA	UC
3:97444387:G:T	3	97444387	G	T	EPHA6	intron_variant;intron_variant&NMD_transcript_variant	intron_variant	modifier	intron_variant	NA	NA	NA	NA	NA	NA	NA	NA	NA	intron_variant;intron_variant&NMD_transcript_variant	3	97444387	G	T	2.03223e-05	1	172225	ADD	4.07736	1.36349	8.9424	2.55498	NA	CD
3:97444485:G:A	3	97444485	G	A	EPHA6	intron_variant;intron_variant&NMD_transcript_variant	intron_variant	modifier	intron_variant	NA	NA	NA	NA	NA	NA	NA	NA	NA	intron_variant;intron_variant&NMD_transcript_variant	3	97444485	G	A	3.77413e-05	1	172225	ADD	2.56831	0.944232	7.39842	2.18521	NA	UC
3:97444653:C:G	3	97444653	C	G	EPHA6	intron_variant;intron_variant&NMD_transcript_variant	intron_variant	modifier	intron_variant	NA	NA	NA	NA	NA	NA	NA	NA	NA	intron_variant;intron_variant&NMD_transcript_variant	3	97444653	C	G	1.16127e-05	1	172225	ADD	4.74856	1.47057	10.4268	2.90587	NA	CD
3:97445002:A:G	3	97445002	A	G	EPHA6	intron_variant;intron_variant&NMD_transcript_variant	intron_variant	modifier	intron_variant	NA	NA	NA	NA	NA	NA	NA	NA	NA	intron_variant;intron_variant&NMD_transcript_variant	3	97445002	A	G	2.03223e-05	1	172225	ADD	3.92926	1.35707	8.38329	2.42172	NA	CD
3:97445008:C:T	3	97445008	C	T	EPHA6	intron_variant;intron_variant&NMD_transcript_variant	intron_variant	modifier	intron_variant	NA	NA	NA	NA	NA	NA	NA	NA	NA	intron_variant;intron_variant&NMD_transcript_variant	3	97445008	C	T	1.16127e-05	1	172225	ADD	3.45118	1.33685	6.66452	2.00722	NA	UC
3:97445467:C:T	3	97445467	C	T	EPHA6	intron_variant;intron_variant&NMD_transcript_variant	intron_variant	modifier	intron_variant	NA	NA	NA	NA	NA	NA	NA	NA	NA	intron_variant;intron_variant&NMD_transcript_variant	3	97445467	C	T	1.74191e-05	1	172225	ADD	3.39391	1.29771	6.83986	2.0499	NA	UC
3:97446127:T:C	3	97446127	T	C	EPHA6	intron_variant;intron_variant&NMD_transcript_variant	intron_variant	modifier	intron_variant	NA	NA	NA	NA	NA	NA	NA	NA	NA	intron_variant;intron_variant&NMD_transcript_variant	3	97446127	T	C	6.96763e-05	1	172225	ADD	2.98431	0.824049	13.1154	3.53331	NA	CD
3:97447201:A:C	3	97447201	A	C	EPHA6	intron_variant;intron_variant&NMD_transcript_variant	intron_variant	modifier	intron_variant	NA	NA	NA	NA	NA	NA	NA	NA	NA	intron_variant;intron_variant&NMD_transcript_variant	3	97447201	A	C	0.000226448	1	172225	ADD	1.68213	0.614111	7.5028	2.2104	NA	UC
3:97447657:G:C	3	97447657	G	C	EPHA6	intron_variant;intron_variant&NMD_transcript_variant	intron_variant	modifier	intron_variant	NA	NA	NA	NA	NA	NA	NA	NA	NA	intron_variant;intron_variant&NMD_transcript_variant	3	97447657	G	C	0.000284512	1	172225	ADD	1.39304	0.538936	6.68117	2.01128	NA	UC
3:97448159:A:C	3	97448159	A	C	EPHA6	intron_variant;intron_variant&NMD_transcript_variant	intron_variant	modifier	intron_variant	NA	NA	NA	NA	NA	NA	NA	NA	NA	intron_variant;intron_variant&NMD_transcript_variant	3	97448159	A	C	2.61286e-05	1	172225	ADD	3.42815	1.29961	6.95815	2.07863	NA	CD
3:97448159:A:C	3	97448159	A	C	EPHA6	intron_variant;intron_variant&NMD_transcript_variant	intron_variant	modifier	intron_variant	NA	NA	NA	NA	NA	NA	NA	NA	NA	intron_variant;intron_variant&NMD_transcript_variant	3	97448159	A	C	2.61286e-05	1	172225	ADD	3.22779	1.00693	10.2758	2.87036	NA	UC
3:97448589:T:G	3	97448589	T	G	EPHA6	missense_variant;5_prime_UTR_variant&NMD_transcript_variant;5_prime_UTR_variant	missense_variant	moderate	coding_sequence_variant	NA	NA	NA	0.175;NA;NA	0.175	tolerated;NA;NA	tolerated	probably_damaging;NA;NA	probably_damaging	missense_variant;5_prime_UTR_variant&NMD_transcript_variant;5_prime_UTR_variant	3	97448589	T	G	8.70954e-06	1	172225	ADD	5.17583	1.52656	11.4957	3.1564	NA	UC
3:97448838:G:A	3	97448838	G	A	EPHA6	intron_variant;intron_variant&NMD_transcript_variant	intron_variant	modifier	intron_variant	NA	NA	NA	NA	NA	NA	NA	NA	NA	intron_variant;intron_variant&NMD_transcript_variant	3	97448838	G	A	3.1935e-05	1	172225	ADD	2.86434	0.965054	8.80939	2.52334	NA	UC
3:97449238:A:G	3	97449238	A	G	EPHA6	intron_variant;intron_variant&NMD_transcript_variant	intron_variant	modifier	intron_variant	NA	NA	NA	NA	NA	NA	NA	NA	NA	intron_variant;intron_variant&NMD_transcript_variant	3	97449238	A	G	2.32254e-05	1	172225	ADD	3.35303	1.02388	10.7246	2.97584	NA	UC
3:97449876:G:C	3	97449876	G	C	EPHA6	intron_variant;intron_variant&NMD_transcript_variant	intron_variant	modifier	intron_variant	NA	NA	NA	NA	NA	NA	NA	NA	NA	intron_variant;intron_variant&NMD_transcript_variant	3	97449876	G	C	1.74191e-05	1	172225	ADD	4.67219	1.43634	10.581	2.94211	NA	CD
3:97450011:C:A	3	97450011	C	A	EPHA6	intron_variant;intron_variant&NMD_transcript_variant	intron_variant	modifier	intron_variant	NA	NA	NA	NA	NA	NA	NA	NA	NA	intron_variant;intron_variant&NMD_transcript_variant	3	97450011	C	A	1.16127e-05	1	172225	ADD	4.15217	1.39051	8.91663	2.54885	NA	CD
3:97450011:C:A	3	97450011	C	A	EPHA6	intron_variant;intron_variant&NMD_transcript_variant	intron_variant	modifier	intron_variant	NA	NA	NA	NA	NA	NA	NA	NA	NA	intron_variant;intron_variant&NMD_transcript_variant	3	97450011	C	A	1.16127e-05	1	172225	ADD	3.48351	1.3236	6.92664	2.07098	NA	UC
3:97450492:C:G	3	97450492	C	G	EPHA6	intron_variant;intron_variant&NMD_transcript_variant	intron_variant	modifier	intron_variant	NA	NA	NA	NA	NA	NA	NA	NA	NA	intron_variant;intron_variant&NMD_transcript_variant	3	97450492	C	G	5.22572e-05	1	172225	ADD	3.24321	0.987745	10.781	2.98908	NA	CD
3:97451383:TCTGACAATGG:T	3	97451383	TCTGACAATGG	T	EPHA6	intron_variant;intron_variant&NMD_transcript_variant	intron_variant	modifier	intron_variant	NA	NA	NA	NA	NA	NA	NA	NA	NA	intron_variant;intron_variant&NMD_transcript_variant	3	97451383	TCTGACAATGG	T	1.45159e-05	1	172225	ADD	3.7354	1.34754	7.68402	2.25405	NA	CD
3:97452503:C:A	3	97452503	C	A	EPHA6	intron_variant;intron_variant&NMD_transcript_variant	intron_variant	modifier	intron_variant	NA	NA	NA	NA	NA	NA	NA	NA	NA	intron_variant;intron_variant&NMD_transcript_variant	3	97452503	C	A	1.16127e-05	1	172225	ADD	4.55931	1.44215	9.99485	2.80416	NA	CD
3:97452876:C:A	3	97452876	C	A	EPHA6	intron_variant;intron_variant&NMD_transcript_variant	intron_variant	modifier	intron_variant	NA	NA	NA	NA	NA	NA	NA	NA	NA	intron_variant;intron_variant&NMD_transcript_variant	3	97452876	C	A	1.45159e-05	1	172225	ADD	3.64311	1.33143	7.48702	2.20659	NA	CD
3:97453364:A:G	3	97453364	A	G	EPHA6	intron_variant;intron_variant&NMD_transcript_variant	intron_variant	modifier	intron_variant	NA	NA	NA	NA	NA	NA	NA	NA	NA	intron_variant;intron_variant&NMD_transcript_variant	3	97453364	A	G	3.1935e-05	1	172225	ADD	3.87463	1.33495	8.4242	2.43149	NA	CD
3:97453386:T:C	3	97453386	T	C	EPHA6	intron_variant;intron_variant&NMD_transcript_variant	intron_variant	modifier	intron_variant	NA	NA	NA	NA	NA	NA	NA	NA	NA	intron_variant;intron_variant&NMD_transcript_variant	3	97453386	T	C	1.74191e-05	1	172225	ADD	3.44863	1.31268	6.90199	2.065	NA	CD
3:97453455:C:T	3	97453455	C	T	EPHA6	intron_variant;intron_variant&NMD_transcript_variant	intron_variant	modifier	intron_variant	NA	NA	NA	NA	NA	NA	NA	NA	NA	intron_variant;intron_variant&NMD_transcript_variant	3	97453455	C	T	8.70954e-06	1	172225	ADD	5.61007	1.5744	12.6971	3.43626	NA	CD
3:97454060:A:G	3	97454060	A	G	EPHA6	intron_variant;intron_variant&NMD_transcript_variant	intron_variant	modifier	intron_variant	NA	NA	NA	NA	NA	NA	NA	NA	NA	intron_variant;intron_variant&NMD_transcript_variant	3	97454060	A	G	1.16127e-05	1	172225	ADD	4.09196	1.39473	8.6076	2.47526	NA	UC
3:97454060:A:G	3	97454060	A	G	EPHA6	intron_variant;intron_variant&NMD_transcript_variant	intron_variant	modifier	intron_variant	NA	NA	NA	NA	NA	NA	NA	NA	NA	intron_variant;intron_variant&NMD_transcript_variant	3	97454060	A	G	1.16127e-05	1	172225	ADD	4.13603	1.47008	7.91567	2.30973	NA	CD
3:97455864:A:T	3	97455864	A	T	EPHA6	intron_variant;intron_variant&NMD_transcript_variant	intron_variant	modifier	intron_variant	NA	NA	NA	NA	NA	NA	NA	NA	NA	intron_variant;intron_variant&NMD_transcript_variant	3	97455864	A	T	1.16127e-05	1	172225	ADD	4.02428	1.37929	8.51262	2.4526	NA	UC
3:97456110:T:A	3	97456110	T	A	EPHA6	intron_variant;intron_variant&NMD_transcript_variant	intron_variant	modifier	intron_variant	NA	NA	NA	NA	NA	NA	NA	NA	NA	intron_variant;intron_variant&NMD_transcript_variant	3	97456110	T	A	1.45159e-05	1	172225	ADD	3.8786	1.36036	8.12911	2.36091	NA	UC
3:97456184:G:C	3	97456184	G	C	EPHA6	intron_variant;intron_variant&NMD_transcript_variant	intron_variant	modifier	intron_variant	NA	NA	NA	NA	NA	NA	NA	NA	NA	intron_variant;intron_variant&NMD_transcript_variant	3	97456184	G	C	2.03223e-05	1	172225	ADD	4.05107	1.37223	8.71544	2.50096	NA	CD
3:97458117:C:T	3	97458117	C	T	EPHA6	intron_variant;intron_variant&NMD_transcript_variant	intron_variant	modifier	intron_variant	NA	NA	NA	NA	NA	NA	NA	NA	NA	intron_variant;intron_variant&NMD_transcript_variant	3	97458117	C	T	2.32254e-05	1	172225	ADD	3.63634	1.31613	7.63366	2.24193	NA	CD
3:97458133:G:A	3	97458133	G	A	EPHA6	intron_variant;intron_variant&NMD_transcript_variant	intron_variant	modifier	intron_variant	NA	NA	NA	NA	NA	NA	NA	NA	NA	intron_variant;intron_variant&NMD_transcript_variant	3	97458133	G	A	2.32254e-05	1	172225	ADD	3.3144	1.28386	6.66463	2.00725	NA	UC
3:97458754:G:A	3	97458754	G	A	EPHA6	intron_variant;intron_variant&NMD_transcript_variant	intron_variant	modifier	intron_variant	NA	NA	NA	NA	NA	NA	NA	NA	NA	intron_variant;intron_variant&NMD_transcript_variant	3	97458754	G	A	3.48381e-05	1	172225	ADD	3.58488	1.30808	7.51072	2.21231	NA	CD
3:97459769:C:T	3	97459769	C	T	EPHA6	intron_variant;intron_variant&NMD_transcript_variant	intron_variant	modifier	intron_variant	NA	NA	NA	NA	NA	NA	NA	NA	NA	intron_variant;intron_variant&NMD_transcript_variant	3	97459769	C	T	6.67731e-05	1	172225	ADD	2.76762	0.71234	15.0952	3.99045	NA	UC
3:97459781:T:TA	3	97459781	T	TA	EPHA6	intron_variant;intron_variant&NMD_transcript_variant	intron_variant	modifier	intron_variant	NA	NA	NA	NA	NA	NA	NA	NA	NA	intron_variant;intron_variant&NMD_transcript_variant	3	97459781	T	TA	0.000461605	1	172225	ADD	1.30833	0.458177	8.15392	2.36685	NA	UC
3:97461750:A:G	3	97461750	A	G	EPHA6	intron_variant;intron_variant&NMD_transcript_variant	intron_variant	modifier	intron_variant	NA	NA	NA	NA	NA	NA	NA	NA	NA	intron_variant;intron_variant&NMD_transcript_variant	3	97461750	A	G	1.16127e-05	1	172225	ADD	3.98196	1.41294	7.94237	2.31614	NA	UC
3:97462354:C:T	3	97462354	C	T	EPHA6	intron_variant;intron_variant&NMD_transcript_variant	intron_variant	modifier	intron_variant	NA	NA	NA	NA	NA	NA	NA	NA	NA	intron_variant;intron_variant&NMD_transcript_variant	3	97462354	C	T	2.03223e-05	1	172225	ADD	3.42023	1.29169	7.01118	2.0915	NA	CD
3:97462520:C:T	3	97462520	C	T	EPHA6	intron_variant;intron_variant&NMD_transcript_variant	intron_variant	modifier	intron_variant	NA	NA	NA	NA	NA	NA	NA	NA	NA	intron_variant;intron_variant&NMD_transcript_variant	3	97462520	C	T	1.74191e-05	1	172225	ADD	3.90467	1.36644	8.16565	2.36966	NA	CD
3:97462662:G:C	3	97462662	G	C	EPHA6	intron_variant;intron_variant&NMD_transcript_variant	intron_variant	modifier	intron_variant	NA	NA	NA	NA	NA	NA	NA	NA	NA	intron_variant;intron_variant&NMD_transcript_variant	3	97462662	G	C	1.74191e-05	1	172225	ADD	3.66203	1.35492	7.30491	2.16262	NA	UC
3:97463276:A:G	3	97463276	A	G	EPHA6	intron_variant;intron_variant&NMD_transcript_variant	intron_variant	modifier	intron_variant	NA	NA	NA	NA	NA	NA	NA	NA	NA	intron_variant;intron_variant&NMD_transcript_variant	3	97463276	A	G	0.000226448	1	172225	ADD	1.68213	0.614111	7.5028	2.2104	NA	UC
3:97463861:A:G	3	97463861	A	G	EPHA6	intron_variant;intron_variant&NMD_transcript_variant	intron_variant	modifier	intron_variant	NA	NA	NA	NA	NA	NA	NA	NA	NA	intron_variant;intron_variant&NMD_transcript_variant	3	97463861	A	G	8.70954e-06	1	172225	ADD	4.97715	1.50093	10.9961	3.03951	NA	CD
3:97463861:A:G	3	97463861	A	G	EPHA6	intron_variant;intron_variant&NMD_transcript_variant	intron_variant	modifier	intron_variant	NA	NA	NA	NA	NA	NA	NA	NA	NA	intron_variant;intron_variant&NMD_transcript_variant	3	97463861	A	G	8.70954e-06	1	172225	ADD	4.04857	1.4401	7.90348	2.3068	NA	UC
3:97463903:T:C	3	97463903	T	C	EPHA6	intron_variant;intron_variant&NMD_transcript_variant	intron_variant	modifier	intron_variant	NA	NA	NA	NA	NA	NA	NA	NA	NA	intron_variant;intron_variant&NMD_transcript_variant	3	97463903	T	C	1.45159e-05	1	172225	ADD	4.18047	1.40726	8.82472	2.52699	NA	CD
3:97463903:T:C	3	97463903	T	C	EPHA6	intron_variant;intron_variant&NMD_transcript_variant	intron_variant	modifier	intron_variant	NA	NA	NA	NA	NA	NA	NA	NA	NA	intron_variant;intron_variant&NMD_transcript_variant	3	97463903	T	C	1.45159e-05	1	172225	ADD	3.56695	1.3408	7.07733	2.10754	NA	UC
3:97466000:C:T	3	97466000	C	T	EPHA6	intron_variant;intron_variant&NMD_transcript_variant	intron_variant	modifier	intron_variant	NA	NA	NA	NA	NA	NA	NA	NA	NA	intron_variant;intron_variant&NMD_transcript_variant	3	97466000	C	T	8.70954e-06	1	172225	ADD	5.381	1.53123	12.3493	3.35542	NA	CD
3:97466002:A:G	3	97466002	A	G	EPHA6	intron_variant;intron_variant&NMD_transcript_variant	intron_variant	modifier	intron_variant	NA	NA	NA	NA	NA	NA	NA	NA	NA	intron_variant;intron_variant&NMD_transcript_variant	3	97466002	A	G	2.32254e-05	1	172225	ADD	3.55031	1.31685	7.26882	2.1539	NA	CD
3:97466776:A:C	3	97466776	A	C	EPHA6	intron_variant;intron_variant&NMD_transcript_variant	intron_variant	modifier	intron_variant	NA	NA	NA	NA	NA	NA	NA	NA	NA	intron_variant;intron_variant&NMD_transcript_variant	3	97466776	A	C	1.45159e-05	1	172225	ADD	3.55535	1.33609	7.08094	2.10842	NA	CD
3:97467023:C:T	3	97467023	C	T	EPHA6	intron_variant;intron_variant&NMD_transcript_variant	intron_variant	modifier	intron_variant	NA	NA	NA	NA	NA	NA	NA	NA	NA	intron_variant;intron_variant&NMD_transcript_variant	3	97467023	C	T	0.000226448	1	172225	ADD	1.68213	0.614111	7.5028	2.2104	NA	UC
3:97467315:T:C	3	97467315	T	C	EPHA6	intron_variant;intron_variant&NMD_transcript_variant	intron_variant	modifier	intron_variant	NA	NA	NA	NA	NA	NA	NA	NA	NA	intron_variant;intron_variant&NMD_transcript_variant	3	97467315	T	C	1.16127e-05	1	172225	ADD	3.48351	1.3236	6.92664	2.07098	NA	UC
3:97467315:T:C	3	97467315	T	C	EPHA6	intron_variant;intron_variant&NMD_transcript_variant	intron_variant	modifier	intron_variant	NA	NA	NA	NA	NA	NA	NA	NA	NA	intron_variant;intron_variant&NMD_transcript_variant	3	97467315	T	C	1.16127e-05	1	172225	ADD	4.15217	1.39051	8.91663	2.54885	NA	CD
3:97467683:A:G	3	97467683	A	G	EPHA6	intron_variant;intron_variant&NMD_transcript_variant	intron_variant	modifier	intron_variant	NA	NA	NA	NA	NA	NA	NA	NA	NA	intron_variant;intron_variant&NMD_transcript_variant	3	97467683	A	G	0.000168384	1	172225	ADD	1.98814	0.618744	10.3246	2.88184	NA	CD
3:97468736:A:G	3	97468736	A	G	EPHA6	intron_variant;intron_variant&NMD_transcript_variant	intron_variant	modifier	intron_variant	NA	NA	NA	NA	NA	NA	NA	NA	NA	intron_variant;intron_variant&NMD_transcript_variant	3	97468736	A	G	1.16127e-05	1	172225	ADD	3.65088	1.37357	7.06472	2.10449	NA	UC
3:97469913:G:A	3	97469913	G	A	EPHA6	intron_variant;intron_variant&NMD_transcript_variant	intron_variant	modifier	intron_variant	NA	NA	NA	NA	NA	NA	NA	NA	NA	intron_variant;intron_variant&NMD_transcript_variant	3	97469913	G	A	1.45159e-05	1	172225	ADD	3.74293	1.34478	7.74675	2.26914	NA	UC
3:97469996:A:G	3	97469996	A	G	EPHA6	intron_variant;intron_variant&NMD_transcript_variant	intron_variant	modifier	intron_variant	NA	NA	NA	NA	NA	NA	NA	NA	NA	intron_variant;intron_variant&NMD_transcript_variant	3	97469996	A	G	0.000226448	1	172225	ADD	1.68213	0.614111	7.5028	2.2104	NA	UC
3:97470738:T:C	3	97470738	T	C	EPHA6	intron_variant;intron_variant&NMD_transcript_variant	intron_variant	modifier	intron_variant	NA	NA	NA	NA	NA	NA	NA	NA	NA	intron_variant;intron_variant&NMD_transcript_variant	3	97470738	T	C	1.74191e-05	1	172225	ADD	3.86287	1.3879	7.74647	2.26908	NA	CD
3:97470824:A:G	3	97470824	A	G	EPHA6	intron_variant;intron_variant&NMD_transcript_variant	intron_variant	modifier	intron_variant	NA	NA	NA	NA	NA	NA	NA	NA	NA	intron_variant;intron_variant&NMD_transcript_variant	3	97470824	A	G	1.16127e-05	1	172225	ADD	4.03221	1.42599	7.99567	2.32893	NA	CD
3:97470824:A:G	3	97470824	A	G	EPHA6	intron_variant;intron_variant&NMD_transcript_variant	intron_variant	modifier	intron_variant	NA	NA	NA	NA	NA	NA	NA	NA	NA	intron_variant;intron_variant&NMD_transcript_variant	3	97470824	A	G	1.16127e-05	1	172225	ADD	4.20685	1.3949	9.09548	2.59135	NA	UC
3:97470940:T:C	3	97470940	T	C	EPHA6	intron_variant;intron_variant&NMD_transcript_variant	intron_variant	modifier	intron_variant	NA	NA	NA	NA	NA	NA	NA	NA	NA	intron_variant;intron_variant&NMD_transcript_variant	3	97470940	T	C	5.22572e-05	1	172225	ADD	3.18155	0.983751	10.4594	2.91355	NA	CD
3:97471578:A:G	3	97471578	A	G	EPHA6	intron_variant;intron_variant&NMD_transcript_variant	intron_variant	modifier	intron_variant	NA	NA	NA	NA	NA	NA	NA	NA	NA	intron_variant;intron_variant&NMD_transcript_variant	3	97471578	A	G	8.70954e-06	1	172225	ADD	4.4033	1.45747	9.12758	2.59897	NA	CD
3:97471578:A:G	3	97471578	A	G	EPHA6	intron_variant;intron_variant&NMD_transcript_variant	intron_variant	modifier	intron_variant	NA	NA	NA	NA	NA	NA	NA	NA	NA	intron_variant;intron_variant&NMD_transcript_variant	3	97471578	A	G	8.70954e-06	1	172225	ADD	4.25741	1.46203	8.47968	2.44474	NA	UC
3:97471612:G:A	3	97471612	G	A	EPHA6	intron_variant;intron_variant&NMD_transcript_variant	intron_variant	modifier	intron_variant	NA	NA	NA	NA	NA	NA	NA	NA	NA	intron_variant;intron_variant&NMD_transcript_variant	3	97471612	G	A	1.45159e-05	1	172225	ADD	4.48653	1.45132	9.55647	2.70061	NA	CD
3:97472617:A:T	3	97472617	A	T	EPHA6	intron_variant;intron_variant&NMD_transcript_variant	intron_variant	modifier	intron_variant	NA	NA	NA	NA	NA	NA	NA	NA	NA	intron_variant;intron_variant&NMD_transcript_variant	3	97472617	A	T	2.32254e-05	1	172225	ADD	3.80509	1.34202	8.0392	2.33936	NA	CD
3:97473175:T:C	3	97473175	T	C	EPHA6	intron_variant;intron_variant&NMD_transcript_variant	intron_variant	modifier	intron_variant	NA	NA	NA	NA	NA	NA	NA	NA	NA	intron_variant;intron_variant&NMD_transcript_variant	3	97473175	T	C	1.16127e-05	1	172225	ADD	4.67699	1.53654	9.26501	2.63158	NA	CD
3:97473292:C:T	3	97473292	C	T	EPHA6	intron_variant;intron_variant&NMD_transcript_variant	intron_variant	modifier	intron_variant	NA	NA	NA	NA	NA	NA	NA	NA	NA	intron_variant;intron_variant&NMD_transcript_variant	3	97473292	C	T	9.58049e-05	1	172225	ADD	2.56238	0.910261	7.92419	2.31178	NA	CD
3:97473633:C:A	3	97473633	C	A	EPHA6	intron_variant;intron_variant&NMD_transcript_variant	intron_variant	modifier	intron_variant	NA	NA	NA	NA	NA	NA	NA	NA	NA	intron_variant;intron_variant&NMD_transcript_variant	3	97473633	C	A	1.16127e-05	1	172225	ADD	4.07856	1.41197	8.34377	2.41228	NA	CD
3:97474192:G:A	3	97474192	G	A	EPHA6	intron_variant;intron_variant&NMD_transcript_variant	intron_variant	modifier	intron_variant	NA	NA	NA	NA	NA	NA	NA	NA	NA	intron_variant;intron_variant&NMD_transcript_variant	3	97474192	G	A	2.32254e-05	1	172225	ADD	4.55191	1.11979	16.524	4.3184	NA	CD
3:97474192:G:A	3	97474192	G	A	EPHA6	intron_variant;intron_variant&NMD_transcript_variant	intron_variant	modifier	intron_variant	NA	NA	NA	NA	NA	NA	NA	NA	NA	intron_variant;intron_variant&NMD_transcript_variant	3	97474192	G	A	2.32254e-05	1	172225	ADD	3.46378	1.10024	9.91124	2.78444	NA	UC
3:97474193:A:G	3	97474193	A	G	EPHA6	intron_variant;intron_variant&NMD_transcript_variant	intron_variant	modifier	intron_variant	NA	NA	NA	NA	NA	NA	NA	NA	NA	intron_variant;intron_variant&NMD_transcript_variant	3	97474193	A	G	8.70954e-06	1	172225	ADD	4.93837	1.48725	11.0256	3.04641	NA	UC
3:97474193:A:G	3	97474193	A	G	EPHA6	intron_variant;intron_variant&NMD_transcript_variant	intron_variant	modifier	intron_variant	NA	NA	NA	NA	NA	NA	NA	NA	NA	intron_variant;intron_variant&NMD_transcript_variant	3	97474193	A	G	8.70954e-06	1	172225	ADD	4.55668	1.4657	9.66519	2.72632	NA	CD
3:97474659:T:G	3	97474659	T	G	EPHA6	intron_variant;intron_variant&NMD_transcript_variant	intron_variant	modifier	intron_variant	NA	NA	NA	NA	NA	NA	NA	NA	NA	intron_variant;intron_variant&NMD_transcript_variant	3	97474659	T	G	0.000226448	1	172225	ADD	1.68213	0.614111	7.5028	2.2104	NA	UC
3:97475111:A:C	3	97475111	A	C	EPHA6	intron_variant;intron_variant&NMD_transcript_variant	intron_variant	modifier	intron_variant	NA	NA	NA	NA	NA	NA	NA	NA	NA	intron_variant;intron_variant&NMD_transcript_variant	3	97475111	A	C	2.32254e-05	1	172225	ADD	3.57438	1.32986	7.22422	2.14311	NA	UC
3:97475361:T:G	3	97475361	T	G	EPHA6	missense_variant;start_lost&NMD_transcript_variant;missense_variant;missense_variant&NMD_transcript_variant;start_lost&NMD_transcript_variant;missense_variant	start_lost	high	coding_sequence_variant	NA	NA	NA	0.113;NA;0.113;0.113;NA;0.113	0.113	tolerated;deleterious_low_confidence;deleterious_low_confidence;tolerated_low_confidence;deleterious_low_confidence;deleterious_low_confidence	deleterious_low_confidence	benign;benign;benign;benign;benign;benign	benign	missense_variant;start_lost&NMD_transcript_variant;missense_variant;missense_variant&NMD_transcript_variant;start_lost&NMD_transcript_variant;missense_variant	3	97475361	T	G	0.000987081	1	172225	ADD	1.19634	0.443481	7.27714	2.15591	NA	CD
3:97475386:C:T	3	97475386	C	T	EPHA6	synonymous_variant;synonymous_variant&NMD_transcript_variant	synonymous_variant	low	coding_sequence_variant	NA	NA	NA	NA	NA	NA	NA	NA	NA	synonymous_variant;synonymous_variant&NMD_transcript_variant	3	97475386	C	T	0.000226448	1	172225	ADD	1.68213	0.614111	7.5028	2.2104	NA	UC
3:97477380:C:A	3	97477380	C	A	EPHA6	intron_variant;intron_variant&NMD_transcript_variant	intron_variant	modifier	intron_variant	NA	NA	NA	NA	NA	NA	NA	NA	NA	intron_variant;intron_variant&NMD_transcript_variant	3	97477380	C	A	2.32254e-05	1	172225	ADD	3.92214	1.34552	8.49697	2.44887	NA	CD
3:97478397:CAAAT:C	3	97478397	CAAAT	C	EPHA6	intron_variant;intron_variant&NMD_transcript_variant	intron_variant	modifier	intron_variant	NA	NA	NA	NA	NA	NA	NA	NA	NA	intron_variant;intron_variant&NMD_transcript_variant	3	97478397	CAAAT	C	3.1935e-05	1	172225	ADD	3.68859	1.31927	7.81727	2.2861	NA	CD
3:97478553:T:A	3	97478553	T	A	EPHA6	intron_variant;intron_variant&NMD_transcript_variant	intron_variant	modifier	intron_variant	NA	NA	NA	NA	NA	NA	NA	NA	NA	intron_variant;intron_variant&NMD_transcript_variant	3	97478553	T	A	1.45159e-05	1	172225	ADD	4.55508	1.46389	9.68226	2.73036	NA	CD
3:97478851:G:A	3	97478851	G	A	EPHA6	intron_variant;intron_variant&NMD_transcript_variant	intron_variant	modifier	intron_variant	NA	NA	NA	NA	NA	NA	NA	NA	NA	intron_variant;intron_variant&NMD_transcript_variant	3	97478851	G	A	8.41922e-05	1	172225	ADD	2.37033	0.895428	7.0074	2.09059	NA	CD
3:97479103:G:A	3	97479103	G	A	EPHA6	intron_variant;intron_variant&NMD_transcript_variant	intron_variant	modifier	intron_variant	NA	NA	NA	NA	NA	NA	NA	NA	NA	intron_variant;intron_variant&NMD_transcript_variant	3	97479103	G	A	1.16127e-05	1	172225	ADD	4.9697	1.48539	11.1939	3.08583	NA	CD
3:97480070:TG:T	3	97480070	TG	T	EPHA6	intron_variant;intron_variant&NMD_transcript_variant	intron_variant	modifier	intron_variant	NA	NA	NA	NA	NA	NA	NA	NA	NA	intron_variant;intron_variant&NMD_transcript_variant	3	97480070	TG	T	0.000226448	1	172225	ADD	1.68213	0.614111	7.5028	2.2104	NA	UC
3:97481584:TG:T	3	97481584	TG	T	EPHA6	intron_variant;intron_variant&NMD_transcript_variant	intron_variant	modifier	intron_variant	NA	NA	NA	NA	NA	NA	NA	NA	NA	intron_variant;intron_variant&NMD_transcript_variant	3	97481584	TG	T	8.70954e-06	1	172225	ADD	3.91743	1.41835	7.62841	2.24067	NA	CD
3:97481911:T:C	3	97481911	T	C	EPHA6	intron_variant;intron_variant&NMD_transcript_variant	intron_variant	modifier	intron_variant	NA	NA	NA	NA	NA	NA	NA	NA	NA	intron_variant;intron_variant&NMD_transcript_variant	3	97481911	T	C	1.16127e-05	1	172225	ADD	4.31935	1.42141	9.2342	2.62427	NA	CD
3:97482332:G:A	3	97482332	G	A	EPHA6	intron_variant;intron_variant&NMD_transcript_variant	intron_variant	modifier	intron_variant	NA	NA	NA	NA	NA	NA	NA	NA	NA	intron_variant;intron_variant&NMD_transcript_variant	3	97482332	G	A	3.1935e-05	1	172225	ADD	4.11562	1.36585	9.07951	2.58756	NA	CD
3:97482520:T:C	3	97482520	T	C	EPHA6	intron_variant;intron_variant&NMD_transcript_variant	intron_variant	modifier	intron_variant	NA	NA	NA	NA	NA	NA	NA	NA	NA	intron_variant;intron_variant&NMD_transcript_variant	3	97482520	T	C	8.70954e-06	1	172225	ADD	3.9671	1.3894	8.15247	2.36651	NA	UC
3:97482753:T:G	3	97482753	T	G	EPHA6	intron_variant;intron_variant&NMD_transcript_variant	intron_variant	modifier	intron_variant	NA	NA	NA	NA	NA	NA	NA	NA	NA	intron_variant;intron_variant&NMD_transcript_variant	3	97482753	T	G	2.03223e-05	1	172225	ADD	4.69496	1.43957	10.6365	2.95515	NA	CD
3:97483892:G:A	3	97483892	G	A	EPHA6	intron_variant;intron_variant&NMD_transcript_variant	intron_variant	modifier	intron_variant	NA	NA	NA	NA	NA	NA	NA	NA	NA	intron_variant;intron_variant&NMD_transcript_variant	3	97483892	G	A	8.70954e-06	1	172225	ADD	5.32771	1.52524	12.2013	3.32097	NA	CD
3:97484361:C:T	3	97484361	C	T	EPHA6	intron_variant;intron_variant&NMD_transcript_variant	intron_variant	modifier	intron_variant	NA	NA	NA	NA	NA	NA	NA	NA	NA	intron_variant;intron_variant&NMD_transcript_variant	3	97484361	C	T	3.48381e-05	1	172225	ADD	3.32907	0.998976	11.1054	3.06512	NA	UC
3:97486026:TA:T	3	97486026	TA	T	EPHA6	intron_variant;intron_variant&NMD_transcript_variant	intron_variant	modifier	intron_variant	NA	NA	NA	NA	NA	NA	NA	NA	NA	intron_variant;intron_variant&NMD_transcript_variant	3	97486026	TA	T	8.70954e-06	1	172225	ADD	3.93272	1.38789	8.02922	2.33697	NA	CD
3:97486763:C:A	3	97486763	C	A	EPHA6	intron_variant;intron_variant&NMD_transcript_variant	intron_variant	modifier	intron_variant	NA	NA	NA	NA	NA	NA	NA	NA	NA	intron_variant;intron_variant&NMD_transcript_variant	3	97486763	C	A	8.70954e-06	1	172225	ADD	4.89959	1.65988	8.71297	2.50038	NA	CD
3:97486763:C:A	3	97486763	C	A	EPHA6	intron_variant;intron_variant&NMD_transcript_variant	intron_variant	modifier	intron_variant	NA	NA	NA	NA	NA	NA	NA	NA	NA	intron_variant;intron_variant&NMD_transcript_variant	3	97486763	C	A	8.70954e-06	1	172225	ADD	4.6318	1.49962	9.53975	2.69665	NA	UC
3:97488289:A:G	3	97488289	A	G	EPHA6	intron_variant;intron_variant&NMD_transcript_variant	intron_variant	modifier	intron_variant	NA	NA	NA	NA	NA	NA	NA	NA	NA	intron_variant;intron_variant&NMD_transcript_variant	3	97488289	A	G	8.70954e-06	1	172225	ADD	3.89532	1.41137	7.61734	2.238	NA	UC
3:97488721:G:C	3	97488721	G	C	EPHA6	intron_variant;intron_variant&NMD_transcript_variant	intron_variant	modifier	intron_variant	NA	NA	NA	NA	NA	NA	NA	NA	NA	intron_variant;intron_variant&NMD_transcript_variant	3	97488721	G	C	8.70954e-06	1	172225	ADD	4.36632	1.46312	8.90573	2.54626	NA	UC
3:97488783:C:T	3	97488783	C	T	EPHA6	intron_variant;intron_variant&NMD_transcript_variant	intron_variant	modifier	intron_variant	NA	NA	NA	NA	NA	NA	NA	NA	NA	intron_variant;intron_variant&NMD_transcript_variant	3	97488783	C	T	8.70954e-06	1	172225	ADD	3.8049	1.39642	7.42429	2.19146	NA	CD
3:97488853:T:A	3	97488853	T	A	EPHA6	intron_variant;intron_variant&NMD_transcript_variant	intron_variant	modifier	intron_variant	NA	NA	NA	NA	NA	NA	NA	NA	NA	intron_variant;intron_variant&NMD_transcript_variant	3	97488853	T	A	2.61286e-05	1	172225	ADD	3.44337	1.29106	7.11337	2.11627	NA	CD
3:97488868:G:C	3	97488868	G	C	EPHA6	intron_variant;intron_variant&NMD_transcript_variant	intron_variant	modifier	intron_variant	NA	NA	NA	NA	NA	NA	NA	NA	NA	intron_variant;intron_variant&NMD_transcript_variant	3	97488868	G	C	2.32254e-05	1	172225	ADD	3.56198	1.32621	7.21375	2.14058	NA	UC
3:97489767:TA:T	3	97489767	TA	T	EPHA6	intron_variant;intron_variant&NMD_transcript_variant	intron_variant	modifier	intron_variant	NA	NA	NA	NA	NA	NA	NA	NA	NA	intron_variant;intron_variant&NMD_transcript_variant	3	97489767	TA	T	6.38699e-05	1	172225	ADD	3.23924	0.978926	10.9493	3.02855	NA	CD
3:97493842:G:T	3	97493842	G	T	EPHA6	intron_variant;intron_variant&NMD_transcript_variant	intron_variant	modifier	intron_variant	NA	NA	NA	NA	NA	NA	NA	NA	NA	intron_variant;intron_variant&NMD_transcript_variant	3	97493842	G	T	0.000226448	1	172225	ADD	2.26728	0.658977	11.8378	3.23627	NA	CD
3:97494189:C:T	3	97494189	C	T	EPHA6	intron_variant;intron_variant&NMD_transcript_variant	intron_variant	modifier	intron_variant	NA	NA	NA	NA	NA	NA	NA	NA	NA	intron_variant;intron_variant&NMD_transcript_variant	3	97494189	C	T	0.000226448	1	172225	ADD	1.68213	0.614111	7.5028	2.2104	NA	UC
3:97494232:G:A	3	97494232	G	A	EPHA6	intron_variant;intron_variant&NMD_transcript_variant	intron_variant	modifier	intron_variant	NA	NA	NA	NA	NA	NA	NA	NA	NA	intron_variant;intron_variant&NMD_transcript_variant	3	97494232	G	A	0.000240964	1	172225	ADD	1.57117	0.606078	6.72032	2.02081	NA	UC
3:97494322:T:G	3	97494322	T	G	EPHA6	intron_variant;intron_variant&NMD_transcript_variant	intron_variant	modifier	intron_variant	NA	NA	NA	NA	NA	NA	NA	NA	NA	intron_variant;intron_variant&NMD_transcript_variant	3	97494322	T	G	0.000987081	1	172225	ADD	1.19634	0.443481	7.27714	2.15591	NA	CD
3:97494421:C:G	3	97494421	C	G	EPHA6	intron_variant;intron_variant&NMD_transcript_variant	intron_variant	modifier	intron_variant	NA	NA	NA	NA	NA	NA	NA	NA	NA	intron_variant;intron_variant&NMD_transcript_variant	3	97494421	C	G	1.45159e-05	1	172225	ADD	4.14003	1.50004	7.6173	2.23799	NA	CD
3:97498448:A:G	3	97498448	A	G	EPHA6	intron_variant;intron_variant&NMD_transcript_variant	intron_variant	modifier	intron_variant	NA	NA	NA	NA	NA	NA	NA	NA	NA	intron_variant;intron_variant&NMD_transcript_variant	3	97498448	A	G	1.74191e-05	1	172225	ADD	3.87312	1.34475	8.29541	2.40071	NA	UC
3:97499075:CT:C	3	97499075	CT	C	EPHA6	intron_variant;intron_variant&NMD_transcript_variant	intron_variant	modifier	intron_variant	NA	NA	NA	NA	NA	NA	NA	NA	NA	intron_variant;intron_variant&NMD_transcript_variant	3	97499075	CT	C	0.0469067	1	172225	ADD	0.252262	0.0931919	7.32737	2.16805	NA	CD
3:97499133:C:T	3	97499133	C	T	EPHA6	intron_variant;intron_variant&NMD_transcript_variant	intron_variant	modifier	intron_variant	NA	NA	NA	NA	NA	NA	NA	NA	NA	intron_variant;intron_variant&NMD_transcript_variant	3	97499133	C	T	2.03223e-05	1	172225	ADD	4.02764	1.39937	8.28388	2.39795	NA	CD
3:97499245:C:T	3	97499245	C	T	EPHA6	intron_variant;intron_variant&NMD_transcript_variant	intron_variant	modifier	intron_variant	NA	NA	NA	NA	NA	NA	NA	NA	NA	intron_variant;intron_variant&NMD_transcript_variant	3	97499245	C	T	1.16127e-05	1	172225	ADD	4.302	1.42537	9.10937	2.59465	NA	CD
3:97500976:G:T	3	97500976	G	T	EPHA6	intron_variant;intron_variant&NMD_transcript_variant	intron_variant	modifier	intron_variant	NA	NA	NA	NA	NA	NA	NA	NA	NA	intron_variant;intron_variant&NMD_transcript_variant	3	97500976	G	T	3.77413e-05	1	172225	ADD	3.67439	1.31387	7.82112	2.28702	NA	CD
3:97503432:C:G	3	97503432	C	G	EPHA6	intron_variant;intron_variant&NMD_transcript_variant	intron_variant	modifier	intron_variant	NA	NA	NA	NA	NA	NA	NA	NA	NA	intron_variant;intron_variant&NMD_transcript_variant	3	97503432	C	G	1.74191e-05	1	172225	ADD	3.7653	1.34496	7.83756	2.29097	NA	CD
3:97503432:C:G	3	97503432	C	G	EPHA6	intron_variant;intron_variant&NMD_transcript_variant	intron_variant	modifier	intron_variant	NA	NA	NA	NA	NA	NA	NA	NA	NA	intron_variant;intron_variant&NMD_transcript_variant	3	97503432	C	G	1.74191e-05	1	172225	ADD	3.6431	1.06919	11.6101	3.18312	NA	UC
3:97503470:A:G	3	97503470	A	G	EPHA6	intron_variant;intron_variant&NMD_transcript_variant	intron_variant	modifier	intron_variant	NA	NA	NA	NA	NA	NA	NA	NA	NA	intron_variant;intron_variant&NMD_transcript_variant	3	97503470	A	G	2.90318e-05	1	172225	ADD	3.65678	1.36707	7.15514	2.12639	NA	CD
3:97503490:C:T	3	97503490	C	T	EPHA6	intron_variant;intron_variant&NMD_transcript_variant	intron_variant	modifier	intron_variant	NA	NA	NA	NA	NA	NA	NA	NA	NA	intron_variant;intron_variant&NMD_transcript_variant	3	97503490	C	T	1.16127e-05	1	172225	ADD	3.40318	1.31555	6.69196	2.01391	NA	UC
3:97503614:A:G	3	97503614	A	G	EPHA6	intron_variant;intron_variant&NMD_transcript_variant	intron_variant	modifier	intron_variant	NA	NA	NA	NA	NA	NA	NA	NA	NA	intron_variant;intron_variant&NMD_transcript_variant	3	97503614	A	G	8.70954e-06	1	172225	ADD	4.09405	1.45301	7.93911	2.31536	NA	UC
3:97503865:G:T	3	97503865	G	T	EPHA6	intron_variant;intron_variant&NMD_transcript_variant	intron_variant	modifier	intron_variant	NA	NA	NA	NA	NA	NA	NA	NA	NA	intron_variant;intron_variant&NMD_transcript_variant	3	97503865	G	T	8.70954e-06	1	172225	ADD	5.32123	1.55911	11.6485	3.19211	NA	CD
3:97503865:G:T	3	97503865	G	T	EPHA6	intron_variant;intron_variant&NMD_transcript_variant	intron_variant	modifier	intron_variant	NA	NA	NA	NA	NA	NA	NA	NA	NA	intron_variant;intron_variant&NMD_transcript_variant	3	97503865	G	T	8.70954e-06	1	172225	ADD	4.37596	1.46598	8.91025	2.54733	NA	UC
3:97511830:A:G	3	97511830	A	G	EPHA6	intron_variant;intron_variant&NMD_transcript_variant	intron_variant	modifier	intron_variant	NA	NA	NA	NA	NA	NA	NA	NA	NA	intron_variant;intron_variant&NMD_transcript_variant	3	97511830	A	G	8.70954e-06	1	172225	ADD	3.93816	1.48234	7.05812	2.10289	NA	UC
3:97512094:C:T	3	97512094	C	T	EPHA6	intron_variant;intron_variant&NMD_transcript_variant	intron_variant	modifier	intron_variant	NA	NA	NA	NA	NA	NA	NA	NA	NA	intron_variant;intron_variant&NMD_transcript_variant	3	97512094	C	T	1.45159e-05	1	172225	ADD	3.48189	1.31689	6.99086	2.08657	NA	UC
3:97512191:T:C	3	97512191	T	C	EPHA6	intron_variant;intron_variant&NMD_transcript_variant	intron_variant	modifier	intron_variant	NA	NA	NA	NA	NA	NA	NA	NA	NA	intron_variant;intron_variant&NMD_transcript_variant	3	97512191	T	C	0.000211932	1	172225	ADD	2.03454	0.731017	7.746	2.26896	NA	CD
3:97512874:T:C	3	97512874	T	C	EPHA6	intron_variant;intron_variant&NMD_transcript_variant	intron_variant	modifier	intron_variant	NA	NA	NA	NA	NA	NA	NA	NA	NA	intron_variant;intron_variant&NMD_transcript_variant	3	97512874	T	C	3.1935e-05	1	172225	ADD	3.15209	0.996928	9.99696	2.80466	NA	UC
3:97513012:T:C	3	97513012	T	C	EPHA6	intron_variant;intron_variant&NMD_transcript_variant	intron_variant	modifier	intron_variant	NA	NA	NA	NA	NA	NA	NA	NA	NA	intron_variant;intron_variant&NMD_transcript_variant	3	97513012	T	C	0.000232254	1	172225	ADD	1.7094	0.592011	8.33734	2.41074	NA	CD
3:97513052:A:G	3	97513052	A	G	EPHA6	intron_variant;intron_variant&NMD_transcript_variant	intron_variant	modifier	intron_variant	NA	NA	NA	NA	NA	NA	NA	NA	NA	intron_variant;intron_variant&NMD_transcript_variant	3	97513052	A	G	2.90318e-05	1	172225	ADD	2.93739	0.97884	9.00535	2.56994	NA	UC
3:97515230:C:T	3	97515230	C	T	EPHA6	intron_variant;intron_variant&NMD_transcript_variant	intron_variant	modifier	intron_variant	NA	NA	NA	NA	NA	NA	NA	NA	NA	intron_variant;intron_variant&NMD_transcript_variant	3	97515230	C	T	1.16127e-05	1	172225	ADD	3.51281	1.32919	6.98444	2.08502	NA	CD
3:97515230:C:T	3	97515230	C	T	EPHA6	intron_variant;intron_variant&NMD_transcript_variant	intron_variant	modifier	intron_variant	NA	NA	NA	NA	NA	NA	NA	NA	NA	intron_variant;intron_variant&NMD_transcript_variant	3	97515230	C	T	1.16127e-05	1	172225	ADD	3.69797	1.36986	7.28741	2.15839	NA	UC
3:97515474:A:G	3	97515474	A	G	EPHA6	intron_variant;intron_variant&NMD_transcript_variant	intron_variant	modifier	intron_variant	NA	NA	NA	NA	NA	NA	NA	NA	NA	intron_variant;intron_variant&NMD_transcript_variant	3	97515474	A	G	1.16127e-05	1	172225	ADD	4.8251	1.5691	9.45612	2.67686	NA	CD
3:97515961:C:T	3	97515961	C	T	EPHA6	intron_variant;intron_variant&NMD_transcript_variant	intron_variant	modifier	intron_variant	NA	NA	NA	NA	NA	NA	NA	NA	NA	intron_variant;intron_variant&NMD_transcript_variant	3	97515961	C	T	0.000226448	1	172225	ADD	1.68213	0.614111	7.5028	2.2104	NA	UC
3:97516471:A:G	3	97516471	A	G	EPHA6	intron_variant;intron_variant&NMD_transcript_variant	intron_variant	modifier	intron_variant	NA	NA	NA	NA	NA	NA	NA	NA	NA	intron_variant;intron_variant&NMD_transcript_variant	3	97516471	A	G	8.70954e-06	1	172225	ADD	3.79309	1.4048	7.29047	2.15913	NA	CD
3:97517138:A:G	3	97517138	A	G	EPHA6	intron_variant;intron_variant&NMD_transcript_variant	intron_variant	modifier	intron_variant	NA	NA	NA	NA	NA	NA	NA	NA	NA	intron_variant;intron_variant&NMD_transcript_variant	3	97517138	A	G	0.000150965	1	172225	ADD	1.86975	0.714468	6.84861	2.05203	NA	UC
3:97521873:G:A	3	97521873	G	A	EPHA6	intron_variant;intron_variant&NMD_transcript_variant	intron_variant	modifier	intron_variant	NA	NA	NA	NA	NA	NA	NA	NA	NA	intron_variant;intron_variant&NMD_transcript_variant	3	97521873	G	A	1.45159e-05	1	172225	ADD	4.51542	1.42664	10.0177	2.80955	NA	CD
3:97526251:C:T	3	97526251	C	T	EPHA6	intron_variant;intron_variant&NMD_transcript_variant	intron_variant	modifier	intron_variant	NA	NA	NA	NA	NA	NA	NA	NA	NA	intron_variant;intron_variant&NMD_transcript_variant	3	97526251	C	T	1.74191e-05	1	172225	ADD	3.53884	1.3326	7.0522	2.10145	NA	UC
3:97526744:C:A	3	97526744	C	A	EPHA6	intron_variant;intron_variant&NMD_transcript_variant	intron_variant	modifier	intron_variant	NA	NA	NA	NA	NA	NA	NA	NA	NA	intron_variant;intron_variant&NMD_transcript_variant	3	97526744	C	A	2.03223e-05	1	172225	ADD	4.20313	1.39555	9.07104	2.58554	NA	CD
3:97528223:G:A	3	97528223	G	A	EPHA6	intron_variant;intron_variant&NMD_transcript_variant	intron_variant	modifier	intron_variant	NA	NA	NA	NA	NA	NA	NA	NA	NA	intron_variant;intron_variant&NMD_transcript_variant	3	97528223	G	A	8.70954e-06	1	172225	ADD	5.35398	1.5393	12.0978	3.29688	NA	UC
3:97528413:T:G	3	97528413	T	G	EPHA6	intron_variant;intron_variant&NMD_transcript_variant	intron_variant	modifier	intron_variant	NA	NA	NA	NA	NA	NA	NA	NA	NA	intron_variant;intron_variant&NMD_transcript_variant	3	97528413	T	G	9.29017e-05	1	172225	ADD	2.01335	0.744166	7.31978	2.16622	NA	UC
3:97528413:T:G	3	97528413	T	G	EPHA6	intron_variant;intron_variant&NMD_transcript_variant	intron_variant	modifier	intron_variant	NA	NA	NA	NA	NA	NA	NA	NA	NA	intron_variant;intron_variant&NMD_transcript_variant	3	97528413	T	G	9.29017e-05	1	172225	ADD	2.70057	0.933183	8.37487	2.41971	NA	CD
3:97528562:T:C	3	97528562	T	C	EPHA6	intron_variant;intron_variant&NMD_transcript_variant	intron_variant	modifier	intron_variant	NA	NA	NA	NA	NA	NA	NA	NA	NA	intron_variant;intron_variant&NMD_transcript_variant	3	97528562	T	C	2.03223e-05	1	172225	ADD	3.47781	1.32534	6.88584	2.06108	NA	CD
3:97528821:G:A	3	97528821	G	A	EPHA6	intron_variant;intron_variant&NMD_transcript_variant	intron_variant	modifier	intron_variant	NA	NA	NA	NA	NA	NA	NA	NA	NA	intron_variant;intron_variant&NMD_transcript_variant	3	97528821	G	A	1.16127e-05	1	172225	ADD	3.43777	1.32804	6.70089	2.01608	NA	UC
3:97529120:A:C	3	97529120	A	C	EPHA6	intron_variant;intron_variant&NMD_transcript_variant	intron_variant	modifier	intron_variant	NA	NA	NA	NA	NA	NA	NA	NA	NA	intron_variant;intron_variant&NMD_transcript_variant	3	97529120	A	C	1.74191e-05	1	172225	ADD	4.67219	1.43634	10.581	2.94211	NA	CD
3:97529436:GA:G	3	97529436	GA	G	EPHA6	intron_variant;intron_variant&NMD_transcript_variant	intron_variant	modifier	intron_variant	NA	NA	NA	NA	NA	NA	NA	NA	NA	intron_variant;intron_variant&NMD_transcript_variant	3	97529436	GA	G	1.74191e-05	1	172225	ADD	3.87253	1.35052	8.2222	2.3832	NA	UC
3:97529481:A:G	3	97529481	A	G	EPHA6	intron_variant;intron_variant&NMD_transcript_variant	intron_variant	modifier	intron_variant	NA	NA	NA	NA	NA	NA	NA	NA	NA	intron_variant;intron_variant&NMD_transcript_variant	3	97529481	A	G	1.16127e-05	1	172225	ADD	3.92626	1.37516	8.15178	2.36634	NA	UC
3:97529481:A:G	3	97529481	A	G	EPHA6	intron_variant;intron_variant&NMD_transcript_variant	intron_variant	modifier	intron_variant	NA	NA	NA	NA	NA	NA	NA	NA	NA	intron_variant;intron_variant&NMD_transcript_variant	3	97529481	A	G	1.16127e-05	1	172225	ADD	3.8093	1.36518	7.78591	2.27856	NA	CD
3:97529761:T:TA	3	97529761	T	TA	EPHA6	intron_variant;intron_variant&NMD_transcript_variant	intron_variant	modifier	intron_variant	NA	NA	NA	NA	NA	NA	NA	NA	NA	intron_variant;intron_variant&NMD_transcript_variant	3	97529761	T	TA	8.70954e-06	1	172225	ADD	4.34832	1.44549	9.04921	2.58036	NA	CD
3:97530156:C:G	3	97530156	C	G	EPHA6	intron_variant;intron_variant&NMD_transcript_variant	intron_variant	modifier	intron_variant	NA	NA	NA	NA	NA	NA	NA	NA	NA	intron_variant;intron_variant&NMD_transcript_variant	3	97530156	C	G	1.16127e-05	1	172225	ADD	3.89849	1.38891	7.87858	2.30082	NA	UC
3:97530565:A:C	3	97530565	A	C	EPHA6	intron_variant;intron_variant&NMD_transcript_variant	intron_variant	modifier	intron_variant	NA	NA	NA	NA	NA	NA	NA	NA	NA	intron_variant;intron_variant&NMD_transcript_variant	3	97530565	A	C	3.77413e-05	1	172225	ADD	3.29082	1.26793	6.73619	2.02468	NA	CD
3:97530603:A:G	3	97530603	A	G	EPHA6	intron_variant;intron_variant&NMD_transcript_variant	intron_variant	modifier	intron_variant	NA	NA	NA	NA	NA	NA	NA	NA	NA	intron_variant;intron_variant&NMD_transcript_variant	3	97530603	A	G	0.00297866	1	172225	ADD	-2.46634	0.802173	9.45296	2.67611	NA	CD
3:97530808:G:T	3	97530808	G	T	EPHA6	intron_variant;intron_variant&NMD_transcript_variant	intron_variant	modifier	intron_variant	NA	NA	NA	NA	NA	NA	NA	NA	NA	intron_variant;intron_variant&NMD_transcript_variant	3	97530808	G	T	1.16127e-05	1	172225	ADD	3.61831	1.3463	7.22312	2.14284	NA	UC
3:97531970:G:T	3	97531970	G	T	EPHA6	intron_variant;intron_variant&NMD_transcript_variant	intron_variant	modifier	intron_variant	NA	NA	NA	NA	NA	NA	NA	NA	NA	intron_variant;intron_variant&NMD_transcript_variant	3	97531970	G	T	8.70954e-06	1	172225	ADD	5.86833	1.61564	13.1929	3.55128	NA	CD
3:97533132:C:T	3	97533132	C	T	EPHA6	intron_variant;intron_variant&NMD_transcript_variant	intron_variant	modifier	intron_variant	NA	NA	NA	NA	NA	NA	NA	NA	NA	intron_variant;intron_variant&NMD_transcript_variant	3	97533132	C	T	1.74191e-05	1	172225	ADD	3.84941	1.36164	7.99211	2.32807	NA	CD
3:97533456:C:T	3	97533456	C	T	EPHA6	intron_variant;intron_variant&NMD_transcript_variant	intron_variant	modifier	intron_variant	NA	NA	NA	NA	NA	NA	NA	NA	NA	intron_variant;intron_variant&NMD_transcript_variant	3	97533456	C	T	1.16127e-05	1	172225	ADD	4.04237	1.38779	8.48453	2.4459	NA	UC
3:97533505:G:T	3	97533505	G	T	EPHA6	intron_variant;intron_variant&NMD_transcript_variant	intron_variant	modifier	intron_variant	NA	NA	NA	NA	NA	NA	NA	NA	NA	intron_variant;intron_variant&NMD_transcript_variant	3	97533505	G	T	8.70954e-06	1	172225	ADD	5.35716	1.25114	18.334	4.73196	NA	UC
3:97534546:TAAC:T	3	97534546	TAAC	T	EPHA6	intron_variant;intron_variant&NMD_transcript_variant	intron_variant	modifier	intron_variant	NA	NA	NA	NA	NA	NA	NA	NA	NA	intron_variant;intron_variant&NMD_transcript_variant	3	97534546	TAAC	T	8.41922e-05	1	172225	ADD	2.83319	0.936241	9.15752	2.60608	NA	CD
3:97536421:T:C	3	97536421	T	C	EPHA6	intron_variant;intron_variant&NMD_transcript_variant	intron_variant	modifier	intron_variant	NA	NA	NA	NA	NA	NA	NA	NA	NA	intron_variant;intron_variant&NMD_transcript_variant	3	97536421	T	C	0.000142256	1	172225	ADD	2.32869	0.889576	6.85263	2.053	NA	CD
3:97540243:G:T	3	97540243	G	T	EPHA6	intron_variant;intron_variant&NMD_transcript_variant	intron_variant	modifier	intron_variant	NA	NA	NA	NA	NA	NA	NA	NA	NA	intron_variant;intron_variant&NMD_transcript_variant	3	97540243	G	T	1.16127e-05	1	172225	ADD	3.70371	1.36432	7.36958	2.17825	NA	UC
3:97540933:T:G	3	97540933	T	G	EPHA6	intron_variant;intron_variant&NMD_transcript_variant	intron_variant	modifier	intron_variant	NA	NA	NA	NA	NA	NA	NA	NA	NA	intron_variant;intron_variant&NMD_transcript_variant	3	97540933	T	G	8.70954e-06	1	172225	ADD	4.19022	1.41525	8.76616	2.51304	NA	UC
3:97540957:G:A	3	97540957	G	A	EPHA6	intron_variant;intron_variant&NMD_transcript_variant	intron_variant	modifier	intron_variant	NA	NA	NA	NA	NA	NA	NA	NA	NA	intron_variant;intron_variant&NMD_transcript_variant	3	97540957	G	A	2.32254e-05	1	172225	ADD	3.61113	1.34532	7.20498	2.13846	NA	CD
3:97541067:C:A	3	97541067	C	A	EPHA6	intron_variant;intron_variant&NMD_transcript_variant	intron_variant	modifier	intron_variant	NA	NA	NA	NA	NA	NA	NA	NA	NA	intron_variant;intron_variant&NMD_transcript_variant	3	97541067	C	A	8.70954e-06	1	172225	ADD	3.90342	1.41278	7.63384	2.24197	NA	CD
3:97541105:C:T	3	97541105	C	T	EPHA6	intron_variant;intron_variant&NMD_transcript_variant	intron_variant	modifier	intron_variant	NA	NA	NA	NA	NA	NA	NA	NA	NA	intron_variant;intron_variant&NMD_transcript_variant	3	97541105	C	T	8.70954e-06	1	172225	ADD	4.31438	1.47183	8.59256	2.47168	NA	UC
3:97541105:C:T	3	97541105	C	T	EPHA6	intron_variant;intron_variant&NMD_transcript_variant	intron_variant	modifier	intron_variant	NA	NA	NA	NA	NA	NA	NA	NA	NA	intron_variant;intron_variant&NMD_transcript_variant	3	97541105	C	T	8.70954e-06	1	172225	ADD	5.71073	1.57487	13.1491	3.54112	NA	CD
3:97549816:TAATAAAATAA:T	3	97549816	TAATAAAATAA	T	EPHA6	intron_variant;intron_variant&NMD_transcript_variant	intron_variant	modifier	intron_variant	NA	NA	NA	NA	NA	NA	NA	NA	NA	intron_variant;intron_variant&NMD_transcript_variant	3	97549816	TAATAAAATAA	T	8.70954e-06	1	172225	ADD	3.73248	1.39407	7.16842	2.12961	NA	CD
3:97550844:G:T	3	97550844	G	T	EPHA6	intron_variant;intron_variant&NMD_transcript_variant	intron_variant	modifier	intron_variant	NA	NA	NA	NA	NA	NA	NA	NA	NA	intron_variant;intron_variant&NMD_transcript_variant	3	97550844	G	T	5.22572e-05	1	172225	ADD	3.0783	0.979717	9.87235	2.77526	NA	CD
3:97551827:T:C	3	97551827	T	C	EPHA6	intron_variant;intron_variant&NMD_transcript_variant	intron_variant	modifier	intron_variant	NA	NA	NA	NA	NA	NA	NA	NA	NA	intron_variant;intron_variant&NMD_transcript_variant	3	97551827	T	C	2.32254e-05	1	172225	ADD	4.79771	1.139	17.7428	4.59709	NA	CD
3:97552427:G:C	3	97552427	G	C	EPHA6	intron_variant;intron_variant&NMD_transcript_variant	intron_variant	modifier	intron_variant	NA	NA	NA	NA	NA	NA	NA	NA	NA	intron_variant;intron_variant&NMD_transcript_variant	3	97552427	G	C	2.03223e-05	1	172225	ADD	3.40792	1.30868	6.78134	2.03567	NA	UC
3:97554149:AT:A	3	97554149	AT	A	EPHA6	intron_variant;intron_variant&NMD_transcript_variant	intron_variant	modifier	intron_variant	NA	NA	NA	NA	NA	NA	NA	NA	NA	intron_variant;intron_variant&NMD_transcript_variant	3	97554149	AT	A	0.000124837	1	172225	ADD	2.24712	0.743729	9.129	2.59931	NA	UC
3:97554710:G:A	3	97554710	G	A	EPHA6	intron_variant;intron_variant&NMD_transcript_variant	intron_variant	modifier	intron_variant	NA	NA	NA	NA	NA	NA	NA	NA	NA	intron_variant;intron_variant&NMD_transcript_variant	3	97554710	G	A	1.45159e-05	1	172225	ADD	3.92256	1.41795	7.6527	2.24651	NA	CD
3:97557827:A:G	3	97557827	A	G	EPHA6	intron_variant;intron_variant&NMD_transcript_variant	intron_variant	modifier	intron_variant	NA	NA	NA	NA	NA	NA	NA	NA	NA	intron_variant;intron_variant&NMD_transcript_variant	3	97557827	A	G	8.70954e-06	1	172225	ADD	4.62283	1.46933	9.89865	2.78146	NA	CD
3:97558319:A:G	3	97558319	A	G	EPHA6	intron_variant;intron_variant&NMD_transcript_variant	intron_variant	modifier	intron_variant	NA	NA	NA	NA	NA	NA	NA	NA	NA	intron_variant;intron_variant&NMD_transcript_variant	3	97558319	A	G	1.16127e-05	1	172225	ADD	4.61296	1.46079	9.97207	2.79879	NA	CD
3:97558340:C:T	3	97558340	C	T	EPHA6	intron_variant;intron_variant&NMD_transcript_variant	intron_variant	modifier	intron_variant	NA	NA	NA	NA	NA	NA	NA	NA	NA	intron_variant;intron_variant&NMD_transcript_variant	3	97558340	C	T	1.45159e-05	1	172225	ADD	3.92052	1.37221	8.16294	2.36901	NA	UC
3:97558508:G:A	3	97558508	G	A	EPHA6	intron_variant;intron_variant&NMD_transcript_variant	intron_variant	modifier	intron_variant	NA	NA	NA	NA	NA	NA	NA	NA	NA	intron_variant;intron_variant&NMD_transcript_variant	3	97558508	G	A	1.74191e-05	1	172225	ADD	4.1641	1.39314	8.93407	2.553	NA	CD
3:97558602:A:G	3	97558602	A	G	EPHA6	intron_variant;intron_variant&NMD_transcript_variant	intron_variant	modifier	intron_variant	NA	NA	NA	NA	NA	NA	NA	NA	NA	intron_variant;intron_variant&NMD_transcript_variant	3	97558602	A	G	8.70954e-06	1	172225	ADD	3.94787	1.41608	7.77235	2.2753	NA	UC
3:97558633:A:C	3	97558633	A	C	EPHA6	intron_variant;intron_variant&NMD_transcript_variant	intron_variant	modifier	intron_variant	NA	NA	NA	NA	NA	NA	NA	NA	NA	intron_variant;intron_variant&NMD_transcript_variant	3	97558633	A	C	1.74191e-05	1	172225	ADD	3.37316	1.29195	6.81684	2.0443	NA	UC
3:97558633:A:C	3	97558633	A	C	EPHA6	intron_variant;intron_variant&NMD_transcript_variant	intron_variant	modifier	intron_variant	NA	NA	NA	NA	NA	NA	NA	NA	NA	intron_variant;intron_variant&NMD_transcript_variant	3	97558633	A	C	1.74191e-05	1	172225	ADD	3.87523	1.38239	7.85838	2.29597	NA	CD
3:97559103:G:A	3	97559103	G	A	EPHA6	intron_variant;intron_variant&NMD_transcript_variant	intron_variant	modifier	intron_variant	NA	NA	NA	NA	NA	NA	NA	NA	NA	intron_variant;intron_variant&NMD_transcript_variant	3	97559103	G	A	2.90318e-05	1	172225	ADD	3.59874	1.3126	7.51685	2.21378	NA	CD
3:97560609:CT:C	3	97560609	CT	C	EPHA6	intron_variant;intron_variant&NMD_transcript_variant	intron_variant	modifier	intron_variant	NA	NA	NA	NA	NA	NA	NA	NA	NA	intron_variant;intron_variant&NMD_transcript_variant	3	97560609	CT	C	1.16127e-05	1	172225	ADD	3.51842	1.34096	6.88439	2.06072	NA	UC
3:97564304:C:A	3	97564304	C	A	EPHA6	intron_variant;intron_variant&NMD_transcript_variant	intron_variant	modifier	intron_variant	NA	NA	NA	NA	NA	NA	NA	NA	NA	intron_variant;intron_variant&NMD_transcript_variant	3	97564304	C	A	1.16127e-05	1	172225	ADD	3.85301	1.38058	7.78893	2.27929	NA	UC
3:97565076:C:T	3	97565076	C	T	EPHA6	intron_variant;intron_variant&NMD_transcript_variant	intron_variant	modifier	intron_variant	NA	NA	NA	NA	NA	NA	NA	NA	NA	intron_variant;intron_variant&NMD_transcript_variant	3	97565076	C	T	1.16127e-05	1	172225	ADD	3.64244	1.35468	7.22956	2.1444	NA	UC
3:97565211:TG:T	3	97565211	TG	T	EPHA6	intron_variant;intron_variant&NMD_transcript_variant	intron_variant	modifier	intron_variant	NA	NA	NA	NA	NA	NA	NA	NA	NA	intron_variant;intron_variant&NMD_transcript_variant	3	97565211	TG	T	2.90318e-05	1	172225	ADD	3.64105	1.33413	7.44831	2.19725	NA	CD
3:97565285:A:G	3	97565285	A	G	EPHA6	intron_variant;intron_variant&NMD_transcript_variant	intron_variant	modifier	intron_variant	NA	NA	NA	NA	NA	NA	NA	NA	NA	intron_variant;intron_variant&NMD_transcript_variant	3	97565285	A	G	8.70954e-06	1	172225	ADD	4.6297	1.52074	9.26819	2.63233	NA	CD
3:97565440:A:G	3	97565440	A	G	EPHA6	intron_variant;intron_variant&NMD_transcript_variant	intron_variant	modifier	intron_variant	NA	NA	NA	NA	NA	NA	NA	NA	NA	intron_variant;intron_variant&NMD_transcript_variant	3	97565440	A	G	2.03223e-05	1	172225	ADD	3.52007	1.30727	7.25061	2.14949	NA	CD
3:97565457:G:T	3	97565457	G	T	EPHA6	intron_variant;intron_variant&NMD_transcript_variant	intron_variant	modifier	intron_variant	NA	NA	NA	NA	NA	NA	NA	NA	NA	intron_variant;intron_variant&NMD_transcript_variant	3	97565457	G	T	0.000264189	1	172225	ADD	2.34296	0.600853	15.2052	4.01576	NA	CD
3:97567307:G:A	3	97567307	G	A	EPHA6	intron_variant;intron_variant&NMD_transcript_variant	intron_variant	modifier	intron_variant	NA	NA	NA	NA	NA	NA	NA	NA	NA	intron_variant;intron_variant&NMD_transcript_variant	3	97567307	G	A	2.32254e-05	1	172225	ADD	3.8056	1.36717	7.74822	2.2695	NA	CD
3:97567385:A:G	3	97567385	A	G	EPHA6	intron_variant;intron_variant&NMD_transcript_variant	intron_variant	modifier	intron_variant	NA	NA	NA	NA	NA	NA	NA	NA	NA	intron_variant;intron_variant&NMD_transcript_variant	3	97567385	A	G	2.32254e-05	1	172225	ADD	3.90753	1.35843	8.27427	2.39566	NA	CD
3:97567457:T:G	3	97567457	T	G	EPHA6	intron_variant;intron_variant&NMD_transcript_variant	intron_variant	modifier	intron_variant	NA	NA	NA	NA	NA	NA	NA	NA	NA	intron_variant;intron_variant&NMD_transcript_variant	3	97567457	T	G	1.74191e-05	1	172225	ADD	3.46144	1.31478	6.93119	2.07209	NA	UC
3:97569729:G:T	3	97569729	G	T	EPHA6	intron_variant;intron_variant&NMD_transcript_variant	intron_variant	modifier	intron_variant	NA	NA	NA	NA	NA	NA	NA	NA	NA	intron_variant;intron_variant&NMD_transcript_variant	3	97569729	G	T	0.000110321	1	172225	ADD	2.28085	0.883722	6.66133	2.00644	NA	CD
3:97569983:T:C	3	97569983	T	C	EPHA6	intron_variant;intron_variant&NMD_transcript_variant	intron_variant	modifier	intron_variant	NA	NA	NA	NA	NA	NA	NA	NA	NA	intron_variant;intron_variant&NMD_transcript_variant	3	97569983	T	C	1.16127e-05	1	172225	ADD	4.03989	1.39876	8.34164	2.41177	NA	CD
3:97570071:A:G	3	97570071	A	G	EPHA6	intron_variant;intron_variant&NMD_transcript_variant	intron_variant	modifier	intron_variant	NA	NA	NA	NA	NA	NA	NA	NA	NA	intron_variant;intron_variant&NMD_transcript_variant	3	97570071	A	G	8.70954e-06	1	172225	ADD	3.96527	1.47683	7.20914	2.13946	NA	CD
3:97571436:A:T	3	97571436	A	T	EPHA6	intron_variant;intron_variant&NMD_transcript_variant	intron_variant	modifier	intron_variant	NA	NA	NA	NA	NA	NA	NA	NA	NA	intron_variant;intron_variant&NMD_transcript_variant	3	97571436	A	T	8.70954e-06	1	172225	ADD	3.55679	1.36523	6.78745	2.03715	NA	UC
3:97573180:T:A	3	97573180	T	A	EPHA6	intron_variant;intron_variant&NMD_transcript_variant	intron_variant	modifier	intron_variant	NA	NA	NA	NA	NA	NA	NA	NA	NA	intron_variant;intron_variant&NMD_transcript_variant	3	97573180	T	A	8.70954e-06	1	172225	ADD	4.41675	1.45825	9.17363	2.6099	NA	UC
3:97574148:A:G	3	97574148	A	G	EPHA6	intron_variant;intron_variant&NMD_transcript_variant	intron_variant	modifier	intron_variant	NA	NA	NA	NA	NA	NA	NA	NA	NA	intron_variant;intron_variant&NMD_transcript_variant	3	97574148	A	G	8.70954e-06	1	172225	ADD	4.71041	1.49861	9.87964	2.77698	NA	UC
3:97576768:T:C	3	97576768	T	C	EPHA6	intron_variant;intron_variant&NMD_transcript_variant	intron_variant	modifier	intron_variant	NA	NA	NA	NA	NA	NA	NA	NA	NA	intron_variant;intron_variant&NMD_transcript_variant	3	97576768	T	C	2.03223e-05	1	172225	ADD	3.40467	1.29026	6.96297	2.0798	NA	UC
3:97577894:C:T	3	97577894	C	T	EPHA6	intron_variant;intron_variant&NMD_transcript_variant	intron_variant	modifier	intron_variant	NA	NA	NA	NA	NA	NA	NA	NA	NA	intron_variant;intron_variant&NMD_transcript_variant	3	97577894	C	T	1.74191e-05	1	172225	ADD	4.699	1.45383	10.4468	2.91059	NA	CD
3:97580773:G:A	3	97580773	G	A	EPHA6	intron_variant;intron_variant&NMD_transcript_variant	intron_variant	modifier	intron_variant	NA	NA	NA	NA	NA	NA	NA	NA	NA	intron_variant;intron_variant&NMD_transcript_variant	3	97580773	G	A	1.74191e-05	1	172225	ADD	3.79475	1.34443	7.96694	2.32203	NA	CD
3:97580781:T:C	3	97580781	T	C	EPHA6	intron_variant;intron_variant&NMD_transcript_variant	intron_variant	modifier	intron_variant	NA	NA	NA	NA	NA	NA	NA	NA	NA	intron_variant;intron_variant&NMD_transcript_variant	3	97580781	T	C	8.70954e-06	1	172225	ADD	3.961	1.39557	8.05579	2.34334	NA	UC
3:97580941:A:T	3	97580941	A	T	EPHA6	intron_variant;intron_variant&NMD_transcript_variant	intron_variant	modifier	intron_variant	NA	NA	NA	NA	NA	NA	NA	NA	NA	intron_variant;intron_variant&NMD_transcript_variant	3	97580941	A	T	1.74191e-05	1	172225	ADD	3.46144	1.31478	6.93119	2.07209	NA	UC
3:97583046:C:T	3	97583046	C	T	EPHA6	intron_variant;intron_variant&NMD_transcript_variant	intron_variant	modifier	intron_variant	NA	NA	NA	NA	NA	NA	NA	NA	NA	intron_variant;intron_variant&NMD_transcript_variant	3	97583046	C	T	1.45159e-05	1	172225	ADD	4.61723	1.4496	10.1454	2.83964	NA	CD
3:97584671:G:A	3	97584671	G	A	EPHA6	intron_variant;intron_variant&NMD_transcript_variant	intron_variant	modifier	intron_variant	NA	NA	NA	NA	NA	NA	NA	NA	NA	intron_variant;intron_variant&NMD_transcript_variant	3	97584671	G	A	2.32254e-05	1	172225	ADD	3.70393	1.32698	7.79103	2.27979	NA	CD
3:97585147:A:G	3	97585147	A	G	EPHA6	intron_variant;intron_variant&NMD_transcript_variant	intron_variant	modifier	intron_variant	NA	NA	NA	NA	NA	NA	NA	NA	NA	intron_variant;intron_variant&NMD_transcript_variant	3	97585147	A	G	8.70954e-06	1	172225	ADD	5.20601	1.54021	11.4248	3.13983	NA	UC
3:97585544:T:C	3	97585544	T	C	EPHA6	intron_variant;intron_variant&NMD_transcript_variant	intron_variant	modifier	intron_variant	NA	NA	NA	NA	NA	NA	NA	NA	NA	intron_variant;intron_variant&NMD_transcript_variant	3	97585544	T	C	3.1935e-05	1	172225	ADD	3.26495	0.993515	10.7995	2.99343	NA	UC
3:97585544:T:C	3	97585544	T	C	EPHA6	intron_variant;intron_variant&NMD_transcript_variant	intron_variant	modifier	intron_variant	NA	NA	NA	NA	NA	NA	NA	NA	NA	intron_variant;intron_variant&NMD_transcript_variant	3	97585544	T	C	3.1935e-05	1	172225	ADD	3.66012	1.06165	11.8858	3.24747	NA	CD
3:97585678:G:T	3	97585678	G	T	EPHA6	intron_variant;intron_variant&NMD_transcript_variant	intron_variant	modifier	intron_variant	NA	NA	NA	NA	NA	NA	NA	NA	NA	intron_variant;intron_variant&NMD_transcript_variant	3	97585678	G	T	1.74191e-05	1	172225	ADD	4.03852	1.36899	8.70245	2.49787	NA	CD
3:97586195:C:T	3	97586195	C	T	EPHA6	intron_variant;intron_variant&NMD_transcript_variant	intron_variant	modifier	intron_variant	NA	NA	NA	NA	NA	NA	NA	NA	NA	intron_variant;intron_variant&NMD_transcript_variant	3	97586195	C	T	1.45159e-05	1	172225	ADD	3.70756	1.4244	6.77505	2.03414	NA	CD
3:97587963:G:T	3	97587963	G	T	EPHA6	intron_variant;intron_variant&NMD_transcript_variant	intron_variant	modifier	intron_variant	NA	NA	NA	NA	NA	NA	NA	NA	NA	intron_variant;intron_variant&NMD_transcript_variant	3	97587963	G	T	1.45159e-05	1	172225	ADD	3.5628	1.36309	6.83179	2.04794	NA	UC
3:97588865:AT:A	3	97588865	AT	A	EPHA6	intron_variant;intron_variant&NMD_transcript_variant	intron_variant	modifier	intron_variant	NA	NA	NA	NA	NA	NA	NA	NA	NA	intron_variant;intron_variant&NMD_transcript_variant	3	97588865	AT	A	1.16127e-05	1	172225	ADD	5.23633	1.10763	22.3493	5.64341	NA	UC
3:97588865:AT:A	3	97588865	AT	A	EPHA6	intron_variant;intron_variant&NMD_transcript_variant	intron_variant	modifier	intron_variant	NA	NA	NA	NA	NA	NA	NA	NA	NA	intron_variant;intron_variant&NMD_transcript_variant	3	97588865	AT	A	1.16127e-05	1	172225	ADD	4.43785	1.44319	9.4558	2.67679	NA	CD
3:97589385:C:A	3	97589385	C	A	EPHA6	intron_variant;intron_variant&NMD_transcript_variant	intron_variant	modifier	intron_variant	NA	NA	NA	NA	NA	NA	NA	NA	NA	intron_variant;intron_variant&NMD_transcript_variant	3	97589385	C	A	8.70954e-06	1	172225	ADD	3.55845	1.3651	6.79504	2.039	NA	UC
3:97589479:T:A	3	97589479	T	A	EPHA6	intron_variant;intron_variant&NMD_transcript_variant	intron_variant	modifier	intron_variant	NA	NA	NA	NA	NA	NA	NA	NA	NA	intron_variant;intron_variant&NMD_transcript_variant	3	97589479	T	A	1.45159e-05	1	172225	ADD	4.52224	1.43796	9.89048	2.77954	NA	CD
3:97590150:T:C	3	97590150	T	C	EPHA6	intron_variant;intron_variant&NMD_transcript_variant	intron_variant	modifier	intron_variant	NA	NA	NA	NA	NA	NA	NA	NA	NA	intron_variant;intron_variant&NMD_transcript_variant	3	97590150	T	C	1.45159e-05	1	172225	ADD	4.70777	1.44929	10.5516	2.93521	NA	CD
3:97592964:C:T	3	97592964	C	T	EPHA6	intron_variant;intron_variant&NMD_transcript_variant	intron_variant	modifier	intron_variant	NA	NA	NA	NA	NA	NA	NA	NA	NA	intron_variant;intron_variant&NMD_transcript_variant	3	97592964	C	T	8.70954e-06	1	172225	ADD	3.76299	1.4013	7.21109	2.13994	NA	UC
3:97593127:T:C	3	97593127	T	C	EPHA6	intron_variant;intron_variant&NMD_transcript_variant	intron_variant	modifier	intron_variant	NA	NA	NA	NA	NA	NA	NA	NA	NA	intron_variant;intron_variant&NMD_transcript_variant	3	97593127	T	C	1.16127e-05	1	172225	ADD	4.21956	1.43002	8.70662	2.49886	NA	CD
3:97594427:A:G	3	97594427	A	G	EPHA6	intron_variant;intron_variant&NMD_transcript_variant	intron_variant	modifier	intron_variant	NA	NA	NA	NA	NA	NA	NA	NA	NA	intron_variant;intron_variant&NMD_transcript_variant	3	97594427	A	G	1.16127e-05	1	172225	ADD	3.61008	1.36108	7.03507	2.0973	NA	CD
3:97594507:A:T	3	97594507	A	T	EPHA6	intron_variant;intron_variant&NMD_transcript_variant	intron_variant	modifier	intron_variant	NA	NA	NA	NA	NA	NA	NA	NA	NA	intron_variant;intron_variant&NMD_transcript_variant	3	97594507	A	T	1.16127e-05	1	172225	ADD	4.30796	1.41483	9.2712	2.63304	NA	UC
3:97596234:C:T	3	97596234	C	T	EPHA6	intron_variant;intron_variant&NMD_transcript_variant	intron_variant	modifier	intron_variant	NA	NA	NA	NA	NA	NA	NA	NA	NA	intron_variant;intron_variant&NMD_transcript_variant	3	97596234	C	T	0.00132966	1	172225	ADD	-2.40067	0.850643	7.96468	2.32149	NA	UC
3:97596771:C:T	3	97596771	C	T	EPHA6	intron_variant;intron_variant&NMD_transcript_variant	intron_variant	modifier	intron_variant	NA	NA	NA	NA	NA	NA	NA	NA	NA	intron_variant;intron_variant&NMD_transcript_variant	3	97596771	C	T	8.70954e-06	1	172225	ADD	4.33646	1.52165	8.12162	2.35912	NA	CD
3:97597487:G:A	3	97597487	G	A	EPHA6	intron_variant;intron_variant&NMD_transcript_variant	intron_variant	modifier	intron_variant	NA	NA	NA	NA	NA	NA	NA	NA	NA	intron_variant;intron_variant&NMD_transcript_variant	3	97597487	G	A	1.74191e-05	1	172225	ADD	3.56626	1.3147	7.35826	2.17551	NA	UC
3:97597487:G:A	3	97597487	G	A	EPHA6	intron_variant;intron_variant&NMD_transcript_variant	intron_variant	modifier	intron_variant	NA	NA	NA	NA	NA	NA	NA	NA	NA	intron_variant;intron_variant&NMD_transcript_variant	3	97597487	G	A	1.74191e-05	1	172225	ADD	3.42695	1.3186	6.75441	2.02911	NA	CD
3:97598005:G:A	3	97598005	G	A	EPHA6	intron_variant;intron_variant&NMD_transcript_variant	intron_variant	modifier	intron_variant	NA	NA	NA	NA	NA	NA	NA	NA	NA	intron_variant;intron_variant&NMD_transcript_variant	3	97598005	G	A	2.03223e-05	1	172225	ADD	3.61711	1.32232	7.48252	2.20551	NA	CD
3:97600584:C:T	3	97600584	C	T	EPHA6	intron_variant;intron_variant&NMD_transcript_variant	intron_variant	modifier	intron_variant	NA	NA	NA	NA	NA	NA	NA	NA	NA	intron_variant;intron_variant&NMD_transcript_variant	3	97600584	C	T	0.000275802	1	172225	ADD	1.76182	0.664875	7.02168	2.09405	NA	CD
3:97601284:A:G	3	97601284	A	G	EPHA6	intron_variant;intron_variant&NMD_transcript_variant	intron_variant	modifier	intron_variant	NA	NA	NA	NA	NA	NA	NA	NA	NA	intron_variant;intron_variant&NMD_transcript_variant	3	97601284	A	G	1.74191e-05	1	172225	ADD	4.03712	1.37008	8.68269	2.49316	NA	CD
3:97602082:G:T	3	97602082	G	T	EPHA6	intron_variant;intron_variant&NMD_transcript_variant	intron_variant	modifier	intron_variant	NA	NA	NA	NA	NA	NA	NA	NA	NA	intron_variant;intron_variant&NMD_transcript_variant	3	97602082	G	T	4.64509e-05	1	172225	ADD	3.10648	0.978563	10.0776	2.82368	NA	CD
3:97603250:G:A	3	97603250	G	A	EPHA6	intron_variant;intron_variant&NMD_transcript_variant	intron_variant	modifier	intron_variant	NA	NA	NA	NA	NA	NA	NA	NA	NA	intron_variant;intron_variant&NMD_transcript_variant	3	97603250	G	A	1.45159e-05	1	172225	ADD	3.61159	1.35211	7.13461	2.12142	NA	UC
3:97603795:C:T	3	97603795	C	T	EPHA6	intron_variant;intron_variant&NMD_transcript_variant	intron_variant	modifier	intron_variant	NA	NA	NA	NA	NA	NA	NA	NA	NA	intron_variant;intron_variant&NMD_transcript_variant	3	97603795	C	T	8.70954e-06	1	172225	ADD	3.65131	1.38626	6.93757	2.07364	NA	UC
3:97603795:C:T	3	97603795	C	T	EPHA6	intron_variant;intron_variant&NMD_transcript_variant	intron_variant	modifier	intron_variant	NA	NA	NA	NA	NA	NA	NA	NA	NA	intron_variant;intron_variant&NMD_transcript_variant	3	97603795	C	T	8.70954e-06	1	172225	ADD	4.10122	1.4345	8.17381	2.37162	NA	CD
3:97604500:AT:A	3	97604500	AT	A	EPHA6	intron_variant;intron_variant&NMD_transcript_variant	intron_variant	modifier	intron_variant	NA	NA	NA	NA	NA	NA	NA	NA	NA	intron_variant;intron_variant&NMD_transcript_variant	3	97604500	AT	A	5.80636e-05	1	172225	ADD	2.96587	0.952818	9.68914	2.73198	NA	UC
3:97605138:A:C	3	97605138	A	C	EPHA6	intron_variant;intron_variant&NMD_transcript_variant	intron_variant	modifier	intron_variant	NA	NA	NA	NA	NA	NA	NA	NA	NA	intron_variant;intron_variant&NMD_transcript_variant	3	97605138	A	C	8.70954e-06	1	172225	ADD	5.75447	1.57827	13.2937	3.57463	NA	CD
3:97606990:T:A	3	97606990	T	A	EPHA6	intron_variant;intron_variant&NMD_transcript_variant	intron_variant	modifier	intron_variant	NA	NA	NA	NA	NA	NA	NA	NA	NA	intron_variant;intron_variant&NMD_transcript_variant	3	97606990	T	A	8.70954e-06	1	172225	ADD	4.74681	1.19841	15.6889	4.1269	NA	UC
3:97607255:A:G	3	97607255	A	G	EPHA6	intron_variant;intron_variant&NMD_transcript_variant	intron_variant	modifier	intron_variant	NA	NA	NA	NA	NA	NA	NA	NA	NA	intron_variant;intron_variant&NMD_transcript_variant	3	97607255	A	G	1.45159e-05	1	172225	ADD	3.50449	1.31524	7.09972	2.11297	NA	UC
3:97607340:A:C	3	97607340	A	C	EPHA6	intron_variant;intron_variant&NMD_transcript_variant	intron_variant	modifier	intron_variant	NA	NA	NA	NA	NA	NA	NA	NA	NA	intron_variant;intron_variant&NMD_transcript_variant	3	97607340	A	C	1.16127e-05	1	172225	ADD	4.36037	1.46724	8.83172	2.52865	NA	CD
3:97608513:A:C	3	97608513	A	C	EPHA6	intron_variant;intron_variant&NMD_transcript_variant	intron_variant	modifier	intron_variant	NA	NA	NA	NA	NA	NA	NA	NA	NA	intron_variant;intron_variant&NMD_transcript_variant	3	97608513	A	C	1.45159e-05	1	172225	ADD	4.55508	1.46389	9.68226	2.73036	NA	CD
3:97608676:A:G	3	97608676	A	G	EPHA6	intron_variant;intron_variant&NMD_transcript_variant	intron_variant	modifier	intron_variant	NA	NA	NA	NA	NA	NA	NA	NA	NA	intron_variant;intron_variant&NMD_transcript_variant	3	97608676	A	G	1.16127e-05	1	172225	ADD	4.2505	1.40448	9.15903	2.60644	NA	UC
3:97608844:A:G	3	97608844	A	G	EPHA6	intron_variant;intron_variant&NMD_transcript_variant	intron_variant	modifier	intron_variant	NA	NA	NA	NA	NA	NA	NA	NA	NA	intron_variant;intron_variant&NMD_transcript_variant	3	97608844	A	G	1.45159e-05	1	172225	ADD	3.39865	1.31439	6.68601	2.01246	NA	UC
3:97608852:T:C	3	97608852	T	C	EPHA6	intron_variant;intron_variant&NMD_transcript_variant	intron_variant	modifier	intron_variant	NA	NA	NA	NA	NA	NA	NA	NA	NA	intron_variant;intron_variant&NMD_transcript_variant	3	97608852	T	C	1.45159e-05	1	172225	ADD	3.39865	1.31439	6.68601	2.01246	NA	UC
3:97611294:T:C	3	97611294	T	C	EPHA6	intron_variant;intron_variant&NMD_transcript_variant;downstream_gene_variant	intron_variant	modifier	intron_variant	NA	NA	NA	NA	NA	NA	NA	NA	NA	intron_variant;intron_variant&NMD_transcript_variant;downstream_gene_variant	3	97611294	T	C	1.45159e-05	1	172225	ADD	4.14508	1.38769	8.92239	2.55022	NA	CD
3:97611925:G:A	3	97611925	G	A	EPHA6	intron_variant;intron_variant&NMD_transcript_variant;downstream_gene_variant	intron_variant	modifier	intron_variant	NA	NA	NA	NA	NA	NA	NA	NA	NA	intron_variant;intron_variant&NMD_transcript_variant;downstream_gene_variant	3	97611925	G	A	8.70954e-06	1	172225	ADD	4.06286	1.42302	8.15162	2.3663	NA	CD
3:97613010:C:T	3	97613010	C	T	EPHA6	intron_variant;intron_variant&NMD_transcript_variant;downstream_gene_variant	intron_variant	modifier	intron_variant	NA	NA	NA	NA	NA	NA	NA	NA	NA	intron_variant;intron_variant&NMD_transcript_variant;downstream_gene_variant	3	97613010	C	T	8.70954e-06	1	172225	ADD	3.90235	1.39979	7.77185	2.27518	NA	UC
3:97613010:C:T	3	97613010	C	T	EPHA6	intron_variant;intron_variant&NMD_transcript_variant;downstream_gene_variant	intron_variant	modifier	intron_variant	NA	NA	NA	NA	NA	NA	NA	NA	NA	intron_variant;intron_variant&NMD_transcript_variant;downstream_gene_variant	3	97613010	C	T	8.70954e-06	1	172225	ADD	3.9779	1.43785	7.65386	2.24679	NA	CD
3:97613339:G:C	3	97613339	G	C	EPHA6	intron_variant;intron_variant&NMD_transcript_variant;downstream_gene_variant	intron_variant	modifier	intron_variant	NA	NA	NA	NA	NA	NA	NA	NA	NA	intron_variant;intron_variant&NMD_transcript_variant;downstream_gene_variant	3	97613339	G	C	1.74191e-05	1	172225	ADD	4.19592	1.39985	8.98442	2.56497	NA	CD
3:97613415:T:G	3	97613415	T	G	EPHA6	intron_variant;intron_variant&NMD_transcript_variant;downstream_gene_variant	intron_variant	modifier	intron_variant	NA	NA	NA	NA	NA	NA	NA	NA	NA	intron_variant;intron_variant&NMD_transcript_variant;downstream_gene_variant	3	97613415	T	G	1.16127e-05	1	172225	ADD	5.21762	1.53283	11.5866	3.17764	NA	CD
3:97622027:G:A	3	97622027	G	A	EPHA6	intron_variant;intron_variant&NMD_transcript_variant	intron_variant	modifier	intron_variant	NA	NA	NA	NA	NA	NA	NA	NA	NA	intron_variant;intron_variant&NMD_transcript_variant	3	97622027	G	A	2.03223e-05	1	172225	ADD	3.61711	1.32232	7.48252	2.20551	NA	CD
3:97625831:A:G	3	97625831	A	G	EPHA6	intron_variant;intron_variant&NMD_transcript_variant	intron_variant	modifier	intron_variant	NA	NA	NA	NA	NA	NA	NA	NA	NA	intron_variant;intron_variant&NMD_transcript_variant	3	97625831	A	G	1.16127e-05	1	172225	ADD	3.74095	1.34942	7.68548	2.2544	NA	UC
3:97628321:G:A	3	97628321	G	A	EPHA6	intron_variant;intron_variant&NMD_transcript_variant	intron_variant	modifier	intron_variant	NA	NA	NA	NA	NA	NA	NA	NA	NA	intron_variant;intron_variant&NMD_transcript_variant	3	97628321	G	A	1.16127e-05	1	172225	ADD	4.08977	1.40283	8.49935	2.44944	NA	CD
3:97630359:T:C	3	97630359	T	C	EPHA6	intron_variant;intron_variant&NMD_transcript_variant	intron_variant	modifier	intron_variant	NA	NA	NA	NA	NA	NA	NA	NA	NA	intron_variant;intron_variant&NMD_transcript_variant	3	97630359	T	C	1.45159e-05	1	172225	ADD	3.69193	1.33021	7.70308	2.25864	NA	UC
3:97631008:A:G	3	97631008	A	G	EPHA6	intron_variant;intron_variant&NMD_transcript_variant	intron_variant	modifier	intron_variant	NA	NA	NA	NA	NA	NA	NA	NA	NA	intron_variant;intron_variant&NMD_transcript_variant	3	97631008	A	G	1.16127e-05	1	172225	ADD	3.94029	1.50361	6.86729	2.05657	NA	CD
3:97631008:A:G	3	97631008	A	G	EPHA6	intron_variant;intron_variant&NMD_transcript_variant	intron_variant	modifier	intron_variant	NA	NA	NA	NA	NA	NA	NA	NA	NA	intron_variant;intron_variant&NMD_transcript_variant	3	97631008	A	G	1.16127e-05	1	172225	ADD	3.51185	1.33922	6.87649	2.0588	NA	UC
3:97631869:GT:G	3	97631869	GT	G	EPHA6	intron_variant;intron_variant&NMD_transcript_variant	intron_variant	modifier	intron_variant	NA	NA	NA	NA	NA	NA	NA	NA	NA	intron_variant;intron_variant&NMD_transcript_variant	3	97631869	GT	G	8.41922e-05	1	172225	ADD	2.52676	0.906419	7.77087	2.27494	NA	UC
3:97633063:C:T	3	97633063	C	T	EPHA6	intron_variant;intron_variant&NMD_transcript_variant	intron_variant	modifier	intron_variant	NA	NA	NA	NA	NA	NA	NA	NA	NA	intron_variant;intron_variant&NMD_transcript_variant	3	97633063	C	T	4.35477e-05	1	172225	ADD	2.55735	0.960722	7.08573	2.10958	NA	UC
3:97633095:C:T	3	97633095	C	T	EPHA6	intron_variant;intron_variant&NMD_transcript_variant	intron_variant	modifier	intron_variant	NA	NA	NA	NA	NA	NA	NA	NA	NA	intron_variant;intron_variant&NMD_transcript_variant	3	97633095	C	T	2.90318e-05	1	172225	ADD	3.47205	1.29359	7.20414	2.13825	NA	CD
3:97636135:C:T	3	97636135	C	T	EPHA6	intron_variant;intron_variant&NMD_transcript_variant	intron_variant	modifier	intron_variant	NA	NA	NA	NA	NA	NA	NA	NA	NA	intron_variant;intron_variant&NMD_transcript_variant	3	97636135	C	T	8.70954e-06	1	172225	ADD	3.75127	1.37807	7.40996	2.188	NA	UC
3:97636906:T:C	3	97636906	T	C	EPHA6	intron_variant;intron_variant&NMD_transcript_variant	intron_variant	modifier	intron_variant	NA	NA	NA	NA	NA	NA	NA	NA	NA	intron_variant;intron_variant&NMD_transcript_variant	3	97636906	T	C	8.70954e-06	1	172225	ADD	3.85769	1.39461	7.6515	2.24622	NA	UC
3:97637208:T:C	3	97637208	T	C	EPHA6	intron_variant;intron_variant&NMD_transcript_variant	intron_variant	modifier	intron_variant	NA	NA	NA	NA	NA	NA	NA	NA	NA	intron_variant;intron_variant&NMD_transcript_variant	3	97637208	T	C	2.90318e-05	1	172225	ADD	3.2141	1.00486	10.2307	2.85974	NA	UC
3:97637208:T:C	3	97637208	T	C	EPHA6	intron_variant;intron_variant&NMD_transcript_variant	intron_variant	modifier	intron_variant	NA	NA	NA	NA	NA	NA	NA	NA	NA	intron_variant;intron_variant&NMD_transcript_variant	3	97637208	T	C	2.90318e-05	1	172225	ADD	3.4245	1.29898	6.95009	2.07668	NA	CD
3:97637570:T:G	3	97637570	T	G	EPHA6	intron_variant;intron_variant&NMD_transcript_variant	intron_variant	modifier	intron_variant	NA	NA	NA	NA	NA	NA	NA	NA	NA	intron_variant;intron_variant&NMD_transcript_variant	3	97637570	T	G	1.16127e-05	1	172225	ADD	3.48599	1.33457	6.82292	2.04578	NA	UC
3:97637581:T:G	3	97637581	T	G	EPHA6	intron_variant;intron_variant&NMD_transcript_variant	intron_variant	modifier	intron_variant	NA	NA	NA	NA	NA	NA	NA	NA	NA	intron_variant;intron_variant&NMD_transcript_variant	3	97637581	T	G	4.64509e-05	1	172225	ADD	3.02083	0.993328	9.24842	2.62764	NA	CD
3:97637590:C:T	3	97637590	C	T	EPHA6	intron_variant;intron_variant&NMD_transcript_variant	intron_variant	modifier	intron_variant	NA	NA	NA	NA	NA	NA	NA	NA	NA	intron_variant;intron_variant&NMD_transcript_variant	3	97637590	C	T	1.16127e-05	1	172225	ADD	3.48599	1.33457	6.82292	2.04578	NA	UC
3:97637821:G:A	3	97637821	G	A	EPHA6	intron_variant;intron_variant&NMD_transcript_variant	intron_variant	modifier	intron_variant	NA	NA	NA	NA	NA	NA	NA	NA	NA	intron_variant;intron_variant&NMD_transcript_variant	3	97637821	G	A	2.32254e-05	1	172225	ADD	3.72391	1.33204	7.81565	2.28571	NA	CD
3:97637821:G:A	3	97637821	G	A	EPHA6	intron_variant;intron_variant&NMD_transcript_variant	intron_variant	modifier	intron_variant	NA	NA	NA	NA	NA	NA	NA	NA	NA	intron_variant;intron_variant&NMD_transcript_variant	3	97637821	G	A	2.32254e-05	1	172225	ADD	3.33428	1.28819	6.6995	2.01574	NA	UC
3:97638080:A:G	3	97638080	A	G	EPHA6	missense_variant&splice_region_variant;missense_variant&splice_region_variant&NMD_transcript_variant;missense_variant&splice_region_variant;downstream_gene_variant;missense_variant&splice_region_variant	missense_variant	moderate	coding_sequence_variant	NA	NA	NA	0.479;0.479;0.479;NA;0.479	0.479	tolerated;tolerated_low_confidence;deleterious_low_confidence;NA;deleterious_low_confidence	deleterious_low_confidence	benign;benign;benign;NA;possibly_damaging	possibly_damaging	missense_variant&splice_region_variant;missense_variant&splice_region_variant&NMD_transcript_variant;missense_variant&splice_region_variant;downstream_gene_variant;missense_variant&splice_region_variant	3	97638080	A	G	1.16127e-05	1	172225	ADD	3.55731	1.35111	6.93207	2.0723	NA	UC
3:97638632:A:G	3	97638632	A	G	EPHA6	intron_variant;intron_variant&NMD_transcript_variant;downstream_gene_variant	intron_variant	modifier	intron_variant	NA	NA	NA	NA	NA	NA	NA	NA	NA	intron_variant;intron_variant&NMD_transcript_variant;downstream_gene_variant	3	97638632	A	G	2.90318e-05	1	172225	ADD	2.7676	0.966486	8.20002	2.37789	NA	UC
3:97639191:T:A	3	97639191	T	A	EPHA6	intron_variant;intron_variant&NMD_transcript_variant;downstream_gene_variant	intron_variant	modifier	intron_variant	NA	NA	NA	NA	NA	NA	NA	NA	NA	intron_variant;intron_variant&NMD_transcript_variant;downstream_gene_variant	3	97639191	T	A	1.45161e-05	1	172223	ADD	4.29982	1.43706	8.95263	2.55741	NA	CD
3:97639253:A:G	3	97639253	A	G	EPHA6	intron_variant;intron_variant&NMD_transcript_variant;downstream_gene_variant	intron_variant	modifier	intron_variant	NA	NA	NA	NA	NA	NA	NA	NA	NA	intron_variant;intron_variant&NMD_transcript_variant;downstream_gene_variant	3	97639253	A	G	8.70964e-06	1	172223	ADD	4.34874	1.44338	9.07749	2.58708	NA	UC
3:97639566:T:G	3	97639566	T	G	EPHA6	intron_variant;intron_variant&NMD_transcript_variant;downstream_gene_variant	intron_variant	modifier	intron_variant	NA	NA	NA	NA	NA	NA	NA	NA	NA	intron_variant;intron_variant&NMD_transcript_variant;downstream_gene_variant	3	97639566	T	G	8.70954e-06	1	172225	ADD	4.21065	1.42848	8.68857	2.49456	NA	UC
3:97639900:A:G	3	97639900	A	G	EPHA6	intron_variant;intron_variant&NMD_transcript_variant;downstream_gene_variant	intron_variant	modifier	intron_variant	NA	NA	NA	NA	NA	NA	NA	NA	NA	intron_variant;intron_variant&NMD_transcript_variant;downstream_gene_variant	3	97639900	A	G	8.70954e-06	1	172225	ADD	3.76383	1.40137	7.21367	2.14056	NA	UC
3:97640253:G:C	3	97640253	G	C	EPHA6	intron_variant;intron_variant&NMD_transcript_variant;downstream_gene_variant	intron_variant	modifier	intron_variant	NA	NA	NA	NA	NA	NA	NA	NA	NA	intron_variant;intron_variant&NMD_transcript_variant;downstream_gene_variant	3	97640253	G	C	8.70954e-06	1	172225	ADD	3.68578	1.39857	6.94532	2.07552	NA	UC
3:97640327:G:A	3	97640327	G	A	EPHA6	intron_variant;intron_variant&NMD_transcript_variant;downstream_gene_variant	intron_variant	modifier	intron_variant	NA	NA	NA	NA	NA	NA	NA	NA	NA	intron_variant;intron_variant&NMD_transcript_variant;downstream_gene_variant	3	97640327	G	A	1.16127e-05	1	172225	ADD	3.88638	1.37561	7.98176	2.32559	NA	UC
3:97640364:G:A	3	97640364	G	A	EPHA6	intron_variant;intron_variant&NMD_transcript_variant;downstream_gene_variant	intron_variant	modifier	intron_variant	NA	NA	NA	NA	NA	NA	NA	NA	NA	intron_variant;intron_variant&NMD_transcript_variant;downstream_gene_variant	3	97640364	G	A	2.61286e-05	1	172225	ADD	3.54213	1.3212	7.18775	2.13429	NA	CD
3:97640436:A:G	3	97640436	A	G	EPHA6	intron_variant;intron_variant&NMD_transcript_variant;downstream_gene_variant	intron_variant	modifier	intron_variant	NA	NA	NA	NA	NA	NA	NA	NA	NA	intron_variant;intron_variant&NMD_transcript_variant;downstream_gene_variant	3	97640436	A	G	1.16127e-05	1	172225	ADD	3.74566	1.38096	7.35691	2.17519	NA	UC
3:97645681:G:A	3	97645681	G	A	EPHA6	intron_variant;intron_variant&NMD_transcript_variant	intron_variant	modifier	intron_variant	NA	NA	NA	NA	NA	NA	NA	NA	NA	intron_variant;intron_variant&NMD_transcript_variant	3	97645681	G	A	1.45159e-05	1	172225	ADD	3.74975	1.34477	7.77515	2.27597	NA	UC
3:97646260:G:A	3	97646260	G	A	EPHA6	intron_variant;intron_variant&NMD_transcript_variant;missense_variant	missense_variant	moderate	coding_sequence_variant	NA	NA	NA	NA;NA;0.165	0.165	NA;NA;deleterious_low_confidence	deleterious_low_confidence	NA;NA;benign	benign	intron_variant;intron_variant&NMD_transcript_variant;missense_variant	3	97646260	G	A	1.74191e-05	1	172225	ADD	3.62418	1.35911	7.11066	2.11562	NA	UC
3:97646311:G:A	3	97646311	G	A	EPHA6	intron_variant;intron_variant&NMD_transcript_variant;splice_donor_variant	splice_donor_variant	high	intron_variant	highConf	NA	NA	NA	NA	NA	NA	NA	NA	intron_variant;intron_variant&NMD_transcript_variant;splice_donor_variant	3	97646311	G	A	4.64509e-05	1	172225	ADD	3.55341	1.02453	12.0294	3.28094	NA	CD
3:97646311:G:A	3	97646311	G	A	EPHA6	intron_variant;intron_variant&NMD_transcript_variant;splice_donor_variant	splice_donor_variant	high	intron_variant	highConf	NA	NA	NA	NA	NA	NA	NA	NA	intron_variant;intron_variant&NMD_transcript_variant;splice_donor_variant	3	97646311	G	A	4.64509e-05	1	172225	ADD	2.37162	0.914958	6.71872	2.02042	NA	UC
3:97647332:C:T	3	97647332	C	T	EPHA6	intron_variant;intron_variant&NMD_transcript_variant	intron_variant	modifier	intron_variant	NA	NA	NA	NA	NA	NA	NA	NA	NA	intron_variant;intron_variant&NMD_transcript_variant	3	97647332	C	T	1.45159e-05	1	172225	ADD	3.64618	1.32873	7.53012	2.21698	NA	UC
3:97647358:G:A	3	97647358	G	A	EPHA6	intron_variant;intron_variant&NMD_transcript_variant	intron_variant	modifier	intron_variant	NA	NA	NA	NA	NA	NA	NA	NA	NA	intron_variant;intron_variant&NMD_transcript_variant	3	97647358	G	A	8.70954e-06	1	172225	ADD	4.70772	1.48001	10.118	2.83318	NA	UC
3:97647448:T:G	3	97647448	T	G	EPHA6	intron_variant;intron_variant&NMD_transcript_variant	intron_variant	modifier	intron_variant	NA	NA	NA	NA	NA	NA	NA	NA	NA	intron_variant;intron_variant&NMD_transcript_variant	3	97647448	T	G	8.70954e-06	1	172225	ADD	3.81065	1.44039	6.99901	2.08855	NA	UC
3:97647524:G:C	3	97647524	G	C	EPHA6	intron_variant;intron_variant&NMD_transcript_variant	intron_variant	modifier	intron_variant	NA	NA	NA	NA	NA	NA	NA	NA	NA	intron_variant;intron_variant&NMD_transcript_variant	3	97647524	G	C	1.45159e-05	1	172225	ADD	3.68083	1.33331	7.62131	2.23896	NA	UC
3:97647587:T:C	3	97647587	T	C	EPHA6	intron_variant;intron_variant&NMD_transcript_variant	intron_variant	modifier	intron_variant	NA	NA	NA	NA	NA	NA	NA	NA	NA	intron_variant;intron_variant&NMD_transcript_variant	3	97647587	T	C	8.99985e-05	1	172225	ADD	2.66264	0.921363	8.35146	2.41411	NA	CD
3:97648194:T:C	3	97648194	T	C	EPHA6	intron_variant;intron_variant&NMD_transcript_variant	intron_variant	modifier	intron_variant	NA	NA	NA	NA	NA	NA	NA	NA	NA	intron_variant;intron_variant&NMD_transcript_variant	3	97648194	T	C	8.70954e-06	1	172225	ADD	4.91085	1.52444	10.3774	2.89427	NA	CD
3:97648194:T:C	3	97648194	T	C	EPHA6	intron_variant;intron_variant&NMD_transcript_variant	intron_variant	modifier	intron_variant	NA	NA	NA	NA	NA	NA	NA	NA	NA	intron_variant;intron_variant&NMD_transcript_variant	3	97648194	T	C	8.70954e-06	1	172225	ADD	4.18942	1.55361	7.27155	2.15456	NA	UC
3:97648443:T:A	3	97648443	T	A	EPHA6	intron_variant;intron_variant&NMD_transcript_variant;3_prime_UTR_variant	3_prime_UTR_variant	modifier	UTR_variant	NA	NA	NA	NA	NA	NA	NA	NA	NA	intron_variant;intron_variant&NMD_transcript_variant;3_prime_UTR_variant	3	97648443	T	A	1.74191e-05	1	172225	ADD	3.88973	1.35299	8.26516	2.39348	NA	CD
3:97648482:T:G	3	97648482	T	G	EPHA6	intron_variant;intron_variant&NMD_transcript_variant;3_prime_UTR_variant	3_prime_UTR_variant	modifier	UTR_variant	NA	NA	NA	NA	NA	NA	NA	NA	NA	intron_variant;intron_variant&NMD_transcript_variant;3_prime_UTR_variant	3	97648482	T	G	8.70954e-06	1	172225	ADD	4.88348	1.54669	9.96906	2.79808	NA	CD
3:97648534:T:C	3	97648534	T	C	EPHA6	intron_variant;intron_variant&NMD_transcript_variant;3_prime_UTR_variant	3_prime_UTR_variant	modifier	UTR_variant	NA	NA	NA	NA	NA	NA	NA	NA	NA	intron_variant;intron_variant&NMD_transcript_variant;3_prime_UTR_variant	3	97648534	T	C	1.45159e-05	1	172225	ADD	3.78957	1.34907	7.89061	2.30371	NA	UC
3:97649030:C:T	3	97649030	C	T	EPHA6	intron_variant;intron_variant&NMD_transcript_variant;downstream_gene_variant	intron_variant	modifier	intron_variant	NA	NA	NA	NA	NA	NA	NA	NA	NA	intron_variant;intron_variant&NMD_transcript_variant;downstream_gene_variant	3	97649030	C	T	1.45159e-05	1	172225	ADD	3.58988	1.33698	7.20964	2.13958	NA	UC
3:97650025:T:C	3	97650025	T	C	EPHA6	intron_variant;intron_variant&NMD_transcript_variant;downstream_gene_variant	intron_variant	modifier	intron_variant	NA	NA	NA	NA	NA	NA	NA	NA	NA	intron_variant;intron_variant&NMD_transcript_variant;downstream_gene_variant	3	97650025	T	C	1.16127e-05	1	172225	ADD	4.0688	1.38445	8.63728	2.48234	NA	CD
3:97650648:A:T	3	97650648	A	T	EPHA6	intron_variant;intron_variant&NMD_transcript_variant;downstream_gene_variant	intron_variant	modifier	intron_variant	NA	NA	NA	NA	NA	NA	NA	NA	NA	intron_variant;intron_variant&NMD_transcript_variant;downstream_gene_variant	3	97650648	A	T	8.70954e-06	1	172225	ADD	3.87962	1.38809	7.81166	2.28475	NA	CD
3:97655443:A:C	3	97655443	A	C	EPHA6	intron_variant;intron_variant&NMD_transcript_variant	intron_variant	modifier	intron_variant	NA	NA	NA	NA	NA	NA	NA	NA	NA	intron_variant;intron_variant&NMD_transcript_variant	3	97655443	A	C	2.90318e-05	1	172225	ADD	3.27996	1.2689	6.68161	2.01138	NA	CD
3:97656046:G:A	3	97656046	G	A	EPHA6	intron_variant;intron_variant&NMD_transcript_variant	intron_variant	modifier	intron_variant	NA	NA	NA	NA	NA	NA	NA	NA	NA	intron_variant;intron_variant&NMD_transcript_variant	3	97656046	G	A	0.000238061	1	172225	ADD	1.70232	0.615624	7.64634	2.24498	NA	UC
3:97656103:G:A	3	97656103	G	A	EPHA6	intron_variant;intron_variant&NMD_transcript_variant	intron_variant	modifier	intron_variant	NA	NA	NA	NA	NA	NA	NA	NA	NA	intron_variant;intron_variant&NMD_transcript_variant	3	97656103	G	A	8.70954e-06	1	172225	ADD	4.36703	1.47317	8.78748	2.51812	NA	UC
3:97656534:A:G	3	97656534	A	G	EPHA6	intron_variant;intron_variant&NMD_transcript_variant	intron_variant	modifier	intron_variant	NA	NA	NA	NA	NA	NA	NA	NA	NA	intron_variant;intron_variant&NMD_transcript_variant	3	97656534	A	G	2.03223e-05	1	172225	ADD	3.60291	1.06255	11.4977	3.15688	NA	UC
3:97656743:T:G	3	97656743	T	G	EPHA6	intron_variant;intron_variant&NMD_transcript_variant	intron_variant	modifier	intron_variant	NA	NA	NA	NA	NA	NA	NA	NA	NA	intron_variant;intron_variant&NMD_transcript_variant	3	97656743	T	G	8.70954e-06	1	172225	ADD	4.82126	1.49994	10.3317	2.88351	NA	CD
3:97656759:G:T	3	97656759	G	T	EPHA6	intron_variant;intron_variant&NMD_transcript_variant	intron_variant	modifier	intron_variant	NA	NA	NA	NA	NA	NA	NA	NA	NA	intron_variant;intron_variant&NMD_transcript_variant	3	97656759	G	T	2.90318e-05	1	172225	ADD	3.65399	1.31776	7.68886	2.25522	NA	CD
3:97657270:A:T	3	97657270	A	T	EPHA6	intron_variant;intron_variant&NMD_transcript_variant	intron_variant	modifier	intron_variant	NA	NA	NA	NA	NA	NA	NA	NA	NA	intron_variant;intron_variant&NMD_transcript_variant	3	97657270	A	T	1.45159e-05	1	172225	ADD	3.61996	1.36373	7.04615	2.09998	NA	UC
3:97657929:A:G	3	97657929	A	G	EPHA6	intron_variant;intron_variant&NMD_transcript_variant	intron_variant	modifier	intron_variant	NA	NA	NA	NA	NA	NA	NA	NA	NA	intron_variant;intron_variant&NMD_transcript_variant	3	97657929	A	G	1.16127e-05	1	172225	ADD	4.03496	1.37696	8.58686	2.47032	NA	UC
3:97658015:G:A	3	97658015	G	A	EPHA6	intron_variant;intron_variant&NMD_transcript_variant	intron_variant	modifier	intron_variant	NA	NA	NA	NA	NA	NA	NA	NA	NA	intron_variant;intron_variant&NMD_transcript_variant	3	97658015	G	A	2.32254e-05	1	172225	ADD	4.18589	1.094	14.64	3.88563	NA	CD
3:97658015:G:A	3	97658015	G	A	EPHA6	intron_variant;intron_variant&NMD_transcript_variant	intron_variant	modifier	intron_variant	NA	NA	NA	NA	NA	NA	NA	NA	NA	intron_variant;intron_variant&NMD_transcript_variant	3	97658015	G	A	2.32254e-05	1	172225	ADD	3.69499	1.06685	11.9956	3.27307	NA	UC
3:97658018:G:T	3	97658018	G	T	EPHA6	intron_variant;intron_variant&NMD_transcript_variant	intron_variant	modifier	intron_variant	NA	NA	NA	NA	NA	NA	NA	NA	NA	intron_variant;intron_variant&NMD_transcript_variant	3	97658018	G	T	2.61286e-05	1	172225	ADD	3.29474	1.27692	6.65755	2.00552	NA	CD
3:97658113:T:C	3	97658113	T	C	EPHA6	intron_variant;intron_variant&NMD_transcript_variant	intron_variant	modifier	intron_variant	NA	NA	NA	NA	NA	NA	NA	NA	NA	intron_variant;intron_variant&NMD_transcript_variant	3	97658113	T	C	1.16127e-05	1	172225	ADD	3.94374	1.38465	8.11217	2.35685	NA	CD
3:97658426:A:G	3	97658426	A	G	EPHA6	intron_variant;intron_variant&NMD_transcript_variant	intron_variant	modifier	intron_variant	NA	NA	NA	NA	NA	NA	NA	NA	NA	intron_variant;intron_variant&NMD_transcript_variant	3	97658426	A	G	4.64509e-05	1	172225	ADD	3.36146	1.27181	6.98569	2.08532	NA	CD
3:97658514:C:A	3	97658514	C	A	EPHA6	intron_variant;intron_variant&NMD_transcript_variant	intron_variant	modifier	intron_variant	NA	NA	NA	NA	NA	NA	NA	NA	NA	intron_variant;intron_variant&NMD_transcript_variant	3	97658514	C	A	8.70954e-06	1	172225	ADD	3.57379	1.34916	7.01672	2.09285	NA	UC
3:97658904:G:A	3	97658904	G	A	EPHA6	intron_variant;intron_variant&NMD_transcript_variant	intron_variant	modifier	intron_variant	NA	NA	NA	NA	NA	NA	NA	NA	NA	intron_variant;intron_variant&NMD_transcript_variant	3	97658904	G	A	8.70954e-06	1	172225	ADD	3.91648	1.38782	7.96392	2.32131	NA	UC
3:97658999:G:A	3	97658999	G	A	EPHA6	intron_variant;intron_variant&NMD_transcript_variant	intron_variant	modifier	intron_variant	NA	NA	NA	NA	NA	NA	NA	NA	NA	intron_variant;intron_variant&NMD_transcript_variant	3	97658999	G	A	8.70954e-06	1	172225	ADD	4.44599	1.44499	9.46691	2.67942	NA	CD
3:97659406:A:G	3	97659406	A	G	EPHA6	intron_variant;intron_variant&NMD_transcript_variant	intron_variant	modifier	intron_variant	NA	NA	NA	NA	NA	NA	NA	NA	NA	intron_variant;intron_variant&NMD_transcript_variant	3	97659406	A	G	2.32254e-05	1	172225	ADD	3.76918	1.3362	7.9571	2.31967	NA	CD
3:97659425:A:C	3	97659425	A	C	EPHA6	intron_variant;intron_variant&NMD_transcript_variant	intron_variant	modifier	intron_variant	NA	NA	NA	NA	NA	NA	NA	NA	NA	intron_variant;intron_variant&NMD_transcript_variant	3	97659425	A	C	1.45159e-05	1	172225	ADD	3.53071	1.3116	7.2464	2.14848	NA	UC
3:97660642:A:C	3	97660642	A	C	EPHA6	intron_variant;intron_variant&NMD_transcript_variant	intron_variant	modifier	intron_variant	NA	NA	NA	NA	NA	NA	NA	NA	NA	intron_variant;intron_variant&NMD_transcript_variant	3	97660642	A	C	7.83858e-05	1	172225	ADD	2.81043	0.936688	9.00233	2.56922	NA	CD
3:97660901:C:G	3	97660901	C	G	EPHA6	intron_variant;intron_variant&NMD_transcript_variant	intron_variant	modifier	intron_variant	NA	NA	NA	NA	NA	NA	NA	NA	NA	intron_variant;intron_variant&NMD_transcript_variant	3	97660901	C	G	8.70954e-06	1	172225	ADD	4.66915	1.75716	7.06084	2.10354	NA	CD
3:97661123:C:T	3	97661123	C	T	EPHA6	intron_variant;intron_variant&NMD_transcript_variant	intron_variant	modifier	intron_variant	NA	NA	NA	NA	NA	NA	NA	NA	NA	intron_variant;intron_variant&NMD_transcript_variant	3	97661123	C	T	8.70954e-06	1	172225	ADD	3.80824	1.40305	7.36722	2.17768	NA	UC
3:97662262:A:G	3	97662262	A	G	EPHA6	intron_variant;intron_variant&NMD_transcript_variant	intron_variant	modifier	intron_variant	NA	NA	NA	NA	NA	NA	NA	NA	NA	intron_variant;intron_variant&NMD_transcript_variant	3	97662262	A	G	2.90318e-05	1	172225	ADD	3.97769	1.34679	8.72293	2.50275	NA	CD
3:97663315:CT:C	3	97663315	CT	C	EPHA6	intron_variant;intron_variant&NMD_transcript_variant	intron_variant	modifier	intron_variant	NA	NA	NA	NA	NA	NA	NA	NA	NA	intron_variant;intron_variant&NMD_transcript_variant	3	97663315	CT	C	1.16127e-05	1	172225	ADD	3.96414	1.36866	8.38892	2.42307	NA	UC
3:97665571:G:C	3	97665571	G	C	EPHA6	intron_variant;intron_variant&NMD_transcript_variant	intron_variant	modifier	intron_variant	NA	NA	NA	NA	NA	NA	NA	NA	NA	intron_variant;intron_variant&NMD_transcript_variant	3	97665571	G	C	1.74191e-05	1	172225	ADD	3.53884	1.3326	7.0522	2.10145	NA	UC
3:97666172:T:C	3	97666172	T	C	EPHA6	intron_variant;intron_variant&NMD_transcript_variant	intron_variant	modifier	intron_variant	NA	NA	NA	NA	NA	NA	NA	NA	NA	intron_variant;intron_variant&NMD_transcript_variant	3	97666172	T	C	0.00012774	1	172225	ADD	2.30927	0.889118	6.74572	2.027	NA	CD
3:97666810:A:G	3	97666810	A	G	EPHA6	intron_variant;intron_variant&NMD_transcript_variant	intron_variant	modifier	intron_variant	NA	NA	NA	NA	NA	NA	NA	NA	NA	intron_variant;intron_variant&NMD_transcript_variant	3	97666810	A	G	0.000168384	1	172225	ADD	1.98556	0.618358	10.3106	2.87855	NA	CD
3:97667304:C:T	3	97667304	C	T	EPHA6	intron_variant;intron_variant&NMD_transcript_variant	intron_variant	modifier	intron_variant	NA	NA	NA	NA	NA	NA	NA	NA	NA	intron_variant;intron_variant&NMD_transcript_variant	3	97667304	C	T	0.000116127	1	172225	ADD	2.65813	0.689855	14.847	3.93332	NA	UC
3:97667773:C:A	3	97667773	C	A	EPHA6	intron_variant;intron_variant&NMD_transcript_variant	intron_variant	modifier	intron_variant	NA	NA	NA	NA	NA	NA	NA	NA	NA	intron_variant;intron_variant&NMD_transcript_variant	3	97667773	C	A	8.70954e-06	1	172225	ADD	3.54906	1.36468	6.76341	2.0313	NA	UC
3:97668051:T:C	3	97668051	T	C	EPHA6	intron_variant;intron_variant&NMD_transcript_variant	intron_variant	modifier	intron_variant	NA	NA	NA	NA	NA	NA	NA	NA	NA	intron_variant;intron_variant&NMD_transcript_variant	3	97668051	T	C	2.61286e-05	1	172225	ADD	3.32807	1.27933	6.76742	2.03228	NA	UC
3:97669284:C:A	3	97669284	C	A	EPHA6	intron_variant;intron_variant&NMD_transcript_variant	intron_variant	modifier	intron_variant	NA	NA	NA	NA	NA	NA	NA	NA	NA	intron_variant;intron_variant&NMD_transcript_variant	3	97669284	C	A	1.74191e-05	1	172225	ADD	3.90016	1.39451	7.82212	2.28726	NA	CD
3:97669916:G:T	3	97669916	G	T	EPHA6	intron_variant;intron_variant&NMD_transcript_variant	intron_variant	modifier	intron_variant	NA	NA	NA	NA	NA	NA	NA	NA	NA	intron_variant;intron_variant&NMD_transcript_variant	3	97669916	G	T	1.16127e-05	1	172225	ADD	4.19477	1.40787	8.87754	2.53955	NA	UC
3:97670315:C:T	3	97670315	C	T	EPHA6	intron_variant;intron_variant&NMD_transcript_variant	intron_variant	modifier	intron_variant	NA	NA	NA	NA	NA	NA	NA	NA	NA	intron_variant;intron_variant&NMD_transcript_variant	3	97670315	C	T	5.80636e-05	1	172225	ADD	2.47129	0.907494	7.41581	2.18941	NA	UC
3:97670399:G:A	3	97670399	G	A	EPHA6	intron_variant;intron_variant&NMD_transcript_variant	intron_variant	modifier	intron_variant	NA	NA	NA	NA	NA	NA	NA	NA	NA	intron_variant;intron_variant&NMD_transcript_variant	3	97670399	G	A	1.16127e-05	1	172225	ADD	3.83045	1.35815	7.95434	2.31901	NA	UC
3:97670411:C:T	3	97670411	C	T	EPHA6	intron_variant;intron_variant&NMD_transcript_variant	intron_variant	modifier	intron_variant	NA	NA	NA	NA	NA	NA	NA	NA	NA	intron_variant;intron_variant&NMD_transcript_variant	3	97670411	C	T	2.32254e-05	1	172225	ADD	3.4533	1.31414	6.90535	2.06581	NA	CD
3:97670706:G:A	3	97670706	G	A	EPHA6	intron_variant;intron_variant&NMD_transcript_variant	intron_variant	modifier	intron_variant	NA	NA	NA	NA	NA	NA	NA	NA	NA	intron_variant;intron_variant&NMD_transcript_variant	3	97670706	G	A	8.70954e-06	1	172225	ADD	4.58628	1.50914	9.23555	2.62459	NA	UC
3:97672745:G:A	3	97672745	G	A	EPHA6	intron_variant;intron_variant&NMD_transcript_variant	intron_variant	modifier	intron_variant	NA	NA	NA	NA	NA	NA	NA	NA	NA	intron_variant;intron_variant&NMD_transcript_variant	3	97672745	G	A	4.64509e-05	1	172225	ADD	2.83179	0.968296	8.55274	2.46218	NA	CD
3:97672746:C:T	3	97672746	C	T	EPHA6	intron_variant;intron_variant&NMD_transcript_variant	intron_variant	modifier	intron_variant	NA	NA	NA	NA	NA	NA	NA	NA	NA	intron_variant;intron_variant&NMD_transcript_variant	3	97672746	C	T	3.1935e-05	1	172225	ADD	3.43181	1.32445	6.71387	2.01924	NA	CD
3:97672844:A:G	3	97672844	A	G	EPHA6	intron_variant;intron_variant&NMD_transcript_variant	intron_variant	modifier	intron_variant	NA	NA	NA	NA	NA	NA	NA	NA	NA	intron_variant;intron_variant&NMD_transcript_variant	3	97672844	A	G	2.61286e-05	1	172225	ADD	2.74735	0.983196	7.80814	2.2839	NA	UC
3:97673111:G:T	3	97673111	G	T	EPHA6	intron_variant;intron_variant&NMD_transcript_variant	intron_variant	modifier	intron_variant	NA	NA	NA	NA	NA	NA	NA	NA	NA	intron_variant;intron_variant&NMD_transcript_variant	3	97673111	G	T	1.16127e-05	1	172225	ADD	3.64749	1.36926	7.09601	2.11207	NA	UC
3:97673169:C:T	3	97673169	C	T	EPHA6	intron_variant;intron_variant&NMD_transcript_variant	intron_variant	modifier	intron_variant	NA	NA	NA	NA	NA	NA	NA	NA	NA	intron_variant;intron_variant&NMD_transcript_variant	3	97673169	C	T	8.70954e-06	1	172225	ADD	4.63899	1.47218	9.92951	2.78875	NA	CD
3:97673865:C:T	3	97673865	C	T	EPHA6	intron_variant;intron_variant&NMD_transcript_variant	intron_variant	modifier	intron_variant	NA	NA	NA	NA	NA	NA	NA	NA	NA	intron_variant;intron_variant&NMD_transcript_variant	3	97673865	C	T	1.16127e-05	1	172225	ADD	4.88281	1.55994	9.79776	2.75765	NA	CD
3:97673993:G:C	3	97673993	G	C	EPHA6	intron_variant;intron_variant&NMD_transcript_variant	intron_variant	modifier	intron_variant	NA	NA	NA	NA	NA	NA	NA	NA	NA	intron_variant;intron_variant&NMD_transcript_variant	3	97673993	G	C	1.16127e-05	1	172225	ADD	5.79416	1.27455	20.6666	5.26232	NA	UC
3:97674699:A:G	3	97674699	A	G	EPHA6	intron_variant;intron_variant&NMD_transcript_variant	intron_variant	modifier	intron_variant	NA	NA	NA	NA	NA	NA	NA	NA	NA	intron_variant;intron_variant&NMD_transcript_variant	3	97674699	A	G	1.16127e-05	1	172225	ADD	3.94438	1.4283	7.6264	2.24018	NA	UC
3:97675773:T:C	3	97675773	T	C	EPHA6	intron_variant;intron_variant&NMD_transcript_variant	intron_variant	modifier	intron_variant	NA	NA	NA	NA	NA	NA	NA	NA	NA	intron_variant;intron_variant&NMD_transcript_variant	3	97675773	T	C	8.70954e-06	1	172225	ADD	5.39313	1.54189	12.2342	3.32862	NA	CD
3:97675773:T:C	3	97675773	T	C	EPHA6	intron_variant;intron_variant&NMD_transcript_variant	intron_variant	modifier	intron_variant	NA	NA	NA	NA	NA	NA	NA	NA	NA	intron_variant;intron_variant&NMD_transcript_variant	3	97675773	T	C	8.70954e-06	1	172225	ADD	3.71993	1.35888	7.49384	2.20824	NA	UC
3:97679685:G:A	3	97679685	G	A	EPHA6	intron_variant;intron_variant&NMD_transcript_variant	intron_variant	modifier	intron_variant	NA	NA	NA	NA	NA	NA	NA	NA	NA	intron_variant;intron_variant&NMD_transcript_variant	3	97679685	G	A	8.70954e-06	1	172225	ADD	4.62283	1.46933	9.89865	2.78146	NA	CD
3:97681025:C:T	3	97681025	C	T	EPHA6	intron_variant;intron_variant&NMD_transcript_variant	intron_variant	modifier	intron_variant	NA	NA	NA	NA	NA	NA	NA	NA	NA	intron_variant;intron_variant&NMD_transcript_variant	3	97681025	C	T	3.48381e-05	1	172225	ADD	2.9948	0.969348	9.545	2.6979	NA	UC
3:97682801:A:T	3	97682801	A	T	EPHA6	intron_variant;intron_variant&NMD_transcript_variant	intron_variant	modifier	intron_variant	NA	NA	NA	NA	NA	NA	NA	NA	NA	intron_variant;intron_variant&NMD_transcript_variant	3	97682801	A	T	1.45159e-05	1	172225	ADD	4.06474	1.38064	8.66779	2.48961	NA	UC
3:97683123:T:C	3	97683123	T	C	EPHA6	intron_variant;intron_variant&NMD_transcript_variant	intron_variant	modifier	intron_variant	NA	NA	NA	NA	NA	NA	NA	NA	NA	intron_variant;intron_variant&NMD_transcript_variant	3	97683123	T	C	1.16127e-05	1	172225	ADD	3.62592	1.34243	7.29549	2.16035	NA	UC
3:97685317:T:C	3	97685317	T	C	EPHA6	intron_variant;intron_variant&NMD_transcript_variant	intron_variant	modifier	intron_variant	NA	NA	NA	NA	NA	NA	NA	NA	NA	intron_variant;intron_variant&NMD_transcript_variant	3	97685317	T	C	0.000220642	1	172225	ADD	2.36636	0.667066	12.5842	3.41002	NA	CD
3:97686014:TATG:T	3	97686014	TATG	T	EPHA6	intron_variant;intron_variant&NMD_transcript_variant	intron_variant	modifier	intron_variant	NA	NA	NA	NA	NA	NA	NA	NA	NA	intron_variant;intron_variant&NMD_transcript_variant	3	97686014	TATG	T	0.000229351	1	172225	ADD	2.25423	0.658779	11.709	3.20621	NA	CD
3:97686943:A:G	3	97686943	A	G	EPHA6	intron_variant;intron_variant&NMD_transcript_variant	intron_variant	modifier	intron_variant	NA	NA	NA	NA	NA	NA	NA	NA	NA	intron_variant;intron_variant&NMD_transcript_variant	3	97686943	A	G	5.22572e-05	1	172225	ADD	2.65092	0.933859	8.05803	2.34388	NA	UC
3:97687080:C:T	3	97687080	C	T	EPHA6	intron_variant;intron_variant&NMD_transcript_variant	intron_variant	modifier	intron_variant	NA	NA	NA	NA	NA	NA	NA	NA	NA	intron_variant;intron_variant&NMD_transcript_variant	3	97687080	C	T	2.03223e-05	1	172225	ADD	3.37667	1.3091	6.65326	2.00448	NA	CD
3:97687163:A:G	3	97687163	A	G	EPHA6	intron_variant;intron_variant&NMD_transcript_variant	intron_variant	modifier	intron_variant	NA	NA	NA	NA	NA	NA	NA	NA	NA	intron_variant;intron_variant&NMD_transcript_variant	3	97687163	A	G	8.70954e-06	1	172225	ADD	3.78519	1.38853	7.43133	2.19316	NA	UC
3:97687300:G:A	3	97687300	G	A	EPHA6	intron_variant;intron_variant&NMD_transcript_variant	intron_variant	modifier	intron_variant	NA	NA	NA	NA	NA	NA	NA	NA	NA	intron_variant;intron_variant&NMD_transcript_variant	3	97687300	G	A	1.74191e-05	1	172225	ADD	3.98162	1.40098	8.07708	2.34844	NA	CD
3:97687577:T:C	3	97687577	T	C	EPHA6	intron_variant;intron_variant&NMD_transcript_variant	intron_variant	modifier	intron_variant	NA	NA	NA	NA	NA	NA	NA	NA	NA	intron_variant;intron_variant&NMD_transcript_variant	3	97687577	T	C	2.61286e-05	1	172225	ADD	3.93022	1.3471	8.51209	2.45248	NA	CD
3:97689457:C:T	3	97689457	C	T	EPHA6	intron_variant;intron_variant&NMD_transcript_variant	intron_variant	modifier	intron_variant	NA	NA	NA	NA	NA	NA	NA	NA	NA	intron_variant;intron_variant&NMD_transcript_variant	3	97689457	C	T	1.16127e-05	1	172225	ADD	4.80689	1.46455	10.7726	2.9871	NA	CD
3:97691751:A:T	3	97691751	A	T	EPHA6	intron_variant;intron_variant&NMD_transcript_variant	intron_variant	modifier	intron_variant	NA	NA	NA	NA	NA	NA	NA	NA	NA	intron_variant;intron_variant&NMD_transcript_variant	3	97691751	A	T	2.03223e-05	1	172225	ADD	4.42108	1.12096	15.5552	4.0962	NA	CD
3:97691751:A:T	3	97691751	A	T	EPHA6	intron_variant;intron_variant&NMD_transcript_variant	intron_variant	modifier	intron_variant	NA	NA	NA	NA	NA	NA	NA	NA	NA	intron_variant;intron_variant&NMD_transcript_variant	3	97691751	A	T	2.03223e-05	1	172225	ADD	3.51753	1.32591	7.03798	2.098	NA	UC
3:97692174:G:A	3	97692174	G	A	EPHA6	intron_variant;intron_variant&NMD_transcript_variant	intron_variant	modifier	intron_variant	NA	NA	NA	NA	NA	NA	NA	NA	NA	intron_variant;intron_variant&NMD_transcript_variant	3	97692174	G	A	1.45159e-05	1	172225	ADD	3.66424	1.35059	7.3607	2.1761	NA	UC
3:97692174:G:A	3	97692174	G	A	EPHA6	intron_variant;intron_variant&NMD_transcript_variant	intron_variant	modifier	intron_variant	NA	NA	NA	NA	NA	NA	NA	NA	NA	intron_variant;intron_variant&NMD_transcript_variant	3	97692174	G	A	1.45159e-05	1	172225	ADD	3.832	1.38654	7.63809	2.243	NA	CD
3:97693005:A:G	3	97693005	A	G	EPHA6	intron_variant;intron_variant&NMD_transcript_variant	intron_variant	modifier	intron_variant	NA	NA	NA	NA	NA	NA	NA	NA	NA	intron_variant;intron_variant&NMD_transcript_variant	3	97693005	A	G	1.16127e-05	1	172225	ADD	4.08277	1.58164	6.66338	2.00694	NA	CD
3:97693017:C:T	3	97693017	C	T	EPHA6	intron_variant;intron_variant&NMD_transcript_variant	intron_variant	modifier	intron_variant	NA	NA	NA	NA	NA	NA	NA	NA	NA	intron_variant;intron_variant&NMD_transcript_variant	3	97693017	C	T	1.16127e-05	1	172225	ADD	3.64236	1.3481	7.29999	2.16143	NA	UC
3:97693393:T:C	3	97693393	T	C	EPHA6	intron_variant;intron_variant&NMD_transcript_variant	intron_variant	modifier	intron_variant	NA	NA	NA	NA	NA	NA	NA	NA	NA	intron_variant;intron_variant&NMD_transcript_variant	3	97693393	T	C	8.70954e-06	1	172225	ADD	4.36033	1.46072	8.91052	2.5474	NA	UC
3:97695895:A:G	3	97695895	A	G	EPHA6	intron_variant;intron_variant&NMD_transcript_variant	intron_variant	modifier	intron_variant	NA	NA	NA	NA	NA	NA	NA	NA	NA	intron_variant;intron_variant&NMD_transcript_variant	3	97695895	A	G	1.45159e-05	1	172225	ADD	4.17844	1.49295	7.83318	2.28992	NA	CD
3:97697146:C:T	3	97697146	C	T	EPHA6	intron_variant;intron_variant&NMD_transcript_variant	intron_variant	modifier	intron_variant	NA	NA	NA	NA	NA	NA	NA	NA	NA	intron_variant;intron_variant&NMD_transcript_variant	3	97697146	C	T	8.70954e-06	1	172225	ADD	4.69409	1.46769	10.229	2.85935	NA	UC
3:97697994:T:C	3	97697994	T	C	EPHA6	intron_variant;intron_variant&NMD_transcript_variant	intron_variant	modifier	intron_variant	NA	NA	NA	NA	NA	NA	NA	NA	NA	intron_variant;intron_variant&NMD_transcript_variant	3	97697994	T	C	8.70954e-06	1	172225	ADD	3.88165	1.40678	7.61349	2.23707	NA	UC
3:97698566:G:C	3	97698566	G	C	EPHA6	intron_variant;intron_variant&NMD_transcript_variant	intron_variant	modifier	intron_variant	NA	NA	NA	NA	NA	NA	NA	NA	NA	intron_variant;intron_variant&NMD_transcript_variant	3	97698566	G	C	1.45159e-05	1	172225	ADD	4.14238	1.39386	8.83205	2.52873	NA	CD
3:97698590:A:G	3	97698590	A	G	EPHA6	intron_variant;intron_variant&NMD_transcript_variant	intron_variant	modifier	intron_variant	NA	NA	NA	NA	NA	NA	NA	NA	NA	intron_variant;intron_variant&NMD_transcript_variant	3	97698590	A	G	3.77413e-05	1	172225	ADD	3.48558	1.01217	11.8589	3.2412	NA	UC
3:97701082:G:A	3	97701082	G	A	EPHA6	intron_variant;intron_variant&NMD_transcript_variant	intron_variant	modifier	intron_variant	NA	NA	NA	NA	NA	NA	NA	NA	NA	intron_variant;intron_variant&NMD_transcript_variant	3	97701082	G	A	2.61286e-05	1	172225	ADD	3.46033	1.31829	6.88992	2.06207	NA	CD
3:97703540:A:G	3	97703540	A	G	EPHA6	intron_variant;intron_variant&NMD_transcript_variant	intron_variant	modifier	intron_variant	NA	NA	NA	NA	NA	NA	NA	NA	NA	intron_variant;intron_variant&NMD_transcript_variant	3	97703540	A	G	1.16127e-05	1	172225	ADD	3.90212	1.41506	7.60421	2.23484	NA	UC
3:97703805:G:A	3	97703805	G	A	EPHA6	intron_variant;intron_variant&NMD_transcript_variant	intron_variant	modifier	intron_variant	NA	NA	NA	NA	NA	NA	NA	NA	NA	intron_variant;intron_variant&NMD_transcript_variant	3	97703805	G	A	4.64509e-05	1	172225	ADD	2.71634	0.939482	8.35973	2.41609	NA	UC
3:97705871:T:C	3	97705871	T	C	EPHA6	intron_variant;intron_variant&NMD_transcript_variant	intron_variant	modifier	intron_variant	NA	NA	NA	NA	NA	NA	NA	NA	NA	intron_variant;intron_variant&NMD_transcript_variant	3	97705871	T	C	1.16127e-05	1	172225	ADD	3.87813	1.36208	8.10661	2.35552	NA	UC
3:97706072:A:C	3	97706072	A	C	EPHA6	intron_variant;intron_variant&NMD_transcript_variant	intron_variant	modifier	intron_variant	NA	NA	NA	NA	NA	NA	NA	NA	NA	intron_variant;intron_variant&NMD_transcript_variant	3	97706072	A	C	1.16127e-05	1	172225	ADD	3.94029	1.50361	6.86729	2.05657	NA	CD
3:97706072:A:C	3	97706072	A	C	EPHA6	intron_variant;intron_variant&NMD_transcript_variant	intron_variant	modifier	intron_variant	NA	NA	NA	NA	NA	NA	NA	NA	NA	intron_variant;intron_variant&NMD_transcript_variant	3	97706072	A	C	1.16127e-05	1	172225	ADD	3.51185	1.33922	6.87649	2.0588	NA	UC
3:97706429:C:T	3	97706429	C	T	EPHA6	intron_variant;intron_variant&NMD_transcript_variant	intron_variant	modifier	intron_variant	NA	NA	NA	NA	NA	NA	NA	NA	NA	intron_variant;intron_variant&NMD_transcript_variant	3	97706429	C	T	1.45159e-05	1	172225	ADD	4.14893	1.40856	8.67606	2.49158	NA	UC
3:97706600:C:T	3	97706600	C	T	EPHA6	intron_variant;intron_variant&NMD_transcript_variant	intron_variant	modifier	intron_variant	NA	NA	NA	NA	NA	NA	NA	NA	NA	intron_variant;intron_variant&NMD_transcript_variant	3	97706600	C	T	0.000238061	1	172225	ADD	1.94045	0.715425	7.35658	2.17511	NA	CD
3:97706656:T:C	3	97706656	T	C	EPHA6	intron_variant;intron_variant&NMD_transcript_variant	intron_variant	modifier	intron_variant	NA	NA	NA	NA	NA	NA	NA	NA	NA	intron_variant;intron_variant&NMD_transcript_variant	3	97706656	T	C	1.45159e-05	1	172225	ADD	3.91667	1.36981	8.17547	2.37201	NA	CD
3:97710016:A:G	3	97710016	A	G	EPHA6	intron_variant;intron_variant&NMD_transcript_variant	intron_variant	modifier	intron_variant	NA	NA	NA	NA	NA	NA	NA	NA	NA	intron_variant;intron_variant&NMD_transcript_variant	3	97710016	A	G	5.80636e-05	1	172225	ADD	3.59148	1.00794	12.6962	3.43604	NA	CD
3:97712227:T:C	3	97712227	T	C	EPHA6	intron_variant;intron_variant&NMD_transcript_variant	intron_variant	modifier	intron_variant	NA	NA	NA	NA	NA	NA	NA	NA	NA	intron_variant;intron_variant&NMD_transcript_variant	3	97712227	T	C	2.90318e-05	1	172225	ADD	3.46033	1.30201	7.0633	2.10414	NA	CD
3:97712368:C:G	3	97712368	C	G	EPHA6	intron_variant;intron_variant&NMD_transcript_variant	intron_variant	modifier	intron_variant	NA	NA	NA	NA	NA	NA	NA	NA	NA	intron_variant;intron_variant&NMD_transcript_variant	3	97712368	C	G	8.70954e-06	1	172225	ADD	3.8066	1.38553	7.54821	2.22134	NA	UC
3:97713018:A:G	3	97713018	A	G	EPHA6	intron_variant;intron_variant&NMD_transcript_variant	intron_variant	modifier	intron_variant	NA	NA	NA	NA	NA	NA	NA	NA	NA	intron_variant;intron_variant&NMD_transcript_variant	3	97713018	A	G	8.70954e-06	1	172225	ADD	5.03485	1.49728	11.3075	3.11242	NA	CD
3:97713055:T:C	3	97713055	T	C	EPHA6	intron_variant;intron_variant&NMD_transcript_variant	intron_variant	modifier	intron_variant	NA	NA	NA	NA	NA	NA	NA	NA	NA	intron_variant;intron_variant&NMD_transcript_variant	3	97713055	T	C	1.45159e-05	1	172225	ADD	4.08537	1.38494	8.70161	2.49767	NA	UC
3:97713295:A:G	3	97713295	A	G	EPHA6	intron_variant;intron_variant&NMD_transcript_variant	intron_variant	modifier	intron_variant	NA	NA	NA	NA	NA	NA	NA	NA	NA	intron_variant;intron_variant&NMD_transcript_variant	3	97713295	A	G	1.45159e-05	1	172225	ADD	4.2316	1.3963	9.18436	2.61245	NA	CD
3:97713295:A:G	3	97713295	A	G	EPHA6	intron_variant;intron_variant&NMD_transcript_variant	intron_variant	modifier	intron_variant	NA	NA	NA	NA	NA	NA	NA	NA	NA	intron_variant;intron_variant&NMD_transcript_variant	3	97713295	A	G	1.45159e-05	1	172225	ADD	3.73154	1.38223	7.28813	2.15857	NA	UC
3:97713693:T:G	3	97713693	T	G	EPHA6	intron_variant;intron_variant&NMD_transcript_variant	intron_variant	modifier	intron_variant	NA	NA	NA	NA	NA	NA	NA	NA	NA	intron_variant;intron_variant&NMD_transcript_variant	3	97713693	T	G	2.03223e-05	1	172225	ADD	3.36472	1.30039	6.69501	2.01465	NA	UC
3:97714506:A:C	3	97714506	A	C	EPHA6	intron_variant;intron_variant&NMD_transcript_variant	intron_variant	modifier	intron_variant	NA	NA	NA	NA	NA	NA	NA	NA	NA	intron_variant;intron_variant&NMD_transcript_variant	3	97714506	A	C	2.03223e-05	1	172225	ADD	3.43584	1.31975	6.77764	2.03477	NA	UC
3:97714609:C:T	3	97714609	C	T	EPHA6	intron_variant;intron_variant&NMD_transcript_variant	intron_variant	modifier	intron_variant	NA	NA	NA	NA	NA	NA	NA	NA	NA	intron_variant;intron_variant&NMD_transcript_variant	3	97714609	C	T	2.61286e-05	1	172225	ADD	2.80983	0.970601	8.38065	2.42109	NA	UC
3:97715497:G:A	3	97715497	G	A	EPHA6	intron_variant;intron_variant&NMD_transcript_variant	intron_variant	modifier	intron_variant	NA	NA	NA	NA	NA	NA	NA	NA	NA	intron_variant;intron_variant&NMD_transcript_variant	3	97715497	G	A	8.70954e-06	1	172225	ADD	5.40608	1.53887	12.3413	3.35355	NA	CD
3:97715532:A:G	3	97715532	A	G	EPHA6	intron_variant;intron_variant&NMD_transcript_variant	intron_variant	modifier	intron_variant	NA	NA	NA	NA	NA	NA	NA	NA	NA	intron_variant;intron_variant&NMD_transcript_variant	3	97715532	A	G	1.16127e-05	1	172225	ADD	4.25073	1.41294	9.0506	2.58069	NA	UC
3:97717986:C:T	3	97717986	C	T	EPHA6	intron_variant;intron_variant&NMD_transcript_variant	intron_variant	modifier	intron_variant	NA	NA	NA	NA	NA	NA	NA	NA	NA	intron_variant;intron_variant&NMD_transcript_variant	3	97717986	C	T	8.70954e-06	1	172225	ADD	4.67225	1.45742	10.2774	2.87073	NA	CD
3:97717986:C:T	3	97717986	C	T	EPHA6	intron_variant;intron_variant&NMD_transcript_variant	intron_variant	modifier	intron_variant	NA	NA	NA	NA	NA	NA	NA	NA	NA	intron_variant;intron_variant&NMD_transcript_variant	3	97717986	C	T	8.70954e-06	1	172225	ADD	4.76987	1.46756	10.5638	2.93809	NA	UC
3:97719819:AG:A	3	97719819	AG	A	EPHA6	intron_variant;intron_variant&NMD_transcript_variant	intron_variant	modifier	intron_variant	NA	NA	NA	NA	NA	NA	NA	NA	NA	intron_variant;intron_variant&NMD_transcript_variant	3	97719819	AG	A	0.000139353	1	172225	ADD	2.15863	0.73747	8.56775	2.46576	NA	UC
3:97719824:G:T	3	97719824	G	T	EPHA6	intron_variant;intron_variant&NMD_transcript_variant	intron_variant	modifier	intron_variant	NA	NA	NA	NA	NA	NA	NA	NA	NA	intron_variant;intron_variant&NMD_transcript_variant	3	97719824	G	T	0.000139353	1	172225	ADD	2.15863	0.73747	8.56775	2.46576	NA	UC
3:97720148:C:T	3	97720148	C	T	EPHA6	intron_variant;intron_variant&NMD_transcript_variant	intron_variant	modifier	intron_variant	NA	NA	NA	NA	NA	NA	NA	NA	NA	intron_variant;intron_variant&NMD_transcript_variant	3	97720148	C	T	8.70954e-06	1	172225	ADD	4.5652	1.44641	9.96174	2.79635	NA	UC
3:97720303:G:A	3	97720303	G	A	EPHA6	missense_variant;missense_variant&NMD_transcript_variant	missense_variant	moderate	coding_sequence_variant	NA	NA	NA	0.345;0.345	0.345	deleterious;tolerated_low_confidence	deleterious	possibly_damaging;benign	possibly_damaging	missense_variant;missense_variant&NMD_transcript_variant	3	97720303	G	A	2.03223e-05	1	172225	ADD	4.07657	1.36564	8.91085	2.54748	NA	CD
3:97723378:T:C	3	97723378	T	C	EPHA6	intron_variant;intron_variant&NMD_transcript_variant	intron_variant	modifier	intron_variant	NA	NA	NA	NA	NA	NA	NA	NA	NA	intron_variant;intron_variant&NMD_transcript_variant	3	97723378	T	C	8.70954e-06	1	172225	ADD	3.95257	1.48241	7.10921	2.11527	NA	CD
3:97723642:ACCAAAGAATATTCAAGCAAGAATCT:A	3	97723642	ACCAAAGAATATTCAAGCAAGAATCT	A	EPHA6	intron_variant;intron_variant&NMD_transcript_variant	intron_variant	modifier	intron_variant	NA	NA	NA	NA	NA	NA	NA	NA	NA	intron_variant;intron_variant&NMD_transcript_variant	3	97723642	ACCAAAGAATATTCAAGCAAGAATCT	A	1.16127e-05	1	172225	ADD	4.4049	1.45071	9.2196	2.62081	NA	CD
3:97723642:ACCAAAGAATATTCAAGCAAGAATCT:A	3	97723642	ACCAAAGAATATTCAAGCAAGAATCT	A	EPHA6	intron_variant;intron_variant&NMD_transcript_variant	intron_variant	modifier	intron_variant	NA	NA	NA	NA	NA	NA	NA	NA	NA	intron_variant;intron_variant&NMD_transcript_variant	3	97723642	ACCAAAGAATATTCAAGCAAGAATCT	A	1.16127e-05	1	172225	ADD	3.74911	1.37628	7.42061	2.19057	NA	UC
3:97726366:A:C	3	97726366	A	C	EPHA6	intron_variant;intron_variant&NMD_transcript_variant	intron_variant	modifier	intron_variant	NA	NA	NA	NA	NA	NA	NA	NA	NA	intron_variant;intron_variant&NMD_transcript_variant	3	97726366	A	C	1.45159e-05	1	172225	ADD	4.79124	1.50179	10.1783	2.8474	NA	CD
3:97727798:T:C	3	97727798	T	C	EPHA6	intron_variant;intron_variant&NMD_transcript_variant	intron_variant	modifier	intron_variant	NA	NA	NA	NA	NA	NA	NA	NA	NA	intron_variant;intron_variant&NMD_transcript_variant	3	97727798	T	C	3.48381e-05	1	172225	ADD	3.71239	1.03453	12.8772	3.47807	NA	UC
3:97728230:C:T	3	97728230	C	T	EPHA6	intron_variant;intron_variant&NMD_transcript_variant	intron_variant	modifier	intron_variant	NA	NA	NA	NA	NA	NA	NA	NA	NA	intron_variant;intron_variant&NMD_transcript_variant	3	97728230	C	T	1.45159e-05	1	172225	ADD	3.93533	1.36902	8.26315	2.393	NA	CD
3:97728421:C:T	3	97728421	C	T	EPHA6	intron_variant;intron_variant&NMD_transcript_variant	intron_variant	modifier	intron_variant	NA	NA	NA	NA	NA	NA	NA	NA	NA	intron_variant;intron_variant&NMD_transcript_variant	3	97728421	C	T	8.70954e-06	1	172225	ADD	4.72197	1.46375	10.4066	2.90113	NA	UC
3:97729649:T:C	3	97729649	T	C	EPHA6	intron_variant;intron_variant&NMD_transcript_variant	intron_variant	modifier	intron_variant	NA	NA	NA	NA	NA	NA	NA	NA	NA	intron_variant;intron_variant&NMD_transcript_variant	3	97729649	T	C	8.70954e-06	1	172225	ADD	4.62998	1.53871	9.05414	2.58153	NA	CD
3:97730090:C:A	3	97730090	C	A	EPHA6	intron_variant;intron_variant&NMD_transcript_variant	intron_variant	modifier	intron_variant	NA	NA	NA	NA	NA	NA	NA	NA	NA	intron_variant;intron_variant&NMD_transcript_variant	3	97730090	C	A	5.80636e-05	1	172225	ADD	2.46688	0.908263	7.37689	2.18001	NA	UC
3:97730110:C:T	3	97730110	C	T	EPHA6	intron_variant;intron_variant&NMD_transcript_variant	intron_variant	modifier	intron_variant	NA	NA	NA	NA	NA	NA	NA	NA	NA	intron_variant;intron_variant&NMD_transcript_variant	3	97730110	C	T	3.1935e-05	1	172225	ADD	3.34163	1.28955	6.71489	2.01949	NA	CD
3:97731555:A:C	3	97731555	A	C	EPHA6	intron_variant;intron_variant&NMD_transcript_variant	intron_variant	modifier	intron_variant	NA	NA	NA	NA	NA	NA	NA	NA	NA	intron_variant;intron_variant&NMD_transcript_variant	3	97731555	A	C	8.70954e-06	1	172225	ADD	4.5933	1.47457	9.70329	2.73533	NA	CD
3:97731555:A:C	3	97731555	A	C	EPHA6	intron_variant;intron_variant&NMD_transcript_variant	intron_variant	modifier	intron_variant	NA	NA	NA	NA	NA	NA	NA	NA	NA	intron_variant;intron_variant&NMD_transcript_variant	3	97731555	A	C	8.70954e-06	1	172225	ADD	4.48078	1.4484	9.57038	2.7039	NA	UC
3:97731819:G:A	3	97731819	G	A	EPHA6	intron_variant;intron_variant&NMD_transcript_variant	intron_variant	modifier	intron_variant	NA	NA	NA	NA	NA	NA	NA	NA	NA	intron_variant;intron_variant&NMD_transcript_variant	3	97731819	G	A	1.45159e-05	1	172225	ADD	3.74602	1.3359	7.86312	2.29711	NA	UC
3:97732020:C:T	3	97732020	C	T	EPHA6	intron_variant;intron_variant&NMD_transcript_variant	intron_variant	modifier	intron_variant	NA	NA	NA	NA	NA	NA	NA	NA	NA	intron_variant;intron_variant&NMD_transcript_variant	3	97732020	C	T	1.16127e-05	1	172225	ADD	3.7491	1.35603	7.64391	2.2444	NA	CD
3:97733558:T:C	3	97733558	T	C	EPHA6	intron_variant;intron_variant&NMD_transcript_variant	intron_variant	modifier	intron_variant	NA	NA	NA	NA	NA	NA	NA	NA	NA	intron_variant;intron_variant&NMD_transcript_variant	3	97733558	T	C	8.70954e-06	1	172225	ADD	3.77335	1.40819	7.18017	2.13245	NA	CD
3:97734736:G:A	3	97734736	G	A	EPHA6	intron_variant;intron_variant&NMD_transcript_variant	intron_variant	modifier	intron_variant	NA	NA	NA	NA	NA	NA	NA	NA	NA	intron_variant;intron_variant&NMD_transcript_variant	3	97734736	G	A	2.03223e-05	1	172225	ADD	3.65193	1.33844	7.44473	2.19639	NA	CD
3:97734778:C:T	3	97734778	C	T	EPHA6	intron_variant;intron_variant&NMD_transcript_variant	intron_variant	modifier	intron_variant	NA	NA	NA	NA	NA	NA	NA	NA	NA	intron_variant;intron_variant&NMD_transcript_variant	3	97734778	C	T	3.48381e-05	1	172225	ADD	3.29173	1.26746	6.74497	2.02681	NA	CD
3:97735311:A:C	3	97735311	A	C	EPHA6	intron_variant;intron_variant&NMD_transcript_variant	intron_variant	modifier	intron_variant	NA	NA	NA	NA	NA	NA	NA	NA	NA	intron_variant;intron_variant&NMD_transcript_variant	3	97735311	A	C	1.74191e-05	1	172225	ADD	2.17161	0.798661	7.39333	2.18398	NA	CD
3:97736331:T:C	3	97736331	T	C	EPHA6	intron_variant;intron_variant&NMD_transcript_variant	intron_variant	modifier	intron_variant	NA	NA	NA	NA	NA	NA	NA	NA	NA	intron_variant;intron_variant&NMD_transcript_variant	3	97736331	T	C	1.16127e-05	1	172225	ADD	4.27611	1.41346	9.1523	2.60484	NA	UC
3:97739525:T:G	3	97739525	T	G	EPHA6	intron_variant;intron_variant&NMD_transcript_variant	intron_variant	modifier	intron_variant	NA	NA	NA	NA	NA	NA	NA	NA	NA	intron_variant;intron_variant&NMD_transcript_variant	3	97739525	T	G	8.70954e-06	1	172225	ADD	4.82715	1.50001	10.356	2.88922	NA	UC
3:97740479:C:T	3	97740479	C	T	EPHA6	intron_variant;intron_variant&NMD_transcript_variant	intron_variant	modifier	intron_variant	NA	NA	NA	NA	NA	NA	NA	NA	NA	intron_variant;intron_variant&NMD_transcript_variant	3	97740479	C	T	1.45159e-05	1	172225	ADD	3.48757	1.32146	6.96522	2.08035	NA	UC
3:97740516:A:C	3	97740516	A	C	EPHA6	intron_variant;intron_variant&NMD_transcript_variant	intron_variant	modifier	intron_variant	NA	NA	NA	NA	NA	NA	NA	NA	NA	intron_variant;intron_variant&NMD_transcript_variant	3	97740516	A	C	1.45159e-05	1	172225	ADD	3.832	1.38654	7.63809	2.243	NA	CD
3:97740516:A:C	3	97740516	A	C	EPHA6	intron_variant;intron_variant&NMD_transcript_variant	intron_variant	modifier	intron_variant	NA	NA	NA	NA	NA	NA	NA	NA	NA	intron_variant;intron_variant&NMD_transcript_variant	3	97740516	A	C	1.45159e-05	1	172225	ADD	3.66424	1.35059	7.3607	2.1761	NA	UC
3:97740579:A:G	3	97740579	A	G	EPHA6	intron_variant;intron_variant&NMD_transcript_variant	intron_variant	modifier	intron_variant	NA	NA	NA	NA	NA	NA	NA	NA	NA	intron_variant;intron_variant&NMD_transcript_variant	3	97740579	A	G	1.74191e-05	1	172225	ADD	4.03852	1.36899	8.70245	2.49787	NA	CD
3:97741056:A:T	3	97741056	A	T	EPHA6	intron_variant;intron_variant&NMD_transcript_variant	intron_variant	modifier	intron_variant	NA	NA	NA	NA	NA	NA	NA	NA	NA	intron_variant;intron_variant&NMD_transcript_variant	3	97741056	A	T	0.000423864	1	172225	ADD	1.60933	0.445815	13.0311	3.51377	NA	UC
3:97742725:T:A	3	97742725	T	A	EPHA6	intron_variant;intron_variant&NMD_transcript_variant;upstream_gene_variant	intron_variant	modifier	intron_variant	NA	NA	NA	NA	NA	NA	NA	NA	NA	intron_variant;intron_variant&NMD_transcript_variant;upstream_gene_variant	3	97742725	T	A	2.03223e-05	1	172225	ADD	3.96448	1.36121	8.48254	2.44542	NA	CD
3:97743174:A:G	3	97743174	A	G	EPHA6	intron_variant;intron_variant&NMD_transcript_variant;upstream_gene_variant	intron_variant	modifier	intron_variant	NA	NA	NA	NA	NA	NA	NA	NA	NA	intron_variant;intron_variant&NMD_transcript_variant;upstream_gene_variant	3	97743174	A	G	3.1935e-05	1	172225	ADD	3.43181	1.32445	6.71387	2.01924	NA	CD
3:97743560:T:C	3	97743560	T	C	EPHA6	intron_variant;intron_variant&NMD_transcript_variant;upstream_gene_variant	intron_variant	modifier	intron_variant	NA	NA	NA	NA	NA	NA	NA	NA	NA	intron_variant;intron_variant&NMD_transcript_variant;upstream_gene_variant	3	97743560	T	C	2.03223e-05	1	172225	ADD	3.68387	1.35689	7.3709	2.17857	NA	CD
3:97743925:C:T	3	97743925	C	T	EPHA6	intron_variant;intron_variant&NMD_transcript_variant;upstream_gene_variant	intron_variant	modifier	intron_variant	NA	NA	NA	NA	NA	NA	NA	NA	NA	intron_variant;intron_variant&NMD_transcript_variant;upstream_gene_variant	3	97743925	C	T	9.58049e-05	1	172225	ADD	2.25066	0.751932	8.95904	2.55893	NA	UC
3:97744117:A:T	3	97744117	A	T	EPHA6	intron_variant;intron_variant&NMD_transcript_variant;upstream_gene_variant	intron_variant	modifier	intron_variant	NA	NA	NA	NA	NA	NA	NA	NA	NA	intron_variant;intron_variant&NMD_transcript_variant;upstream_gene_variant	3	97744117	A	T	1.45159e-05	1	172225	ADD	4.09653	1.22818	11.1252	3.06975	NA	CD
3:97744242:C:T	3	97744242	C	T	EPHA6	intron_variant;intron_variant&NMD_transcript_variant;upstream_gene_variant	intron_variant	modifier	intron_variant	NA	NA	NA	NA	NA	NA	NA	NA	NA	intron_variant;intron_variant&NMD_transcript_variant;upstream_gene_variant	3	97744242	C	T	5.22572e-05	1	172225	ADD	2.65581	0.93432	8.07984	2.34911	NA	UC
3:97744648:G:A	3	97744648	G	A	EPHA6	intron_variant;intron_variant&NMD_transcript_variant;upstream_gene_variant	intron_variant	modifier	intron_variant	NA	NA	NA	NA	NA	NA	NA	NA	NA	intron_variant;intron_variant&NMD_transcript_variant;upstream_gene_variant	3	97744648	G	A	8.70954e-06	1	172225	ADD	3.43369	1.33277	6.63758	2.00065	NA	UC
3:97744956:T:C	3	97744956	T	C	EPHA6	intron_variant;intron_variant&NMD_transcript_variant;upstream_gene_variant	intron_variant	modifier	intron_variant	NA	NA	NA	NA	NA	NA	NA	NA	NA	intron_variant;intron_variant&NMD_transcript_variant;upstream_gene_variant	3	97744956	T	C	4.9354e-05	1	172225	ADD	3.42589	1.27721	7.19486	2.13601	NA	CD
3:97745242:T:C	3	97745242	T	C	EPHA6	intron_variant;intron_variant&NMD_transcript_variant;upstream_gene_variant	intron_variant	modifier	intron_variant	NA	NA	NA	NA	NA	NA	NA	NA	NA	intron_variant;intron_variant&NMD_transcript_variant;upstream_gene_variant	3	97745242	T	C	0.000238061	1	172225	ADD	1.85438	0.707981	6.86049	2.05491	NA	CD
3:97745269:C:A	3	97745269	C	A	EPHA6	intron_variant;intron_variant&NMD_transcript_variant;upstream_gene_variant	intron_variant	modifier	intron_variant	NA	NA	NA	NA	NA	NA	NA	NA	NA	intron_variant;intron_variant&NMD_transcript_variant;upstream_gene_variant	3	97745269	C	A	1.45159e-05	1	172225	ADD	3.78265	1.35973	7.73902	2.26728	NA	UC
3:97745407:A:G	3	97745407	A	G	EPHA6	intron_variant;3_prime_UTR_variant&NMD_transcript_variant;upstream_gene_variant	3_prime_UTR_variant	modifier	UTR_variant	NA	NA	NA	NA	NA	NA	NA	NA	NA	intron_variant;3_prime_UTR_variant&NMD_transcript_variant;upstream_gene_variant	3	97745407	A	G	3.48381e-05	1	172225	ADD	3.13333	0.983634	10.1471	2.84006	NA	UC
3:97745513:A:G	3	97745513	A	G	EPHA6	intron_variant;3_prime_UTR_variant&NMD_transcript_variant;upstream_gene_variant	3_prime_UTR_variant	modifier	UTR_variant	NA	NA	NA	NA	NA	NA	NA	NA	NA	intron_variant;3_prime_UTR_variant&NMD_transcript_variant;upstream_gene_variant	3	97745513	A	G	1.16127e-05	1	172225	ADD	4.13108	1.39735	8.74005	2.50683	NA	UC
3:97746179:A:G	3	97746179	A	G	EPHA6	intron_variant;intron_variant&NMD_transcript_variant;upstream_gene_variant	intron_variant	modifier	intron_variant	NA	NA	NA	NA	NA	NA	NA	NA	NA	intron_variant;intron_variant&NMD_transcript_variant;upstream_gene_variant	3	97746179	A	G	1.74191e-05	1	172225	ADD	4.03852	1.36899	8.70245	2.49787	NA	CD
3:97747502:G:C	3	97747502	G	C	EPHA6	missense_variant;3_prime_UTR_variant&NMD_transcript_variant;upstream_gene_variant	missense_variant	moderate	coding_sequence_variant	NA	NA	NA	0.356;NA;NA	0.356	deleterious;NA;NA	deleterious	probably_damaging;NA;NA	probably_damaging	missense_variant;3_prime_UTR_variant&NMD_transcript_variant;upstream_gene_variant	3	97747502	G	C	3.48381e-05	1	172225	ADD	3.41376	1.03104	10.9628	3.0317	NA	CD
3:97747569:T:C	3	97747569	T	C	EPHA6	missense_variant;downstream_gene_variant;missense_variant&NMD_transcript_variant	missense_variant	moderate	coding_sequence_variant	NA	NA	NA	0.170;NA;0.170	0.17	tolerated;NA;tolerated	tolerated	benign;NA;benign	benign	missense_variant;downstream_gene_variant;missense_variant&NMD_transcript_variant	3	97747569	T	C	8.70954e-06	1	172225	ADD	3.95798	1.4651	7.29819	2.161	NA	CD
3:97747608:T:A	3	97747608	T	A	EPHA6	intron_variant;downstream_gene_variant;intron_variant&NMD_transcript_variant	intron_variant	modifier	intron_variant	NA	NA	NA	NA	NA	NA	NA	NA	NA	intron_variant;downstream_gene_variant;intron_variant&NMD_transcript_variant	3	97747608	T	A	2.32254e-05	1	172225	ADD	3.58348	1.31499	7.42617	2.19191	NA	CD
3:97748426:T:C	3	97748426	T	C	EPHA6	intron_variant;downstream_gene_variant;intron_variant&NMD_transcript_variant	intron_variant	modifier	intron_variant	NA	NA	NA	NA	NA	NA	NA	NA	NA	intron_variant;downstream_gene_variant;intron_variant&NMD_transcript_variant	3	97748426	T	C	8.70954e-06	1	172225	ADD	4.36033	1.46072	8.91052	2.5474	NA	UC
3:97749336:C:A	3	97749336	C	A	EPHA6	3_prime_UTR_variant;downstream_gene_variant;intron_variant&NMD_transcript_variant	3_prime_UTR_variant	modifier	UTR_variant	NA	NA	NA	NA	NA	NA	NA	NA	NA	3_prime_UTR_variant;downstream_gene_variant;intron_variant&NMD_transcript_variant	3	97749336	C	A	8.70954e-06	1	172225	ADD	3.78293	1.39589	7.34433	2.17215	NA	UC
3:97750068:AT:A	3	97750068	AT	A	EPHA6	3_prime_UTR_variant;downstream_gene_variant;intron_variant&NMD_transcript_variant	3_prime_UTR_variant	modifier	UTR_variant	NA	NA	NA	NA	NA	NA	NA	NA	NA	3_prime_UTR_variant;downstream_gene_variant;intron_variant&NMD_transcript_variant	3	97750068	AT	A	1.16127e-05	1	172225	ADD	3.51281	1.32919	6.98444	2.08502	NA	CD
3:97750068:AT:A	3	97750068	AT	A	EPHA6	3_prime_UTR_variant;downstream_gene_variant;intron_variant&NMD_transcript_variant	3_prime_UTR_variant	modifier	UTR_variant	NA	NA	NA	NA	NA	NA	NA	NA	NA	3_prime_UTR_variant;downstream_gene_variant;intron_variant&NMD_transcript_variant	3	97750068	AT	A	1.16127e-05	1	172225	ADD	3.69797	1.36986	7.28741	2.15839	NA	UC
3:97750256:T:C	3	97750256	T	C	EPHA6	3_prime_UTR_variant;downstream_gene_variant;intron_variant&NMD_transcript_variant	3_prime_UTR_variant	modifier	UTR_variant	NA	NA	NA	NA	NA	NA	NA	NA	NA	3_prime_UTR_variant;downstream_gene_variant;intron_variant&NMD_transcript_variant	3	97750256	T	C	1.16127e-05	1	172225	ADD	3.63972	1.36135	7.14819	2.12471	NA	UC
3:97750749:A:G	3	97750749	A	G	EPHA6	3_prime_UTR_variant;downstream_gene_variant;intron_variant&NMD_transcript_variant	3_prime_UTR_variant	modifier	UTR_variant	NA	NA	NA	NA	NA	NA	NA	NA	NA	3_prime_UTR_variant;downstream_gene_variant;intron_variant&NMD_transcript_variant	3	97750749	A	G	6.09668e-05	1	172225	ADD	3.22553	1.25197	6.63766	2.00067	NA	CD
3:97751739:A:C	3	97751739	A	C	EPHA6	3_prime_UTR_variant;downstream_gene_variant;intron_variant&NMD_transcript_variant	3_prime_UTR_variant	modifier	UTR_variant	NA	NA	NA	NA	NA	NA	NA	NA	NA	3_prime_UTR_variant;downstream_gene_variant;intron_variant&NMD_transcript_variant	3	97751739	A	C	8.70954e-06	1	172225	ADD	4.36475	1.44031	9.18349	2.61224	NA	UC
3:97753223:C:T	3	97753223	C	T	EPHA6	3_prime_UTR_variant;downstream_gene_variant	3_prime_UTR_variant	modifier	UTR_variant	NA	NA	NA	NA	NA	NA	NA	NA	NA	3_prime_UTR_variant;downstream_gene_variant	3	97753223	C	T	2.90318e-05	1	172225	ADD	3.85489	1.11571	11.9377	3.25957	NA	CD
3:97753232:G:A	3	97753232	G	A	EPHA6	3_prime_UTR_variant;downstream_gene_variant	3_prime_UTR_variant	modifier	UTR_variant	NA	NA	NA	NA	NA	NA	NA	NA	NA	3_prime_UTR_variant;downstream_gene_variant	3	97753232	G	A	1.45159e-05	1	172225	ADD	3.92256	1.41795	7.6527	2.24651	NA	CD
3:97755213:A:C	3	97755213	A	C	EPHA6	3_prime_UTR_variant;downstream_gene_variant	3_prime_UTR_variant	modifier	UTR_variant	NA	NA	NA	NA	NA	NA	NA	NA	NA	3_prime_UTR_variant;downstream_gene_variant	3	97755213	A	C	0.000235157	1	172225	ADD	1.85792	0.708339	6.8797	2.05958	NA	CD
3:97757740:GATATA:G	3	97757740	GATATA	G	EPHA6	3_prime_UTR_variant	3_prime_UTR_variant	modifier	UTR_variant	NA	NA	NA	NA	NA	NA	NA	NA	NA	3_prime_UTR_variant	3	97757740	GATATA	G	1.16127e-05	1	172225	ADD	3.98144	1.38077	8.31453	2.40528	NA	CD
3:97760593:A:T	3	97760593	A	T	EPHA6	3_prime_UTR_variant	3_prime_UTR_variant	modifier	UTR_variant	NA	NA	NA	NA	NA	NA	NA	NA	NA	3_prime_UTR_variant	3	97760593	A	T	8.70954e-06	1	172225	ADD	3.8066	1.38553	7.54821	2.22134	NA	UC
3:97761144:T:C	3	97761144	T	C	EPHA6	3_prime_UTR_variant	3_prime_UTR_variant	modifier	UTR_variant	NA	NA	NA	NA	NA	NA	NA	NA	NA	3_prime_UTR_variant	3	97761144	T	C	8.70954e-06	1	172225	ADD	4.82376	1.5	10.3416	2.88584	NA	UC
3:97761256:A:C	3	97761256	A	C	EPHA6	3_prime_UTR_variant	3_prime_UTR_variant	modifier	UTR_variant	NA	NA	NA	NA	NA	NA	NA	NA	NA	3_prime_UTR_variant	3	97761256	A	C	8.70954e-06	1	172225	ADD	4.5892	1.48542	9.54502	2.6979	NA	CD
3:97761597:A:C	3	97761597	A	C	EPHA6	downstream_gene_variant	downstream_gene_variant	modifier	intergenic_variant	NA	NA	NA	NA	NA	NA	NA	NA	NA	downstream_gene_variant	3	97761597	A	C	5.22572e-05	1	172225	ADD	2.46823	0.934649	6.97385	2.08244	NA	UC
3:97762127:G:A	3	97762127	G	A	EPHA6	downstream_gene_variant	downstream_gene_variant	modifier	intergenic_variant	NA	NA	NA	NA	NA	NA	NA	NA	NA	downstream_gene_variant	3	97762127	G	A	4.64509e-05	1	172225	ADD	2.80406	0.950243	8.70775	2.49913	NA	UC
3:97762803:A:T	3	97762803	A	T	EPHA6	downstream_gene_variant	downstream_gene_variant	modifier	intergenic_variant	NA	NA	NA	NA	NA	NA	NA	NA	NA	downstream_gene_variant	3	97762803	A	T	1.16127e-05	1	172225	ADD	4.32804	1.45076	8.90004	2.54491	NA	CD
3:97763040:G:A	3	97763040	G	A	EPHA6	downstream_gene_variant	downstream_gene_variant	modifier	intergenic_variant	NA	NA	NA	NA	NA	NA	NA	NA	NA	downstream_gene_variant	3	97763040	G	A	1.16127e-05	1	172225	ADD	3.69797	1.36986	7.28741	2.15839	NA	UC
3:97763040:G:A	3	97763040	G	A	EPHA6	downstream_gene_variant	downstream_gene_variant	modifier	intergenic_variant	NA	NA	NA	NA	NA	NA	NA	NA	NA	downstream_gene_variant	3	97763040	G	A	1.16127e-05	1	172225	ADD	3.51281	1.32919	6.98444	2.08502	NA	CD
3:97763141:C:T	3	97763141	C	T	EPHA6	downstream_gene_variant	downstream_gene_variant	modifier	intergenic_variant	NA	NA	NA	NA	NA	NA	NA	NA	NA	downstream_gene_variant	3	97763141	C	T	3.48381e-05	1	172225	ADD	3.29294	0.99561	10.9393	3.0262	NA	UC
3:97763195:T:G	3	97763195	T	G	EPHA6	downstream_gene_variant	downstream_gene_variant	modifier	intergenic_variant	NA	NA	NA	NA	NA	NA	NA	NA	NA	downstream_gene_variant	3	97763195	T	G	2.32254e-05	1	172225	ADD	4.00758	1.36731	8.59077	2.47125	NA	CD
3:97765211:G:GGGGGGT	3	97765211	G	GGGGGGT	EPHA6	downstream_gene_variant	downstream_gene_variant	modifier	intergenic_variant	NA	NA	NA	NA	NA	NA	NA	NA	NA	downstream_gene_variant	3	97765211	G	GGGGGGT	1.74191e-05	1	172225	ADD	4.00857	1.39012	8.31522	2.40545	NA	CD
