# Supplementary material for: Genetic and dietary modulators of the inflammatory response in the gastrointestinal tract of the BXD mouse genetic reference population
Source: eLife. 2023 Oct 19;12:RP87569. doi: 10.7554/eLife.87569 (PMC10586803; doi:10.7554/eLife.87569)
Supplement: Supplementary file 4. — Related to Figure 5 and its Figure 5—figure supplement 1. [file elife-87569-supp4.xlsx]

## Sheet: UKBB_candidate_gene_singleV_WGS
ID	CHROM.x	POS	REF	ALT	SYMBOL	consequence_all	consequence_mostSevere	consequence_mostSevere_impact	consequence_mostSevere_var_category	LoF_bestPrediction	five_prime_UTR_cons_all	five_prime_UTR_cons_mostSevere	REVEL_all	REVEL_max	SIFT_prediction_all	SIFT_prediction_mostSevere	PolyPhen_prediction_all	PolyPhen_prediction_mostSevere	var_consequence	CHROM.y	GENPOS	ALLELE0	ALLELE1	A1FREQ	INFO	N	TEST	BETA	SE	CHISQ	LOG10P	EXTRA	trait
3:195745486:TTATA:T	3	195745486	TTATA	T	MUC4	downstream_gene_variant	downstream_gene_variant	modifier	intergenic_variant	NA	NA	NA	NA	NA	NA	NA	NA	NA	downstream_gene_variant	3	195745486	TTATA	T	2.90318e-05	1	172225	ADD	3.59355	1.3091	7.53535	2.21824	NA	CD
3:195745830:G:A	3	195745830	G	A	MUC4	downstream_gene_variant	downstream_gene_variant	modifier	intergenic_variant	NA	NA	NA	NA	NA	NA	NA	NA	NA	downstream_gene_variant	3	195745830	G	A	2.03223e-05	1	172225	ADD	3.65439	1.336	7.48204	2.20539	NA	CD
3:195748133:G:A	3	195748133	G	A	MUC4	intron_variant&NMD_transcript_variant;intron_variant;intron_variant&non_coding_transcript_variant;downstream_gene_variant	intron_variant	modifier	intron_variant	NA	NA	NA	NA	NA	NA	NA	NA	NA	intron_variant&NMD_transcript_variant;intron_variant;intron_variant&non_coding_transcript_variant;downstream_gene_variant	3	195748133	G	A	1.16127e-05	1	172225	ADD	3.51049	1.34397	6.82275	2.04574	NA	CD
3:195748222:T:G	3	195748222	T	G	MUC4	intron_variant&NMD_transcript_variant;intron_variant;intron_variant&non_coding_transcript_variant;downstream_gene_variant	intron_variant	modifier	intron_variant	NA	NA	NA	NA	NA	NA	NA	NA	NA	intron_variant&NMD_transcript_variant;intron_variant;intron_variant&non_coding_transcript_variant;downstream_gene_variant	3	195748222	T	G	1.45159e-05	1	172225	ADD	4.33675	1.41437	9.40168	2.66397	NA	CD
3:195749736:A:G	3	195749736	A	G	MUC4	intron_variant&NMD_transcript_variant;intron_variant;intron_variant&non_coding_transcript_variant;downstream_gene_variant	intron_variant	modifier	intron_variant	NA	NA	NA	NA	NA	NA	NA	NA	NA	intron_variant&NMD_transcript_variant;intron_variant;intron_variant&non_coding_transcript_variant;downstream_gene_variant	3	195749736	A	G	1.45159e-05	1	172225	ADD	5.07787	1.48466	11.6979	3.20364	NA	CD
3:195749980:G:A	3	195749980	G	A	MUC4	intron_variant&NMD_transcript_variant;intron_variant;intron_variant&non_coding_transcript_variant;non_coding_transcript_exon_variant;downstream_gene_variant	non_coding_transcript_exon_variant	modifier	non_coding_transcript_variant	NA	NA	NA	NA	NA	NA	NA	NA	NA	intron_variant&NMD_transcript_variant;intron_variant;intron_variant&non_coding_transcript_variant;non_coding_transcript_exon_variant;downstream_gene_variant	3	195749980	G	A	8.70954e-06	1	172225	ADD	4.23527	1.48447	8.13986	2.36349	NA	UC
3:195749984:C:T	3	195749984	C	T	MUC4	intron_variant&NMD_transcript_variant;intron_variant;intron_variant&non_coding_transcript_variant;non_coding_transcript_exon_variant;downstream_gene_variant	non_coding_transcript_exon_variant	modifier	non_coding_transcript_variant	NA	NA	NA	NA	NA	NA	NA	NA	NA	intron_variant&NMD_transcript_variant;intron_variant;intron_variant&non_coding_transcript_variant;non_coding_transcript_exon_variant;downstream_gene_variant	3	195749984	C	T	3.1935e-05	1	172225	ADD	3.39156	1.29739	6.83372	2.04841	NA	CD
3:195750335:G:A	3	195750335	G	A	MUC4	intron_variant&NMD_transcript_variant;intron_variant;intron_variant&non_coding_transcript_variant;non_coding_transcript_exon_variant;downstream_gene_variant	non_coding_transcript_exon_variant	modifier	non_coding_transcript_variant	NA	NA	NA	NA	NA	NA	NA	NA	NA	intron_variant&NMD_transcript_variant;intron_variant;intron_variant&non_coding_transcript_variant;non_coding_transcript_exon_variant;downstream_gene_variant	3	195750335	G	A	2.90318e-05	1	172225	ADD	3.62687	1.32324	7.5125	2.21274	NA	CD
3:195750997:C:T	3	195750997	C	T	MUC4	3_prime_UTR_variant&NMD_transcript_variant;missense_variant;missense_variant;missense_variant;non_coding_transcript_exon_variant	missense_variant	moderate	coding_sequence_variant	NA	NA	NA	NA;0.199;0.199;0.199;NA	0.199	NA;deleterious;deleterious;deleterious_low_confidence;NA	deleterious	NA;possibly_damaging;benign;probably_damaging;NA	probably_damaging	3_prime_UTR_variant&NMD_transcript_variant;missense_variant;missense_variant;missense_variant;non_coding_transcript_exon_variant	3	195750997	C	T	2.32254e-05	1	172225	ADD	3.32119	1.27825	6.75086	2.02825	NA	UC
3:195751049:C:T	3	195751049	C	T	MUC4	3_prime_UTR_variant&NMD_transcript_variant;synonymous_variant;non_coding_transcript_exon_variant	synonymous_variant	low	coding_sequence_variant	NA	NA	NA	NA	NA	NA	NA	NA	NA	3_prime_UTR_variant&NMD_transcript_variant;synonymous_variant;non_coding_transcript_exon_variant	3	195751049	C	T	1.74191e-05	1	172225	ADD	4.04067	1.37026	8.69567	2.49625	NA	CD
3:195751071:C:T	3	195751071	C	T	MUC4	3_prime_UTR_variant&NMD_transcript_variant;stop_gained;stop_gained;non_coding_transcript_exon_variant	stop_gained	high	feature_truncation	highConf	NA	NA	NA	NA	NA	NA	NA	NA	3_prime_UTR_variant&NMD_transcript_variant;stop_gained;stop_gained;non_coding_transcript_exon_variant	3	195751071	C	T	8.70954e-06	1	172225	ADD	3.8698	1.39374	7.70927	2.26013	NA	UC
3:195751210:C:T	3	195751210	C	T	MUC4	3_prime_UTR_variant&NMD_transcript_variant;missense_variant;missense_variant;non_coding_transcript_exon_variant;missense_variant	missense_variant	moderate	coding_sequence_variant	NA	NA	NA	NA;0.013;0.013;NA;0.013	0.013	NA;tolerated;tolerated_low_confidence;NA;tolerated_low_confidence	tolerated_low_confidence	NA;benign;benign;NA;benign	benign	3_prime_UTR_variant&NMD_transcript_variant;missense_variant;missense_variant;non_coding_transcript_exon_variant;missense_variant	3	195751210	C	T	8.70954e-06	1	172225	ADD	4.28313	1.42905	8.98318	2.56467	NA	UC
3:195751327:C:T	3	195751327	C	T	MUC4	intron_variant&NMD_transcript_variant;intron_variant;intron_variant&non_coding_transcript_variant;non_coding_transcript_exon_variant	non_coding_transcript_exon_variant	modifier	non_coding_transcript_variant	NA	NA	NA	NA	NA	NA	NA	NA	NA	intron_variant&NMD_transcript_variant;intron_variant;intron_variant&non_coding_transcript_variant;non_coding_transcript_exon_variant	3	195751327	C	T	3.48381e-05	1	172225	ADD	3.47094	1.29184	7.21896	2.14184	NA	CD
3:195751602:T:C	3	195751602	T	C	MUC4	intron_variant&NMD_transcript_variant;intron_variant;intron_variant&non_coding_transcript_variant;non_coding_transcript_exon_variant	non_coding_transcript_exon_variant	modifier	non_coding_transcript_variant	NA	NA	NA	NA	NA	NA	NA	NA	NA	intron_variant&NMD_transcript_variant;intron_variant;intron_variant&non_coding_transcript_variant;non_coding_transcript_exon_variant	3	195751602	T	C	8.70954e-06	1	172225	ADD	3.74982	1.36703	7.52431	2.21558	NA	UC
3:195752174:TATG:T	3	195752174	TATG	T	MUC4	intron_variant&NMD_transcript_variant;intron_variant;intron_variant&non_coding_transcript_variant;non_coding_transcript_exon_variant	non_coding_transcript_exon_variant	modifier	non_coding_transcript_variant	NA	NA	NA	NA	NA	NA	NA	NA	NA	intron_variant&NMD_transcript_variant;intron_variant;intron_variant&non_coding_transcript_variant;non_coding_transcript_exon_variant	3	195752174	TATG	T	0.000124837	1	172225	ADD	2.30944	0.885783	6.79765	2.03963	NA	CD
3:195752314:C:T	3	195752314	C	T	MUC4	intron_variant&NMD_transcript_variant;intron_variant;intron_variant&non_coding_transcript_variant;non_coding_transcript_exon_variant	non_coding_transcript_exon_variant	modifier	non_coding_transcript_variant	NA	NA	NA	NA	NA	NA	NA	NA	NA	intron_variant&NMD_transcript_variant;intron_variant;intron_variant&non_coding_transcript_variant;non_coding_transcript_exon_variant	3	195752314	C	T	2.61286e-05	1	172225	ADD	2.98264	0.980437	9.25467	2.62912	NA	UC
3:195752366:C:T	3	195752366	C	T	MUC4	splice_region_variant&intron_variant&NMD_transcript_variant;splice_region_variant&intron_variant;splice_region_variant&intron_variant&non_coding_transcript_variant;non_coding_transcript_exon_variant	splice_region_variant	low	intron_variant	NA	NA	NA	NA	NA	NA	NA	NA	NA	splice_region_variant&intron_variant&NMD_transcript_variant;splice_region_variant&intron_variant;splice_region_variant&intron_variant&non_coding_transcript_variant;non_coding_transcript_exon_variant	3	195752366	C	T	0.0444854	1	172225	ADD	-0.38169	0.114807	11.0532	3.05288	NA	CD
3:195752592:A:C	3	195752592	A	C	MUC4	intron_variant&NMD_transcript_variant;intron_variant;intron_variant&non_coding_transcript_variant;upstream_gene_variant	intron_variant	modifier	intron_variant	NA	NA	NA	NA	NA	NA	NA	NA	NA	intron_variant&NMD_transcript_variant;intron_variant;intron_variant&non_coding_transcript_variant;upstream_gene_variant	3	195752592	A	C	2.03223e-05	1	172225	ADD	3.75768	1.35083	7.73812	2.26707	NA	CD
3:195752625:G:A	3	195752625	G	A	MUC4	intron_variant&NMD_transcript_variant;intron_variant;intron_variant&non_coding_transcript_variant;upstream_gene_variant	intron_variant	modifier	intron_variant	NA	NA	NA	NA	NA	NA	NA	NA	NA	intron_variant&NMD_transcript_variant;intron_variant;intron_variant&non_coding_transcript_variant;upstream_gene_variant	3	195752625	G	A	2.32254e-05	1	172225	ADD	3.07398	1.00444	9.36607	2.65553	NA	UC
3:195752646:A:G	3	195752646	A	G	MUC4	intron_variant&NMD_transcript_variant;intron_variant;intron_variant&non_coding_transcript_variant;upstream_gene_variant	intron_variant	modifier	intron_variant	NA	NA	NA	NA	NA	NA	NA	NA	NA	intron_variant&NMD_transcript_variant;intron_variant;intron_variant&non_coding_transcript_variant;upstream_gene_variant	3	195752646	A	G	8.70954e-06	1	172225	ADD	5.2508	1.69976	9.5428	2.69738	NA	CD
3:195752681:G:A	3	195752681	G	A	MUC4	intron_variant&NMD_transcript_variant;intron_variant;intron_variant&non_coding_transcript_variant;upstream_gene_variant	intron_variant	modifier	intron_variant	NA	NA	NA	NA	NA	NA	NA	NA	NA	intron_variant&NMD_transcript_variant;intron_variant;intron_variant&non_coding_transcript_variant;upstream_gene_variant	3	195752681	G	A	4.06445e-05	1	172225	ADD	2.46039	0.921307	7.13184	2.12075	NA	UC
3:195752843:T:C	3	195752843	T	C	MUC4	intron_variant&NMD_transcript_variant;intron_variant;intron_variant&non_coding_transcript_variant;upstream_gene_variant	intron_variant	modifier	intron_variant	NA	NA	NA	NA	NA	NA	NA	NA	NA	intron_variant&NMD_transcript_variant;intron_variant;intron_variant&non_coding_transcript_variant;upstream_gene_variant	3	195752843	T	C	1.74191e-05	1	172225	ADD	4.04233	1.37922	8.59004	2.47107	NA	UC
3:195752864:C:T	3	195752864	C	T	MUC4	intron_variant&NMD_transcript_variant;intron_variant;intron_variant&non_coding_transcript_variant;upstream_gene_variant	intron_variant	modifier	intron_variant	NA	NA	NA	NA	NA	NA	NA	NA	NA	intron_variant&NMD_transcript_variant;intron_variant;intron_variant&non_coding_transcript_variant;upstream_gene_variant	3	195752864	C	T	8.70954e-06	1	172225	ADD	4.23223	1.4432	8.59976	2.47339	NA	CD
3:195752981:G:A	3	195752981	G	A	MUC4	intron_variant&NMD_transcript_variant;intron_variant;intron_variant&non_coding_transcript_variant;upstream_gene_variant	intron_variant	modifier	intron_variant	NA	NA	NA	NA	NA	NA	NA	NA	NA	intron_variant&NMD_transcript_variant;intron_variant;intron_variant&non_coding_transcript_variant;upstream_gene_variant	3	195752981	G	A	0.00062999	1	172225	ADD	1.46822	0.536274	7.49562	2.20867	NA	CD
3:195752989:G:A	3	195752989	G	A	MUC4	intron_variant&NMD_transcript_variant;intron_variant;intron_variant&non_coding_transcript_variant;upstream_gene_variant	intron_variant	modifier	intron_variant	NA	NA	NA	NA	NA	NA	NA	NA	NA	intron_variant&NMD_transcript_variant;intron_variant;intron_variant&non_coding_transcript_variant;upstream_gene_variant	3	195752989	G	A	0.000325156	1	172225	ADD	1.62782	0.508335	10.2545	2.86533	NA	UC
3:195753224:C:T	3	195753224	C	T	MUC4	3_prime_UTR_variant&NMD_transcript_variant;missense_variant;missense_variant;non_coding_transcript_exon_variant;upstream_gene_variant;missense_variant&NMD_transcript_variant;intron_variant&NMD_transcript_variant	missense_variant	moderate	coding_sequence_variant	NA	NA	NA	NA;0.015;0.015;NA;NA;NA;NA	0.015	NA;tolerated;tolerated_low_confidence;NA;NA;deleterious_low_confidence;NA	deleterious_low_confidence	NA;benign;benign;NA;NA;probably_damaging;NA	probably_damaging	3_prime_UTR_variant&NMD_transcript_variant;missense_variant;missense_variant;non_coding_transcript_exon_variant;upstream_gene_variant;missense_variant&NMD_transcript_variant;intron_variant&NMD_transcript_variant	3	195753224	C	T	6.67731e-05	1	172225	ADD	2.52808	0.916448	7.60969	2.23616	NA	UC
3:195753224:C:T	3	195753224	C	T	MUC4	3_prime_UTR_variant&NMD_transcript_variant;missense_variant;missense_variant;non_coding_transcript_exon_variant;upstream_gene_variant;missense_variant&NMD_transcript_variant;intron_variant&NMD_transcript_variant	missense_variant	moderate	coding_sequence_variant	NA	NA	NA	NA;0.015;0.015;NA;NA;NA;NA	0.015	NA;tolerated;tolerated_low_confidence;NA;NA;deleterious_low_confidence;NA	deleterious_low_confidence	NA;benign;benign;NA;NA;probably_damaging;NA	probably_damaging	3_prime_UTR_variant&NMD_transcript_variant;missense_variant;missense_variant;non_coding_transcript_exon_variant;upstream_gene_variant;missense_variant&NMD_transcript_variant;intron_variant&NMD_transcript_variant	3	195753224	C	T	6.67731e-05	1	172225	ADD	2.6941	0.941161	8.19407	2.37647	NA	CD
3:195753817:G:A	3	195753817	G	A	MUC4	intron_variant&NMD_transcript_variant;intron_variant;non_coding_transcript_exon_variant;upstream_gene_variant	non_coding_transcript_exon_variant	modifier	non_coding_transcript_variant	NA	NA	NA	NA	NA	NA	NA	NA	NA	intron_variant&NMD_transcript_variant;intron_variant;non_coding_transcript_exon_variant;upstream_gene_variant	3	195753817	G	A	3.48381e-05	1	172225	ADD	3.34293	1.28071	6.81318	2.04341	NA	CD
3:195753912:G:A	3	195753912	G	A	MUC4	intron_variant&NMD_transcript_variant;intron_variant;non_coding_transcript_exon_variant;upstream_gene_variant	non_coding_transcript_exon_variant	modifier	non_coding_transcript_variant	NA	NA	NA	NA	NA	NA	NA	NA	NA	intron_variant&NMD_transcript_variant;intron_variant;non_coding_transcript_exon_variant;upstream_gene_variant	3	195753912	G	A	1.16127e-05	1	172225	ADD	4.37331	1.43112	9.33837	2.64897	NA	CD
3:195754155:C:G	3	195754155	C	G	MUC4	intron_variant&NMD_transcript_variant;intron_variant;upstream_gene_variant	intron_variant	modifier	intron_variant	NA	NA	NA	NA	NA	NA	NA	NA	NA	intron_variant&NMD_transcript_variant;intron_variant;upstream_gene_variant	3	195754155	C	G	8.70954e-06	1	172225	ADD	4.88956	1.5789	9.5903	2.70861	NA	UC
3:195754289:C:T	3	195754289	C	T	MUC4	3_prime_UTR_variant&NMD_transcript_variant;synonymous_variant;intron_variant&NMD_transcript_variant;upstream_gene_variant	synonymous_variant	low	coding_sequence_variant	NA	NA	NA	NA	NA	NA	NA	NA	NA	3_prime_UTR_variant&NMD_transcript_variant;synonymous_variant;intron_variant&NMD_transcript_variant;upstream_gene_variant	3	195754289	C	T	1.45159e-05	1	172225	ADD	3.61362	1.34547	7.21336	2.14049	NA	UC
3:195754298:C:T	3	195754298	C	T	MUC4	3_prime_UTR_variant&NMD_transcript_variant;synonymous_variant;intron_variant&NMD_transcript_variant;upstream_gene_variant	synonymous_variant	low	coding_sequence_variant	NA	NA	NA	NA	NA	NA	NA	NA	NA	3_prime_UTR_variant&NMD_transcript_variant;synonymous_variant;intron_variant&NMD_transcript_variant;upstream_gene_variant	3	195754298	C	T	0.000148062	1	172225	ADD	2.366	0.890582	7.05799	2.10285	NA	CD
3:195754351:C:T	3	195754351	C	T	MUC4	3_prime_UTR_variant&NMD_transcript_variant;missense_variant;missense_variant;intron_variant&NMD_transcript_variant;missense_variant;upstream_gene_variant;missense_variant	missense_variant	moderate	coding_sequence_variant	NA	NA	NA	NA;0.040;0.040;NA;0.040;NA;0.040	0.04	NA;tolerated;tolerated;NA;tolerated_low_confidence;NA;tolerated_low_confidence	tolerated_low_confidence	NA;benign;benign;NA;benign;NA;benign	benign	3_prime_UTR_variant&NMD_transcript_variant;missense_variant;missense_variant;intron_variant&NMD_transcript_variant;missense_variant;upstream_gene_variant;missense_variant	3	195754351	C	T	8.70954e-06	1	172225	ADD	5.42434	1.87433	8.37534	2.41982	NA	CD
3:195755524:G:C	3	195755524	G	C	MUC4	intron_variant&NMD_transcript_variant;intron_variant;upstream_gene_variant	intron_variant	modifier	intron_variant	NA	NA	NA	NA	NA	NA	NA	NA	NA	intron_variant&NMD_transcript_variant;intron_variant;upstream_gene_variant	3	195755524	G	C	2.32254e-05	1	172225	ADD	3.50949	1.0365	11.4644	3.14911	NA	UC
3:195755816:C:T	3	195755816	C	T	MUC4	intron_variant&NMD_transcript_variant;intron_variant;upstream_gene_variant	intron_variant	modifier	intron_variant	NA	NA	NA	NA	NA	NA	NA	NA	NA	intron_variant&NMD_transcript_variant;intron_variant;upstream_gene_variant	3	195755816	C	T	0.000101611	1	172225	ADD	2.30685	0.88572	6.78338	2.03616	NA	CD
3:195757313:A:AGG	3	195757313	A	AGG	MUC4	3_prime_UTR_variant&NMD_transcript_variant;frameshift_variant;upstream_gene_variant;frameshift_variant&NMD_transcript_variant;intron_variant&NMD_transcript_variant	frameshift_variant	high	coding_sequence_variant	highConf	NA	NA	NA	NA	NA	NA	NA	NA	3_prime_UTR_variant&NMD_transcript_variant;frameshift_variant;upstream_gene_variant;frameshift_variant&NMD_transcript_variant;intron_variant&NMD_transcript_variant	3	195757313	A	AGG	1.45159e-05	1	172225	ADD	3.58446	1.35677	6.97968	2.08386	NA	CD
3:195760701:G:A	3	195760701	G	A	MUC4	intron_variant&NMD_transcript_variant;intron_variant	intron_variant	modifier	intron_variant	NA	NA	NA	NA	NA	NA	NA	NA	NA	intron_variant&NMD_transcript_variant;intron_variant	3	195760701	G	A	1.74191e-05	1	172225	ADD	3.63337	1.32926	7.47132	2.20281	NA	CD
3:195760906:G:A	3	195760906	G	A	MUC4	3_prime_UTR_variant&NMD_transcript_variant;synonymous_variant;synonymous_variant&NMD_transcript_variant	synonymous_variant	low	coding_sequence_variant	NA	NA	NA	NA	NA	NA	NA	NA	NA	3_prime_UTR_variant&NMD_transcript_variant;synonymous_variant;synonymous_variant&NMD_transcript_variant	3	195760906	G	A	1.74191e-05	1	172225	ADD	3.63898	1.33841	7.39232	2.18374	NA	UC
3:195761991:A:G	3	195761991	A	G	MUC4	intron_variant&NMD_transcript_variant;intron_variant;downstream_gene_variant	intron_variant	modifier	intron_variant	NA	NA	NA	NA	NA	NA	NA	NA	NA	intron_variant&NMD_transcript_variant;intron_variant;downstream_gene_variant	3	195761991	A	G	1.16127e-05	1	172225	ADD	3.51849	1.34277	6.86606	2.05627	NA	UC
3:195762007:G:C	3	195762007	G	C	MUC4	intron_variant&NMD_transcript_variant;intron_variant;downstream_gene_variant	intron_variant	modifier	intron_variant	NA	NA	NA	NA	NA	NA	NA	NA	NA	intron_variant&NMD_transcript_variant;intron_variant;downstream_gene_variant	3	195762007	G	C	1.45159e-05	1	172225	ADD	3.84465	1.35435	8.05844	2.34398	NA	CD
3:195762077:C:T	3	195762077	C	T	MUC4	intron_variant&NMD_transcript_variant;intron_variant;downstream_gene_variant	intron_variant	modifier	intron_variant	NA	NA	NA	NA	NA	NA	NA	NA	NA	intron_variant&NMD_transcript_variant;intron_variant;downstream_gene_variant	3	195762077	C	T	1.45159e-05	1	172225	ADD	3.61383	1.34572	7.2115	2.14003	NA	CD
3:195763060:G:T	3	195763060	G	T	MUC4	intron_variant&NMD_transcript_variant;intron_variant;downstream_gene_variant	intron_variant	modifier	intron_variant	NA	NA	NA	NA	NA	NA	NA	NA	NA	intron_variant&NMD_transcript_variant;intron_variant;downstream_gene_variant	3	195763060	G	T	2.61286e-05	1	172225	ADD	3.35901	1.29871	6.68953	2.01331	NA	CD
3:195763433:C:T	3	195763433	C	T	MUC4	splice_region_variant&3_prime_UTR_variant&NMD_transcript_variant;splice_region_variant&synonymous_variant;splice_region_variant&synonymous_variant&NMD_transcript_variant;downstream_gene_variant	splice_region_variant	low	intron_variant	NA	NA	NA	NA	NA	NA	NA	NA	NA	splice_region_variant&3_prime_UTR_variant&NMD_transcript_variant;splice_region_variant&synonymous_variant;splice_region_variant&synonymous_variant&NMD_transcript_variant;downstream_gene_variant	3	195763433	C	T	1.45159e-05	1	172225	ADD	4.09275	1.38721	8.70449	2.49836	NA	CD
3:195763442:G:T	3	195763442	G	T	MUC4	3_prime_UTR_variant&NMD_transcript_variant;synonymous_variant;synonymous_variant&NMD_transcript_variant;downstream_gene_variant	synonymous_variant	low	coding_sequence_variant	NA	NA	NA	NA	NA	NA	NA	NA	NA	3_prime_UTR_variant&NMD_transcript_variant;synonymous_variant;synonymous_variant&NMD_transcript_variant;downstream_gene_variant	3	195763442	G	T	1.16127e-05	1	172225	ADD	4.92218	1.47601	11.1207	3.06871	NA	CD
3:195763513:C:T	3	195763513	C	T	MUC4	3_prime_UTR_variant&NMD_transcript_variant;missense_variant;missense_variant;missense_variant;missense_variant&NMD_transcript_variant;downstream_gene_variant	missense_variant	moderate	coding_sequence_variant	NA	NA	NA	NA;0.201;0.201;0.201;0.201;NA	0.201	NA;deleterious;deleterious;deleterious_low_confidence;deleterious_low_confidence;NA	deleterious	NA;probably_damaging;probably_damaging;probably_damaging;possibly_damaging;NA	probably_damaging	3_prime_UTR_variant&NMD_transcript_variant;missense_variant;missense_variant;missense_variant;missense_variant&NMD_transcript_variant;downstream_gene_variant	3	195763513	C	T	2.03223e-05	1	172225	ADD	3.53982	1.31586	7.23673	2.14614	NA	UC
3:195763513:C:T	3	195763513	C	T	MUC4	3_prime_UTR_variant&NMD_transcript_variant;missense_variant;missense_variant;missense_variant;missense_variant&NMD_transcript_variant;downstream_gene_variant	missense_variant	moderate	coding_sequence_variant	NA	NA	NA	NA;0.201;0.201;0.201;0.201;NA	0.201	NA;deleterious;deleterious;deleterious_low_confidence;deleterious_low_confidence;NA	deleterious	NA;probably_damaging;probably_damaging;probably_damaging;possibly_damaging;NA	probably_damaging	3_prime_UTR_variant&NMD_transcript_variant;missense_variant;missense_variant;missense_variant;missense_variant&NMD_transcript_variant;downstream_gene_variant	3	195763513	C	T	2.03223e-05	1	172225	ADD	4.53685	1.41989	10.2093	2.85471	NA	CD
3:195764545:AG:A	3	195764545	AG	A	MUC4	intron_variant&NMD_transcript_variant;intron_variant;downstream_gene_variant	intron_variant	modifier	intron_variant	NA	NA	NA	NA	NA	NA	NA	NA	NA	intron_variant&NMD_transcript_variant;intron_variant;downstream_gene_variant	3	195764545	AG	A	0.000116127	1	172225	ADD	2.4835	0.901855	7.58324	2.22979	NA	CD
3:195765141:C:T	3	195765141	C	T	MUC4	intron_variant&NMD_transcript_variant;intron_variant;downstream_gene_variant	intron_variant	modifier	intron_variant	NA	NA	NA	NA	NA	NA	NA	NA	NA	intron_variant&NMD_transcript_variant;intron_variant;downstream_gene_variant	3	195765141	C	T	1.16127e-05	1	172225	ADD	3.56613	1.33768	7.10706	2.11475	NA	UC
3:195765457:C:T	3	195765457	C	T	MUC4	splice_polypyrimidine_tract_variant&splice_region_variant&intron_variant&NMD_transcript_variant;splice_polypyrimidine_tract_variant&splice_region_variant&intron_variant;downstream_gene_variant	splice_region_variant	low	intron_variant	NA	NA	NA	NA	NA	NA	NA	NA	NA	splice_polypyrimidine_tract_variant&splice_region_variant&intron_variant&NMD_transcript_variant;splice_polypyrimidine_tract_variant&splice_region_variant&intron_variant;downstream_gene_variant	3	195765457	C	T	0.000107418	1	172225	ADD	2.75264	0.789976	12.1415	3.30705	NA	CD
3:195765475:G:A	3	195765475	G	A	MUC4	intron_variant&NMD_transcript_variant;intron_variant;downstream_gene_variant	intron_variant	modifier	intron_variant	NA	NA	NA	NA	NA	NA	NA	NA	NA	intron_variant&NMD_transcript_variant;intron_variant;downstream_gene_variant	3	195765475	G	A	3.1935e-05	1	172225	ADD	3.40824	1.29166	6.96245	2.07968	NA	CD
3:195766419:ATC:A	3	195766419	ATC	A	MUC4	intron_variant&NMD_transcript_variant;intron_variant;downstream_gene_variant	intron_variant	modifier	intron_variant	NA	NA	NA	NA	NA	NA	NA	NA	NA	intron_variant&NMD_transcript_variant;intron_variant;downstream_gene_variant	3	195766419	ATC	A	1.16127e-05	1	172225	ADD	5.47804	1.12711	23.6219	5.9309	NA	UC
3:195766419:ATC:A	3	195766419	ATC	A	MUC4	intron_variant&NMD_transcript_variant;intron_variant;downstream_gene_variant	intron_variant	modifier	intron_variant	NA	NA	NA	NA	NA	NA	NA	NA	NA	intron_variant&NMD_transcript_variant;intron_variant;downstream_gene_variant	3	195766419	ATC	A	1.16127e-05	1	172225	ADD	4.29976	1.41241	9.26763	2.6322	NA	CD
3:195766619:G:A	3	195766619	G	A	MUC4	intron_variant&NMD_transcript_variant;intron_variant;downstream_gene_variant	intron_variant	modifier	intron_variant	NA	NA	NA	NA	NA	NA	NA	NA	NA	intron_variant&NMD_transcript_variant;intron_variant;downstream_gene_variant	3	195766619	G	A	7.25795e-05	1	172225	ADD	2.28982	0.774179	8.74822	2.50877	NA	UC
3:195766715:G:A	3	195766715	G	A	MUC4	intron_variant&NMD_transcript_variant;3_prime_UTR_variant&NMD_transcript_variant;synonymous_variant;missense_variant&NMD_transcript_variant;synonymous_variant&NMD_transcript_variant;non_coding_transcript_exon_variant	missense_variant	moderate	coding_sequence_variant	NA	NA	NA	NA	NA	NA	NA	NA;NA;NA;benign;NA;NA	benign	intron_variant&NMD_transcript_variant;3_prime_UTR_variant&NMD_transcript_variant;synonymous_variant;missense_variant&NMD_transcript_variant;synonymous_variant&NMD_transcript_variant;non_coding_transcript_exon_variant	3	195766715	G	A	1.16127e-05	1	172225	ADD	4.34639	1.47313	8.7052	2.49853	NA	UC
3:195768384:A:G	3	195768384	A	G	MUC4	intron_variant&NMD_transcript_variant;intron_variant;intron_variant&non_coding_transcript_variant	intron_variant	modifier	intron_variant	NA	NA	NA	NA	NA	NA	NA	NA	NA	intron_variant&NMD_transcript_variant;intron_variant;intron_variant&non_coding_transcript_variant	3	195768384	A	G	1.45159e-05	1	172225	ADD	4.03095	1.37345	8.61371	2.47672	NA	UC
3:195768789:G:A	3	195768789	G	A	MUC4	intron_variant&NMD_transcript_variant;intron_variant;intron_variant&non_coding_transcript_variant	intron_variant	modifier	intron_variant	NA	NA	NA	NA	NA	NA	NA	NA	NA	intron_variant&NMD_transcript_variant;intron_variant;intron_variant&non_coding_transcript_variant	3	195768789	G	A	1.45159e-05	1	172225	ADD	4.26802	1.39972	9.29755	2.63929	NA	CD
3:195768934:C:A	3	195768934	C	A	MUC4	intron_variant&NMD_transcript_variant;intron_variant;intron_variant&non_coding_transcript_variant	intron_variant	modifier	intron_variant	NA	NA	NA	NA	NA	NA	NA	NA	NA	intron_variant&NMD_transcript_variant;intron_variant;intron_variant&non_coding_transcript_variant	3	195768934	C	A	1.16127e-05	1	172225	ADD	4.30891	1.43604	9.00335	2.56946	NA	UC
3:195769191:G:C	3	195769191	G	C	MUC4	intron_variant&NMD_transcript_variant;intron_variant;intron_variant&non_coding_transcript_variant	intron_variant	modifier	intron_variant	NA	NA	NA	NA	NA	NA	NA	NA	NA	intron_variant&NMD_transcript_variant;intron_variant;intron_variant&non_coding_transcript_variant	3	195769191	G	C	1.16127e-05	1	172225	ADD	4.02469	1.43563	7.8592	2.29617	NA	UC
3:195769335:C:T	3	195769335	C	T	MUC4	intron_variant&NMD_transcript_variant;intron_variant;intron_variant&non_coding_transcript_variant	intron_variant	modifier	intron_variant	NA	NA	NA	NA	NA	NA	NA	NA	NA	intron_variant&NMD_transcript_variant;intron_variant;intron_variant&non_coding_transcript_variant	3	195769335	C	T	5.80636e-05	1	172225	ADD	2.78448	0.940176	8.77144	2.5143	NA	UC
3:195769335:C:T	3	195769335	C	T	MUC4	intron_variant&NMD_transcript_variant;intron_variant;intron_variant&non_coding_transcript_variant	intron_variant	modifier	intron_variant	NA	NA	NA	NA	NA	NA	NA	NA	NA	intron_variant&NMD_transcript_variant;intron_variant;intron_variant&non_coding_transcript_variant	3	195769335	C	T	5.80636e-05	1	172225	ADD	3.28768	0.985128	11.1377	3.07267	NA	CD
3:195769687:A:G	3	195769687	A	G	MUC4	intron_variant&NMD_transcript_variant;intron_variant;non_coding_transcript_exon_variant	non_coding_transcript_exon_variant	modifier	non_coding_transcript_variant	NA	NA	NA	NA	NA	NA	NA	NA	NA	intron_variant&NMD_transcript_variant;intron_variant;non_coding_transcript_exon_variant	3	195769687	A	G	1.16127e-05	1	172225	ADD	3.9658	1.40961	7.91518	2.30961	NA	CD
3:195770711:A:G	3	195770711	A	G	MUC4	intron_variant&NMD_transcript_variant;intron_variant;3_prime_UTR_variant&NMD_transcript_variant;upstream_gene_variant	3_prime_UTR_variant	modifier	UTR_variant	NA	NA	NA	NA	NA	NA	NA	NA	NA	intron_variant&NMD_transcript_variant;intron_variant;3_prime_UTR_variant&NMD_transcript_variant;upstream_gene_variant	3	195770711	A	G	1.74191e-05	1	172225	ADD	4.05635	1.37376	8.7187	2.50174	NA	CD
3:195771535:C:T	3	195771535	C	T	MUC4	intron_variant&NMD_transcript_variant;intron_variant;upstream_gene_variant	intron_variant	modifier	intron_variant	NA	NA	NA	NA	NA	NA	NA	NA	NA	intron_variant&NMD_transcript_variant;intron_variant;upstream_gene_variant	3	195771535	C	T	0.000754827	1	172225	ADD	1.54037	0.464934	10.9766	3.03495	NA	CD
3:195772072:G:A	3	195772072	G	A	MUC4	intron_variant&NMD_transcript_variant;intron_variant;upstream_gene_variant	intron_variant	modifier	intron_variant	NA	NA	NA	NA	NA	NA	NA	NA	NA	intron_variant&NMD_transcript_variant;intron_variant;upstream_gene_variant	3	195772072	G	A	2.03223e-05	1	172225	ADD	3.66086	1.32897	7.5882	2.23098	NA	CD
3:195772623:T:C	3	195772623	T	C	MUC4	intron_variant&NMD_transcript_variant;intron_variant;upstream_gene_variant	intron_variant	modifier	intron_variant	NA	NA	NA	NA	NA	NA	NA	NA	NA	intron_variant&NMD_transcript_variant;intron_variant;upstream_gene_variant	3	195772623	T	C	4.06445e-05	1	172225	ADD	3.34647	1.26948	6.94897	2.07641	NA	CD
3:195772749:G:A	3	195772749	G	A	MUC4	intron_variant&NMD_transcript_variant;intron_variant;upstream_gene_variant	intron_variant	modifier	intron_variant	NA	NA	NA	NA	NA	NA	NA	NA	NA	intron_variant&NMD_transcript_variant;intron_variant;upstream_gene_variant	3	195772749	G	A	1.16127e-05	1	172225	ADD	3.45031	1.31219	6.91388	2.06788	NA	UC
3:195773586:A:G	3	195773586	A	G	MUC4	intron_variant&NMD_transcript_variant;intron_variant;upstream_gene_variant	intron_variant	modifier	intron_variant	NA	NA	NA	NA	NA	NA	NA	NA	NA	intron_variant&NMD_transcript_variant;intron_variant;upstream_gene_variant	3	195773586	A	G	1.74279e-05	1	172138	ADD	3.52346	1.30592	7.27953	2.15649	NA	UC
3:195773907:G:A	3	195773907	G	A	MUC4	intron_variant&NMD_transcript_variant;intron_variant;upstream_gene_variant	intron_variant	modifier	intron_variant	NA	NA	NA	NA	NA	NA	NA	NA	NA	intron_variant&NMD_transcript_variant;intron_variant;upstream_gene_variant	3	195773907	G	A	5.22572e-05	1	172225	ADD	2.38458	0.912724	6.82569	2.04645	NA	UC
3:195773959:C:T	3	195773959	C	T	MUC4	intron_variant&NMD_transcript_variant;intron_variant;upstream_gene_variant	intron_variant	modifier	intron_variant	NA	NA	NA	NA	NA	NA	NA	NA	NA	intron_variant&NMD_transcript_variant;intron_variant;upstream_gene_variant	3	195773959	C	T	2.32254e-05	1	172225	ADD	3.54336	1.31485	7.26237	2.15234	NA	CD
3:195774015:C:T	3	195774015	C	T	MUC4	intron_variant&NMD_transcript_variant;intron_variant;upstream_gene_variant	intron_variant	modifier	intron_variant	NA	NA	NA	NA	NA	NA	NA	NA	NA	intron_variant&NMD_transcript_variant;intron_variant;upstream_gene_variant	3	195774015	C	T	1.74191e-05	1	172225	ADD	3.97507	1.36205	8.51728	2.45372	NA	UC
3:195774229:T:C	3	195774229	T	C	MUC4	missense_variant&NMD_transcript_variant;synonymous_variant&NMD_transcript_variant;synonymous_variant;upstream_gene_variant	missense_variant	moderate	coding_sequence_variant	NA	NA	NA	NA	NA	NA	NA	unknown;NA;NA;NA	unknown	missense_variant&NMD_transcript_variant;synonymous_variant&NMD_transcript_variant;synonymous_variant;upstream_gene_variant	3	195774229	T	C	0.000249673	1	172225	ADD	1.90705	0.714561	7.12269	2.11853	NA	CD
3:195775194:C:T	3	195775194	C	T	MUC4	intron_variant&NMD_transcript_variant;intron_variant	intron_variant	modifier	intron_variant	NA	NA	NA	NA	NA	NA	NA	NA	NA	intron_variant&NMD_transcript_variant;intron_variant	3	195775194	C	T	6.96763e-05	1	172225	ADD	2.53591	0.914204	7.69452	2.25658	NA	UC
3:195775245:C:T	3	195775245	C	T	MUC4	intron_variant&NMD_transcript_variant;intron_variant	intron_variant	modifier	intron_variant	NA	NA	NA	NA	NA	NA	NA	NA	NA	intron_variant&NMD_transcript_variant;intron_variant	3	195775245	C	T	8.99985e-05	1	172225	ADD	2.71142	0.924727	8.59739	2.47283	NA	CD
3:195775252:T:G	3	195775252	T	G	MUC4	intron_variant&NMD_transcript_variant;intron_variant	intron_variant	modifier	intron_variant	NA	NA	NA	NA	NA	NA	NA	NA	NA	intron_variant&NMD_transcript_variant;intron_variant	3	195775252	T	G	1.45159e-05	1	172225	ADD	3.64902	1.35314	7.27222	2.15472	NA	UC
3:195777996:C:T	3	195777996	C	T	MUC4	intron_variant&NMD_transcript_variant;intron_variant	intron_variant	modifier	intron_variant	NA	NA	NA	NA	NA	NA	NA	NA	NA	intron_variant&NMD_transcript_variant;intron_variant	3	195777996	C	T	8.70954e-06	1	172225	ADD	4.47011	1.47371	9.20048	2.61627	NA	UC
3:195778070:C:T	3	195778070	C	T	MUC4	intron_variant&NMD_transcript_variant;intron_variant	intron_variant	modifier	intron_variant	NA	NA	NA	NA	NA	NA	NA	NA	NA	intron_variant&NMD_transcript_variant;intron_variant	3	195778070	C	T	0.000171288	1	172225	ADD	2.24841	0.74316	9.15352	2.60513	NA	CD
3:195778477:G:A	3	195778477	G	A	MUC4	intron_variant&NMD_transcript_variant;intron_variant	intron_variant	modifier	intron_variant	NA	NA	NA	NA	NA	NA	NA	NA	NA	intron_variant&NMD_transcript_variant;intron_variant	3	195778477	G	A	1.16127e-05	1	172225	ADD	4.01085	1.38779	8.35265	2.4144	NA	UC
3:195778669:G:C	3	195778669	G	C	MUC4	intron_variant&NMD_transcript_variant;intron_variant	intron_variant	modifier	intron_variant	NA	NA	NA	NA	NA	NA	NA	NA	NA	intron_variant&NMD_transcript_variant;intron_variant	3	195778669	G	C	1.74191e-05	1	172225	ADD	3.5126	1.32891	6.98657	2.08553	NA	CD
3:195778700:C:T	3	195778700	C	T	MUC4	intron_variant&NMD_transcript_variant;intron_variant	intron_variant	modifier	intron_variant	NA	NA	NA	NA	NA	NA	NA	NA	NA	intron_variant&NMD_transcript_variant;intron_variant	3	195778700	C	T	0.000635796	1	172225	ADD	1.84117	0.482543	14.5585	3.86686	NA	CD
3:195778856:C:A	3	195778856	C	A	MUC4	upstream_gene_variant;intron_variant;missense_variant&NMD_transcript_variant;missense_variant;missense_variant&NMD_transcript_variant;missense_variant&NMD_transcript_variant;missense_variant;missense_variant&NMD_transcript_variant;missense_variant&NMD_transcript_variant;missense_variant&NMD_transcript_variant;missense_variant&NMD_transcript_variant	missense_variant	moderate	coding_sequence_variant	NA	NA	NA	NA;NA;0.001;0.001;0.001;0.001;0.001;0.001;0.001;0.001;0.001	0.001	NA;NA;tolerated_low_confidence;tolerated_low_confidence;tolerated_low_confidence;tolerated_low_confidence;tolerated_low_confidence;tolerated_low_confidence;tolerated_low_confidence;tolerated_low_confidence;tolerated_low_confidence	tolerated_low_confidence	NA;NA;benign;benign;possibly_damaging;benign;benign;possibly_damaging;benign;possibly_damaging;benign	possibly_damaging	upstream_gene_variant;intron_variant;missense_variant&NMD_transcript_variant;missense_variant;missense_variant&NMD_transcript_variant;missense_variant&NMD_transcript_variant;missense_variant;missense_variant&NMD_transcript_variant;missense_variant&NMD_transcript_variant;missense_variant&NMD_transcript_variant;missense_variant&NMD_transcript_variant	3	195778856	C	A	1.74191e-05	1	172225	ADD	3.66273	1.32739	7.61395	2.23718	NA	CD
3:195778877:T:C	3	195778877	T	C	MUC4	upstream_gene_variant;intron_variant;missense_variant&NMD_transcript_variant;missense_variant;missense_variant&NMD_transcript_variant;missense_variant&NMD_transcript_variant;missense_variant&NMD_transcript_variant;missense_variant&NMD_transcript_variant	missense_variant	moderate	coding_sequence_variant	NA	NA	NA	NA;NA;0.022;0.022;0.022;0.022;0.022;0.022	0.022	NA;NA;deleterious_low_confidence;deleterious_low_confidence;deleterious_low_confidence;deleterious_low_confidence;deleterious_low_confidence;deleterious_low_confidence	deleterious_low_confidence	NA;NA;possibly_damaging;benign;benign;possibly_damaging;possibly_damaging;benign	possibly_damaging	upstream_gene_variant;intron_variant;missense_variant&NMD_transcript_variant;missense_variant;missense_variant&NMD_transcript_variant;missense_variant&NMD_transcript_variant;missense_variant&NMD_transcript_variant;missense_variant&NMD_transcript_variant	3	195778877	T	C	1.45159e-05	1	172225	ADD	4.11016	1.39782	8.64595	2.48441	NA	CD
3:195779082:A:T	3	195779082	A	T	MUC4	upstream_gene_variant;intron_variant;synonymous_variant&NMD_transcript_variant;synonymous_variant	synonymous_variant	low	coding_sequence_variant	NA	NA	NA	NA	NA	NA	NA	NA	NA	upstream_gene_variant;intron_variant;synonymous_variant&NMD_transcript_variant;synonymous_variant	3	195779082	A	T	1.74364e-05	1	172054	ADD	2.79632	1.08299	6.66693	2.00781	NA	CD
3:195779089:G:A	3	195779089	G	A	MUC4	upstream_gene_variant;intron_variant;missense_variant&NMD_transcript_variant;missense_variant;missense_variant&NMD_transcript_variant;missense_variant&NMD_transcript_variant;missense_variant;missense_variant&NMD_transcript_variant;missense_variant&NMD_transcript_variant;missense_variant&NMD_transcript_variant	missense_variant	moderate	coding_sequence_variant	NA	NA	NA	NA;NA;0.064;0.064;0.064;0.064;0.064;0.064;0.064;0.064	0.064	NA;NA;deleterious_low_confidence;deleterious_low_confidence;tolerated_low_confidence;deleterious_low_confidence;deleterious_low_confidence;deleterious_low_confidence;deleterious_low_confidence;tolerated_low_confidence	deleterious_low_confidence	NA;NA;possibly_damaging;possibly_damaging;possibly_damaging;possibly_damaging;probably_damaging;possibly_damaging;probably_damaging;possibly_damaging	probably_damaging	upstream_gene_variant;intron_variant;missense_variant&NMD_transcript_variant;missense_variant;missense_variant&NMD_transcript_variant;missense_variant&NMD_transcript_variant;missense_variant;missense_variant&NMD_transcript_variant;missense_variant&NMD_transcript_variant;missense_variant&NMD_transcript_variant	3	195779089	G	A	6.6836e-05	1	172063	ADD	2.20478	0.794047	7.70969	2.26023	NA	CD
3:195779116:G:C	3	195779116	G	C	MUC4	upstream_gene_variant;intron_variant;stop_gained&NMD_transcript_variant;stop_gained	stop_gained	high	feature_truncation	highConf	NA	NA	NA	NA	NA	NA	NA	NA	upstream_gene_variant;intron_variant;stop_gained&NMD_transcript_variant;stop_gained	3	195779116	G	C	2.61864e-05	1	171845	ADD	3.63005	1.31911	7.57294	2.2273	NA	CD
3:195780445:G:A	3	195780445	G	A	MUC4	upstream_gene_variant;intron_variant;missense_variant&NMD_transcript_variant;missense_variant;missense_variant&NMD_transcript_variant;missense_variant&NMD_transcript_variant;missense_variant&NMD_transcript_variant;missense_variant&NMD_transcript_variant;missense_variant&NMD_transcript_variant	missense_variant	moderate	coding_sequence_variant	NA	NA	NA	NA;NA;0.036;0.036;0.036;0.036;0.036;0.036;0.036	0.036	NA;NA;tolerated_low_confidence;deleterious_low_confidence;tolerated;deleterious_low_confidence;deleterious_low_confidence;deleterious_low_confidence;tolerated_low_confidence	deleterious_low_confidence	NA;NA;possibly_damaging;possibly_damaging;probably_damaging;possibly_damaging;possibly_damaging;possibly_damaging;possibly_damaging	probably_damaging	upstream_gene_variant;intron_variant;missense_variant&NMD_transcript_variant;missense_variant;missense_variant&NMD_transcript_variant;missense_variant&NMD_transcript_variant;missense_variant&NMD_transcript_variant;missense_variant&NMD_transcript_variant;missense_variant&NMD_transcript_variant	3	195780445	G	A	0.0127973	1	172224	ADD	-0.58746	0.224546	6.84455	2.05104	NA	CD
3:195781464:A:T	3	195781464	A	T	MUC4	upstream_gene_variant;intron_variant;synonymous_variant&NMD_transcript_variant;synonymous_variant	synonymous_variant	low	coding_sequence_variant	NA	NA	NA	NA	NA	NA	NA	NA	NA	upstream_gene_variant;intron_variant;synonymous_variant&NMD_transcript_variant;synonymous_variant	3	195781464	A	T	8.71197e-06	1	172177	ADD	4.64043	1.47535	9.89291	2.78011	NA	UC
3:195781513:C:A	3	195781513	C	A	MUC4	upstream_gene_variant;intron_variant;missense_variant&NMD_transcript_variant;missense_variant;missense_variant&NMD_transcript_variant;missense_variant;missense_variant&NMD_transcript_variant;missense_variant&NMD_transcript_variant;missense_variant&NMD_transcript_variant	missense_variant	moderate	coding_sequence_variant	NA	NA	NA	NA;NA;0.007;0.007;0.007;0.007;0.007;0.007;0.007	0.007	NA;NA;tolerated_low_confidence;deleterious_low_confidence;tolerated;deleterious_low_confidence;tolerated_low_confidence;deleterious_low_confidence;tolerated	deleterious_low_confidence	NA;NA;probably_damaging;probably_damaging;probably_damaging;probably_damaging;probably_damaging;probably_damaging;probably_damaging	probably_damaging	upstream_gene_variant;intron_variant;missense_variant&NMD_transcript_variant;missense_variant;missense_variant&NMD_transcript_variant;missense_variant;missense_variant&NMD_transcript_variant;missense_variant&NMD_transcript_variant;missense_variant&NMD_transcript_variant	3	195781513	C	A	7.26077e-05	1	172158	ADD	2.22801	0.822914	7.33038	2.16878	NA	UC
3:195781601:T:A	3	195781601	T	A	MUC4	upstream_gene_variant;intron_variant;missense_variant&NMD_transcript_variant;missense_variant;missense_variant&NMD_transcript_variant;missense_variant;missense_variant&NMD_transcript_variant;missense_variant&NMD_transcript_variant;missense_variant&NMD_transcript_variant;missense_variant&NMD_transcript_variant	missense_variant	moderate	coding_sequence_variant	NA	NA	NA	NA;NA;0.007;0.007;0.007;0.007;0.007;0.007;0.007;0.007	0.007	NA;NA;tolerated_low_confidence;tolerated_low_confidence;tolerated;tolerated_low_confidence;tolerated_low_confidence;deleterious_low_confidence;tolerated_low_confidence;tolerated	deleterious_low_confidence	NA;NA;possibly_damaging;benign;possibly_damaging;benign;possibly_damaging;benign;benign;benign	possibly_damaging	upstream_gene_variant;intron_variant;missense_variant&NMD_transcript_variant;missense_variant;missense_variant&NMD_transcript_variant;missense_variant;missense_variant&NMD_transcript_variant;missense_variant&NMD_transcript_variant;missense_variant&NMD_transcript_variant;missense_variant&NMD_transcript_variant	3	195781601	T	A	8.73607e-05	1	171702	ADD	2.16304	0.610123	12.5687	3.40644	NA	UC
3:195784040:G:T	3	195784040	G	T	MUC4	intron_variant;missense_variant&NMD_transcript_variant;missense_variant;missense_variant&NMD_transcript_variant;missense_variant&NMD_transcript_variant;missense_variant&NMD_transcript_variant;missense_variant&NMD_transcript_variant	missense_variant	moderate	coding_sequence_variant	NA	NA	NA	NA;0.030;0.030;0.030;0.030;0.030;0.030	0.03	NA;tolerated_low_confidence;deleterious_low_confidence;tolerated_low_confidence;tolerated_low_confidence;deleterious_low_confidence;tolerated_low_confidence	deleterious_low_confidence	NA;possibly_damaging;possibly_damaging;possibly_damaging;possibly_damaging;possibly_damaging;possibly_damaging	possibly_damaging	intron_variant;missense_variant&NMD_transcript_variant;missense_variant;missense_variant&NMD_transcript_variant;missense_variant&NMD_transcript_variant;missense_variant&NMD_transcript_variant;missense_variant&NMD_transcript_variant	3	195784040	G	T	8.70954e-06	1	172225	ADD	3.99907	1.39514	8.21635	2.3818	NA	UC
3:195784864:G:T	3	195784864	G	T	MUC4	intron_variant;missense_variant&NMD_transcript_variant;missense_variant;missense_variant&NMD_transcript_variant;missense_variant&NMD_transcript_variant;missense_variant&NMD_transcript_variant;missense_variant&NMD_transcript_variant;missense_variant&NMD_transcript_variant;missense_variant&NMD_transcript_variant	missense_variant	moderate	coding_sequence_variant	NA	NA	NA	NA;0.007;0.007;0.007;0.007;0.007;0.007;0.007;0.007	0.007	NA;tolerated_low_confidence;deleterious_low_confidence;tolerated;tolerated_low_confidence;tolerated_low_confidence;tolerated_low_confidence;deleterious_low_confidence;tolerated	deleterious_low_confidence	NA;possibly_damaging;benign;possibly_damaging;possibly_damaging;possibly_damaging;benign;benign;benign	possibly_damaging	intron_variant;missense_variant&NMD_transcript_variant;missense_variant;missense_variant&NMD_transcript_variant;missense_variant&NMD_transcript_variant;missense_variant&NMD_transcript_variant;missense_variant&NMD_transcript_variant;missense_variant&NMD_transcript_variant;missense_variant&NMD_transcript_variant	3	195784864	G	T	8.70954e-06	1	172225	ADD	3.54794	1.35655	6.84046	2.05004	NA	UC
3:195785441:T:C	3	195785441	T	C	MUC4	intron_variant;missense_variant&NMD_transcript_variant;missense_variant;missense_variant&NMD_transcript_variant;missense_variant;missense_variant&NMD_transcript_variant;missense_variant&NMD_transcript_variant;missense_variant&NMD_transcript_variant	missense_variant	moderate	coding_sequence_variant	NA	NA	NA	NA;0.076;0.076;0.076;0.076;0.076;0.076;0.076	0.076	NA;tolerated;deleterious_low_confidence;tolerated;deleterious_low_confidence;tolerated;deleterious_low_confidence;tolerated	deleterious_low_confidence	NA;benign;benign;unknown;benign;benign;benign;benign	benign	intron_variant;missense_variant&NMD_transcript_variant;missense_variant;missense_variant&NMD_transcript_variant;missense_variant;missense_variant&NMD_transcript_variant;missense_variant&NMD_transcript_variant;missense_variant&NMD_transcript_variant	3	195785441	T	C	0.000104675	1	171961	ADD	1.95584	0.758585	6.64753	2.00308	NA	CD
3:195785465:A:G	3	195785465	A	G	MUC4	intron_variant;missense_variant&NMD_transcript_variant;missense_variant;missense_variant&NMD_transcript_variant;missense_variant&NMD_transcript_variant;missense_variant&NMD_transcript_variant;missense_variant&NMD_transcript_variant	missense_variant	moderate	coding_sequence_variant	NA	NA	NA	NA;0.035;0.035;0.035;0.035;0.035;0.035	0.035	NA;deleterious;deleterious_low_confidence;tolerated;deleterious_low_confidence;deleterious_low_confidence;deleterious	deleterious	NA;possibly_damaging;benign;unknown;benign;benign;benign	possibly_damaging	intron_variant;missense_variant&NMD_transcript_variant;missense_variant;missense_variant&NMD_transcript_variant;missense_variant&NMD_transcript_variant;missense_variant&NMD_transcript_variant;missense_variant&NMD_transcript_variant	3	195785465	A	G	4.09577e-05	1	170908	ADD	2.26223	0.801462	7.96726	2.32211	NA	UC
3:195785597:T:C	3	195785597	T	C	MUC4	intron_variant;missense_variant&NMD_transcript_variant;missense_variant;missense_variant&NMD_transcript_variant;missense_variant&NMD_transcript_variant;missense_variant;missense_variant&NMD_transcript_variant;missense_variant&NMD_transcript_variant;missense_variant&NMD_transcript_variant;missense_variant&NMD_transcript_variant	missense_variant	moderate	coding_sequence_variant	NA	NA	NA	NA;0.008;0.008;0.008;0.008;0.008;0.008;0.008;0.008;0.008	0.008	NA;tolerated;tolerated_low_confidence;tolerated;tolerated;tolerated_low_confidence;tolerated;tolerated_low_confidence;tolerated_low_confidence;tolerated	tolerated_low_confidence	NA;benign;possibly_damaging;unknown;benign;possibly_damaging;benign;benign;possibly_damaging;possibly_damaging	possibly_damaging	intron_variant;missense_variant&NMD_transcript_variant;missense_variant;missense_variant&NMD_transcript_variant;missense_variant&NMD_transcript_variant;missense_variant;missense_variant&NMD_transcript_variant;missense_variant&NMD_transcript_variant;missense_variant&NMD_transcript_variant;missense_variant&NMD_transcript_variant	3	195785597	T	C	8.71004e-06	1	172215	ADD	4.26093	1.42108	8.99025	2.56635	NA	UC
3:195785848:G:C	3	195785848	G	C	MUC4	intron_variant;missense_variant&NMD_transcript_variant;missense_variant;missense_variant&NMD_transcript_variant;missense_variant&NMD_transcript_variant;missense_variant&NMD_transcript_variant	missense_variant	moderate	coding_sequence_variant	NA	NA	NA	NA;0.086;0.086;0.086;0.086;0.086	0.086	NA;deleterious_low_confidence;deleterious_low_confidence;deleterious;deleterious_low_confidence;deleterious	deleterious	NA;possibly_damaging;possibly_damaging;possibly_damaging;possibly_damaging;possibly_damaging	possibly_damaging	intron_variant;missense_variant&NMD_transcript_variant;missense_variant;missense_variant&NMD_transcript_variant;missense_variant&NMD_transcript_variant;missense_variant&NMD_transcript_variant	3	195785848	G	C	8.70959e-06	1	172224	ADD	4.1862	1.47333	8.0731	2.34749	NA	UC
3:195786001:G:A	3	195786001	G	A	MUC4	intron_variant;missense_variant&NMD_transcript_variant;missense_variant;missense_variant&NMD_transcript_variant;missense_variant&NMD_transcript_variant;missense_variant&NMD_transcript_variant;missense_variant&NMD_transcript_variant	missense_variant	moderate	coding_sequence_variant	NA	NA	NA	NA;0.112;0.112;0.112;0.112;0.112;0.112	0.112	NA;deleterious_low_confidence;deleterious_low_confidence;deleterious_low_confidence;deleterious_low_confidence;deleterious_low_confidence;deleterious	deleterious	NA;possibly_damaging;possibly_damaging;possibly_damaging;possibly_damaging;possibly_damaging;possibly_damaging	possibly_damaging	intron_variant;missense_variant&NMD_transcript_variant;missense_variant;missense_variant&NMD_transcript_variant;missense_variant&NMD_transcript_variant;missense_variant&NMD_transcript_variant;missense_variant&NMD_transcript_variant	3	195786001	G	A	3.48384e-05	1	172224	ADD	3.29081	0.858729	14.6856	3.89615	NA	UC
3:195786188:C:T	3	195786188	C	T	MUC4	intron_variant;missense_variant&NMD_transcript_variant;missense_variant;missense_variant&NMD_transcript_variant;missense_variant;missense_variant&NMD_transcript_variant;missense_variant&NMD_transcript_variant;missense_variant&NMD_transcript_variant;missense_variant&NMD_transcript_variant	missense_variant	moderate	coding_sequence_variant	NA	NA	NA	NA;0.016;0.016;0.016;0.016;0.016;0.016;0.016;0.016	0.016	NA;tolerated_low_confidence;tolerated_low_confidence;tolerated;tolerated_low_confidence;tolerated_low_confidence;tolerated_low_confidence;tolerated_low_confidence;tolerated	tolerated_low_confidence	NA;benign;benign;benign;benign;benign;benign;benign;benign	benign	intron_variant;missense_variant&NMD_transcript_variant;missense_variant;missense_variant&NMD_transcript_variant;missense_variant;missense_variant&NMD_transcript_variant;missense_variant&NMD_transcript_variant;missense_variant&NMD_transcript_variant;missense_variant&NMD_transcript_variant	3	195786188	C	T	1.74191e-05	1	172225	ADD	4.65043	1.44202	10.4003	2.89965	NA	CD
3:195786392:G:C	3	195786392	G	C	MUC4	intron_variant;missense_variant&NMD_transcript_variant;missense_variant;missense_variant&NMD_transcript_variant;missense_variant;missense_variant&NMD_transcript_variant;missense_variant&NMD_transcript_variant;missense_variant&NMD_transcript_variant	missense_variant	moderate	coding_sequence_variant	NA	NA	NA	NA;0.029;0.029;0.029;0.029;0.029;0.029;0.029	0.029	NA;tolerated_low_confidence;deleterious_low_confidence;tolerated;tolerated_low_confidence;deleterious_low_confidence;deleterious_low_confidence;tolerated	deleterious_low_confidence	NA;possibly_damaging;possibly_damaging;possibly_damaging;possibly_damaging;possibly_damaging;possibly_damaging;possibly_damaging	possibly_damaging	intron_variant;missense_variant&NMD_transcript_variant;missense_variant;missense_variant&NMD_transcript_variant;missense_variant;missense_variant&NMD_transcript_variant;missense_variant&NMD_transcript_variant;missense_variant&NMD_transcript_variant	3	195786392	G	C	2.32497e-05	1	172045	ADD	2.10578	0.793288	7.04637	2.10004	NA	UC
3:195786396:A:G	3	195786396	A	G	MUC4	intron_variant;synonymous_variant&NMD_transcript_variant;synonymous_variant	synonymous_variant	low	coding_sequence_variant	NA	NA	NA	NA	NA	NA	NA	NA	NA	intron_variant;synonymous_variant&NMD_transcript_variant;synonymous_variant	3	195786396	A	G	8.7187e-06	1	172044	ADD	4.65255	1.47901	9.89558	2.78074	NA	CD
3:195786496:G:A	3	195786496	G	A	MUC4	intron_variant;missense_variant&NMD_transcript_variant;missense_variant;missense_variant&NMD_transcript_variant;missense_variant&NMD_transcript_variant;missense_variant&NMD_transcript_variant;missense_variant&NMD_transcript_variant	missense_variant	moderate	coding_sequence_variant	NA	NA	NA	NA;0.068;0.068;0.068;0.068;0.068;0.068	0.068	NA;deleterious_low_confidence;deleterious_low_confidence;deleterious;deleterious;deleterious_low_confidence;deleterious	deleterious	NA;possibly_damaging;possibly_damaging;possibly_damaging;possibly_damaging;possibly_damaging;possibly_damaging	possibly_damaging	intron_variant;missense_variant&NMD_transcript_variant;missense_variant;missense_variant&NMD_transcript_variant;missense_variant&NMD_transcript_variant;missense_variant&NMD_transcript_variant;missense_variant&NMD_transcript_variant	3	195786496	G	A	4.37305e-05	1	171505	ADD	2.21147	0.791281	7.81087	2.28456	NA	UC
3:195786687:G:T	3	195786687	G	T	MUC4	intron_variant;synonymous_variant&NMD_transcript_variant;synonymous_variant	synonymous_variant	low	coding_sequence_variant	NA	NA	NA	NA	NA	NA	NA	NA	NA	intron_variant;synonymous_variant&NMD_transcript_variant;synonymous_variant	3	195786687	G	T	7.84373e-05	1	172112	ADD	2.56866	0.837921	9.39736	2.66295	NA	CD
3:195786728:G:C	3	195786728	G	C	MUC4	intron_variant;missense_variant&NMD_transcript_variant;missense_variant;missense_variant&NMD_transcript_variant;missense_variant&NMD_transcript_variant;missense_variant;missense_variant&NMD_transcript_variant;missense_variant&NMD_transcript_variant;missense_variant&NMD_transcript_variant;missense_variant&NMD_transcript_variant	missense_variant	moderate	coding_sequence_variant	NA	NA	NA	NA;0.027;0.027;0.027;0.027;0.027;0.027;0.027;0.027;0.027	0.027	NA;tolerated_low_confidence;deleterious_low_confidence;tolerated;tolerated_low_confidence;tolerated_low_confidence;tolerated_low_confidence;tolerated_low_confidence;tolerated_low_confidence;tolerated_low_confidence	deleterious_low_confidence	NA;possibly_damaging;possibly_damaging;benign;possibly_damaging;possibly_damaging;probably_damaging;possibly_damaging;possibly_damaging;possibly_damaging	probably_damaging	intron_variant;missense_variant&NMD_transcript_variant;missense_variant;missense_variant&NMD_transcript_variant;missense_variant&NMD_transcript_variant;missense_variant;missense_variant&NMD_transcript_variant;missense_variant&NMD_transcript_variant;missense_variant&NMD_transcript_variant;missense_variant&NMD_transcript_variant	3	195786728	G	C	6.68073e-05	1	172137	ADD	2.58195	0.938386	7.57065	2.22675	NA	CD
3:195788357:C:T	3	195788357	C	T	MUC4	intron_variant;missense_variant&NMD_transcript_variant;missense_variant;missense_variant&NMD_transcript_variant;missense_variant&NMD_transcript_variant;missense_variant;missense_variant&NMD_transcript_variant;missense_variant&NMD_transcript_variant;missense_variant&NMD_transcript_variant	missense_variant	moderate	coding_sequence_variant	NA	NA	NA	NA;0.003;0.003;0.003;0.003;0.003;0.003;0.003;0.003	0.003	NA;tolerated_low_confidence;tolerated_low_confidence;tolerated;tolerated_low_confidence;tolerated_low_confidence;tolerated_low_confidence;tolerated_low_confidence;tolerated_low_confidence	tolerated_low_confidence	NA;benign;possibly_damaging;benign;benign;benign;benign;benign;possibly_damaging	possibly_damaging	intron_variant;missense_variant&NMD_transcript_variant;missense_variant;missense_variant&NMD_transcript_variant;missense_variant&NMD_transcript_variant;missense_variant;missense_variant&NMD_transcript_variant;missense_variant&NMD_transcript_variant;missense_variant&NMD_transcript_variant	3	195788357	C	T	1.16129e-05	1	172223	ADD	3.71429	1.354	7.52519	2.2158	NA	UC
3:195788389:G:T	3	195788389	G	T	MUC4	intron_variant;stop_gained&NMD_transcript_variant;stop_gained	stop_gained	high	feature_truncation	highConf	NA	NA	NA	NA	NA	NA	NA	NA	intron_variant;stop_gained&NMD_transcript_variant;stop_gained	3	195788389	G	T	8.70964e-06	1	172223	ADD	4.05602	1.4184	8.1771	2.3724	NA	UC
3:195788413:G:T	3	195788413	G	T	MUC4	intron_variant;missense_variant&NMD_transcript_variant;missense_variant;missense_variant&NMD_transcript_variant;missense_variant&NMD_transcript_variant;missense_variant&NMD_transcript_variant;missense_variant&NMD_transcript_variant;missense_variant&NMD_transcript_variant	missense_variant	moderate	coding_sequence_variant	NA	NA	NA	NA;0.064;0.064;0.064;0.064;0.064;0.064;0.064	0.064	NA;tolerated_low_confidence;deleterious_low_confidence;deleterious;tolerated_low_confidence;deleterious_low_confidence;deleterious_low_confidence;tolerated_low_confidence	deleterious	NA;probably_damaging;possibly_damaging;probably_damaging;probably_damaging;possibly_damaging;possibly_damaging;possibly_damaging	probably_damaging	intron_variant;missense_variant&NMD_transcript_variant;missense_variant;missense_variant&NMD_transcript_variant;missense_variant&NMD_transcript_variant;missense_variant&NMD_transcript_variant;missense_variant&NMD_transcript_variant;missense_variant&NMD_transcript_variant	3	195788413	G	T	2.03224e-05	1	172224	ADD	3.90839	1.36623	8.18368	2.37398	NA	CD
3:195788424:A:T	3	195788424	A	T	MUC4	intron_variant;synonymous_variant&NMD_transcript_variant;synonymous_variant	synonymous_variant	low	coding_sequence_variant	NA	NA	NA	NA	NA	NA	NA	NA	NA	intron_variant;synonymous_variant&NMD_transcript_variant;synonymous_variant	3	195788424	A	T	0.0002729	1	172224	ADD	1.75242	0.560199	9.78571	2.7548	NA	UC
3:195788485:G:T	3	195788485	G	T	MUC4	intron_variant;stop_gained&NMD_transcript_variant;stop_gained	stop_gained	high	feature_truncation	highConf	NA	NA	NA	NA	NA	NA	NA	NA	intron_variant;stop_gained&NMD_transcript_variant;stop_gained	3	195788485	G	T	8.70954e-06	1	172225	ADD	4.24134	1.41206	9.02199	2.57389	NA	CD
3:195788629:G:A	3	195788629	G	A	MUC4	intron_variant;missense_variant&NMD_transcript_variant;missense_variant;missense_variant&NMD_transcript_variant;missense_variant&NMD_transcript_variant;missense_variant&NMD_transcript_variant;missense_variant&NMD_transcript_variant	missense_variant	moderate	coding_sequence_variant	NA	NA	NA	NA;0.083;0.083;0.083;0.083;0.083;0.083	0.083	NA;deleterious_low_confidence;deleterious_low_confidence;deleterious_low_confidence;deleterious_low_confidence;deleterious_low_confidence;deleterious_low_confidence	deleterious_low_confidence	NA;possibly_damaging;benign;possibly_damaging;benign;benign;benign	possibly_damaging	intron_variant;missense_variant&NMD_transcript_variant;missense_variant;missense_variant&NMD_transcript_variant;missense_variant&NMD_transcript_variant;missense_variant&NMD_transcript_variant;missense_variant&NMD_transcript_variant	3	195788629	G	A	2.90318e-05	1	172225	ADD	3.52172	1.30517	7.28071	2.15677	NA	CD
3:195789016:C:G	3	195789016	C	G	MUC4	intron_variant;missense_variant&NMD_transcript_variant;missense_variant;missense_variant&NMD_transcript_variant;missense_variant&NMD_transcript_variant;missense_variant;missense_variant&NMD_transcript_variant;missense_variant&NMD_transcript_variant;missense_variant&NMD_transcript_variant;missense_variant&NMD_transcript_variant	missense_variant	moderate	coding_sequence_variant	NA	NA	NA	NA;0.021;0.021;0.021;0.021;0.021;0.021;0.021;0.021;0.021	0.021	NA;tolerated_low_confidence;tolerated_low_confidence;tolerated_low_confidence;tolerated_low_confidence;tolerated_low_confidence;tolerated_low_confidence;tolerated_low_confidence;tolerated_low_confidence;tolerated_low_confidence	tolerated_low_confidence	NA;unknown;possibly_damaging;possibly_damaging;possibly_damaging;possibly_damaging;possibly_damaging;possibly_damaging;possibly_damaging;possibly_damaging	possibly_damaging	intron_variant;missense_variant&NMD_transcript_variant;missense_variant;missense_variant&NMD_transcript_variant;missense_variant&NMD_transcript_variant;missense_variant;missense_variant&NMD_transcript_variant;missense_variant&NMD_transcript_variant;missense_variant&NMD_transcript_variant;missense_variant&NMD_transcript_variant	3	195789016	C	G	1.16127e-05	1	172225	ADD	3.96869	1.37652	8.31246	2.40479	NA	UC
3:195789134:A:T	3	195789134	A	T	MUC4	intron_variant;missense_variant&NMD_transcript_variant;missense_variant;missense_variant&NMD_transcript_variant;missense_variant&NMD_transcript_variant;missense_variant;missense_variant&NMD_transcript_variant;missense_variant&NMD_transcript_variant;missense_variant&NMD_transcript_variant;missense_variant&NMD_transcript_variant	missense_variant	moderate	coding_sequence_variant	NA	NA	NA	NA;0.018;0.018;0.018;0.018;0.018;0.018;0.018;0.018;0.018	0.018	NA;tolerated_low_confidence;deleterious_low_confidence;deleterious_low_confidence;tolerated_low_confidence;tolerated_low_confidence;tolerated_low_confidence;tolerated_low_confidence;tolerated_low_confidence;deleterious_low_confidence	deleterious_low_confidence	NA;unknown;benign;benign;benign;benign;benign;benign;benign;benign	benign	intron_variant;missense_variant&NMD_transcript_variant;missense_variant;missense_variant&NMD_transcript_variant;missense_variant&NMD_transcript_variant;missense_variant;missense_variant&NMD_transcript_variant;missense_variant&NMD_transcript_variant;missense_variant&NMD_transcript_variant;missense_variant&NMD_transcript_variant	3	195789134	A	T	2.90318e-05	1	172225	ADD	3.63337	1.33384	7.42015	2.19046	NA	CD
3:195789938:A:G	3	195789938	A	G	MUC4	intron_variant;missense_variant&NMD_transcript_variant;missense_variant;missense_variant&NMD_transcript_variant;missense_variant&NMD_transcript_variant;missense_variant;missense_variant&NMD_transcript_variant;missense_variant&NMD_transcript_variant;missense_variant&NMD_transcript_variant	missense_variant	moderate	coding_sequence_variant	NA	NA	NA	NA;0.010;0.010;0.010;0.010;0.010;0.010;0.010;0.010	0.01	NA;tolerated_low_confidence;tolerated_low_confidence;tolerated_low_confidence;tolerated_low_confidence;tolerated_low_confidence;tolerated_low_confidence;tolerated_low_confidence;tolerated_low_confidence	tolerated_low_confidence	NA;unknown;benign;possibly_damaging;possibly_damaging;benign;benign;benign;benign	possibly_damaging	intron_variant;missense_variant&NMD_transcript_variant;missense_variant;missense_variant&NMD_transcript_variant;missense_variant&NMD_transcript_variant;missense_variant;missense_variant&NMD_transcript_variant;missense_variant&NMD_transcript_variant;missense_variant&NMD_transcript_variant	3	195789938	A	G	2.03223e-05	1	172225	ADD	3.42234	1.30155	6.9139	2.06789	NA	UC
3:195790132:T:C	3	195790132	T	C	MUC4	intron_variant;missense_variant&NMD_transcript_variant;missense_variant;missense_variant&NMD_transcript_variant;missense_variant&NMD_transcript_variant;missense_variant;missense_variant&NMD_transcript_variant;missense_variant&NMD_transcript_variant;missense_variant&NMD_transcript_variant	missense_variant	moderate	coding_sequence_variant	NA	NA	NA	NA;0.016;0.016;0.016;0.016;0.016;0.016;0.016;0.016	0.016	NA;tolerated_low_confidence;tolerated_low_confidence;tolerated_low_confidence;tolerated_low_confidence;tolerated_low_confidence;tolerated_low_confidence;tolerated_low_confidence;tolerated_low_confidence	tolerated_low_confidence	NA;unknown;benign;benign;benign;benign;benign;benign;benign	benign	intron_variant;missense_variant&NMD_transcript_variant;missense_variant;missense_variant&NMD_transcript_variant;missense_variant&NMD_transcript_variant;missense_variant;missense_variant&NMD_transcript_variant;missense_variant&NMD_transcript_variant;missense_variant&NMD_transcript_variant	3	195790132	T	C	4.06445e-05	1	172225	ADD	2.95488	0.975784	9.17008	2.60906	NA	UC
3:195790205:C:T	3	195790205	C	T	MUC4	intron_variant;missense_variant&NMD_transcript_variant;missense_variant;missense_variant&NMD_transcript_variant;missense_variant&NMD_transcript_variant;missense_variant;missense_variant&NMD_transcript_variant;missense_variant&NMD_transcript_variant;missense_variant&NMD_transcript_variant;missense_variant&NMD_transcript_variant	missense_variant	moderate	coding_sequence_variant	NA	NA	NA	NA;0.007;0.007;0.007;0.007;0.007;0.007;0.007;0.007;0.007	0.007	NA;tolerated_low_confidence;tolerated_low_confidence;deleterious_low_confidence;tolerated_low_confidence;tolerated_low_confidence;tolerated_low_confidence;tolerated_low_confidence;tolerated_low_confidence;deleterious_low_confidence	deleterious_low_confidence	NA;unknown;possibly_damaging;possibly_damaging;possibly_damaging;possibly_damaging;possibly_damaging;possibly_damaging;possibly_damaging;possibly_damaging	possibly_damaging	intron_variant;missense_variant&NMD_transcript_variant;missense_variant;missense_variant&NMD_transcript_variant;missense_variant&NMD_transcript_variant;missense_variant;missense_variant&NMD_transcript_variant;missense_variant&NMD_transcript_variant;missense_variant&NMD_transcript_variant;missense_variant&NMD_transcript_variant	3	195790205	C	T	8.70954e-06	1	172225	ADD	4.28831	1.42853	9.01144	2.57139	NA	UC
3:195791042:G:A	3	195791042	G	A	MUC4	intron_variant;stop_gained&NMD_transcript_variant;stop_gained	stop_gained	high	feature_truncation	highConf	NA	NA	NA	NA	NA	NA	NA	NA	intron_variant;stop_gained&NMD_transcript_variant;stop_gained	3	195791042	G	A	8.70954e-06	1	172225	ADD	4.58872	1.17963	15.1318	3.99886	NA	UC
3:195791042:G:A	3	195791042	G	A	MUC4	intron_variant;stop_gained&NMD_transcript_variant;stop_gained	stop_gained	high	feature_truncation	highConf	NA	NA	NA	NA	NA	NA	NA	NA	intron_variant;stop_gained&NMD_transcript_variant;stop_gained	3	195791042	G	A	8.70954e-06	1	172225	ADD	5.05074	1.21977	17.1455	4.46064	NA	CD
3:195798872:G:C	3	195798872	G	C	MUC4	intron_variant;intron_variant&NMD_transcript_variant	intron_variant	modifier	intron_variant	NA	NA	NA	NA	NA	NA	NA	NA	NA	intron_variant;intron_variant&NMD_transcript_variant	3	195798872	G	C	1.45159e-05	1	172225	ADD	3.57391	1.32989	7.22204	2.14258	NA	CD
3:195800919:T:C	3	195800919	T	C	MUC4	intron_variant;intron_variant&NMD_transcript_variant	intron_variant	modifier	intron_variant	NA	NA	NA	NA	NA	NA	NA	NA	NA	intron_variant;intron_variant&NMD_transcript_variant	3	195800919	T	C	8.70954e-06	1	172225	ADD	4.64393	1.49692	9.62447	2.71669	NA	CD
3:195801042:C:CA	3	195801042	C	CA	MUC4	intron_variant;intron_variant&NMD_transcript_variant	intron_variant	modifier	intron_variant	NA	NA	NA	NA	NA	NA	NA	NA	NA	intron_variant;intron_variant&NMD_transcript_variant	3	195801042	C	CA	8.70954e-06	1	172225	ADD	3.59104	1.38055	6.76607	2.03195	NA	CD
3:195801144:C:T	3	195801144	C	T	MUC4	intron_variant;intron_variant&NMD_transcript_variant	intron_variant	modifier	intron_variant	NA	NA	NA	NA	NA	NA	NA	NA	NA	intron_variant;intron_variant&NMD_transcript_variant	3	195801144	C	T	1.16127e-05	1	172225	ADD	3.917	1.37813	8.07842	2.34877	NA	UC
3:195801326:G:T	3	195801326	G	T	MUC4	intron_variant;intron_variant&NMD_transcript_variant	intron_variant	modifier	intron_variant	NA	NA	NA	NA	NA	NA	NA	NA	NA	intron_variant;intron_variant&NMD_transcript_variant	3	195801326	G	T	2.03223e-05	1	172225	ADD	3.51161	1.05452	11.0893	3.06134	NA	UC
3:195801810:GC:G	3	195801810	GC	G	MUC4	intron_variant;intron_variant&NMD_transcript_variant	intron_variant	modifier	intron_variant	NA	NA	NA	NA	NA	NA	NA	NA	NA	intron_variant;intron_variant&NMD_transcript_variant	3	195801810	GC	G	8.41922e-05	1	172225	ADD	2.71983	0.925222	8.64157	2.48336	NA	CD
3:195801915:C:A	3	195801915	C	A	MUC4	intron_variant;intron_variant&NMD_transcript_variant	intron_variant	modifier	intron_variant	NA	NA	NA	NA	NA	NA	NA	NA	NA	intron_variant;intron_variant&NMD_transcript_variant	3	195801915	C	A	2.61286e-05	1	172225	ADD	4.22672	1.38354	9.33306	2.64771	NA	CD
3:195802585:G:A	3	195802585	G	A	MUC4	intron_variant;intron_variant&NMD_transcript_variant	intron_variant	modifier	intron_variant	NA	NA	NA	NA	NA	NA	NA	NA	NA	intron_variant;intron_variant&NMD_transcript_variant	3	195802585	G	A	3.1935e-05	1	172225	ADD	3.28227	1.27356	6.64217	2.00177	NA	UC
3:195802800:G:A	3	195802800	G	A	MUC4	intron_variant;intron_variant&NMD_transcript_variant	intron_variant	modifier	intron_variant	NA	NA	NA	NA	NA	NA	NA	NA	NA	intron_variant;intron_variant&NMD_transcript_variant	3	195802800	G	A	1.74191e-05	1	172225	ADD	4.02082	1.37446	8.55782	2.46339	NA	CD
3:195802805:T:C	3	195802805	T	C	MUC4	intron_variant;intron_variant&NMD_transcript_variant	intron_variant	modifier	intron_variant	NA	NA	NA	NA	NA	NA	NA	NA	NA	intron_variant;intron_variant&NMD_transcript_variant	3	195802805	T	C	0.00031935	1	172225	ADD	1.64375	0.509527	10.4073	2.9013	NA	UC
3:195804051:G:A	3	195804051	G	A	MUC4	intron_variant;intron_variant&NMD_transcript_variant	intron_variant	modifier	intron_variant	NA	NA	NA	NA	NA	NA	NA	NA	NA	intron_variant;intron_variant&NMD_transcript_variant	3	195804051	G	A	1.16127e-05	1	172225	ADD	4.06061	1.3835	8.61442	2.47689	NA	UC
3:195804352:T:C	3	195804352	T	C	MUC4	intron_variant;intron_variant&NMD_transcript_variant	intron_variant	modifier	intron_variant	NA	NA	NA	NA	NA	NA	NA	NA	NA	intron_variant;intron_variant&NMD_transcript_variant	3	195804352	T	C	1.16127e-05	1	172225	ADD	3.56022	1.33395	7.12321	2.11866	NA	UC
3:195804616:G:A	3	195804616	G	A	MUC4	intron_variant;intron_variant&NMD_transcript_variant	intron_variant	modifier	intron_variant	NA	NA	NA	NA	NA	NA	NA	NA	NA	intron_variant;intron_variant&NMD_transcript_variant	3	195804616	G	A	1.16127e-05	1	172225	ADD	3.57647	1.35981	6.91758	2.06878	NA	UC
3:195804756:C:T	3	195804756	C	T	MUC4	intron_variant;intron_variant&NMD_transcript_variant;downstream_gene_variant	intron_variant	modifier	intron_variant	NA	NA	NA	NA	NA	NA	NA	NA	NA	intron_variant;intron_variant&NMD_transcript_variant;downstream_gene_variant	3	195804756	C	T	2.90318e-05	1	172225	ADD	3.46993	1.29358	7.19541	2.13614	NA	CD
3:195804818:G:A	3	195804818	G	A	MUC4	intron_variant;intron_variant&NMD_transcript_variant;downstream_gene_variant	intron_variant	modifier	intron_variant	NA	NA	NA	NA	NA	NA	NA	NA	NA	intron_variant;intron_variant&NMD_transcript_variant;downstream_gene_variant	3	195804818	G	A	8.70954e-06	1	172225	ADD	3.91562	1.40463	7.77099	2.27497	NA	UC
3:195805186:C:T	3	195805186	C	T	MUC4	intron_variant;intron_variant&NMD_transcript_variant;downstream_gene_variant	intron_variant	modifier	intron_variant	NA	NA	NA	NA	NA	NA	NA	NA	NA	intron_variant;intron_variant&NMD_transcript_variant;downstream_gene_variant	3	195805186	C	T	2.32254e-05	1	172225	ADD	3.69401	1.32148	7.81401	2.28531	NA	CD
3:195806675:G:A	3	195806675	G	A	MUC4	intron_variant;intron_variant&NMD_transcript_variant;downstream_gene_variant	intron_variant	modifier	intron_variant	NA	NA	NA	NA	NA	NA	NA	NA	NA	intron_variant;intron_variant&NMD_transcript_variant;downstream_gene_variant	3	195806675	G	A	1.74191e-05	1	172225	ADD	3.73474	1.35876	7.55503	2.22299	NA	CD
3:195807654:A:C	3	195807654	A	C	MUC4	intron_variant;intron_variant&NMD_transcript_variant;downstream_gene_variant	intron_variant	modifier	intron_variant	NA	NA	NA	NA	NA	NA	NA	NA	NA	intron_variant;intron_variant&NMD_transcript_variant;downstream_gene_variant	3	195807654	A	C	2.90318e-05	1	172225	ADD	4.00687	1.352	8.78333	2.51713	NA	CD
3:195809075:C:T	3	195809075	C	T	MUC4	intron_variant;intron_variant&NMD_transcript_variant;downstream_gene_variant	intron_variant	modifier	intron_variant	NA	NA	NA	NA	NA	NA	NA	NA	NA	intron_variant;intron_variant&NMD_transcript_variant;downstream_gene_variant	3	195809075	C	T	2.03223e-05	1	172225	ADD	3.67153	1.34713	7.428	2.19235	NA	CD
3:195809816:G:A	3	195809816	G	A	MUC4	intron_variant;intron_variant&NMD_transcript_variant;non_coding_transcript_exon_variant	non_coding_transcript_exon_variant	modifier	non_coding_transcript_variant	NA	NA	NA	NA	NA	NA	NA	NA	NA	intron_variant;intron_variant&NMD_transcript_variant;non_coding_transcript_exon_variant	3	195809816	G	A	1.74191e-05	1	172225	ADD	3.52169	1.06425	10.9501	3.02872	NA	UC
3:195809829:A:G	3	195809829	A	G	MUC4	intron_variant;intron_variant&NMD_transcript_variant;non_coding_transcript_exon_variant	non_coding_transcript_exon_variant	modifier	non_coding_transcript_variant	NA	NA	NA	NA	NA	NA	NA	NA	NA	intron_variant;intron_variant&NMD_transcript_variant;non_coding_transcript_exon_variant	3	195809829	A	G	8.70954e-06	1	172225	ADD	4.22481	1.46075	8.36491	2.41733	NA	UC
3:195809964:G:A	3	195809964	G	A	MUC4	intron_variant;intron_variant&NMD_transcript_variant;non_coding_transcript_exon_variant	non_coding_transcript_exon_variant	modifier	non_coding_transcript_variant	NA	NA	NA	NA	NA	NA	NA	NA	NA	intron_variant;intron_variant&NMD_transcript_variant;non_coding_transcript_exon_variant	3	195809964	G	A	1.45159e-05	1	172225	ADD	3.59781	1.33205	7.29523	2.16028	NA	CD
3:195809964:G:A	3	195809964	G	A	MUC4	intron_variant;intron_variant&NMD_transcript_variant;non_coding_transcript_exon_variant	non_coding_transcript_exon_variant	modifier	non_coding_transcript_variant	NA	NA	NA	NA	NA	NA	NA	NA	NA	intron_variant;intron_variant&NMD_transcript_variant;non_coding_transcript_exon_variant	3	195809964	G	A	1.45159e-05	1	172225	ADD	4.14331	1.46205	8.03105	2.33741	NA	UC
3:195810245:C:T	3	195810245	C	T	MUC4	intron_variant;intron_variant&NMD_transcript_variant;non_coding_transcript_exon_variant	non_coding_transcript_exon_variant	modifier	non_coding_transcript_variant	NA	NA	NA	NA	NA	NA	NA	NA	NA	intron_variant;intron_variant&NMD_transcript_variant;non_coding_transcript_exon_variant	3	195810245	C	T	1.45159e-05	1	172225	ADD	3.87713	1.35699	8.16338	2.36912	NA	UC
3:195810381:C:T	3	195810381	C	T	MUC4	intron_variant;intron_variant&NMD_transcript_variant;intron_variant&non_coding_transcript_variant	intron_variant	modifier	intron_variant	NA	NA	NA	NA	NA	NA	NA	NA	NA	intron_variant;intron_variant&NMD_transcript_variant;intron_variant&non_coding_transcript_variant	3	195810381	C	T	0.000238061	1	172225	ADD	1.81649	0.625793	8.42569	2.43185	NA	UC
3:195810614:C:T	3	195810614	C	T	MUC4	intron_variant;intron_variant&NMD_transcript_variant;intron_variant&non_coding_transcript_variant	intron_variant	modifier	intron_variant	NA	NA	NA	NA	NA	NA	NA	NA	NA	intron_variant;intron_variant&NMD_transcript_variant;intron_variant&non_coding_transcript_variant	3	195810614	C	T	6.67731e-05	1	172225	ADD	2.88588	0.947267	9.28134	2.63545	NA	CD
3:195810745:C:T	3	195810745	C	T	MUC4	intron_variant;intron_variant&NMD_transcript_variant;intron_variant&non_coding_transcript_variant	intron_variant	modifier	intron_variant	NA	NA	NA	NA	NA	NA	NA	NA	NA	intron_variant;intron_variant&NMD_transcript_variant;intron_variant&non_coding_transcript_variant	3	195810745	C	T	1.74191e-05	1	172225	ADD	3.53733	1.32609	7.11555	2.1168	NA	UC
3:195811823:C:T	3	195811823	C	T	MUC4	5_prime_UTR_variant;5_prime_UTR_variant&NMD_transcript_variant;non_coding_transcript_exon_variant	5_prime_UTR_variant	modifier	UTR_variant	NA	NA	NA	NA	NA	NA	NA	NA	NA	5_prime_UTR_variant;5_prime_UTR_variant&NMD_transcript_variant;non_coding_transcript_exon_variant	3	195811823	C	T	2.61286e-05	1	172225	ADD	3.37858	1.30203	6.73326	2.02396	NA	CD
3:195812377:G:A	3	195812377	G	A	MUC4	upstream_gene_variant	upstream_gene_variant	modifier	intergenic_variant	NA	NA	NA	NA	NA	NA	NA	NA	NA	upstream_gene_variant	3	195812377	G	A	2.61286e-05	1	172225	ADD	3.59268	1.30852	7.53836	2.21897	NA	CD
3:195812595:G:A	3	195812595	G	A	MUC4	upstream_gene_variant	upstream_gene_variant	modifier	intergenic_variant	NA	NA	NA	NA	NA	NA	NA	NA	NA	upstream_gene_variant	3	195812595	G	A	1.16127e-05	1	172225	ADD	4.47292	1.4587	9.40269	2.66421	NA	CD
3:195812916:A:G	3	195812916	A	G	MUC4	upstream_gene_variant	upstream_gene_variant	modifier	intergenic_variant	NA	NA	NA	NA	NA	NA	NA	NA	NA	upstream_gene_variant	3	195812916	A	G	1.16127e-05	1	172225	ADD	3.72272	1.35797	7.51521	2.21339	NA	UC
3:195813194:AGGCAACC:A	3	195813194	AGGCAACC	A	MUC4	upstream_gene_variant	upstream_gene_variant	modifier	intergenic_variant	NA	NA	NA	NA	NA	NA	NA	NA	NA	upstream_gene_variant	3	195813194	AGGCAACC	A	1.45159e-05	1	172225	ADD	3.71915	1.35616	7.52083	2.21474	NA	UC
3:195813419:A:G	3	195813419	A	G	MUC4	upstream_gene_variant	upstream_gene_variant	modifier	intergenic_variant	NA	NA	NA	NA	NA	NA	NA	NA	NA	upstream_gene_variant	3	195813419	A	G	1.16127e-05	1	172225	ADD	4.72949	1.48843	10.0966	2.82814	NA	CD
3:195813963:G:A	3	195813963	G	A	MUC4	upstream_gene_variant	upstream_gene_variant	modifier	intergenic_variant	NA	NA	NA	NA	NA	NA	NA	NA	NA	upstream_gene_variant	3	195813963	G	A	1.45159e-05	1	172225	ADD	3.44966	1.30612	6.97562	2.08288	NA	UC
3:195814582:G:T	3	195814582	G	T	MUC4	upstream_gene_variant	upstream_gene_variant	modifier	intergenic_variant	NA	NA	NA	NA	NA	NA	NA	NA	NA	upstream_gene_variant	3	195814582	G	T	1.16127e-05	1	172225	ADD	3.4218	1.3177	6.7433	2.02641	NA	CD
3:195814923:G:A	3	195814923	G	A	MUC4	upstream_gene_variant	upstream_gene_variant	modifier	intergenic_variant	NA	NA	NA	NA	NA	NA	NA	NA	NA	upstream_gene_variant	3	195814923	G	A	8.70954e-06	1	172225	ADD	4.37649	1.43702	9.27531	2.63402	NA	CD
3:195815417:A:G	3	195815417	A	G	MUC4	upstream_gene_variant	upstream_gene_variant	modifier	intergenic_variant	NA	NA	NA	NA	NA	NA	NA	NA	NA	upstream_gene_variant	3	195815417	A	G	8.70954e-06	1	172225	ADD	4.36915	1.50632	8.41321	2.42887	NA	CD
