# Supplementary material for: Genetic and dietary modulators of the inflammatory response in the gastrointestinal tract of the BXD mouse genetic reference population
Source: eLife. 2023 Oct 19;12:RP87569. doi: 10.7554/eLife.87569 (PMC10586803; doi:10.7554/eLife.87569)
Supplement: Supplementary file 5. — Related to Figure 5 [file elife-87569-supp5.xlsx]

## Sheet: Epha6 (Mouse)
Path_id	Path_name	Score	Known connection	Gene	Species
GO:0005452	inorganic anion exchanger activity	0.61	No	Epha6	Mus musculus
GO:0031674	I band	0.505	No	Epha6	Mus musculus
GO:0030016	myofibril	0.496	No	Epha6	Mus musculus
GO:0030017	sarcomere	0.485	No	Epha6	Mus musculus
GO:0043292	contractile fiber	0.481	No	Epha6	Mus musculus
GO:0030018	Z disc	0.476	No	Epha6	Mus musculus
GO:0044449	contractile fiber part	0.475	No	Epha6	Mus musculus
GO:0031623	receptor internalization	0.462	No	Epha6	Mus musculus
GO:0032635	interleukin-6 production	0.456	No	Epha6	Mus musculus
GO:1990266	neutrophil migration	0.447	No	Epha6	Mus musculus
GO:0097530	granulocyte migration	0.444	No	Epha6	Mus musculus
GO:0032675	regulation of interleukin-6 production	0.442	No	Epha6	Mus musculus
GO:0050911	detection of chemical stimulus involved in sensory perception of smell	0.441	No	Epha6	Mus musculus
GO:0030593	neutrophil chemotaxis	0.435	No	Epha6	Mus musculus
GO:0035240	dopamine binding	0.432	No	Epha6	Mus musculus
GO:0071621	granulocyte chemotaxis	0.43	No	Epha6	Mus musculus
GO:0006898	receptor-mediated endocytosis	0.423	No	Epha6	Mus musculus
GO:0005550	pheromone binding	0.423	No	Epha6	Mus musculus
GO:0019236	response to pheromone	0.42	No	Epha6	Mus musculus
GO:0016503	pheromone receptor activity	0.417	No	Epha6	Mus musculus
GO:0055001	muscle cell development	0.415	No	Epha6	Mus musculus
GO:0042734	presynaptic membrane	0.413	No	Epha6	Mus musculus
GO:0097529	myeloid leukocyte migration	0.409	No	Epha6	Mus musculus
GO:0050900	leukocyte migration	0.406	No	Epha6	Mus musculus
5140	Leishmaniasis	0.406	No	Epha6	Mus musculus
GO:0050727	regulation of inflammatory response	0.405	No	Epha6	Mus musculus
4080	Neuroactive ligand-receptor interaction	0.403	No	Epha6	Mus musculus
GO:0098802	plasma membrane receptor complex	0.401	No	Epha6	Mus musculus
GO:0044456	synapse part	0.401	No	Epha6	Mus musculus
GO:0006954	inflammatory response	0.401	No	Epha6	Mus musculus
GO:0030595	leukocyte chemotaxis	0.397	No	Epha6	Mus musculus
GO:0048588	developmental cell growth	0.395	No	Epha6	Mus musculus
GO:0098815	modulation of excitatory postsynaptic potential	0.393	No	Epha6	Mus musculus
R-MMU-6783589	Interleukin-6 family signaling	0.391	No	Epha6	Mus musculus
GO:1990138	neuron projection extension	0.39	No	Epha6	Mus musculus
GO:0060079	excitatory postsynaptic potential	0.39	No	Epha6	Mus musculus
GO:0050806	positive regulation of synaptic transmission	0.388	No	Epha6	Mus musculus
GO:0005549	odorant binding	0.384	No	Epha6	Mus musculus
GO:0007229	integrin-mediated signaling pathway	0.382	No	Epha6	Mus musculus
GO:0051968	positive regulation of synaptic transmission, glutamatergic	0.381	No	Epha6	Mus musculus
GO:0044306	neuron projection terminus	0.381	No	Epha6	Mus musculus
GO:0002685	regulation of leukocyte migration	0.379	No	Epha6	Mus musculus
GO:0097060	synaptic membrane	0.378	No	Epha6	Mus musculus
5150	Staphylococcus aureus infection	0.378	No	Epha6	Mus musculus
GO:1902622	regulation of neutrophil migration	0.377	No	Epha6	Mus musculus
GO:0001540	amyloid-beta binding	0.377	No	Epha6	Mus musculus
GO:0045202	synapse	0.375	No	Epha6	Mus musculus
GO:0090022	regulation of neutrophil chemotaxis	0.374	No	Epha6	Mus musculus
GO:0032103	positive regulation of response to external stimulus	0.374	No	Epha6	Mus musculus
GO:0043679	axon terminus	0.373	No	Epha6	Mus musculus
GO:0030424	axon	0.373	No	Epha6	Mus musculus
R-MMU-500792	GPCR ligand binding	0.372	No	Epha6	Mus musculus
GO:0050804	modulation of chemical synaptic transmission	0.372	No	Epha6	Mus musculus
GO:0008305	integrin complex	0.371	No	Epha6	Mus musculus
GO:0032432	actin filament bundle	0.369	No	Epha6	Mus musculus
GO:0045446	endothelial cell differentiation	0.368	No	Epha6	Mus musculus
GO:0098794	postsynapse	0.368	No	Epha6	Mus musculus
GO:0098636	protein complex involved in cell adhesion	0.368	No	Epha6	Mus musculus
R-MMU-445355	Smooth Muscle Contraction	0.367	No	Epha6	Mus musculus
GO:0061035	regulation of cartilage development	0.366	No	Epha6	Mus musculus
GO:0031175	neuron projection development	0.366	No	Epha6	Mus musculus
GO:0010975	regulation of neuron projection development	0.366	No	Epha6	Mus musculus
4380	Osteoclast differentiation	0.364	No	Epha6	Mus musculus
GO:0060560	developmental growth involved in morphogenesis	0.363	No	Epha6	Mus musculus
GO:0001725	stress fiber	0.361	No	Epha6	Mus musculus
GO:0097517	contractile actin filament bundle	0.361	No	Epha6	Mus musculus
GO:0071622	regulation of granulocyte chemotaxis	0.36	No	Epha6	Mus musculus
GO:0098984	neuron to neuron synapse	0.36	No	Epha6	Mus musculus
GO:0003012	muscle system process	0.359	No	Epha6	Mus musculus
GO:0032279	asymmetric synapse	0.359	No	Epha6	Mus musculus
GO:0048675	axon extension	0.357	No	Epha6	Mus musculus
GO:0070098	chemokine-mediated signaling pathway	0.357	No	Epha6	Mus musculus
GO:0014069	postsynaptic density	0.357	No	Epha6	Mus musculus
GO:0019955	cytokine binding	0.355	No	Epha6	Mus musculus
GO:0097755	positive regulation of blood vessel diameter	0.355	No	Epha6	Mus musculus
GO:0030336	negative regulation of cell migration	0.354	No	Epha6	Mus musculus
GO:0042641	actomyosin	0.354	No	Epha6	Mus musculus
GO:2000146	negative regulation of cell motility	0.353	No	Epha6	Mus musculus
GO:0002687	positive regulation of leukocyte migration	0.352	No	Epha6	Mus musculus
GO:0099572	postsynaptic specialization	0.351	No	Epha6	Mus musculus
GO:0070374	positive regulation of ERK1 and ERK2 cascade	0.35	No	Epha6	Mus musculus
GO:0045664	regulation of neuron differentiation	0.349	No	Epha6	Mus musculus
GO:0006936	muscle contraction	0.348	No	Epha6	Mus musculus
GO:0061564	axon development	0.348	No	Epha6	Mus musculus
GO:0030516	regulation of axon extension	0.347	No	Epha6	Mus musculus
GO:0007409	axonogenesis	0.347	No	Epha6	Mus musculus
GO:0010977	negative regulation of neuron projection development	0.347	No	Epha6	Mus musculus
GO:0003158	endothelium development	0.346	No	Epha6	Mus musculus
GO:0045666	positive regulation of neuron differentiation	0.346	No	Epha6	Mus musculus
GO:0098552	side of membrane	0.346	No	Epha6	Mus musculus
R-MMU-76002	Platelet activation, signaling and aggregation	0.345	No	Epha6	Mus musculus
GO:0010761	fibroblast migration	0.345	No	Epha6	Mus musculus
GO:0060326	cell chemotaxis	0.344	No	Epha6	Mus musculus
GO:0099536	synaptic signaling	0.344	No	Epha6	Mus musculus
4060	Cytokine-cytokine receptor interaction	0.344	No	Epha6	Mus musculus
5412	Arrhythmogenic right ventricular cardiomyopathy (ARVC)	0.343	No	Epha6	Mus musculus
GO:0007268	chemical synaptic transmission	0.343	No	Epha6	Mus musculus
GO:0098916	anterograde trans-synaptic signaling	0.343	No	Epha6	Mus musculus
GO:0099537	trans-synaptic signaling	0.343	No	Epha6	Mus musculus
GO:0009593	detection of chemical stimulus	0.343	No	Epha6	Mus musculus
R-MMU-3000178	ECM proteoglycans	0.343	No	Epha6	Mus musculus
GO:0031281	positive regulation of cyclase activity	0.342	No	Epha6	Mus musculus
GO:0010976	positive regulation of neuron projection development	0.342	No	Epha6	Mus musculus
GO:0045211	postsynaptic membrane	0.342	No	Epha6	Mus musculus
GO:0030425	dendrite	0.342	No	Epha6	Mus musculus
GO:0043269	regulation of ion transport	0.341	No	Epha6	Mus musculus
GO:0042383	sarcolemma	0.341	No	Epha6	Mus musculus
GO:0008083	growth factor activity	0.341	No	Epha6	Mus musculus
GO:0048008	platelet-derived growth factor receptor signaling pathway	0.341	No	Epha6	Mus musculus
GO:0015347	sodium-independent organic anion transmembrane transporter activity	0.34	No	Epha6	Mus musculus
GO:0050906	detection of stimulus involved in sensory perception	0.339	No	Epha6	Mus musculus
GO:0007215	glutamate receptor signaling pathway	0.337	No	Epha6	Mus musculus
GO:0043252	sodium-independent organic anion transport	0.337	No	Epha6	Mus musculus
R-MMU-397014	Muscle contraction	0.336	No	Epha6	Mus musculus
GO:0051271	negative regulation of cellular component movement	0.336	No	Epha6	Mus musculus
GO:0045778	positive regulation of ossification	0.334	No	Epha6	Mus musculus
GO:0050907	detection of chemical stimulus involved in sensory perception	0.334	No	Epha6	Mus musculus
GO:0006937	regulation of muscle contraction	0.333	No	Epha6	Mus musculus
GO:0002548	monocyte chemotaxis	0.333	No	Epha6	Mus musculus
GO:1900449	regulation of glutamate receptor signaling pathway	0.333	No	Epha6	Mus musculus
GO:0034705	potassium channel complex	0.332	No	Epha6	Mus musculus
GO:0061387	regulation of extent of cell growth	0.332	No	Epha6	Mus musculus
GO:0051962	positive regulation of nervous system development	0.332	No	Epha6	Mus musculus
GO:0043410	positive regulation of MAPK cascade	0.332	No	Epha6	Mus musculus
GO:0007416	synapse assembly	0.332	No	Epha6	Mus musculus
GO:0033267	axon part	0.332	No	Epha6	Mus musculus
5146	Amoebiasis	0.332	No	Epha6	Mus musculus
4640	Hematopoietic cell lineage	0.332	No	Epha6	Mus musculus
GO:0051606	detection of stimulus	0.331	No	Epha6	Mus musculus
GO:0030278	regulation of ossification	0.33	No	Epha6	Mus musculus
GO:0003203	endocardial cushion morphogenesis	0.329	No	Epha6	Mus musculus
GO:0098589	membrane region	0.329	No	Epha6	Mus musculus
GO:0030315	T-tubule	0.329	No	Epha6	Mus musculus
GO:0003018	vascular process in circulatory system	0.328	No	Epha6	Mus musculus
R-MMU-1474244	Extracellular matrix organization	0.328	No	Epha6	Mus musculus
GO:0098609	cell-cell adhesion	0.327	No	Epha6	Mus musculus
GO:0045121	membrane raft	0.327	No	Epha6	Mus musculus
GO:0098857	membrane microdomain	0.327	No	Epha6	Mus musculus
GO:0045669	positive regulation of osteoblast differentiation	0.324	No	Epha6	Mus musculus
GO:0003198	epithelial to mesenchymal transition involved in endocardial cushion formation	0.323	No	Epha6	Mus musculus
GO:0030334	regulation of cell migration	0.323	No	Epha6	Mus musculus
GO:0050808	synapse organization	0.323	No	Epha6	Mus musculus
R-MMU-381753	Olfactory Signaling Pathway	0.323	No	Epha6	Mus musculus
GO:0045785	positive regulation of cell adhesion	0.321	No	Epha6	Mus musculus
GO:1904062	regulation of cation transmembrane transport	0.321	No	Epha6	Mus musculus
5410	Hypertrophic cardiomyopathy (HCM)	0.321	No	Epha6	Mus musculus
GO:0040012	regulation of locomotion	0.321	No	Epha6	Mus musculus
GO:0010863	positive regulation of phospholipase C activity	0.321	No	Epha6	Mus musculus
GO:0034762	regulation of transmembrane transport	0.32	No	Epha6	Mus musculus
GO:0070372	regulation of ERK1 and ERK2 cascade	0.32	No	Epha6	Mus musculus
GO:0034446	substrate adhesion-dependent cell spreading	0.32	No	Epha6	Mus musculus
GO:0044853	plasma membrane raft	0.32	No	Epha6	Mus musculus
GO:0005178	integrin binding	0.32	No	Epha6	Mus musculus
5414	Dilated cardiomyopathy	0.319	No	Epha6	Mus musculus
GO:0060317	cardiac epithelial to mesenchymal transition	0.318	No	Epha6	Mus musculus
GO:0035296	regulation of tube diameter	0.318	No	Epha6	Mus musculus
GO:0097746	regulation of blood vessel diameter	0.318	No	Epha6	Mus musculus
GO:0007160	cell-matrix adhesion	0.318	No	Epha6	Mus musculus
GO:0040017	positive regulation of locomotion	0.318	No	Epha6	Mus musculus
GO:0030335	positive regulation of cell migration	0.318	No	Epha6	Mus musculus
GO:2000145	regulation of cell motility	0.318	No	Epha6	Mus musculus
GO:0050880	regulation of blood vessel size	0.317	No	Epha6	Mus musculus
GO:0070371	ERK1 and ERK2 cascade	0.317	No	Epha6	Mus musculus
GO:2000147	positive regulation of cell motility	0.317	No	Epha6	Mus musculus
GO:0034765	regulation of ion transmembrane transport	0.316	No	Epha6	Mus musculus
GO:0035150	regulation of tube size	0.316	No	Epha6	Mus musculus
GO:0022603	regulation of anatomical structure morphogenesis	0.316	No	Epha6	Mus musculus
GO:0004930	G-protein coupled receptor activity	0.316	No	Epha6	Mus musculus
GO:0019233	sensory perception of pain	0.316	No	Epha6	Mus musculus
GO:0045762	positive regulation of adenylate cyclase activity	0.315	No	Epha6	Mus musculus
GO:0006935	chemotaxis	0.315	No	Epha6	Mus musculus
GO:0051272	positive regulation of cellular component movement	0.315	No	Epha6	Mus musculus
GO:0008016	regulation of heart contraction	0.314	No	Epha6	Mus musculus
GO:0042330	taxis	0.314	No	Epha6	Mus musculus
GO:0051966	regulation of synaptic transmission, glutamatergic	0.314	No	Epha6	Mus musculus
GO:0014812	muscle cell migration	0.313	No	Epha6	Mus musculus
GO:0014910	regulation of smooth muscle cell migration	0.313	No	Epha6	Mus musculus
GO:0003272	endocardial cushion formation	0.311	No	Epha6	Mus musculus
GO:1903522	regulation of blood circulation	0.311	No	Epha6	Mus musculus
4510	Focal adhesion	0.311	No	Epha6	Mus musculus
R-MMU-114608	Platelet degranulation	0.311	No	Epha6	Mus musculus
GO:0006939	smooth muscle contraction	0.311	No	Epha6	Mus musculus
GO:0051349	positive regulation of lyase activity	0.31	No	Epha6	Mus musculus
GO:0002719	negative regulation of cytokine production involved in immune response	0.309	No	Epha6	Mus musculus
GO:0071674	mononuclear cell migration	0.308	No	Epha6	Mus musculus
R-MMU-418594	G alpha (i) signalling events	0.308	No	Epha6	Mus musculus
GO:0044259	multicellular organismal macromolecule metabolic process	0.307	No	Epha6	Mus musculus
GO:0051270	regulation of cellular component movement	0.307	No	Epha6	Mus musculus
GO:0030198	extracellular matrix organization	0.307	No	Epha6	Mus musculus
GO:0043062	extracellular structure organization	0.307	No	Epha6	Mus musculus
4512	ECM-receptor interaction	0.307	No	Epha6	Mus musculus
5144	Malaria	0.305	No	Epha6	Mus musculus
GO:0030810	positive regulation of nucleotide biosynthetic process	0.304	No	Epha6	Mus musculus
GO:1900373	positive regulation of purine nucleotide biosynthetic process	0.304	No	Epha6	Mus musculus
GO:2000311	regulation of AMPA receptor activity	0.304	No	Epha6	Mus musculus
GO:0003197	endocardial cushion development	0.303	No	Epha6	Mus musculus
GO:0032963	collagen metabolic process	0.303	No	Epha6	Mus musculus
GO:0031279	regulation of cyclase activity	0.303	No	Epha6	Mus musculus
GO:0019229	regulation of vasoconstriction	0.303	No	Epha6	Mus musculus
R-MMU-1474290	Collagen formation	0.303	No	Epha6	Mus musculus
GO:0031589	cell-substrate adhesion	0.301	No	Epha6	Mus musculus
R-MMU-1650814	Collagen biosynthesis and modifying enzymes	0.301	No	Epha6	Mus musculus
GO:0061061	muscle structure development	0.3	No	Epha6	Mus musculus
R-MMU-5576891	Cardiac conduction	0.3	No	Epha6	Mus musculus
GO:0007204	positive regulation of cytosolic calcium ion concentration	0.298	No	Epha6	Mus musculus
GO:0050803	regulation of synapse structure or activity	0.298	No	Epha6	Mus musculus
GO:0001755	neural crest cell migration	0.297	No	Epha6	Mus musculus
GO:0050921	positive regulation of chemotaxis	0.297	No	Epha6	Mus musculus
GO:0050840	extracellular matrix binding	0.297	No	Epha6	Mus musculus
GO:0045667	regulation of osteoblast differentiation	0.296	No	Epha6	Mus musculus
R-MMU-1566948	Elastic fibre formation	0.296	No	Epha6	Mus musculus
GO:0050807	regulation of synapse organization	0.295	No	Epha6	Mus musculus
GO:0005518	collagen binding	0.294	No	Epha6	Mus musculus
R-MMU-191273	Cholesterol biosynthesis	0.293	No	Epha6	Mus musculus
R-MMU-2129379	Molecules associated with elastic fibres	0.293	No	Epha6	Mus musculus
GO:0005901	caveola	0.292	No	Epha6	Mus musculus
GO:0030801	positive regulation of cyclic nucleotide metabolic process	0.29	No	Epha6	Mus musculus
GO:0044057	regulation of system process	0.29	No	Epha6	Mus musculus
GO:0050920	regulation of chemotaxis	0.29	No	Epha6	Mus musculus
R-MMU-216083	Integrin cell surface interactions	0.29	No	Epha6	Mus musculus
GO:0090287	regulation of cellular response to growth factor stimulus	0.289	No	Epha6	Mus musculus
GO:0010575	positive regulation of vascular endothelial growth factor production	0.289	No	Epha6	Mus musculus
GO:0030804	positive regulation of cyclic nucleotide biosynthetic process	0.288	No	Epha6	Mus musculus
GO:0007044	cell-substrate junction assembly	0.288	No	Epha6	Mus musculus
GO:0032040	small-subunit processome	0.288	No	Epha6	Mus musculus
GO:0044420	extracellular matrix component	0.288	No	Epha6	Mus musculus
GO:1900371	regulation of purine nucleotide biosynthetic process	0.286	No	Epha6	Mus musculus
GO:0048483	autonomic nervous system development	0.286	No	Epha6	Mus musculus
GO:0045765	regulation of angiogenesis	0.284	No	Epha6	Mus musculus
GO:0001580	detection of chemical stimulus involved in sensory perception of bitter taste	0.284	No	Epha6	Mus musculus
GO:0005604	basement membrane	0.283	No	Epha6	Mus musculus
GO:0030808	regulation of nucleotide biosynthetic process	0.282	No	Epha6	Mus musculus
GO:1901888	regulation of cell junction assembly	0.282	No	Epha6	Mus musculus
GO:1901342	regulation of vasculature development	0.282	No	Epha6	Mus musculus
GO:0033038	bitter taste receptor activity	0.282	No	Epha6	Mus musculus
GO:0001568	blood vessel development	0.28	No	Epha6	Mus musculus
GO:0019838	growth factor binding	0.279	No	Epha6	Mus musculus
GO:0003416	endochondral bone growth	0.278	No	Epha6	Mus musculus
GO:0005578	proteinaceous extracellular matrix	0.277	No	Epha6	Mus musculus
GO:0001944	vasculature development	0.276	No	Epha6	Mus musculus
GO:0030594	neurotransmitter receptor activity	0.276	No	Epha6	Mus musculus
GO:0008527	taste receptor activity	0.276	No	Epha6	Mus musculus
GO:0003151	outflow tract morphogenesis	0.275	No	Epha6	Mus musculus
GO:0008227	G-protein coupled amine receptor activity	0.275	No	Epha6	Mus musculus
GO:0048486	parasympathetic nervous system development	0.275	No	Epha6	Mus musculus
GO:0010810	regulation of cell-substrate adhesion	0.274	No	Epha6	Mus musculus
GO:0072358	cardiovascular system development	0.274	No	Epha6	Mus musculus
R-MMU-8948216	Collagen chain trimerization	0.273	No	Epha6	Mus musculus
GO:0001968	fibronectin binding	0.273	No	Epha6	Mus musculus
GO:0001525	angiogenesis	0.272	No	Epha6	Mus musculus
GO:0048762	mesenchymal cell differentiation	0.269	No	Epha6	Mus musculus
GO:0030816	positive regulation of cAMP metabolic process	0.269	No	Epha6	Mus musculus
GO:0048514	blood vessel morphogenesis	0.269	No	Epha6	Mus musculus
GO:0005813	centrosome	-0.269	No	Epha6	Mus musculus
GO:0140097	catalytic activity, acting on DNA	-0.27	No	Epha6	Mus musculus
GO:0044438	microbody part	-0.27	No	Epha6	Mus musculus
GO:0044439	peroxisomal part	-0.27	No	Epha6	Mus musculus
R-MMU-6807070	PTEN Regulation	-0.27	No	Epha6	Mus musculus
GO:0000819	sister chromatid segregation	-0.271	No	Epha6	Mus musculus
GO:0140014	mitotic nuclear division	-0.271	No	Epha6	Mus musculus
GO:0034502	protein localization to chromosome	-0.271	No	Epha6	Mus musculus
GO:0046700	heterocycle catabolic process	-0.271	No	Epha6	Mus musculus
GO:0036503	ERAD pathway	-0.271	No	Epha6	Mus musculus
GO:0032200	telomere organization	-0.273	No	Epha6	Mus musculus
GO:0008757	S-adenosylmethionine-dependent methyltransferase activity	-0.273	No	Epha6	Mus musculus
R-MMU-194315	Signaling by Rho GTPases	-0.273	No	Epha6	Mus musculus
GO:0046034	ATP metabolic process	-0.274	No	Epha6	Mus musculus
GO:0099023	tethering complex	-0.275	No	Epha6	Mus musculus
GO:0000723	telomere maintenance	-0.276	No	Epha6	Mus musculus
GO:0044427	chromosomal part	-0.276	No	Epha6	Mus musculus
GO:1901992	positive regulation of mitotic cell cycle phase transition	-0.276	No	Epha6	Mus musculus
R-MMU-429914	Deadenylation-dependent mRNA decay	-0.276	No	Epha6	Mus musculus
GO:0071806	protein transmembrane transport	-0.276	No	Epha6	Mus musculus
GO:0090501	RNA phosphodiester bond hydrolysis	-0.276	No	Epha6	Mus musculus
GO:0007005	mitochondrion organization	-0.277	No	Epha6	Mus musculus
GO:0003730	mRNA 3'-UTR binding	-0.277	No	Epha6	Mus musculus
GO:0044270	cellular nitrogen compound catabolic process	-0.278	No	Epha6	Mus musculus
GO:0065002	intracellular protein transmembrane transport	-0.279	No	Epha6	Mus musculus
R-MMU-198933	Immunoregulatory interactions between a Lymphoid and a non-Lymphoid cell	-0.279	No	Epha6	Mus musculus
GO:0034622	cellular macromolecular complex assembly	-0.28	No	Epha6	Mus musculus
GO:0071897	DNA biosynthetic process	-0.28	No	Epha6	Mus musculus
GO:0006260	DNA replication	-0.28	No	Epha6	Mus musculus
GO:0016071	mRNA metabolic process	-0.28	No	Epha6	Mus musculus
GO:0034976	response to endoplasmic reticulum stress	-0.28	No	Epha6	Mus musculus
GO:0005694	chromosome	-0.281	No	Epha6	Mus musculus
GO:0006402	mRNA catabolic process	-0.281	No	Epha6	Mus musculus
GO:0006278	RNA-dependent DNA biosynthetic process	-0.282	No	Epha6	Mus musculus
GO:0007004	telomere maintenance via telomerase	-0.282	No	Epha6	Mus musculus
GO:0051054	positive regulation of DNA metabolic process	-0.282	No	Epha6	Mus musculus
GO:0019373	epoxygenase P450 pathway	-0.282	No	Epha6	Mus musculus
GO:0010833	telomere maintenance via telomere lengthening	-0.283	No	Epha6	Mus musculus
GO:0031570	DNA integrity checkpoint	-0.283	No	Epha6	Mus musculus
R-MMU-201681	TCF dependent signaling in response to WNT	-0.283	No	Epha6	Mus musculus
GO:0001909	leukocyte mediated cytotoxicity	-0.285	No	Epha6	Mus musculus
GO:0007093	mitotic cell cycle checkpoint	-0.286	No	Epha6	Mus musculus
GO:0008391	arachidonic acid monooxygenase activity	-0.286	No	Epha6	Mus musculus
GO:0000956	nuclear-transcribed mRNA catabolic process	-0.287	No	Epha6	Mus musculus
GO:1901987	regulation of cell cycle phase transition	-0.288	No	Epha6	Mus musculus
GO:0000228	nuclear chromosome	-0.288	No	Epha6	Mus musculus
GO:0006259	DNA metabolic process	-0.288	No	Epha6	Mus musculus
GO:0034655	nucleobase-containing compound catabolic process	-0.288	No	Epha6	Mus musculus
GO:1903311	regulation of mRNA metabolic process	-0.288	No	Epha6	Mus musculus
GO:0022402	cell cycle process	-0.289	No	Epha6	Mus musculus
GO:0090305	nucleic acid phosphodiester bond hydrolysis	-0.289	No	Epha6	Mus musculus
GO:1904356	regulation of telomere maintenance via telomere lengthening	-0.29	No	Epha6	Mus musculus
GO:0009205	purine ribonucleoside triphosphate metabolic process	-0.291	No	Epha6	Mus musculus
GO:1903047	mitotic cell cycle process	-0.292	No	Epha6	Mus musculus
GO:0009199	ribonucleoside triphosphate metabolic process	-0.293	No	Epha6	Mus musculus
GO:1901988	negative regulation of cell cycle phase transition	-0.293	No	Epha6	Mus musculus
GO:0008535	respiratory chain complex IV assembly	-0.293	No	Epha6	Mus musculus
GO:0000075	cell cycle checkpoint	-0.294	No	Epha6	Mus musculus
GO:0004896	cytokine receptor activity	-0.294	No	Epha6	Mus musculus
GO:0032204	regulation of telomere maintenance	-0.295	No	Epha6	Mus musculus
GO:0009144	purine nucleoside triphosphate metabolic process	-0.296	No	Epha6	Mus musculus
GO:0055114	oxidation-reduction process	-0.297	No	Epha6	Mus musculus
GO:0000785	chromatin	-0.297	No	Epha6	Mus musculus
GO:1901990	regulation of mitotic cell cycle phase transition	-0.298	No	Epha6	Mus musculus
GO:0000077	DNA damage checkpoint	-0.299	No	Epha6	Mus musculus
830	Retinol metabolism	-0.299	No	Epha6	Mus musculus
GO:0016567	protein ubiquitination	-0.3	No	Epha6	Mus musculus
GO:0031248	protein acetyltransferase complex	-0.301	No	Epha6	Mus musculus
GO:1902493	acetyltransferase complex	-0.301	No	Epha6	Mus musculus
GO:0008392	arachidonic acid epoxygenase activity	-0.301	No	Epha6	Mus musculus
GO:1901991	negative regulation of mitotic cell cycle phase transition	-0.302	No	Epha6	Mus musculus
GO:0006974	cellular response to DNA damage stimulus	-0.302	No	Epha6	Mus musculus
GO:0031396	regulation of protein ubiquitination	-0.303	No	Epha6	Mus musculus
R-MMU-74160	Gene expression (Transcription)	-0.304	No	Epha6	Mus musculus
GO:0070647	protein modification by small protein conjugation or removal	-0.304	No	Epha6	Mus musculus
GO:0032446	protein modification by small protein conjugation	-0.304	No	Epha6	Mus musculus
GO:1990234	transferase complex	-0.305	No	Epha6	Mus musculus
GO:0010564	regulation of cell cycle process	-0.306	No	Epha6	Mus musculus
GO:1903320	regulation of protein modification by small protein conjugation or removal	-0.306	No	Epha6	Mus musculus
GO:0072527	pyrimidine-containing compound metabolic process	-0.306	No	Epha6	Mus musculus
GO:0044770	cell cycle phase transition	-0.307	No	Epha6	Mus musculus
R-MMU-73857	RNA Polymerase II Transcription	-0.307	No	Epha6	Mus musculus
GO:0051276	chromosome organization	-0.309	No	Epha6	Mus musculus
GO:0000278	mitotic cell cycle	-0.31	No	Epha6	Mus musculus
GO:0051052	regulation of DNA metabolic process	-0.31	No	Epha6	Mus musculus
R-MMU-3700989	Transcriptional Regulation by TP53	-0.31	No	Epha6	Mus musculus
GO:0044772	mitotic cell cycle phase transition	-0.311	No	Epha6	Mus musculus
GO:0008276	protein methyltransferase activity	-0.313	No	Epha6	Mus musculus
GO:0000123	histone acetyltransferase complex	-0.314	No	Epha6	Mus musculus
GO:0010608	posttranscriptional regulation of gene expression	-0.315	No	Epha6	Mus musculus
4662	B cell receptor signaling pathway	-0.318	No	Epha6	Mus musculus
GO:0008170	N-methyltransferase activity	-0.319	No	Epha6	Mus musculus
R-MMU-2142753	Arachidonic acid metabolism	-0.319	No	Epha6	Mus musculus
GO:0044265	cellular macromolecule catabolic process	-0.319	No	Epha6	Mus musculus
GO:0034399	nuclear periphery	-0.319	No	Epha6	Mus musculus
GO:0001650	fibrillar center	-0.319	No	Epha6	Mus musculus
GO:0030258	lipid modification	-0.321	No	Epha6	Mus musculus
GO:0016607	nuclear speck	-0.321	No	Epha6	Mus musculus
GO:2001252	positive regulation of chromosome organization	-0.322	No	Epha6	Mus musculus
R-MMU-211945	Phase I - Functionalization of compounds	-0.322	No	Epha6	Mus musculus
GO:0044451	nucleoplasm part	-0.322	No	Epha6	Mus musculus
R-MMU-212436	Generic Transcription Pathway	-0.326	No	Epha6	Mus musculus
GO:0007346	regulation of mitotic cell cycle	-0.328	No	Epha6	Mus musculus
GO:0019395	fatty acid oxidation	-0.329	No	Epha6	Mus musculus
GO:0034440	lipid oxidation	-0.33	No	Epha6	Mus musculus
GO:0016604	nuclear body	-0.33	No	Epha6	Mus musculus
GO:0017148	negative regulation of translation	-0.331	No	Epha6	Mus musculus
GO:0032259	methylation	-0.332	No	Epha6	Mus musculus
GO:0005635	nuclear envelope	-0.332	No	Epha6	Mus musculus
GO:0005758	mitochondrial intermembrane space	-0.335	No	Epha6	Mus musculus
R-MMU-5633007	Regulation of TP53 Activity	-0.337	No	Epha6	Mus musculus
GO:0043414	macromolecule methylation	-0.338	No	Epha6	Mus musculus
GO:0033044	regulation of chromosome organization	-0.338	No	Epha6	Mus musculus
GO:0051726	regulation of cell cycle	-0.339	No	Epha6	Mus musculus
GO:0006417	regulation of translation	-0.339	No	Epha6	Mus musculus
280	Valine, leucine and isoleucine degradation	-0.34	No	Epha6	Mus musculus
GO:0061695	transferase complex, transferring phosphorus-containing groups	-0.346	No	Epha6	Mus musculus
GO:0033365	protein localization to organelle	-0.347	No	Epha6	Mus musculus
GO:0017004	cytochrome complex assembly	-0.347	No	Epha6	Mus musculus
GO:0034248	regulation of cellular amide metabolic process	-0.352	No	Epha6	Mus musculus
GO:0031305	integral component of mitochondrial inner membrane	-0.353	No	Epha6	Mus musculus
GO:0030947	regulation of vascular endothelial growth factor receptor signaling pathway	-0.356	No	Epha6	Mus musculus
4973	Carbohydrate digestion and absorption	-0.356	No	Epha6	Mus musculus
R-MMU-77289	Mitochondrial Fatty Acid Beta-Oxidation	-0.357	No	Epha6	Mus musculus
640	Propanoate metabolism	-0.357	No	Epha6	Mus musculus
GO:0031329	regulation of cellular catabolic process	-0.36	No	Epha6	Mus musculus
GO:0031304	intrinsic component of mitochondrial inner membrane	-0.362	No	Epha6	Mus musculus
GO:0019865	immunoglobulin binding	-0.362	No	Epha6	Mus musculus
GO:0034032	purine nucleoside bisphosphate metabolic process	-0.364	No	Epha6	Mus musculus
GO:0033865	nucleoside bisphosphate metabolic process	-0.364	No	Epha6	Mus musculus
GO:0033875	ribonucleoside bisphosphate metabolic process	-0.364	No	Epha6	Mus musculus
GO:0006886	intracellular protein transport	-0.369	No	Epha6	Mus musculus
GO:0006479	protein methylation	-0.369	No	Epha6	Mus musculus
GO:0008213	protein alkylation	-0.369	No	Epha6	Mus musculus
GO:0050853	B cell receptor signaling pathway	-0.376	No	Epha6	Mus musculus
GO:0018205	peptidyl-lysine modification	-0.386	No	Epha6	Mus musculus
GO:0000166	nucleotide binding	-0.389	No	Epha6	Mus musculus
GO:1901265	nucleoside phosphate binding	-0.389	No	Epha6	Mus musculus
630	Glyoxylate and dicarboxylate metabolism	-0.39	No	Epha6	Mus musculus
GO:0006505	GPI anchor metabolic process	-0.391	No	Epha6	Mus musculus
GO:0006506	GPI anchor biosynthetic process	-0.397	No	Epha6	Mus musculus
982	Drug metabolism - cytochrome P450	-0.401	No	Epha6	Mus musculus
GO:0003735	structural constituent of ribosome	-0.403	No	Epha6	Mus musculus
GO:0016570	histone modification	-0.409	No	Epha6	Mus musculus
980	Metabolism of xenobiotics by cytochrome P450	-0.41	No	Epha6	Mus musculus
GO:0097031	mitochondrial respiratory chain complex I biogenesis	-0.413	No	Epha6	Mus musculus
GO:0010257	NADH dehydrogenase complex assembly	-0.413	No	Epha6	Mus musculus
GO:0032981	mitochondrial respiratory chain complex I assembly	-0.413	No	Epha6	Mus musculus
GO:0018022	peptidyl-lysine methylation	-0.413	No	Epha6	Mus musculus
GO:0015934	large ribosomal subunit	-0.414	No	Epha6	Mus musculus
563	Glycosylphosphatidylinositol(GPI)-anchor biosynthesis	-0.416	No	Epha6	Mus musculus
GO:0032559	adenyl ribonucleotide binding	-0.418	No	Epha6	Mus musculus
GO:0017076	purine nucleotide binding	-0.418	No	Epha6	Mus musculus
GO:0030554	adenyl nucleotide binding	-0.42	No	Epha6	Mus musculus
GO:0016655	oxidoreductase activity, acting on NAD(P)H, quinone or similar compound as acceptor	-0.423	No	Epha6	Mus musculus
GO:0035639	purine ribonucleoside triphosphate binding	-0.431	No	Epha6	Mus musculus
GO:0005524	ATP binding	-0.445	No	Epha6	Mus musculus
5016	Huntington's disease	-0.457	No	Epha6	Mus musculus
GO:0006099	tricarboxylic acid cycle	-0.46	No	Epha6	Mus musculus
GO:0006119	oxidative phosphorylation	-0.461	No	Epha6	Mus musculus
R-MMU-71406	Pyruvate metabolism and Citric Acid (TCA) cycle	-0.465	No	Epha6	Mus musculus
R-MMU-1592230	Mitochondrial biogenesis	-0.483	No	Epha6	Mus musculus
GO:0042775	mitochondrial ATP synthesis coupled electron transport	-0.492	No	Epha6	Mus musculus
GO:0003954	NADH dehydrogenase activity	-0.493	No	Epha6	Mus musculus
GO:0042773	ATP synthesis coupled electron transport	-0.496	No	Epha6	Mus musculus
GO:0009060	aerobic respiration	-0.504	No	Epha6	Mus musculus
GO:0140053	mitochondrial gene expression	-0.516	No	Epha6	Mus musculus
GO:0070069	cytochrome complex	-0.52	No	Epha6	Mus musculus
GO:0072329	monocarboxylic acid catabolic process	-0.529	No	Epha6	Mus musculus
GO:0006635	fatty acid beta-oxidation	-0.54	No	Epha6	Mus musculus
GO:0009295	nucleoid	-0.543	No	Epha6	Mus musculus
GO:0042645	mitochondrial nucleoid	-0.543	No	Epha6	Mus musculus
GO:0009062	fatty acid catabolic process	-0.546	No	Epha6	Mus musculus
GO:0005759	mitochondrial matrix	-0.553	No	Epha6	Mus musculus
GO:0032543	mitochondrial translation	-0.556	No	Epha6	Mus musculus
GO:0033108	mitochondrial respiratory chain complex assembly	-0.576	No	Epha6	Mus musculus
GO:0044429	mitochondrial part	-0.576	No	Epha6	Mus musculus
GO:0051188	cofactor biosynthetic process	-0.577	No	Epha6	Mus musculus
GO:0005840	ribosome	-0.585	No	Epha6	Mus musculus
GO:0044391	ribosomal subunit	-0.585	No	Epha6	Mus musculus
GO:0031966	mitochondrial membrane	-0.586	No	Epha6	Mus musculus
GO:0009108	coenzyme biosynthetic process	-0.588	No	Epha6	Mus musculus
R-MMU-5368287	Mitochondrial translation	-0.591	No	Epha6	Mus musculus
R-MMU-5419276	Mitochondrial translation termination	-0.591	No	Epha6	Mus musculus
GO:0000313	organellar ribosome	-0.592	No	Epha6	Mus musculus
GO:0005761	mitochondrial ribosome	-0.592	No	Epha6	Mus musculus
R-MMU-5389840	Mitochondrial translation elongation	-0.593	No	Epha6	Mus musculus
GO:0005740	mitochondrial envelope	-0.594	No	Epha6	Mus musculus
R-MMU-72766	Translation	-0.601	No	Epha6	Mus musculus
GO:0019866	organelle inner membrane	-0.601	No	Epha6	Mus musculus
GO:0034364	high-density lipoprotein particle	-0.603	No	Epha6	Mus musculus
GO:0005777	peroxisome	-0.603	No	Epha6	Mus musculus
GO:0042579	microbody	-0.603	No	Epha6	Mus musculus
GO:0000315	organellar large ribosomal subunit	-0.619	No	Epha6	Mus musculus
GO:0005762	mitochondrial large ribosomal subunit	-0.619	No	Epha6	Mus musculus
R-MMU-6799198	Complex I biogenesis	-0.638	No	Epha6	Mus musculus
190	Oxidative phosphorylation	-0.657	No	Epha6	Mus musculus
GO:0045271	respiratory chain complex I	-0.659	No	Epha6	Mus musculus
GO:0005747	mitochondrial respiratory chain complex I	-0.659	No	Epha6	Mus musculus
GO:0030964	NADH dehydrogenase complex	-0.659	No	Epha6	Mus musculus
20	Citrate cycle (TCA cycle)	-0.663	No	Epha6	Mus musculus
5012	Parkinson's disease	-0.665	No	Epha6	Mus musculus
R-MMU-163200	Respiratory electron transport, ATP synthesis by chemiosmotic coupling, and heat production by uncoupling proteins.	-0.681	No	Epha6	Mus musculus
5010	Alzheimer's disease	-0.688	No	Epha6	Mus musculus
R-MMU-163210	Formation of ATP by chemiosmotic coupling	-0.692	No	Epha6	Mus musculus
R-MMU-8949613	Cristae formation	-0.692	No	Epha6	Mus musculus
GO:0070469	respiratory chain	-0.693	No	Epha6	Mus musculus
GO:0098803	respiratory chain complex	-0.693	No	Epha6	Mus musculus
GO:0098800	inner mitochondrial membrane protein complex	-0.695	No	Epha6	Mus musculus
GO:0005746	mitochondrial respiratory chain	-0.695	No	Epha6	Mus musculus
GO:0005753	mitochondrial proton-transporting ATP synthase complex	-0.699	No	Epha6	Mus musculus
GO:0045259	proton-transporting ATP synthase complex	-0.699	No	Epha6	Mus musculus
R-MMU-71403	Citric acid cycle (TCA cycle)	-0.711	No	Epha6	Mus musculus
GO:0022900	electron transport chain	-0.745	No	Epha6	Mus musculus
GO:0022904	respiratory electron transport chain	-0.745	No	Epha6	Mus musculus
GO:1990204	oxidoreductase complex	-0.812	No	Epha6	Mus musculus
R-MMU-611105	Respiratory electron transport	-0.826	No	Epha6	Mus musculus
GO:0098798	mitochondrial protein complex	-0.848	No	Epha6	Mus musculus
GO:0044455	mitochondrial membrane part	-0.856	No	Epha6	Mus musculus
R-MMU-1428517	The citric acid (TCA) cycle and respiratory electron transport	-0.859	No	Epha6	Mus musculus
GO:0045333	cellular respiration	-0.868	No	Epha6	Mus musculus
GO:0005743	mitochondrial inner membrane	-0.868	No	Epha6	Mus musculus

## Sheet: MUC4 (Human)
Path_id	Path_name	Score	Known connection	Gene	Species
R-HSA-5083636	Defective GALNT12 causes colorectal cancer 1 (CRCS1)	0.944	Yes	MUC4	Homo sapiens
R-HSA-5083625	Defective GALNT3 causes familial hyperphosphatemic tumoral calcinosis (HFTC)	0.924	Yes	MUC4	Homo sapiens
R-HSA-5083632	Defective C1GALT1C1 causes Tn polyagglutination syndrome (TNPS)	0.908	Yes	MUC4	Homo sapiens
R-HSA-977068	Termination of O-glycan biosynthesis	0.861	Yes	MUC4	Homo sapiens
GO:0016266	O-glycan processing	0.802	Yes	MUC4	Homo sapiens
R-HSA-913709	O-linked glycosylation of mucins	0.791	Yes	MUC4	Homo sapiens
R-HSA-5621480	Dectin-2 family	0.728	Yes	MUC4	Homo sapiens
GO:0006493	protein O-linked glycosylation	0.39	Yes	MUC4	Homo sapiens
R-HSA-72306	tRNA processing	-0.272	No	MUC4	Homo sapiens
R-HSA-8953854	Metabolism of RNA	-0.279	No	MUC4	Homo sapiens
R-HSA-8868773	rRNA processing in the nucleus and cytosol	-0.279	No	MUC4	Homo sapiens
R-HSA-72312	rRNA processing	-0.28	No	MUC4	Homo sapiens
R-HSA-6790901	rRNA modification in the nucleus and cytosol	-0.281	No	MUC4	Homo sapiens
GO:0042254	ribosome biogenesis	-0.303	No	MUC4	Homo sapiens
