# Supplementary material for: Genetic and dietary modulators of the inflammatory response in the gastrointestinal tract of the BXD mouse genetic reference population
Source: eLife. 2023 Oct 19;12:RP87569. doi: 10.7554/eLife.87569 (PMC10586803; doi:10.7554/eLife.87569)
Supplement: Supplementary file 6. [file elife-87569-supp6.xlsx]

## Sheet: mr_results_muc4_colon_ibd_uc_cd
id.exposure	id.outcome	outcome	exposure	method	nsnp	b	se	pval
Colon_Sigmoid_eqtl_gtex	ieu-a-31	Inflammatory bowel disease	Colon_Sigmoid_eqtl_gtex	Wald ratio	1	0.155281	0.0729335	0.0332476
Colon_Sigmoid_eqtl_gtex	ieu-a-32	Ulcerative colitis	Colon_Sigmoid_eqtl_gtex	Wald ratio	1	0.116413	0.0909452	0.200532
Colon_Sigmoid_eqtl_gtex	ukb-b-8210	Non-cancer illness code, self-reported: crohns disease	Colon_Sigmoid_eqtl_gtex	Inverse variance weighted	2	0.000137007	0.000413113	0.740156
Colon_Transverse_eqtl_gtex	ieu-a-31	Inflammatory bowel disease	Colon_Transverse_eqtl_gtex	Wald ratio	1	0.0973593	0.13112	0.457773
Colon_Transverse_eqtl_gtex	ieu-a-32	Ulcerative colitis	Colon_Transverse_eqtl_gtex	Wald ratio	1	0.11338	0.141595	0.423284
Colon_Transverse_eqtl_gtex	ukb-b-8210	Non-cancer illness code, self-reported: crohns disease	Colon_Transverse_eqtl_gtex	Wald ratio	1	0.00051797	0.000797574	0.516059
