# Supplementary material for: Genetic and dietary modulators of the inflammatory response in the gastrointestinal tract of the BXD mouse genetic reference population
Source: eLife. 2023 Oct 19;12:RP87569. doi: 10.7554/eLife.87569 (PMC10586803; doi:10.7554/eLife.87569)
Supplement: Supplementary file 7. [file elife-87569-supp7.xlsx]

## Sheet: IBD_medications
IBD Drugs
aspirin
beclometasone
quinine
aspirin 75mg tablet
prednisolone
methotrexateb
beclomethasone
loperamide
oxytetracycline
azathioprine
budesonide
sulfasalazine
hydrocortisone
betamethasone
hydroxychloroquine
asacol 400mg e/c tablet
mesalazine
doxycycline
sodium cromoglicate
hydrocortisone product
prednisone
pentasa sr 250mg m/r tablet
salazopyrin 500mg tablet
sulphasalazine
lymecycline
imodium 2mg capsule
mycophenolate
tacrolimus
leflunomide
plaquenil 200mg tablet
minocycline
asacol mr 400mg e/c tablet
proctosedyl ointment
tetralysal 300 capsule
prednisolone product
metronidazole
ciprofloxacin
triamcinolone
budesonide product
sodium cromoglycate
tetracycline
balsalazide disodium
humira 40mg injection solution 0.8ml prefilled syringe
dexamethasone
clotrimazole
metronidazole product
cyclosporin
neoral 10mg capsule
lomotil tablet
ciclosporin
colazide 750mg capsule
efudix cream
olsalazine
loperamide hydrochloride+simethicone
co-phenotrope
predfoam 20mg enema
adalimumab
epinephrine
mercaptopurine
corsodyl original mouthwash
benzydamine
adrenaline product
malarone tablet
tetralysal 204mg capsule
mtx - methotrexate
cellcept 250mg capsule
capecitabine
chloroquine
colifoam 10% foam
cromoglycate
adcortyl in orabase oral paste
clotrimazole product
miconazole
mesren mr 400mg m/r tablet
nystatin
hydrocortisone+lidocaine
prograf 0.5mg capsule
proctofoam hc foam
sebomin mr 100mg m/r capsule
imuran 10mg tablet
oxytetramix 250 tablet
cromolyn sodium
disodium cromoglycate
mepacrine
cya - cyclosporin
salofalk 250mg e/c tablet
azt - azathioprine
minocin 50mg tablet
norfloxacin
ciprofloxacin product
fluorouracil
imodium plus 2mg/125mg chewable tablet
ofloxacin
entocort cr 3mg m/r capsule
avloclor 250mg tablet
amphotericin
neomycin product
norimode 2mg tablet
myfortic 180mg gastro-resistant tablet
proguanil
paludrine tablet+avloclor tablet 100mg/250mg travel pack
arava 10mg tablet
dipentum 250mg capsule
mefloquine
lariam 250mg tablet
5fu - fluorouracil
5asa - mesalazine
adcortyl 0.1% cream
sirolimus
fludarabine
hydrocortisone+pramocaine
methotrexate
6mp - mercaptopurine
acea 0.75% gel
acrosoxacin
aknemin 100mg capsule
aknemin 50mg capsule
ambutonium bromide
amodiaquine
anabact 0.75% gel
anakinra
arava 100mg tablet
arava 20mg tablet
atovaquone
atovaquone+proguanil hydrochloride
ceratonia
chloroquine 200mg tablet
chloroquine 68mg/5ml syrup
clioquinol
clioquinol 1% ear drops
clioquinol+flumetasone pivalate 1%/0.02% ear drops
clioquinol+flumethasone pivalate 1%/0.02% ear drops
clomocycline sodium
colistin
dequadin lozenge
diareze 2mg capsule
diasorb 2mg capsule
diocalm dual action tablet
diocalm ultra 2mg capsule
doxatet 100mg tablet
doxylar 100mg capsule
efalizumab
eflornithine
entrocalm 2mg capsule
exocin 0.3% eye drops
flagyl 400mg tablet
fluoro-uracil 250mg capsule
fluorouracil 5% cream
glandosane plain spray
ipocol 400mg e/c tablet
kaolin product
kaolin+morphine
levofloxacin
loperagen 2mg capsule
malarivon 80mg/5ml syrup
mefloquine product
methotrexate
metronidazole+nystatin 400mg/10000units tablet+pessary
metrotop 0.8% gel
minocin 100mg tablet
minocin mr 100mg m/r capsule
moxifloxacin
mycophenolic acid 180mg gastro-resistant tablet
nalidixic acid
naxogin 500mg tablet
noritate 1% cream
norzol 200mg/5ml suspension
oxymycin 250mg tablet
paludrine 100mg tablet
pentamidine
periostat 20mg capsule
periostat 20mg tablet
primaquine
proguanil hydrochloride+chloroquine phosphate
puri-nethol 50mg tablet
pyrimethamine
salazosulfapyridine
sodium stibogluconate
sulphaguanidine
tavanic 500mg tablet
temafloxacin
trimetrexate
utinor 400mg tablet
vaginyl 200mg tablet
vaginyl 400mg tablet
vaniqa 11.5% cream 30g
vibramycin 100mg capsule
vibramycin 50mg capsule
vibramycin acne pack 50mg capsule
vibramycin-d 100mg dispersible tablet
xeloda 150mg tablet
zidoval 0.75% vaginal gel
zyomet 0.75% gel
ciproxin 100mg tablet
ciproxin 250mg tablet
ciproxin 500mg tablet
ciproxin 5g/100ml oral suspension
deltahydrocortisone
enterosan tablet
flagyl compak tablet+pessary
hydrocortistab 20mg tablet
sulazine ec 500mg e/c tablet
